# Supplementary material for: Flos Carthami Exerts Hepatoprotective Action in a Rat Model of Alcoholic Liver Injury via Modulating the Metabolomics Profile
Source: Evid Based Complement Alternat Med. 2022 May 2;2022:8158699. doi: 10.1155/2022/8158699 (PMC9085312; doi:10.1155/2022/8158699)
Supplement: Supplementary Materials — Additional Figure S1. Enrichment analysis of metabolites differentially expressed between the CG and MG. Additional Figure S2. Enrichment analysis of metabolites differentially expressed between the FC and MG. Additional Figure S3. Metabolite interaction network of FC-responsive metabolites in alcoholic liver injury. Additional File S1. List of ingredients in FC as reported in TCMSP. Additional File S2. List of metabolites differentially expressed between the CG and MG. Additional File S3. List of metabolites differentially expressed between the FC and MG. Additional File S4. List of FC-responsive metabolites in alcoholic liver injury. Additional File S5. Pearson correlation of FC-responsive metabolites in alcoholic liver injury. [file 8158699.f1.zip › 8158699.f1/Additional File S1 (1).txt]

Index	Mol ID	Molecule Name	MW	AlogP	Hdon	Hacc	OB(%)	Caco-2	BBB	DL	FASA-	HL	Save
1	MOL001097	o-xylene	106.18	2.802	0	0	45.54702339	1.84537	2.0771	0.014755	0	11.8621
2	MOL001099	p-xylene	106.18	2.802	0	0	48.74274687	1.82964	2.06351	0.014017	0	11.705484
3	MOL001129	l-Verbenone	150.24	1.942	0	1	50.66056161	1.25613	1.53024	0.061837	17.06999969	11.557
4	MOL000116	Nonanal	142.27	3.222	0	1	40.27634015	1.30729	1.50223	0.015196	17.06999969	6.35457
5	MOL000012	Arachic acid	312.6	8.192	1	2	16.65635621	1.17971	1.08582	0.19499	37.29999924	0
6	MOL000121	Decanal	156.3	3.678	0	1	29.80505997	1.33684	1.4357	0.020124	17.06999969	0
7	MOL001281	L-alpha-Palmitin	330.57	5.569	2	4	26.65999109	0.29798	-0.41829	0.22131	66.76000214	0
8	MOL000131	EIC	280.5	6.391	1	2	41.90443602	1.16206	0.90315	0.14347	37.29999924	7.497042
9	MOL001337	Benzyl glucopyranoside	270.31	-0.521	4	6	12.3948136	-0.70215	-1.03543	0.1428	99.37999725	0
10	MOL001387	(7aS)-4,4,7a-trimethyl-6,7-dihydro-5H-benzofuran-2-one	180.27	2.484	0	2	36.83663917	1.19886	1.46184	0.065044	26.29999924	14.047792
11	MOL001393	myristic acid	228.42	5.455	1	2	21.18117264	1.07113	0.99179	0.066784	37.29999924	0
12	MOL001396	PENTADECYLIC ACID	242.45	5.911	1	2	20.18459315	1.07931	0.88486	0.081479	37.29999924	0
13	MOL001398	Methyllinolenate	292.51	6.197	0	2	46.15300681	1.47695	1.09343	0.17063	26.29999924	5.947649
14	MOL001399	TWT	310.68	10.408	0	0	8.365694483	1.84833	1.63859	0.17997	0	0
15	MOL001402	Octacosane	394.86	13.145	0	0	8.146611389	1.91221	1.45871	0.36732	0	0
16	MOL001442	phytol	296.6	7.337	1	1	33.82439209	1.22963	0.84585	0.13342	20.22999954	2.339808
17	MOL001501	Daturic acid	270.51	6.824	1	2	18.51057885	1.12433	0.9472	0.11827	37.29999924	0
18	MOL001565	HEPTADECENE	238.51	7.736	0	0	20.03318493	1.83941	1.92019	0.076039	0	0
19	MOL001620	Pentadecene	210.45	6.824	0	0	17.72433705	1.84425	1.96534	0.050176	0	0
20	MOL001622	1-Tetradecene	196.42	6.368	0	0	6.148709854	1.84857	2.08661	0.04011	0	0
21	MOL001640	NON	172.3	3.63	1	2	26.73806656	0.9612	1.05836	0.027306	37.29999924	0
22	MOL001695	Quercimeritrin (6CI,7CI,8CI)	464.41	-0.401	8	12	2.848465738	-1.35955	-2.38409	0.79299	210.5099945	0
23	MOL001739	zoomaric acid	254.46	5.923	1	2	35.77585321	1.17781	0.88232	0.099334	37.29999924	5.290259
24	MOL001771	poriferast-5-en-3beta-ol	414.79	8.084	1	1	36.91390583	1.45001	1.14299	0.75034	20.22999954	5.066671
25	MOL001787	ADO	267.28	-2.02	5	8	15.98232655	-1.55714	-2.22199	0.17865	139.5399933	0
26	MOL001788	adenine	135.15	-0.581	3	4	62.80583588	-0.3046	-0.62629	0.034822	80.48000336	13.333959
27	MOL001801	salicylic acid	138.13	1.167	2	3	32.12698718	0.62617	0.63276	0.027213	57.52999878	12.0046
28	MOL001838	Dipalmitin	569.03	12.545	1	5	21.16264759	0.39403	-0.87727	0.44196	72.83000183	0
29	MOL001894	Bicetyl	450.98	14.97	0	0	8.034798688	1.96284	1.70919	0.46175	0	0
30	MOL001955	Heriguard	354.34	-0.416	6	9	11.93273511	-1.03385	-1.71492	0.32642	164.75	0
31	MOL002008	myricetin	318.25	1.236	6	8	13.74833165	-0.15458	-1.00744	0.31057	151.5899963	0
32	MOL002016	10579-93-8	204.39	4.753	0	0	27.35835622	1.8529	2.091	0.089902	0	0
33	MOL002046	hexanoic acid	116.18	1.806	1	2	73.07519787	0.796	0.9334	0.0090082	37.29999924	10.8053
34	MOL002092	Antioxidant No. 33	206.36	4.363	1	1	26.74299234	1.68237	1.81326	0.062536	20.22999954	0
35	MOL000222	terephthaldehyde	354.34	-0.416	6	9	11.93273511	-1.35129	-2.09162	0.32639	164.75	0
36	MOL000223	caffeic acid	180.17	1.367	3	4	25.76439804	0.21466	-0.25836	0.050089	77.76000214	0
37	MOL002363	beta-Ionone	192.33	3.215	0	1	20.63241193	1.4127	1.47147	0.054165	17.06999969	0
38	MOL002376	PENTACOSANE	352.77	11.777	0	0	8.249355127	1.89549	1.84953	0.27262	0	0
39	MOL000024	alpha-humulene	204.39	5.035	0	0	22.97682413	1.87788	2.07698	0.061124	0	0
40	MOL000249	Methylcinnamate	162.2	2.153	0	2	18.41747123	1.2975	1.30025	0.035378	26.29999924	0
41	MOL002674	(E)-1,3-Tridecadiene-5,7,9,11-tetrayne	164.21	4.179	0	0	37.30267702	2.4902	1.34612	0.03797	0	9.224146
42	MOL002675	Hexenal	98.16	1.83	0	1	46.01082283	1.28621	1.66066	0.0057353	17.06999969	11.3663
43	MOL002676	10482-53-8	232.45	6.403	0	0	44.05751523	1.87398	1.97688	0.07745	0	10.5958
44	MOL002677	L-1,2-Dipalmitin	569.03	12.545	1	5	21.28482089	0.37939	-0.86691	0.48761	72.83000183	0
45	MOL002678	EB	106.18	2.772	0	0	49.38328773	1.83479	2.15401	0.012997	0	11.7601
46	MOL002679	Ethone	148.23	1.609	0	3	40.81407893	0.96152	0.85573	0.015351	27.69000053	10.655292
47	MOL002680	Flavoxanthin	584.96	8.242	2	3	60.412944	0.96732	-0.89708	0.55609	49.68999863	16.37891
48	MOL002681	fluoranthene	202.26	3.945	0	0	24.70358597	1.96656	1.6701	0.18317	0	0
49	MOL002682	aldehydo-D-galactose	180.18	-2.684	5	6	47.81454198	-1.66661	-4.26137	0.034584	118.2200012	7.970654
50	MOL002683	Ligla	278.48	5.946	1	2	45.00906591	1.19865	0.69532	0.14562	37.29999924	5.972898
51	MOL002684	gamma-Tocotrienol	410.7	9.179	1	2	20.30486003	1.552	1.29789	0.53282	29.45999908	0
52	MOL002685	[(2S)-2,3-dihydroxypropyl] octanoate	218.33	1.919	2	4	22.27511732	0.06152	-0.36679	0.053548	66.76000214	0
53	MOL002686	GLV	74.04	-0.432	1	3	32.24556567	-0.19366	-0.33702	0.0038016	54.36999893	12.4216
54	MOL002687	guanosine	283.28	-2.411	6	9	21.42643906	-1.20569	-1.62329	0.20543	159.5099945	0
55	MOL002688	hentriacontane-8,10-diol	468.95	11.916	2	2	13.4112729	0.8092	-0.20072	0.49844	40.45999908	0
56	MOL002689	3,4,5-Trimethoxytoluene	182.24	2.267	0	3	23.7290308	1.31503	1.2474	0.044897	27.69000053	0
57	MOL002690	hydroxysafflor-yellow-A	612.59	-4.451	12	16	4.771764479	-2.76681	-3.38211	0.68407	295.3599854	0
58	MOL002691	Iva	102.15	1.145	1	2	62.16844434	0.81644	1.08754	0.0072034	37.29999924	11.3589
59	MOL002692	Amoenin A3	448.41	-0.32	7	11	3.321872811	-1.35508	-2.00951	0.73616	190.2799988	0
60	MOL002693	nicotiflorin	594.57	-1.178	9	15	3.637114724	-1.77125	-2.55121	0.72565	249.1999969	0
61	MOL002694	4-[(E)-4-(3,5-dimethoxy-4-oxo-1-cyclohexa-2,5-dienylidene)but-2-enylidene]-2,6-dimethoxycyclohexa-2,5-dien-1-one	356.4	0.361	0	6	48.46631493	0.8134	-0.33546	0.36494	71.05999756	3.238345
62	MOL002695	lignan	458.55	3.775	0	8	43.31815989	0.41883	-0.16185	0.65067	89.51999664	14.876724
63	MOL002696	lirioresinol-A	404.45	1.849	3	8	1.758891297	0.41303	-0.42498	0.67322	106.8399963	0
64	MOL002697	junipene	204.39	4.177	0	0	44.07374961	1.82262	2.14244	0.10826	0	12.197592
65	MOL002698	lupeol-palmitate	665.26	14.38	0	2	33.98364826	1.51508	0.88544	0.31954	26.29999924	10.211008
66	MOL002699	Cetene	224.48	7.28	0	0	5.338042166	1.8349	1.91326	0.062078	0	0
67	MOL002700	luteolin-7-0-B-D-glucoside	580.54	-1.246	9	15	3.717688517	-2.09775	-2.98908	0.75772	249.1999969	0
68	MOL002701	neocarthamin	450.43	0.126	7	11	17.81271011	-1.26908	-2.02024	0.77017	186.3699951	0
69	MOL002702	Nonacosanol	424.89	12.376	1	1	10.56939187	1.47999	0.69521	0.43365	20.22999954	0
70	MOL002703	OCTADECENE	252.54	8.193	0	0	19.20878962	1.8814	1.98408	0.092277	0	0
71	MOL002704	D-Phenylalanine	165.21	0.955	3	3	92.86028238	0.1808	0.13793	0.036064	63.31999969	4.784116
72	MOL002705	phospholipid	673.89	4.717	2	13	15.43156598	-0.72413	-1.377	0.44805	196.8800049	0
73	MOL002706	Phytoene	545.04	14.54	0	0	39.56307142	2.21502	1.70373	0.50463	0	2.000836
74	MOL002707	phytofluene	543.02	14.095	0	0	43.18172626	2.29331	1.75633	0.50316	0	2.595908
75	MOL002708	precarthamin	464.51	1.595	8	10	21.9998642	-1.39584	-1.98391	0.67405	180.3000031	0
76	MOL002709	propanetriol-a-arabinofuranosyl(1��4)	342.34	-4.333	8	11	0.870254745	-2.72302	-7.10226	0.23926	189.5299988	0
77	MOL002710	Pyrethrin II	372.5	3.741	0	5	48.35707237	0.53038	-0.21269	0.35025	69.66999817	1.791351
78	MOL002711	ZINC01692449	86.15	1.16	1	1	72.18218096	1.08354	1.36605	0.0045211	20.22999954	11.5404
79	MOL002712	6-Hydroxykaempferol	302.25	1.504	5	7	62.1326676	0.16168	-0.71261	0.27266	131.3600006	14.289048
80	MOL002713	qt_Kaempferol-3-O-rutinoside-7-O-galactoside	624.6	-1.986	9	16	14.27512764	-1.99908	-2.92395	0.62527	266.269989	0
81	MOL002714	baicalein	270.25	2.334	3	5	33.51891869	0.63086	-0.05023	0.20888	90.90000153	16.249167
82	MOL002715	qt_carthamin-precursor	660.62	0.535	9	14	6.832096627	-2.03731	-2.51331	0.55452	267.4200134	0
83	MOL002716	qt_carthamin	620.55	0.068	9	14	6.749987988	-2.35022	-2.72846	0.5994	267.4200134	0
84	MOL002717	qt_carthamone	286.25	0.697	3	6	51.02582086	-0.31077	-0.91732	0.20055	111.9000015	3.638561
85	MOL002718	qt_hydroxysafflor-yellow-A	288.27	0.45	4	6	13.02236908	-0.42928	-0.86252	0.19814	115.0599976	0
86	MOL002719	6-Hydroxynaringenin	288.27	2.03	4	6	33.22920875	0.27121	-0.27187	0.24203	107.2200012	15.66654
87	MOL002720	qt_precarthamin	316.38	3.171	5	5	17.47873508	-0.02356	-0.55917	0.23628	101.1500015	0
88	MOL002721	quercetagetin	318.25	1.236	6	8	45.00699322	-0.0593	-0.93341	0.30991	151.5899963	13.822025
89	MOL002722	Vomifoliol	224.33	1.251	2	3	29.01415989	-0.08039	-0.52295	0.08234	57.52999878	0
90	MOL002723	qt_safflomin-A	288.27	0.45	4	6	5.847025663	-0.50079	-1.03632	0.19812	115.0599976	0
91	MOL002724	qt_safflomin-C	452.44	1.522	6	9	3.528710258	-0.84984	-1.38252	0.59242	172.5899963	0
92	MOL002725	qt_safflow-yellow-A	448.41	-1.949	7	11	16.06608277	-2.14288	-2.45807	0.78839	194.2100067	0
93	MOL002726	qt_safflower-yellow-B	766.76	-1.574	13	17	9.468212577	-3.16296	-3.47164	0.41476	331.269989	0
94	MOL002727	C08464	162.19	4.302	0	0	37.14154796	2.53099	0.60594	0.039062	0	9.512038
95	MOL002728	sesquiterpene	626.57	-2.492	11	17	5.855136174	-2.92964	-3.98757	0.66886	289.6600037	0
96	MOL002729	quercetin-6-glucoside	480.41	-0.668	9	13	16.7471149	-1.57944	-2.75382	0.80252	230.7400055	0
97	MOL002730	Vitamin- G	376.41	0.225	5	10	6.788112011	-1.22119	-1.76878	0.49961	161.5599976	0
98	MOL002731	(4S)-4-hydroxy-3,5,5-trimethyl-4-[(E,3R)-3-[(2R,3R,4S,5S,6R)-3,4,5-trihydroxy-6-(hydroxymethyl)tetrahydropyran-2-yl]oxybut-1-enyl]cyclohex-2-en-1-one	386.49	-0.496	5	8	10.80936047	-1.253	-1.82171	0.36406	136.6799927	0
99	MOL002732	7-Chloro-2,4-quinolinedicarboxylic acid	166.23	4.056	0	0	33.32345323	2.26675	1.20543	0.03715	0	9.040538
100	MOL002733	safflomin-A	612.59	-4.451	12	16	3.531717847	-3.032	-3.6422	0.68407	295.3599854	0
101	MOL002734	safflomin-C	614.6	-0.948	10	14	5.570023148	-2.01194	-2.43519	0.65883	262.7399902	0
102	MOL002735	safflow-yellow-A	610.57	-3.695	10	16	27.16376721	-2.89753	-3.37	0.69945	273.3599854	0
103	MOL002736	safflower-yellow-B	1091.07	-6.8	21	27	3.013720692	-4.19529	-4.74481	0.16728	511.5700073	0
104	MOL002737	scutellarein	286.25	2.067	4	6	18.97361133	0.30767	-0.53731	0.24387	111.1299973	0
105	MOL002738	Diamylphenol	234.42	6.185	1	1	17.25559742	1.727	1.66453	0.079682	20.22999954	0
106	MOL002739	tagetiin	480.41	-0.854	9	13	28.34131519	-1.41209	-2.15193	0.78102	230.7400055	0
107	MOL002740	thymopentin	679.88	-1.322	15	18	1.237474334	-1.91178	-2.90946	0.45921	327.6700134	0
108	MOL002741	tinctorimine	595.56	-4.329	13	16	18.08881012	-3.15069	-3.51884	0.68271	298.1600037	0
109	MOL002742	LUT	568.96	9.465	2	2	15.74236581	1.11599	-1.11644	0.5393	40.45999908	0
110	MOL002743	ZINC01666986	102.2	1.804	1	1	43.93999468	1.11403	1.29185	0.0059229	20.22999954	10.819692
111	MOL002744	(R)-2-methylbutyric acid	102.15	1.356	1	2	28.85559275	0.75829	1.05757	0.0079662	37.29999924	0
112	MOL002745	ZINC01690417	102.2	1.872	1	1	80.12167132	1.19698	1.50229	0.006186	20.22999954	10.8842
113	MOL002746	L-2-Amino-3-(5-hydroxyindolyl)propionic acid	220.25	0.981	5	4	74.62940859	-0.15471	-0.6915	0.097646	99.33999634	-2.655037
114	MOL002747	(2R)-5-methylhexan-2-ol	116.23	2.056	1	1	23.59717428	1.10857	1.20376	0.0087234	20.22999954	0
115	MOL002748	(2R,6R,10R)-6,10,14-trimethylpentadecan-2-ol	270.56	6.666	1	1	20.9391959	1.33488	1.12273	0.095616	20.22999954	0
116	MOL002749	6-hydroxykaempferol-3,6,7-tri-O-beta-D-glucoside	788.73	-4.396	14	22	3.141586341	-3.91164	-5.03073	0.38743	368.8099976	0
117	MOL002750	2,4-Dichloro-5-([(E)-(4-chlorophenyl)methylidene]amino)benzoic acid	168.25	3.934	0	0	36.61929678	2.1887	1.72329	0.036045	0	8.657654
118	MOL002751	6-hydroxykaempferol-3-O-beta-D-glucoside	464.41	-0.587	8	12	1.849430434	-1.51986	-2.30505	0.75633	210.5099945	0
119	MOL002752	6-hydroxykaempferol-3-O-beta-d-Rutoside-6-O-beta-d-glucoside	788.73	-4.409	14	22	3.02265096	-3.72749	-5.1443	0.33599	376.6499939	0
120	MOL002753	6-hydroxykaempferol-3-O-glucoside	464.41	-0.587	8	12	1.968049421	-1.47123	-2.14308	0.75634	210.5099945	0
121	MOL002754	6-hydroxykaempferol-3,6-di-O-beta-D-glucoside	626.57	-2.492	11	17	4.20794447	-2.85987	-3.77303	0.68149	289.6600037	0
122	MOL002755	6-hydroxykaempferol-6,7-di-O-beta-D-glucoside	626.57	-2.305	11	17	12.77467912	-2.49044	-3.56816	0.6854	289.6600037	0
123	MOL002756	6-Hydroxykaempferol-7-O-glucoside	464.41	-0.401	8	12	2.865602847	-1.46915	-2.55078	0.77743	210.5099945	0
124	MOL002757	7,8-dimethyl-1H-pyrimido[5,6-g]quinoxaline-2,4-dione	242.26	0.594	2	6	45.75093773	0.05727	-0.66956	0.18605	91.5	-0.717427
125	MOL002758	(E,Z)-2,8-Decadien-4,6-diyn-1-yl 3-methylbutanoate	230.33	4.064	0	2	26.60173728	1.649	0.82929	0.083295	26.29999924	0
126	MOL002759	Glyceryl pps	663.15	14.492	0	6	29.61351777	0.44927	-0.77927	0.35376	78.90000153	0
127	MOL002760	Hydroxybenzoyl-coumaricanhydride	456.42	4.166	3	8	1.680753406	-0.46093	-1.00769	0.77666	138.1999969	0
128	MOL002761	Sophoraflavonoloside	610.57	-2.067	10	16	5.29823235	-2.42307	-3.27198	0.70802	269.4299927	0
129	MOL002762	Kaempferol-3-O-beta-d-rutinoside	610.57	-2.237	10	16	5.513647535	-2.58503	-3.38685	0.64626	277.269989	0
130	MOL002763	Kaempferol-3-O-rutinoside-7-O-galactoside	772.73	-4.142	13	21	3.046084874	-3.38734	-4.93448	0.33752	356.4200134	0
131	MOL002764	MEGxp0_000365	583.74	4.263	5	9	1.449813035	-0.11604	-1.81116	0.53248	139.1999969	0
132	MOL002765	N1,N5-(Z)-N10-(E)-tri-p-coumaroylspermidine	583.74	4.263	5	9	1.449813035	-0.13603	-1.35212	0.53163	139.1999969	0
133	MOL002766	Quercetin-3,7-di-O-beta-d-glucoside	626.57	-2.492	11	17	5.855136174	-2.57338	-3.73672	0.66864	289.6600037	0
134	MOL002767	1,11(Z)-Tridecadien-3,5,7,9-tetrayne	164.21	4.179	0	0	43.51109371	2.40439	1.3319	0.037723	0	9.231962
135	MOL002768	947-59-1	204.39	4.169	0	0	29.59443138	1.83858	2.12181	0.12401	0	0
136	MOL002769	(Z)-2-methyl-5-[(1R,2S,4S)-2-methyl-3-methylene-2-norbornanyl]pent-2-en-1-ol	220.39	3.663	1	1	62.84778846	1.264	1.2238	0.088179	20.22999954	1.460593
137	MOL002770	Terthiophene	248.41	5.018	0	0	19.56050217	1.45949	1.28026	0.074543	84.72000122	0
138	MOL002771	VIV	430.79	10.416	1	2	14.26461321	1.69882	1.66698	0.55443	29.45999908	0
139	MOL002772	[(Z)-dec-8-en-4,6-diynyl] 3-methylbutanoate	232.35	4.373	0	2	27.81954355	1.56404	0.79832	0.082062	26.29999924	0
140	MOL002773	beta-carotene	536.96	11.999	0	0	37.18433337	2.25156	1.52266	0.58358	0	4.357938
141	MOL002774	Sitoindoside II	841.45	13.782	3	7	26.94201043	0.11779	-1.40476	0.16047	105.4499969	0
142	MOL002775	5,8-dimethyltocol	416.76	9.929	1	2	15.621042	1.67023	1.55684	0.52106	29.45999908	0
143	MOL002776	Baicalin	446.39	0.639	6	11	40.12360996	-0.84777	-1.74426	0.75264	187.1199951	17.358993
144	MOL002777	124604-44-0	166.23	4.056	0	0	41.56808333	2.28932	1.54312	0.036727	0	9.090862
145	MOL002778	THZ	135.2	1.914	0	1	70.3331389	1.3869	1.51229	0.025246	41.13000107	13.387429
146	MOL002779	carthamin-precursor	984.94	-4.691	17	24	3.014504941	-4.83869	-5.4986	0.20756	447.7200012	0
147	MOL002780	carthamin	944.87	-3.426	15	24	3.015337994	-4.26314	-4.92468	0.22185	425.7200012	0
148	MOL002781	carthamone	448.41	-1.394	6	11	5.926891815	-1.80539	-2.42873	0.62722	191.0500031	0
149	MOL002782	Dihydroaplotaxene	234.47	6.847	0	0	4.779626936	1.90413	2.13025	0.076188	0	0
150	MOL002783	Cumalic acid	140.1	-0.112	1	4	43.09828612	-0.01107	-0.38589	0.028014	67.51000214	11.8641
151	MOL002784	CYCLODODECANOL	184.36	4.238	1	1	41.44956718	1.20509	1.25002	0.042651	20.22999954	8.578516
152	MOL002785	deca-4,6-diynyl 3-methylbutanoate	234.37	4.818	0	2	20.6871184	1.58835	0.85931	0.080311	26.29999924	0
153	MOL000286	��-amyrin acetate	468.84	7.683	0	2	9.107391374	1.42203	1.20816	0.74014	26.29999924	0
154	MOL000305	lauric acid	200.36	4.543	1	2	23.58793922	1.02187	1.09656	0.043637	37.29999924	0
155	MOL000340	HCI	150.19	1.925	1	2	35.83191342	0.91894	0.99013	0.028973	37.29999924	5.676132
156	MOL000346	succinic acid	118.1	-0.41	2	4	29.62033732	-0.44496	-0.70993	0.012082	74.59999847	0
157	MOL000347	Syrigin	372.41	-0.511	5	9	14.63693014	-1.00503	-1.8091	0.32496	138.0700073	0
158	MOL000348	4-[(Z)-3-hydroxyprop-1-enyl]-2,6-dimethoxyphenol	210.25	1.393	2	4	49.14733802	0.56475	0.02511	0.064947	58.91999817	3.88314
159	MOL000356	lupeol	426.8	7.403	1	1	12.12076413	1.45673	1.28834	0.77716	20.22999954	0
160	MOL000357	Sitogluside	576.95	6.337	4	6	20.63193686	-0.1362	-0.9283	0.6241	99.37999725	0
161	MOL000358	beta-sitosterol	414.79	8.084	1	1	36.91390583	1.32463	0.98588	0.75123	20.22999954	5.355491
162	MOL000036	beta-caryophyllene	204.39	4.753	0	0	29.70229451	1.82766	2.06535	0.089893	0	0
163	MOL000360	FER	194.2	1.618	2	4	39.55851681	0.4703	-0.03311	0.058069	66.76000214	2.378545
164	MOL000382	Arabinose,d	150.15	-2.173	4	5	1.87147918	-1.5911	-3.98447	0.022118	97.98999786	0
165	MOL000396	(+)-Syringaresinol	418.48	2.1	2	8	3.291713283	0.46855	-0.33652	0.72244	95.83999634	0
166	MOL000415	rutin	610.57	-1.446	10	16	3.201533128	-1.92581	-2.75317	0.68283	269.4299927	0
167	MOL000422	kaempferol	286.25	1.771	4	6	41.88224954	0.26096	-0.55335	0.24066	111.1299973	14.743371
168	MOL000432	linolenic acid	278.48	5.946	1	2	45.00906591	1.20965	0.83697	0.14709	37.29999924	5.53627
169	MOL000449	Stigmasterol	412.77	7.64	1	1	43.82985158	1.44458	1.00045	0.75665	20.22999954	5.574595
170	MOL000479	Farnesene	204.39	5.515	0	0	17.41806873	1.95385	2.20961	0.047569	0	0
171	MOL000514	Nonacosane	408.89	13.601	0	0	8.124095127	1.92388	1.54024	0.39372	0	0
172	MOL002003	(-)-Caryophyllene oxide	220.39	3.519	0	1	32.67006511	1.57777	1.76492	0.12925	12.52999973	6.50957
173	MOL000055	L-Lysin	146.22	-0.68	5	4	29.33256218	-0.66241	-1.44013	0.018179	89.33999634	0
174	MOL000561	Astragalin	448.41	-0.32	7	11	14.02684507	-1.33598	-1.969	0.73616	190.2799988	0
175	MOL000006	luteolin	286.25	2.067	4	6	36.16262934	0.185	-0.84349	0.24552	111.1299973	15.944492
176	MOL000608	()-Terpinen-4-ol	154.28	2.55	1	1	81.40667188	1.36161	1.66275	0.032323	20.22999954	10.805992
177	MOL000612	(-)-alpha-cedrene	204.39	4.123	0	0	55.56099313	1.80954	2.16397	0.10498	0	4.82374
178	MOL000675	oleic acid	282.52	6.835	1	2	33.12836481	1.16896	0.77767	0.14243	37.29999924	4.986206
179	MOL000069	palmitic acid	256.48	6.368	1	2	19.2965647	1.09151	0.99862	0.098573	37.29999924	0
180	MOL000714	Hyacinthin	120.16	1.517	0	1	38.64648502	1.30517	1.58238	0.017812	17.06999969	-2.04432
181	MOL000723	trans-2,4-decadienal	152.26	3.21	0	1	51.02817074	1.40425	1.49359	0.020894	17.06999969	7.438984
182	MOL000748	HMF	126.12	0.672	1	3	45.06610249	0.05326	-0.26608	0.019427	50.43999863	11.7281
183	MOL000767	Dotriacontanol	466.98	13.744	1	1	10.2451896	1.4791	0.43872	0.45938	20.22999954	0
184	MOL000775	EEE	88.12	0.37	0	2	45.0163211	1.06595	1.25978	0.0045272	26.29999924	11.6434
185	MOL000008	apigenin	270.25	2.334	3	5	23.06216102	0.4256	-0.6109	0.21306	90.90000153	0
186	MOL000860	stearic acid	284.54	7.28	1	2	17.82542938	1.14557	1.22356	0.14086	37.29999924	0
187	MOL000089	catechol	110.12	1.295	2	2	29.86070108	1.08575	1.32074	0.01616	40.45999908	0
188	MOL000953	CLR	386.73	7.376	1	1	37.87389754	1.43101	1.12678	0.67677	20.22999954	4.518834
189	MOL000098	quercetin	302.25	1.504	5	7	46.43334812	0.04842	-0.7689	0.27525	131.3600006	14.400548
