# Supplementary material for: Flos Carthami Exerts Hepatoprotective Action in a Rat Model of Alcoholic Liver Injury via Modulating the Metabolomics Profile
Source: Evid Based Complement Alternat Med. 2022 May 2;2022:8158699. doi: 10.1155/2022/8158699 (PMC9085312; doi:10.1155/2022/8158699)
Supplement: Supplementary Materials — Additional Figure S1. Enrichment analysis of metabolites differentially expressed between the CG and MG. Additional Figure S2. Enrichment analysis of metabolites differentially expressed between the FC and MG. Additional Figure S3. Metabolite interaction network of FC-responsive metabolites in alcoholic liver injury. Additional File S1. List of ingredients in FC as reported in TCMSP. Additional File S2. List of metabolites differentially expressed between the CG and MG. Additional File S3. List of metabolites differentially expressed between the FC and MG. Additional File S4. List of FC-responsive metabolites in alcoholic liver injury. Additional File S5. Pearson correlation of FC-responsive metabolites in alcoholic liver injury. [file 8158699.f1.zip › 8158699.f1/Additional File S2 (1).txt]

	logFC	AveExpr	t	P.Value	adj.P.Val	B	threshold
DG(20:2(11Z,14Z)/20:3(5Z,8Z,11Z)/0:0)	-1.812461016	6.802642742	-15.93015937	3.31E-11	3.91E-08	16.05115996	down
Natamycin	0.981244985	6.00384664	15.82690501	3.65E-11	3.91E-08	15.95983794	up
Amitriptyline	-3.485947407	6.11362127	-15.40712806	5.47E-11	4.39E-08	15.57048251	down
Trihexosylceramide (d18:1/12:0)	2.059880972	5.512557437	15.0779827	7.56E-11	4.85E-08	15.24740179	up
PC(14:1(9Z)/18:1(11Z))	-1.514792846	4.641375312	-14.08127996	2.09E-10	9.59E-08	14.23750509	down
Bendroflumethiazide	-3.243147274	3.789835567	-14.41900946	1.47E-10	7.87E-08	14.1677234	down
Dihydroergotamine	-3.540267212	5.217950462	-13.49709821	3.91E-10	1.49E-07	13.61011807	down
5C-aglycone	-2.274360616	6.353678082	-13.43838425	4.17E-10	1.49E-07	13.51183259	down
Ganglioside GM2 (d18:1/26:0)	-4.232842346	5.053593477	-13.26356464	5.05E-10	1.62E-07	13.29855366	down
CE(18:1(11Z))	1.701405713	4.858663183	13.0799476	6.19E-10	1.64E-07	13.15915552	up
Corticosterone	-2.596207074	4.342690272	-13.10739448	6.01E-10	1.64E-07	13.14196149	down
TG(16:0/18:2(9Z,12Z)/20:0)	1.106019325	5.346453926	12.9921014	6.84E-10	1.64E-07	13.03159011	up
TG(16:1(9Z)/20:0/20:0)	-2.322465004	7.179903042	-12.95024403	7.17E-10	1.64E-07	12.92179568	down
Ceftazidime	-5.729939345	1.514502242	-16.07277447	2.90E-11	3.91E-08	12.91515031	down
DG(20:4(5Z,8Z,11Z,14Z)/20:3(8Z,11Z,14Z)/0:0)	1.598971397	5.235043149	12.71585261	9.36E-10	2.00E-07	12.72437441	up
PE(16:1(9Z)/20:0)	-1.065189923	7.780731608	-12.53019464	1.16E-09	2.10E-07	12.40645261	down
O-Desmethylangolensin	1.970818093	7.429334019	12.51649262	1.18E-09	2.10E-07	12.39792763	up
Cer(d18:1/18:1(9Z))	-4.613961413	3.96775097	-12.61445408	1.05E-09	2.10E-07	12.24437016	down
PC(16:1(9Z)/22:4(7Z,10Z,13Z,16Z))	2.261024351	4.454357535	12.26692684	1.58E-09	2.62E-07	12.24134357	up
Cevimeline	0.704112373	8.345524342	12.2394268	1.63E-09	2.62E-07	12.05376834	up
gamma-Glutamylalanine	-1.669006077	4.299174904	-12.06130414	2.01E-09	2.94E-07	11.99916589	down
PE(18:4(6Z,9Z,12Z,15Z)/22:1(13Z))	0.958433995	4.734111039	11.99739764	2.18E-09	3.04E-07	11.89763676	up
13,14-Dihydro PGE1	-2.819367379	4.481814981	-11.71765719	3.06E-09	3.77E-07	11.58021926	down
DG(18:3(9Z,12Z,15Z)/18:0/0:0)	-2.843643063	3.309604766	-11.74611335	2.95E-09	3.77E-07	11.37963749	down
Tetrahydrocurcumin	-4.381523646	3.10316679	-12.1259124	1.87E-09	2.85E-07	11.3640328	down
PI(18:3(9Z,12Z,15Z)/18:1(9Z))	-4.305979552	3.835454277	-11.74870385	2.94E-09	3.77E-07	11.3417728	down
DG(20:5(5Z,8Z,11Z,14Z,17Z)/18:1(11Z)/0:0)	1.364658196	3.346075202	11.5106381	3.94E-09	4.37E-07	11.28079775	up
DG(18:1(9Z)/20:2(11Z,14Z)/0:0)	-2.109416408	7.097378347	-11.56331189	3.70E-09	4.37E-07	11.24025357	down
GlcCer(d18:1/16:0)	-1.98425779	8.541990445	-11.51775801	3.91E-09	4.37E-07	11.15439367	down
Cer(d18:1/25:0)	1.693562355	3.890146375	11.17962601	5.98E-09	5.85E-07	10.92466654	up
PC(20:0/22:4(7Z,10Z,13Z,16Z))	-0.754544459	5.096066861	-11.21387574	5.73E-09	5.85E-07	10.89285578	down
PC(20:4(8Z,11Z,14Z,17Z)/18:2(9Z,12Z))	0.721758583	8.758453411	11.27967196	5.27E-09	5.64E-07	10.8426189	up
PI(18:1(9Z)/16:1(9Z))	0.903182299	6.378997052	11.15200469	6.20E-09	5.85E-07	10.71223509	up
DG(18:3(6Z,9Z,12Z)/14:0/0:0)	0.71869251	8.577974326	11.17193146	6.04E-09	5.85E-07	10.70254103	up
PC(22:6(4Z,7Z,10Z,13Z,16Z,19Z)/P-16:0)	1.603884021	3.186227034	11.00040911	7.53E-09	6.53E-07	10.6307067	up
PC(18:3(6Z,9Z,12Z)/20:3(8Z,11Z,14Z))	-1.43909764	7.619797637	-11.09866078	6.63E-09	6.09E-07	10.6139321	down
PC(14:0/20:4(8Z,11Z,14Z,17Z))	2.62389345	3.322229861	10.87773933	8.82E-09	7.45E-07	10.44633887	up
DG(20:4(5Z,8Z,11Z,14Z)/18:1(11Z)/0:0)	-1.144339518	3.813401342	-10.72917016	1.07E-08	8.60E-07	10.35353295	down
PI(18:3(6Z,9Z,12Z)/22:3(10Z,13Z,16Z))	-1.622121713	4.331324432	-10.73468727	1.06E-08	8.60E-07	10.35322508	down
Neolactotetraose	-2.257617264	6.474550577	-10.66863103	1.16E-08	8.87E-07	10.10774326	down
PC(22:2(13Z,16Z)/18:0)	0.817821885	7.327618648	10.67866664	1.14E-08	8.87E-07	10.05337105	up
PC(16:1(9Z)/14:1(9Z))	-1.026028482	11.57190712	-10.47554343	1.50E-08	1.12E-06	9.700481481	down
PE(18:1(11Z)/20:0)	-2.461226002	2.937001524	-10.3242022	1.84E-08	1.34E-06	9.658287495	down
DG(14:0/18:3(6Z,9Z,12Z)/0:0)	-1.605551603	8.620879331	-10.20604787	2.16E-08	1.54E-06	9.392156617	down
PC(22:4(7Z,10Z,13Z,16Z)/20:1(11Z))	1.002774968	4.721125072	10.05897182	2.64E-08	1.80E-06	9.371967305	up
CE(14:0)	-0.989349413	5.511283848	-10.07382146	2.59E-08	1.80E-06	9.319897087	down
PE(18:1(9Z)/20:1(11Z))	-2.160055205	4.188476376	-9.855967132	3.50E-08	2.30E-06	9.186027795	down
PC(24:1(15Z)/18:1(11Z))	-2.999566221	0.62573564	-11.06067258	6.96E-09	6.21E-07	9.108560964	down
15-Deoxy-d-12,14-PGJ2	-1.436360878	5.231517633	-9.8732807	3.42E-08	2.29E-06	9.070004575	down
Meprobamate	-3.85952416	4.583133693	-9.706707981	4.32E-08	2.67E-06	8.983382615	down
(9E,11E)-Octadecadienoic acid	1.38896483	5.350838444	9.768735277	3.96E-08	2.52E-06	8.898074655	up
PC(22:0/P-18:1(11Z))	1.323202709	3.711928633	9.580585103	5.17E-08	3.13E-06	8.802131617	up
PC(20:3(5Z,8Z,11Z)/P-18:1(9Z))	0.69421246	6.528070706	9.762063968	4.00E-08	2.52E-06	8.782130293	up
PC(24:0/16:1(9Z))	1.361750289	3.661308928	9.548664747	5.41E-08	3.16E-06	8.759480632	up
Terephthalic acid	1.346884178	3.727096581	9.451285796	6.23E-08	3.33E-06	8.617551532	up
PE(18:1(11Z)/22:4(7Z,10Z,13Z,16Z))	0.894830403	4.937997748	9.547858666	5.42E-08	3.16E-06	8.614677576	up
DG(22:1(13Z)/18:4(6Z,9Z,12Z,15Z)/0:0)	1.5040252	4.603597702	9.498268184	5.82E-08	3.28E-06	8.595990733	up
Pregnanetriol	-1.60942637	8.467257943	-9.51738267	5.66E-08	3.25E-06	8.395877154	down
Raffinose	-1.109257891	4.175607071	-9.322316722	7.51E-08	3.83E-06	8.395128351	down
DG(16:0/20:1(11Z)/0:0)	0.970447028	4.667484608	9.3495581	7.22E-08	3.74E-06	8.353927151	up
PC(22:5(7Z,10Z,13Z,16Z,19Z)/18:1(9Z))	-1.062805323	7.098907566	-9.469503067	6.07E-08	3.33E-06	8.341443904	down
PC(18:0/22:2(13Z,16Z))	1.194589194	3.816458948	9.260736343	8.22E-08	4.00E-06	8.332272873	up
GlcCer(d18:1/18:0)	1.242547636	5.13199594	9.352667152	7.19E-08	3.74E-06	8.308133747	up
1-hydroxyoct-7-enoylglycine	0.954706445	8.913778763	9.460397879	6.15E-08	3.33E-06	8.304881038	up
Nabilone	1.601459285	5.290392779	9.290224885	7.87E-08	3.91E-06	8.204197844	up
Ercalcitriol	-1.510489352	4.78687535	-9.221128418	8.71E-08	4.17E-06	8.175558742	down
Mirtazapine	-4.075943755	3.977633088	-9.119718862	1.01E-07	4.71E-06	8.126022761	down
Triiodothyronine sulfate	0.735400859	6.228242256	9.286374597	7.91E-08	3.91E-06	8.094141444	up
PC(22:5(4Z,7Z,10Z,13Z,16Z)/P-16:0)	1.763428033	2.459028954	9.08043896	1.07E-07	4.85E-06	7.991248235	up
5'-Hydroxypiroxicam	-1.585248704	5.147800219	-9.082855057	1.07E-07	4.85E-06	7.919141268	down
PI(20:4(5Z,8Z,11Z,14Z)/18:0)	-2.057444695	4.810198385	-9.032521529	1.15E-07	5.11E-06	7.919012441	down
CL(i-14:0/i-17:0/a-17:0/i-13:0)[rac]	-2.986246471	4.86781519	-8.995483273	1.22E-07	5.28E-06	7.913975064	down
PC(14:0/18:2(9Z,12Z))	-1.00748667	9.836177236	-9.164251129	9.47E-08	4.47E-06	7.845280059	down
2-Pentanamido-3-phenylpropanoic acid	-3.109099264	3.999190989	-8.851313093	1.51E-07	5.99E-06	7.758947023	down
Lovastatin	-1.745532686	6.162603789	-9.026987372	1.16E-07	5.11E-06	7.742701957	down
Leukotriene F4	0.878413434	4.812736184	8.90369965	1.40E-07	5.82E-06	7.661285492	up
Dihydrogenistein	1.454718565	4.672023294	8.872060876	1.46E-07	5.95E-06	7.645346136	up
PC(20:5(5Z,8Z,11Z,14Z,17Z)/16:1(9Z))	1.187023247	4.458783275	8.853734493	1.51E-07	5.99E-06	7.638778172	up
PE(18:3(6Z,9Z,12Z)/22:1(13Z))	2.015917245	3.802060647	8.711607573	1.87E-07	6.83E-06	7.53624575	up
PC(18:0/24:1(15Z))	-0.776172352	7.511605062	-8.884762666	1.44E-07	5.92E-06	7.437477887	down
Linoelaidylcarnitine	-3.619335735	2.03444139	-8.914403163	1.37E-07	5.81E-06	7.422927461	down
PC(16:0/18:1(11Z))	1.472920003	4.78881916	8.736874345	1.80E-07	6.83E-06	7.419023414	up
Quercetin	1.043379096	4.484994557	8.701783421	1.90E-07	6.83E-06	7.394759834	up
DG(18:4(6Z,9Z,12Z,15Z)/18:1(11Z)/0:0)	0.809207734	5.420283491	8.77298948	1.70E-07	6.67E-06	7.386568177	up
DG(22:1(13Z)/14:1(9Z)/0:0)	-2.848397851	4.213239345	-8.581273086	2.28E-07	7.97E-06	7.342719203	down
5-Hydroxyfluvastatin	-1.45615827	5.320394766	-8.707072398	1.88E-07	6.83E-06	7.313472603	down
PE(20:1(11Z)/18:1(9Z))	-1.820927151	3.869464402	-8.530453	2.47E-07	8.44E-06	7.259801126	down
DG(20:1(11Z)/20:4(8Z,11Z,14Z,17Z)/0:0)	1.122328159	7.636827374	8.735136174	1.80E-07	6.83E-06	7.201057063	up
Methotrexate	-5.903633334	1.194378538	-8.940167523	1.32E-07	5.66E-06	7.17674771	down
N-Dealkylated tolterodine	0.547697937	8.775530591	8.72243377	1.84E-07	6.83E-06	7.170225741	up
Voriconazole	0.775344224	6.701244056	8.700943599	1.90E-07	6.83E-06	7.164146368	up
1,2-octadienoylglycine	-1.039461906	5.816423909	-8.648961646	2.06E-07	7.26E-06	7.162144929	down
Ganglioside GM3 (d18:1/24:1(15Z))	-1.020379858	11.71858965	-8.696420168	1.91E-07	6.83E-06	7.053718982	down
Pyridoxal	1.611086366	3.499544483	8.387953135	3.08E-07	1.02E-05	7.051214854	up
PI(18:1(11Z)/20:3(5Z,8Z,11Z))	-1.43324769	4.139651059	-8.409604793	2.98E-07	9.97E-06	7.025973389	down
PC(20:3(8Z,11Z,14Z)/22:2(13Z,16Z))	0.744937697	5.768218847	8.540399278	2.43E-07	8.40E-06	6.978083102	up
PC(20:1(11Z)/20:3(5Z,8Z,11Z))	-1.618084759	5.708631937	-8.440666208	2.84E-07	9.60E-06	6.85613095	down
DG(18:1(11Z)/20:3(5Z,8Z,11Z)/0:0)	0.678600224	3.86411028	8.259165237	3.78E-07	1.23E-05	6.781400557	up
PC(18:0/18:2(9Z,12Z))	-0.86457609	5.784493084	-8.354462768	3.25E-07	1.07E-05	6.689480207	down
PE(14:0/18:0)	-1.408881884	3.723083453	-8.15442442	4.46E-07	1.38E-05	6.670925356	down
PC(24:1(15Z)/P-18:1(11Z))	0.734535967	3.777570347	8.137914603	4.58E-07	1.39E-05	6.602389631	up
PC(P-18:0/20:3(5Z,8Z,11Z))	-1.125812859	5.723434416	-8.220519013	4.02E-07	1.26E-05	6.484390333	down
PE(20:1(11Z)/16:1(9Z))	-1.74772729	4.554808593	-8.082408869	5.01E-07	1.48E-05	6.451146464	down
Propofol	0.860712873	6.242266921	8.21181783	4.07E-07	1.27E-05	6.402690255	up
Dexrazoxane	0.481644216	8.065464374	8.232951459	3.94E-07	1.26E-05	6.390302709	non
PC(P-18:1(11Z)/16:1(9Z))	0.847760837	7.964548165	8.2237609	4.00E-07	1.26E-05	6.375204096	up
Mexiletine	0.503898218	7.267197997	8.149186652	4.50E-07	1.38E-05	6.257194992	up
5-hydroxyoct-4-enoylglycine	-3.223366099	3.637744465	-7.845603254	7.35E-07	1.98E-05	6.219212517	down
TG(22:5(7Z,10Z,13Z,16Z,19Z)/18:2(9Z,12Z)/22:6(4Z,7Z,10Z,13Z,16Z,19Z))	-1.004428523	6.15992317	-8.082515775	5.01E-07	1.48E-05	6.209580672	down
DL-O-Phosphoserine	-1.162803084	4.303264508	-7.925404064	6.45E-07	1.83E-05	6.204439457	down
DG(20:4(5Z,8Z,11Z,14Z)/20:0/0:0)	-1.000798306	3.24035427	-7.796049887	7.97E-07	2.10E-05	6.127467278	down
4-Hydroxy tolbutamide	-0.939999075	10.27209185	-8.087266365	4.97E-07	1.48E-05	6.118561016	down
PC(18:2(9Z,12Z)/20:3(5Z,8Z,11Z))	-1.325051309	6.884422172	-8.032918346	5.42E-07	1.56E-05	6.088468683	down
PC(18:2(9Z,12Z)/P-18:0)	-0.596139034	7.541635387	-8.030388201	5.45E-07	1.56E-05	6.058827188	down
PE(16:0/22:1(13Z))	-0.824731592	8.653143714	-8.033094007	5.42E-07	1.56E-05	6.055364654	down
TG(16:1(9Z)/18:2(9Z,12Z)/18:2(9Z,12Z))	-2.036922364	5.553187627	-7.922071297	6.49E-07	1.83E-05	6.037874433	down
3,4-Dihydroxybenzeneacetic acid	0.791323648	3.335206127	7.71850788	9.06E-07	2.27E-05	5.984260072	up
PE(18:1(11Z)/18:1(9Z))	3.308102338	1.54668874	7.865886817	7.11E-07	1.95E-05	5.926082339	up
Maltotetraose	-0.882685194	5.285354701	-7.855134332	7.24E-07	1.97E-05	5.91934802	down
PE(16:0/20:4(8Z,11Z,14Z,17Z))	0.714619486	4.163131182	7.714996015	9.11E-07	2.27E-05	5.837758469	up
PI(22:2(13Z,16Z)/16:0)	0.685818766	9.962487352	7.907768574	6.64E-07	1.85E-05	5.830059892	up
1-[2-Methyl-3-(methylthio) allyl]cyclohex-2-enol	-0.93968148	5.412713577	-7.800703654	7.91E-07	2.10E-05	5.813829915	down
N-[(3a,5b,7b)-7-hydroxy-24-oxo-3-(sulfooxy)cholan-24-yl]-Glycine	-0.974979209	8.006938303	-7.883087143	6.92E-07	1.91E-05	5.805663143	down
PI(18:0/20:3(8Z,11Z,14Z))	-1.34252086	6.413731942	-7.79187989	8.03E-07	2.10E-05	5.711583884	down
PC(18:3(9Z,12Z,15Z)/18:1(11Z))	-0.741821234	10.23317848	-7.836955854	7.46E-07	2.00E-05	5.700420151	down
PG(18:1(9Z)/22:5(7Z,10Z,13Z,16Z,19Z))	-3.437897633	5.01067453	-7.555560614	1.19E-06	2.72E-05	5.624172288	down
PI(18:1(9Z)/18:2(9Z,12Z))	-1.249752846	8.716835463	-7.773452268	8.28E-07	2.13E-05	5.619081041	down
PC(14:1(9Z)/20:1(11Z))	-0.743274465	10.26372905	-7.771696024	8.30E-07	2.13E-05	5.588552909	down
DG(16:1(9Z)/20:1(11Z)/0:0)	0.57441245	4.706465925	7.605258391	1.09E-06	2.62E-05	5.56479446	up
Palmitoylethanolamide	-1.052724264	6.596481191	-7.713949931	9.13E-07	2.27E-05	5.55731292	down
Porphobilinogen	0.551751069	6.826093442	7.721391189	9.02E-07	2.27E-05	5.546768865	up
PE(18:1(11Z)/P-18:0)	1.529742201	3.979974827	7.471941343	1.37E-06	3.03E-05	5.500061814	up
Fondaparinux sodium	-1.88555773	9.237270503	-7.708320764	9.21E-07	2.28E-05	5.495129223	down
DG(18:0/18:0/0:0)	-1.562511457	7.773668144	-7.696156565	9.40E-07	2.30E-05	5.490396887	down
Cer(d18:1/20:0)	-1.284946079	8.682113643	-7.684330932	9.59E-07	2.33E-05	5.467369083	down
4-hydroxyoct-4-enoylglycine	-4.40941757	1.862801629	-7.57285078	1.15E-06	2.70E-05	5.440131109	down
Ranitidine	-0.604334698	6.712104979	-7.643928253	1.03E-06	2.47E-05	5.423966449	down
PE(16:1(9Z)/22:0)	0.612264219	4.488862817	7.504353515	1.29E-06	2.95E-05	5.423193326	up
TG(20:1(11Z)/20:1(11Z)/20:1(11Z))	-1.557496675	6.255486421	-7.592881524	1.12E-06	2.65E-05	5.393684365	down
PE(20:2(11Z,14Z)/P-16:0)	-3.736949154	2.83513111	-7.325070127	1.75E-06	3.54E-05	5.337940488	down
PI(18:0/16:0)	0.512168729	6.177050482	7.564550795	1.17E-06	2.70E-05	5.314368272	up
myo-Inositol 6-phosphate	0.778501277	7.604034944	7.581143526	1.14E-06	2.69E-05	5.29639354	up
DG(14:1(9Z)/22:4(7Z,10Z,13Z,16Z)/0:0)	-0.890326726	7.862226444	-7.568321031	1.16E-06	2.70E-05	5.269142591	down
PC(18:2(9Z,12Z)/P-16:0)	-1.090218559	5.599205745	-7.490085467	1.33E-06	3.00E-05	5.266593483	down
Prostaglandin E3	-3.310004012	2.050424193	-7.335973028	1.72E-06	3.52E-05	5.260569288	down
DG(20:2(11Z,14Z)/20:2(11Z,14Z)/0:0)	-1.292306451	3.064617663	-7.223926805	2.08E-06	4.00E-05	5.198051334	down
4-hydroxyoct-2-enoylglycine	-0.963188764	6.024353535	-7.471021526	1.37E-06	3.03E-05	5.184412785	down
PI(22:3(10Z,13Z,16Z)/18:3(9Z,12Z,15Z))	-1.011260754	5.630028304	-7.434492115	1.46E-06	3.16E-05	5.164810162	down
PE(15:0/18:1(11Z))	0.580407848	4.867188469	7.370784291	1.62E-06	3.36E-05	5.139540823	up
PC(18:3(6Z,9Z,12Z)/18:0)	0.469506292	8.170017235	7.476653455	1.36E-06	3.03E-05	5.109355744	non
DG(22:4(7Z,10Z,13Z,16Z)/14:1(9Z)/0:0)	-1.231055524	5.458073104	-7.38096173	1.59E-06	3.32E-05	5.095654291	down
8-Isoprostane	0.829911083	8.474918418	7.45755352	1.40E-06	3.08E-05	5.072534675	up
Isoeugenol	-1.198118037	3.536163241	-7.173515503	2.27E-06	4.27E-05	5.06119314	down
PE(22:1(13Z)/16:1(9Z))	-1.339033708	4.950519284	-7.318261894	1.77E-06	3.56E-05	5.060216934	down
1-Methylethyl heptanoic acid	-0.912699026	6.072212965	-7.403003515	1.54E-06	3.24E-05	5.059330013	down
PI(18:1(11Z)/18:3(9Z,12Z,15Z))	-1.194002617	8.020697964	-7.438340643	1.45E-06	3.16E-05	5.042016037	down
PC(16:1(9Z)/20:4(5Z,8Z,11Z,14Z))	0.626669686	4.406499879	7.258023037	1.97E-06	3.85E-05	5.00958481	up
LysoPE(0:0/18:3(6Z,9Z,12Z))	0.905817255	6.410782932	7.393613483	1.56E-06	3.27E-05	5.003890231	up
DG(20:3(8Z,11Z,14Z)/18:3(6Z,9Z,12Z)/0:0)	-1.618558589	7.511943556	-7.402885117	1.54E-06	3.24E-05	4.990377831	down
8-Hydroxyguanosine	0.462789818	7.435579728	7.403558841	1.53E-06	3.24E-05	4.988454071	non
PE(22:5(7Z,10Z,13Z,16Z,19Z)/P-18:0)	0.836792228	10.21221528	7.414807607	1.51E-06	3.24E-05	4.974842036	up
Oleamide	-0.731533803	6.180191458	-7.33290722	1.73E-06	3.52E-05	4.920473353	down
PI(18:1(9Z)/20:4(5Z,8Z,11Z,14Z))	-0.884151827	9.60214393	-7.35982254	1.65E-06	3.40E-05	4.890395028	down
PC(20:5(5Z,8Z,11Z,14Z,17Z)/18:1(11Z))	-0.724077156	4.167352218	-7.13109694	2.45E-06	4.54E-05	4.850979755	down
PE(18:0/22:5(4Z,7Z,10Z,13Z,16Z))	0.985307873	3.361145861	7.042961261	2.85E-06	5.06E-05	4.842643597	up
Disulfiram	-1.628588686	8.222830532	-7.303332876	1.82E-06	3.63E-05	4.806128445	down
TG(18:2(9Z,12Z)/18:2(9Z,12Z)/18:2(9Z,12Z))	0.834360074	10.21140383	7.291818784	1.86E-06	3.68E-05	4.758548223	up
PC(22:0/20:1(11Z))	0.875994892	9.53826057	7.273939319	1.91E-06	3.77E-05	4.743634991	up
PC(18:2(9Z,12Z)/22:2(13Z,16Z))	-0.638407624	6.903117034	-7.241767704	2.02E-06	3.93E-05	4.716138148	down
3'-Sialyl-3-fucosyllactose	-2.191344878	4.826477304	-7.042777474	2.85E-06	5.06E-05	4.658122542	down
PI(18:2(9Z,12Z)/20:0)	0.625556257	4.869551672	7.094715251	2.60E-06	4.73E-05	4.653782243	up
alpha-Dimorphecolic acid	0.419454713	8.713830289	7.220831611	2.10E-06	4.00E-05	4.651912891	non
PI(20:3(5Z,8Z,11Z)/18:0)	-1.052266501	10.08526653	-7.225285679	2.08E-06	4.00E-05	4.641551782	down
Floxuridine	0.759328496	10.13000936	7.207064927	2.15E-06	4.08E-05	4.61129059	up
Cer(d18:1/12:0)	-4.871458983	3.268512631	-6.865454067	3.89E-06	6.41E-05	4.586803936	down
PE(18:2(9Z,12Z)/P-18:0)	-2.081785742	3.603200538	-6.871591376	3.85E-06	6.37E-05	4.56547561	down
PE(18:1(9Z)/22:4(7Z,10Z,13Z,16Z))	-2.466415733	2.847809794	-6.839292963	4.07E-06	6.64E-05	4.565228497	down
DG(15:0/20:1(11Z)/0:0)	1.186117933	5.713394601	7.095766263	2.60E-06	4.73E-05	4.553067094	up
PE(20:3(5Z,8Z,11Z)/18:0)	0.629288741	10.90256222	7.186757193	2.22E-06	4.20E-05	4.544392127	up
DG(14:1(9Z)/18:0/0:0)	1.137316852	5.614811607	7.082497168	2.66E-06	4.80E-05	4.539205029	up
Ibuprofen	-1.016790444	6.839291517	-7.134425229	2.43E-06	4.54E-05	4.534095479	down
PC(18:1(11Z)/20:4(8Z,11Z,14Z,17Z))	0.603175892	3.882634672	6.923178979	3.51E-06	5.91E-05	4.519960412	up
Argininic acid	-1.148000473	7.760916027	-7.123522057	2.48E-06	4.57E-05	4.487160112	down
Ticlopidine	0.480990073	6.075942381	7.078791321	2.68E-06	4.80E-05	4.467825414	non
DG(16:1(9Z)/14:1(9Z)/0:0)	0.65568791	4.81237398	6.985710154	3.15E-06	5.50E-05	4.467260097	up
Shikimic acid	-0.968495924	7.150558638	-7.09539469	2.60E-06	4.73E-05	4.452618484	down
Buspirone	-1.418140621	3.736623167	-6.822116061	4.20E-06	6.81E-05	4.42722399	down
TG(18:1(9Z)/18:1(9Z)/20:4(5Z,8Z,11Z,14Z))	0.65769826	3.518225943	6.813552356	4.27E-06	6.88E-05	4.404067963	up
PE(20:2(11Z,14Z)/20:3(8Z,11Z,14Z))	0.581870077	5.819836966	6.992444496	3.11E-06	5.46E-05	4.34090495	up
DG(18:2(9Z,12Z)/22:5(7Z,10Z,13Z,16Z,19Z)/0:0)	1.196197747	3.205340534	6.729195339	4.96E-06	7.65E-05	4.319123186	up
PE(16:0/20:2(11Z,14Z))	-1.132354308	3.742339854	-6.763410853	4.66E-06	7.33E-05	4.305176952	down
PC(14:0/18:1(11Z))	-1.03813014	5.013394564	-6.901514488	3.65E-06	6.07E-05	4.298690986	down
DG(22:2(13Z,16Z)/18:3(9Z,12Z,15Z)/0:0)	-0.85824258	8.050486893	-7.013156378	3.00E-06	5.30E-05	4.287572106	down
PC(20:2(11Z,14Z)/18:3(9Z,12Z,15Z))	-0.890893261	5.929477891	-6.93938756	3.42E-06	5.77E-05	4.250201802	down
PE(P-18:1(9Z)/20:0)	0.789275121	6.110419876	6.954569035	3.33E-06	5.72E-05	4.245359993	up
PI(20:4(5Z,8Z,11Z,14Z)/20:1(11Z))	-1.140619503	6.314173291	-6.952479742	3.34E-06	5.72E-05	4.241802476	down
Dydrogesterone	0.458069446	7.150493997	6.980042361	3.18E-06	5.52E-05	4.235829501	non
DG(20:2(11Z,14Z)/20:4(5Z,8Z,11Z,14Z)/0:0)	0.774140577	3.570859464	6.705276888	5.17E-06	7.95E-05	4.202027634	up
Epinephrine	0.630800658	7.632538767	6.947552045	3.37E-06	5.72E-05	4.175537857	up
PC(22:0/20:0)	0.901955708	4.623324791	6.777224076	4.55E-06	7.20E-05	4.123610425	up
PC(P-18:1(11Z)/18:2(9Z,12Z))	1.483448318	7.009367527	6.904537205	3.63E-06	6.07E-05	4.114914487	up
Ceruletide	0.708070069	12.12788201	6.947604531	3.37E-06	5.72E-05	4.062328253	up
TG(16:1(9Z)/18:0/20:4(5Z,8Z,11Z,14Z))	-1.032702508	6.637612077	-6.861575157	3.92E-06	6.42E-05	4.050540405	down
trans-Hexadec-2-enoyl carnitine	2.342830825	4.180011134	6.632506386	5.89E-06	8.88E-05	4.041539478	up
PI(16:0/16:1(9Z))	-4.098589908	3.665085853	-6.516053243	7.27E-06	0.000102442	4.00243533	down
Hexachlorophene	-1.347422903	3.810775093	-6.59251865	6.33E-06	9.28E-05	3.997640009	down
PI(18:0/22:5(4Z,7Z,10Z,13Z,16Z))	0.462526025	6.229051711	6.803742632	4.34E-06	6.93E-05	3.957383198	non
PC(20:1(11Z)/20:5(5Z,8Z,11Z,14Z,17Z))	-0.913215055	7.052391058	-6.804279371	4.34E-06	6.93E-05	3.927637142	down
PC(22:1(13Z)/20:3(5Z,8Z,11Z))	0.97391201	4.27533923	6.632857852	5.89E-06	8.88E-05	3.926457376	up
Docosatrienoic acid	-1.589930879	6.932956946	-6.782197032	4.51E-06	7.17E-05	3.904089832	down
Mono-(2-ethyl-5-hydroxyhexyl) phthalate	-0.638638581	6.383234003	-6.752686993	4.75E-06	7.41E-05	3.858156922	down
PC(20:3(5Z,8Z,11Z)/16:1(9Z))	0.981315153	3.261160636	6.475096931	7.83E-06	0.000109088	3.850550174	up
Bisnorbiotin	1.424156536	6.346992837	6.729778545	4.95E-06	7.65E-05	3.828720275	up
Indecainide	0.471476356	10.35792958	6.761189531	4.68E-06	7.33E-05	3.796531296	non
PC(18:2(9Z,12Z)/20:4(8Z,11Z,14Z,17Z))	0.626484438	4.87700099	6.601212672	6.23E-06	9.18E-05	3.758251155	up
PE(24:0/24:0)	-1.283550767	7.466215878	-6.690209473	5.31E-06	8.12E-05	3.70757224	down
4-Hydroxynonenal	1.702138865	6.758303082	6.655713527	5.65E-06	8.60E-05	3.673267262	up
Cyclic GMP	1.049768441	3.073581401	6.359042459	9.68E-06	0.000127947	3.67075747	up
Timolol	0.629340272	3.620955816	6.39281457	9.10E-06	0.000122796	3.61815125	up
21-Hydroxy-5b-pregnane-3,11,20-trione	-1.327755026	6.281537248	-6.589250509	6.37E-06	9.28E-05	3.586462937	down
PE(P-16:0/18:2(9Z,12Z))	0.770753709	6.703121684	6.613015817	6.10E-06	9.09E-05	3.578869395	up
PC(20:0/22:5(7Z,10Z,13Z,16Z,19Z))	-1.12674415	8.337137903	-6.611927327	6.11E-06	9.09E-05	3.553445818	down
PI(20:3(8Z,11Z,14Z)/18:0)	-0.783567403	9.978623708	-6.621312709	6.01E-06	9.02E-05	3.548872472	down
PI(20:0/18:2(9Z,12Z))	-0.900047979	5.33106097	-6.515483599	7.28E-06	0.000102442	3.541619823	down
TG(16:0/16:0/20:1(11Z))	1.280205101	3.301864965	6.303174306	1.07E-05	0.000135919	3.536914984	up
Lanthionine ketimine	0.342693249	8.380290625	6.602629456	6.22E-06	9.18E-05	3.531291382	non
PC(24:0/16:0)	0.534341012	4.095733437	6.401100093	8.96E-06	0.000121458	3.519228832	up
PC(14:1(9Z)/18:1(9Z))	-0.811083106	8.358854107	-6.587445654	6.39E-06	9.28E-05	3.506913208	down
Buclizine	1.143817719	6.68221445	6.563759615	6.67E-06	9.60E-05	3.493899594	up
PC(20:3(5Z,8Z,11Z)/22:2(13Z,16Z))	0.735454666	9.887696413	6.583517182	6.44E-06	9.31E-05	3.483789175	up
Triamterene	-0.62663086	5.961474227	-6.525998218	7.14E-06	0.000101913	3.479547696	down
DG(16:0/18:4(6Z,9Z,12Z,15Z)/0:0)	-0.705820124	5.859898061	-6.513426246	7.31E-06	0.000102442	3.470239714	down
Chlorotrianisene	0.553603241	3.809143261	6.334045032	1.01E-05	0.000130732	3.462308006	up
Indomethacin	0.506759095	7.538119723	6.554270462	6.78E-06	9.73E-05	3.452801881	up
DG(22:5(4Z,7Z,10Z,13Z,16Z)/16:1(9Z)/0:0)	0.690982314	4.065585859	6.345696367	9.92E-06	0.000129523	3.427843476	up
PC(18:4(6Z,9Z,12Z,15Z)/24:1(15Z))	0.437805977	4.479267318	6.38772538	9.19E-06	0.000123083	3.418728603	non
2-[4-hydroxy-3-(sulfooxy)phenyl]acetic acid	-1.433401972	5.15641333	-6.417720956	8.70E-06	0.000118826	3.399643154	down
DG(24:1(15Z)/24:1(15Z)/0:0)	-0.853659367	8.803844666	-6.520003681	7.22E-06	0.000102442	3.37783712	down
Melatonin	0.55716859	3.474063231	6.242911921	1.20E-05	0.000147218	3.373048182	up
Milrinone	-1.892575838	3.338310881	-6.190448514	1.32E-05	0.000157797	3.365014753	down
PC(18:1(11Z)/18:2(9Z,12Z))	-1.571103523	3.672422937	-6.217349143	1.26E-05	0.000153398	3.347674206	down
PE(18:0/22:5(7Z,10Z,13Z,16Z,19Z))	1.007677443	6.294688432	6.474037433	7.85E-06	0.000109088	3.347533662	up
Cer(d18:1/18:0)	0.991976	3.703812924	6.242080308	1.20E-05	0.000147218	3.331516697	up
O-Desmethylnaproxen	0.566533111	9.248681402	6.443656478	8.29E-06	0.000114305	3.232419881	up
Canrenone	0.918949101	5.283559352	6.348330466	9.88E-06	0.000129424	3.230110794	up
20-Carboxy-leukotriene B4	-1.651941544	7.384103392	-6.428240032	8.53E-06	0.000117063	3.22589426	down
Aspirin	0.352644707	10.00699481	6.446880659	8.25E-06	0.000114125	3.225413688	non
PC(20:1(11Z)/16:1(9Z))	-0.567786216	6.38774662	-6.40741411	8.86E-06	0.000120573	3.21438763	down
PE(15:0/20:1(11Z))	-0.890696933	4.921392878	-6.302107199	1.08E-05	0.000135919	3.203213846	down
PC(20:3(8Z,11Z,14Z)/P-18:1(9Z))	0.803398726	5.165232033	6.311528782	1.06E-05	0.00013464	3.176841692	up
Testosterone	0.510964514	6.470021285	6.386967361	9.20E-06	0.000123083	3.166587391	up
PE(20:1(11Z)/18:1(11Z))	1.32243291	3.049721531	6.07545755	1.64E-05	0.000184584	3.158578884	up
PC(18:0/P-18:1(11Z))	-0.80843565	4.966480753	-6.263497265	1.15E-05	0.00014314	3.120960124	down
(S)-Carvone	0.774366943	6.731848183	6.361418614	9.64E-06	0.000127947	3.106249269	up
PE(22:2(13Z,16Z)/18:3(6Z,9Z,12Z))	-1.159599845	6.471009302	-6.341868185	9.99E-06	0.000129909	3.099336122	down
PC(18:2(9Z,12Z)/20:3(8Z,11Z,14Z))	-0.616962132	7.649172844	-6.361112213	9.65E-06	0.000127947	3.088006369	down
Succimer	-1.427054645	8.863289089	-6.356809742	9.72E-06	0.000127947	3.07139646	down
DG(20:1(11Z)/18:3(6Z,9Z,12Z)/0:0)	-0.547217201	7.388146333	-6.334846048	1.01E-05	0.000130732	3.041144101	down
Aminosalicylic Acid	0.513755407	9.546129555	6.331661752	1.02E-05	0.000130781	3.018965016	up
DG(16:0/18:1(11Z)/0:0)	-0.675083696	3.713399052	-6.067845166	1.66E-05	0.000186582	3.005604853	down
PE(20:0/18:1(9Z))	-1.310130082	8.071293403	-6.316443903	1.05E-05	0.000133959	2.998098495	down
Brompheniramine	0.673622058	4.613620692	6.15270252	1.42E-05	0.000167411	2.956956968	up
PC(22:1(13Z)/P-18:1(9Z))	0.65741235	6.733154807	6.281976321	1.12E-05	0.000140507	2.954185599	up
4-Hydroxyketamine	0.576050629	5.21959929	6.193935495	1.31E-05	0.000157363	2.945298401	up
Aztreonam	-1.1466661	5.204643819	-6.179692943	1.35E-05	0.000160387	2.932514897	down
PI(20:3(8Z,11Z,14Z)/18:1(11Z))	-0.685009333	8.494001286	-6.272128109	1.14E-05	0.000142526	2.912082935	down
PA(18:1(11Z)/18:1(11Z))	-0.80645899	4.345455472	-6.090486291	1.59E-05	0.000180093	2.910862211	down
PI(20:4(5Z,8Z,11Z,14Z)/20:0)	-1.016561568	7.759998959	-6.26533315	1.15E-05	0.00014314	2.902718533	down
Sedoheptulose	0.466893518	5.966847834	6.215785167	1.26E-05	0.000153398	2.881761193	non
PC(14:0/22:4(7Z,10Z,13Z,16Z))	0.491759447	4.021671934	6.051408107	1.71E-05	0.000191754	2.87624612	non
PC(18:0/18:0)	0.520839583	4.799736895	6.116177101	1.52E-05	0.000174721	2.857060713	up
CDP	0.510914321	5.220800755	6.143169253	1.44E-05	0.000168554	2.848139483	up
Arachidic acid	1.24875369	4.241029054	6.041032121	1.75E-05	0.000194174	2.84321976	up
PC(20:3(8Z,11Z,14Z)/18:1(9Z))	0.460952618	6.510352176	6.201789188	1.29E-05	0.000156172	2.81213141	non
Dihydrotestosterone	-1.014036832	12.08777021	-6.267835709	1.15E-05	0.000143102	2.798567086	down
DG(16:1(9Z)/20:3(5Z,8Z,11Z)/0:0)	0.630906002	11.13552132	6.246248647	1.19E-05	0.000147211	2.7980155	up
PG(18:2(9Z,12Z)/18:1(11Z))	-2.200502151	2.334608883	-5.83156159	2.60E-05	0.000260686	2.795175598	down
N-Deisopropyl-fluvastatin	-1.382641213	3.758708423	-5.938159309	2.12E-05	0.00022559	2.793585918	down
Lorazepam	0.417329524	6.906236776	6.200038852	1.30E-05	0.000156172	2.789244954	non
15(S)-HPETE	-0.936254414	8.711487937	-6.202171607	1.29E-05	0.000156172	2.778273814	down
Pyrimidine, 2,4- bis[(trimethylsilyl)oxy]-	-1.312758145	6.837503738	-6.173101406	1.37E-05	0.000161767	2.760867841	down
TG(16:0/16:0/18:2(9Z,12Z))	-1.593951719	6.076446798	-6.133613833	1.47E-05	0.000170963	2.757774306	down
PC(24:0/18:4(6Z,9Z,12Z,15Z))	-0.545144797	5.368532863	-6.101870476	1.56E-05	0.000177548	2.749665123	down
PE(P-16:0/20:2(11Z,14Z))	0.825399616	5.577314277	6.1057595	1.55E-05	0.000176889	2.726559678	up
PE(18:1(9Z)/20:0)	-2.467170653	2.725846085	-5.797722906	2.77E-05	0.000272128	2.71818692	down
6-hydroxyoct-4-enoylglycine	-0.955383434	6.057368071	-6.121275948	1.50E-05	0.000173688	2.712173699	down
DG(14:0/18:3(9Z,12Z,15Z)/0:0)	-1.603808608	7.621175281	-6.148695825	1.43E-05	0.000167513	2.684609334	down
Ganglioside GM3 (d18:1/26:1(17Z)))	-1.651060346	4.980750563	-6.001284173	1.88E-05	0.000206393	2.652494556	down
Gluconolactone	1.119770338	7.445368117	6.122598219	1.50E-05	0.000173688	2.63561078	up
Calcitroic acid	-0.69411233	4.792788796	-5.993257689	1.91E-05	0.000208826	2.631494331	down
DG(18:2(9Z,12Z)/22:4(7Z,10Z,13Z,16Z)/0:0)	0.60700905	10.68229175	6.148445728	1.43E-05	0.000167513	2.6305292	up
PC(20:2(11Z,14Z)/18:2(9Z,12Z))	0.442460783	8.142681931	6.111651717	1.53E-05	0.000175576	2.607666378	non
LysoPA(0:0/16:0)	1.291621086	4.681675256	5.95433015	2.06E-05	0.00022099	2.584058475	up
7-Dehydrocholesterol	0.372750335	7.898363229	6.095885898	1.58E-05	0.000178912	2.581844031	non
PC(18:1(11Z)/22:0)	-1.173274848	5.809866062	-6.003479647	1.88E-05	0.000206245	2.521242225	down
DG(18:1(9Z)/20:5(5Z,8Z,11Z,14Z,17Z)/0:0)	-1.052175331	5.88550151	-6.003918686	1.87E-05	0.000206245	2.509552405	down
Taurocholic acid 3-sulfate	-1.372557836	3.368685435	-5.747407967	3.05E-05	0.000290553	2.503431829	down
DG(18:3(9Z,12Z,15Z)/18:1(9Z)/0:0)	-1.278157338	4.270485257	-5.850474862	2.51E-05	0.000253838	2.50158966	down
Ergothioneine	1.058226528	4.46331193	5.893579493	2.31E-05	0.000243065	2.500165259	up
Octadecanol	0.606881799	4.101769778	5.863570397	2.44E-05	0.000249431	2.499922989	up
Isocitric acid	0.437587941	7.012516141	6.043519612	1.74E-05	0.00019394	2.485636401	non
Sertraline	-1.692520549	3.911356684	-5.781660705	2.86E-05	0.000277226	2.48526198	down
PE(20:4(8Z,11Z,14Z,17Z)/18:0)	0.501695044	6.50061726	6.027527339	1.79E-05	0.000198478	2.477828383	up
Diphenhydramine	-0.515226612	5.294486055	-5.945185579	2.09E-05	0.00022335	2.457788506	down
PC(22:5(4Z,7Z,10Z,13Z,16Z)/14:1(9Z))	0.519358493	5.658386924	5.96887337	2.00E-05	0.000216448	2.446732052	up
PE(18:1(11Z)/20:1(11Z))	-1.667839792	2.029374677	-5.623007064	3.88E-05	0.000347809	2.41793056	down
Carisoprodol	0.596901843	6.572905387	5.987942861	1.93E-05	0.000210214	2.397344963	up
3-Methyluridine	-0.854006276	6.913081407	-5.983895415	1.95E-05	0.000211109	2.38415867	down
PE(18:3(9Z,12Z,15Z)/22:2(13Z,16Z))	0.326446868	5.855536138	5.947717221	2.08E-05	0.000223024	2.376829348	non
DG(22:5(7Z,10Z,13Z,16Z,19Z)/14:1(9Z)/0:0)	0.44198524	4.960101176	5.8751008	2.39E-05	0.000246892	2.368853586	non
PC(20:3(8Z,11Z,14Z)/22:1(13Z))	0.922410767	5.697549911	5.927492712	2.16E-05	0.000228677	2.368413045	up
PC(22:4(7Z,10Z,13Z,16Z)/16:0)	0.551256441	6.347109313	5.962661547	2.03E-05	0.000218268	2.362539141	up
Galactitol	1.393738282	5.322038083	5.886372763	2.34E-05	0.000245342	2.346922008	up
TG(16:0/16:0/20:4(5Z,8Z,11Z,14Z))	-1.59871569	2.815313547	-5.606297964	4.01E-05	0.000354292	2.327551885	down
Sulfanilamide	0.409869443	6.110251366	5.930119301	2.15E-05	0.000228293	2.317074347	non
DG(18:3(9Z,12Z,15Z)/18:2(9Z,12Z)/0:0)	1.252295384	3.456671215	5.666138635	3.57E-05	0.000326389	2.304039416	up
DG(22:4(7Z,10Z,13Z,16Z)/18:2(9Z,12Z)/0:0)	-1.335551487	4.519379048	-5.775529534	2.89E-05	0.000278813	2.299405366	down
PI(18:1(9Z)/18:1(11Z))	0.569506446	4.664547644	5.805886138	2.73E-05	0.000271114	2.278825055	up
PE(16:1(9Z)/20:1(11Z))	1.014571374	4.006495443	5.724034087	3.19E-05	0.000300531	2.272692653	up
TG(18:0/18:0/18:0)	1.67287401	4.999557098	5.814731358	2.68E-05	0.00026752	2.267062468	up
Epinastine	-1.278278759	5.762227831	-5.863001231	2.45E-05	0.000249431	2.257228665	down
PC(18:3(6Z,9Z,12Z)/18:1(9Z))	-0.583677644	4.741970814	-5.795885891	2.78E-05	0.000272253	2.254576054	down
PC(20:0/16:0)	-0.583725416	6.003503339	-5.88494407	2.35E-05	0.000245342	2.250090212	down
PC(P-18:0/22:5(7Z,10Z,13Z,16Z,19Z))	-0.742663589	4.750453686	-5.791381256	2.81E-05	0.000272944	2.249051436	down
TG(16:0/16:1(9Z)/18:2(9Z,12Z))	-1.680715656	6.505176986	-5.872429112	2.40E-05	0.000247354	2.215269192	down
N-Acetylproline	-1.242946228	3.759377849	-5.641082949	3.74E-05	0.00033966	2.211564968	down
Quinic acid	1.418742954	5.739061701	5.840940015	2.55E-05	0.00025687	2.208980996	up
Altretamine	-1.530281847	6.725903204	-5.879635641	2.37E-05	0.000245563	2.205796106	down
Phosphatidylserine	0.635740675	4.740508606	5.771662369	2.91E-05	0.000280044	2.201034809	up
PE(18:1(9Z)/18:0)	-1.291459324	5.343697346	-5.803006105	2.74E-05	0.000271114	2.190408075	down
DG(22:1(13Z)/18:3(9Z,12Z,15Z)/0:0)	-1.029665913	5.10696038	-5.779527108	2.87E-05	0.000277522	2.171095777	down
PC(20:0/14:1(9Z))	-0.476125733	6.412937675	-5.864257854	2.44E-05	0.000249431	2.168725455	non
PC(20:1(11Z)/20:3(8Z,11Z,14Z))	0.373118399	8.018077851	5.883516482	2.35E-05	0.000245342	2.167967374	non
DG(18:1(11Z)/22:4(7Z,10Z,13Z,16Z)/0:0)	-1.385195896	5.058792961	-5.746227852	3.06E-05	0.000290553	2.127136082	down
PC(20:3(5Z,8Z,11Z)/18:3(9Z,12Z,15Z))	0.604043521	7.846242737	5.857086527	2.47E-05	0.000251456	2.117948058	up
TG(20:1(11Z)/20:4(5Z,8Z,11Z,14Z)/20:4(5Z,8Z,11Z,14Z))	1.28888485	4.398197782	5.673635817	3.52E-05	0.000323548	2.098877079	up
PI(18:0/18:3(6Z,9Z,12Z))	0.948611406	6.070246404	5.800623657	2.76E-05	0.000271454	2.076777382	up
TG(18:0/20:1(11Z)/20:1(11Z))	-0.930702828	11.54973663	-5.8811767	2.36E-05	0.000245563	2.074828712	down
N2-Methylguanine	-1.070095852	7.548432613	-5.829127914	2.61E-05	0.000261082	2.064071826	down
Trihexosylceramide (d18:1/25:0)	0.343101216	10.01367633	5.842335692	2.55E-05	0.00025687	2.063951464	non
PE(20:2(11Z,14Z)/P-18:0)	-3.193450092	3.626911048	-5.482274725	5.10E-05	0.000426263	2.060949395	down
PI(22:6(4Z,7Z,10Z,13Z,16Z,19Z)/18:0)	0.405113439	6.470195383	5.802888754	2.74E-05	0.000271114	2.041707391	non
Lisinopril	0.929115232	4.887056068	5.68828577	3.42E-05	0.000316356	2.01867843	up
Carbenicillin	1.113325351	3.927527291	5.581003236	4.21E-05	0.000368039	2.018543025	up
PC(18:1(11Z)/20:2(11Z,14Z))	0.936773108	3.22801148	5.494513126	4.98E-05	0.00041838	2.011368486	up
11-trans-Leukotriene C4	0.741265185	5.26181914	5.712053601	3.27E-05	0.000305738	2.006359292	up
N-Acetylvanilalanine	1.094730888	4.026042803	5.578017862	4.23E-05	0.000369171	1.986953235	up
TG(16:0/18:2(9Z,12Z)/20:1(11Z))	0.563727916	5.750896326	5.73921562	3.10E-05	0.00029362	1.985756405	up
PC(14:1(9Z)/20:3(8Z,11Z,14Z))	-0.662450252	8.706521584	-5.79359857	2.79E-05	0.000272615	1.984083568	down
DG(20:2(11Z,14Z)/16:1(9Z)/0:0)	0.827357783	6.382306395	5.767441014	2.94E-05	0.000281474	1.980476992	up
PG(18:1(11Z)/18:1(11Z))	0.564421553	4.137395239	5.586200127	4.16E-05	0.000365344	1.94897812	up
PC(22:1(13Z)/P-18:0)	0.531276163	6.518592813	5.753328157	3.02E-05	0.00028833	1.941666538	up
PE(18:1(11Z)/P-18:1(9Z))	-0.993397881	6.132482982	-5.727245706	3.17E-05	0.000299561	1.938684652	down
DG(20:4(8Z,11Z,14Z,17Z)/18:1(9Z)/0:0)	0.632652533	3.761170988	5.495528021	4.97E-05	0.00041838	1.869559077	up
PI(18:3(9Z,12Z,15Z)/18:1(11Z))	-1.063736352	6.547960185	-5.700069708	3.34E-05	0.000311958	1.849397755	down
3-Methoxymorphinan	-1.285009587	2.897883775	-5.36586306	6.40E-05	0.000499117	1.844876656	down
5-Hydroxymethyl tolterodine	0.50861618	9.730165049	5.722239304	3.20E-05	0.000300688	1.83580249	up
PC(20:0/18:3(6Z,9Z,12Z))	0.644231914	4.944122857	5.600030727	4.05E-05	0.000356654	1.83249724	up
DG(20:3(8Z,11Z,14Z)/18:1(11Z)/0:0)	0.385321806	5.226162915	5.615377712	3.94E-05	0.000350274	1.820205169	non
Sulfadiazine	1.050559299	3.121450874	5.378528892	6.25E-05	0.000493282	1.810647238	up
PC(22:2(13Z,16Z)/20:2(11Z,14Z))	-0.571980583	5.618426647	-5.636882268	3.78E-05	0.000341464	1.809799023	down
2-Hydroxydecanoate	-3.531517318	1.92442947	-5.290255863	7.43E-05	0.000559018	1.803298309	down
Zileuton sulfoxide	0.450626436	7.06289818	5.68913736	3.41E-05	0.000316356	1.791780054	non
Nicotine-1'-N-oxide	-0.919203397	7.893779905	-5.688768465	3.42E-05	0.000316356	1.782080238	down
PC(22:5(7Z,10Z,13Z,16Z,19Z)/16:0)	-0.622255033	6.781828953	-5.675447513	3.50E-05	0.000323347	1.78027516	down
DG(18:0/20:3(5Z,8Z,11Z)/0:0)	-0.999120732	4.983913906	-5.569139264	4.30E-05	0.000373557	1.776748959	down
MG(18:2(9Z,12Z)/0:0/0:0)	-0.944177596	4.246429686	-5.475800899	5.16E-05	0.000430565	1.747991685	down
PE(18:4(6Z,9Z,12Z,15Z)/22:0)	1.526905162	3.471736738	5.375176779	6.29E-05	0.000493282	1.74708569	up
8-Dehydrocholesterol	-0.939085841	9.554769157	-5.669487367	3.54E-05	0.000325214	1.728019582	down
PI(20:3(8Z,11Z,14Z)/20:3(5Z,8Z,11Z))	-0.643272586	6.536843797	-5.641218058	3.74E-05	0.00033966	1.724139555	down
2,6-octadienoylglycine	1.798215361	3.792756966	5.386103167	6.15E-05	0.000493282	1.716549171	up
Capsaicin	0.551084302	6.241758193	5.626184763	3.85E-05	0.000346646	1.709845528	up
Taurohyocholate	0.527265495	7.321625264	5.647981404	3.70E-05	0.000337068	1.708369125	up
PI(18:3(9Z,12Z,15Z)/22:3(10Z,13Z,16Z))	-1.756508355	3.139750381	-5.30414402	7.23E-05	0.000546446	1.703871589	down
DG(22:5(4Z,7Z,10Z,13Z,16Z)/16:0/0:0)	-1.583322689	3.70112906	-5.357928858	6.50E-05	0.000504522	1.695044604	down
PI(18:1(9Z)/20:3(5Z,8Z,11Z))	1.09805629	5.586474419	5.572224485	4.28E-05	0.000372333	1.688744309	up
LysoPE(14:0/0:0)	0.873103337	6.306889613	5.611146681	3.97E-05	0.000351951	1.677887438	up
PI(16:0/18:1(11Z))	-3.834432652	2.096395025	-5.208291257	8.74E-05	0.000635297	1.654371642	down
PC(14:0/20:1(11Z))	-0.746133704	3.83573368	-5.382319282	6.20E-05	0.000493282	1.651979158	down
Methyclothiazide	0.3573049	7.415843305	5.617602714	3.92E-05	0.000350274	1.647846763	non
PC(18:4(6Z,9Z,12Z,15Z)/P-18:1(9Z))	-0.691540963	9.895359258	-5.627450795	3.84E-05	0.000346646	1.640386494	down
DG(16:0/18:3(6Z,9Z,12Z)/0:0)	0.323694192	8.166702042	5.615043133	3.94E-05	0.000350274	1.635766655	non
PI(18:3(6Z,9Z,12Z)/18:1(11Z))	1.690638042	5.758503018	5.546183066	4.50E-05	0.000388495	1.633785509	up
TG(18:1(9Z)/20:1(11Z)/20:1(11Z))	0.619922136	4.642995137	5.47298676	5.19E-05	0.000431765	1.62694297	up
Eugenol	0.611233432	4.394995168	5.445423154	5.48E-05	0.000448756	1.616622823	up
DG(16:1(9Z)/18:0/0:0)	-1.994315723	4.067842448	-5.340436241	6.73E-05	0.000518449	1.614373729	down
PC(20:2(11Z,14Z)/20:4(8Z,11Z,14Z,17Z))	0.366705066	7.469696726	5.600109092	4.05E-05	0.000356654	1.613079304	non
DG(20:4(8Z,11Z,14Z,17Z)/20:1(11Z)/0:0)	-1.20321178	4.192853455	-5.387124246	6.14E-05	0.000493282	1.60700361	down
PC(24:0/P-16:0)	0.69534724	4.01813843	5.393141823	6.07E-05	0.000490711	1.601281976	up
PC(16:0/24:1(15Z))	0.3468496	5.136510062	5.498025188	4.94E-05	0.000417765	1.600763196	non
DG(18:3(6Z,9Z,12Z)/20:0/0:0)	0.372641652	5.460207817	5.518208554	4.75E-05	0.000408039	1.590271203	non
Cer(d18:0/16:0)	0.74887519	6.104229827	5.547379894	4.49E-05	0.000388495	1.568016598	up
alpha-CEHC	-0.661771022	5.633386524	-5.5110407	4.82E-05	0.000412674	1.560009342	down
PE(P-18:1(9Z)/18:1(9Z))	0.710468953	3.804472188	5.343143518	6.70E-05	0.00051693	1.5591322	up
PI(20:3(5Z,8Z,11Z)/16:0)	-0.812614001	6.554190498	-5.528185863	4.66E-05	0.00040126	1.501298839	down
PC(22:2(13Z,16Z)/14:0)	0.603186541	4.376858483	5.377549938	6.26E-05	0.000493282	1.484592596	up
N-Acetylglutamine	0.380720256	5.291660666	5.445657718	5.48E-05	0.000448756	1.472333818	non
4,4-Dimethyl-5a-cholesta-8-en-3b-ol	-2.242039515	5.920658312	-5.449271552	5.44E-05	0.000447673	1.460781226	down
1-Phenyl-2-hexanone	-1.009385904	6.560027939	-5.50512522	4.88E-05	0.000415716	1.459836214	down
DG(20:3(8Z,11Z,14Z)/18:2(9Z,12Z)/0:0)	-1.462676551	6.971575226	-5.504543605	4.88E-05	0.000415716	1.449042548	down
Guanosine 2',3'-cyclic phosphate	0.563317724	6.387728563	5.497958649	4.94E-05	0.000417765	1.443710151	up
DG(14:0/16:1(9Z)/0:0)	-0.898260657	6.325418469	-5.483191655	5.09E-05	0.000426263	1.430804251	down
PC(18:1(11Z)/20:0)	-0.689645698	4.790442792	-5.374762887	6.29E-05	0.000493282	1.415993768	down
Selenocystathionine	0.299540835	9.026177576	5.498045521	4.94E-05	0.000417765	1.395457888	non
Enprofylline	-0.85314877	4.565845774	-5.332230583	6.84E-05	0.000524852	1.381616304	down
DG(20:3(8Z,11Z,14Z)/20:3(8Z,11Z,14Z)/0:0)	0.933518645	5.460596347	5.411251532	5.86E-05	0.000477396	1.381265788	up
PG(18:1(11Z)/18:1(9Z))	-0.809820779	4.590897053	-5.330571672	6.87E-05	0.000524852	1.370956484	down
15-Keto-prostaglandin F2a	-2.024428645	2.792835505	-5.090498923	0.000110601	0.000768698	1.351068601	down
Prostaglandin D1	0.575822896	4.913046275	5.350986097	6.59E-05	0.000510233	1.340390033	up
PC(14:1(9Z)/P-18:1(11Z))	-0.648937272	9.573698706	-5.471723926	5.20E-05	0.000431765	1.336690246	down
PC(18:0/18:1(11Z))	-0.878100782	6.405335008	-5.428909962	5.66E-05	0.000462325	1.314491374	down
PG(18:3(9Z,12Z,15Z)/20:3(8Z,11Z,14Z))	0.531787702	4.02769962	5.252066629	8.02E-05	0.000597311	1.310709947	up
Clemastine	-1.168244357	9.722235144	-5.449985461	5.43E-05	0.000447673	1.284732449	down
PC(22:2(13Z,16Z)/18:1(11Z))	1.064739324	5.05701523	5.330963353	6.86E-05	0.000524852	1.282132043	up
Syringic acid	-1.198126798	6.221965948	-5.392090903	6.08E-05	0.000490711	1.26965908	down
DG(16:0/20:3(8Z,11Z,14Z)/0:0)	-0.982957927	5.763928886	-5.367702185	6.38E-05	0.000498524	1.266368163	down
PC(20:3(8Z,11Z,14Z)/16:0)	-0.407210101	10.75535786	-5.454123729	5.39E-05	0.000445729	1.262648692	non
PC(20:0/20:4(8Z,11Z,14Z,17Z))	0.647423102	5.151445893	5.321708469	6.99E-05	0.000531577	1.245719883	up
TG(20:0/20:0/20:4(5Z,8Z,11Z,14Z))	1.400432715	4.022662905	5.184508968	9.17E-05	0.000664554	1.228995907	up
PC(20:0/18:0)	0.373199283	7.45003436	5.406326709	5.91E-05	0.000480811	1.225494009	non
LysoPE(18:1(11Z)/0:0)	1.146349372	4.186563724	5.213170123	8.66E-05	0.000632029	1.224100955	up
PE(P-18:1(9Z)/22:4(7Z,10Z,13Z,16Z))	0.796133204	6.229294061	5.377554236	6.26E-05	0.000493282	1.216356678	up
Oxytocin	0.386285156	6.268739521	5.379609095	6.23E-05	0.000493282	1.214344448	non
PC(20:4(5Z,8Z,11Z,14Z)/P-18:1(11Z))	0.46322557	7.476637417	5.39792818	6.01E-05	0.000487568	1.208566014	non
PE(20:0/16:1(9Z))	-1.118433174	7.030993123	-5.374315756	6.30E-05	0.000493282	1.178664831	down
PC(14:1(9Z)/22:2(13Z,16Z))	0.872876788	4.294139345	5.209376247	8.73E-05	0.000635297	1.174508373	up
Isoflurane	0.32923802	8.631411227	5.383884856	6.18E-05	0.000493282	1.164725582	non
L-Iditol	0.863663717	5.822590171	5.327430246	6.91E-05	0.000526859	1.162503858	up
PI(16:0/22:5(7Z,10Z,13Z,16Z,19Z))	-2.576574354	1.922841033	-4.940156676	0.000149611	0.000958887	1.15062047	down
Tetraethylene glycol	-0.962734548	4.934719043	-5.247549807	8.09E-05	0.000598516	1.141087992	down
Prostaglandin B2	1.143881486	7.615594196	5.363578386	6.43E-05	0.000500151	1.137124593	up
DG(15:0/15:0/0:0)	1.221224969	2.569638094	4.980014987	0.000138061	0.000912167	1.132982714	up
TG(18:0/18:1(9Z)/20:1(11Z))	2.467050252	3.219411479	5.008325633	0.000130417	0.000874345	1.126456233	up
Hetacillin	0.310193476	10.38031802	5.376980562	6.27E-05	0.000493282	1.123919507	non
6-nonenoylglycine	-0.950294853	3.598440787	-5.07862579	0.00011326	0.000782106	1.117703203	down
TG(22:6(4Z,7Z,10Z,13Z,16Z,19Z)/18:0/22:6(4Z,7Z,10Z,13Z,16Z,19Z))	-0.622240609	4.041817848	-5.145014955	9.92E-05	0.000710925	1.11540964	down
PE(15:0/18:1(9Z))	0.765518413	4.081381707	5.156243512	9.70E-05	0.000698037	1.113499287	up
Pramipexole	-0.708164852	3.739736861	-5.100509756	0.000108408	0.000758383	1.110519061	down
6-hydroxyoct-5-enoylglycine	-3.353097086	3.84820932	-5.002863847	0.000131857	0.000879701	1.097373967	down
PC(18:2(9Z,12Z)/20:1(11Z))	-1.624298046	3.945295249	-5.083516496	0.000112157	0.000776155	1.09587063	down
PC(18:3(9Z,12Z,15Z)/14:1(9Z))	1.190166228	4.424300755	5.165919505	9.51E-05	0.000688056	1.074801112	up
DG(22:4(7Z,10Z,13Z,16Z)/18:1(11Z)/0:0)	-2.215374087	6.508307317	-5.285563206	7.50E-05	0.00056291	1.074311009	down
Warfarin	0.529247736	5.579673315	5.267190995	7.78E-05	0.000582387	1.068329625	up
14,15-Epoxy-5,8,11-eicosatrienoic acid	-1.260966735	3.138288129	-4.986435715	0.000136288	0.000902309	1.053985734	down
DG(18:2(9Z,12Z)/20:3(8Z,11Z,14Z)/0:0)	-1.344930425	2.639835348	-4.935981504	0.000150878	0.000963157	1.046923733	down
DG(20:4(5Z,8Z,11Z,14Z)/18:2(9Z,12Z)/0:0)	0.482561763	7.56918656	5.307302109	7.19E-05	0.000544329	1.025630992	non
Dicloxacillin	0.27920212	9.237763549	5.308723999	7.17E-05	0.000544086	1.01540557	non
Pyroglutamylvaline	-0.965359717	5.3840154	-5.216649003	8.60E-05	0.000629107	1.007164172	down
Hydroxycelecoxib	0.576703173	9.826675493	5.300632276	7.28E-05	0.000548958	0.989997013	up
DG(20:3(8Z,11Z,14Z)/14:1(9Z)/0:0)	-0.857403882	6.146214865	-5.243959411	8.15E-05	0.000600562	0.966382195	down
Donepezil metabolite M4	0.270690163	6.182226185	5.247807475	8.09E-05	0.000598516	0.954536989	non
DG(20:3(5Z,8Z,11Z)/18:1(11Z)/0:0)	1.472486672	4.679347621	5.126131055	0.000102998	0.00073015	0.953054812	up
PC(20:1(11Z)/16:0)	0.815344159	4.349164765	5.100689308	0.000108369	0.000758383	0.9401101	up
PI(20:2(11Z,14Z)/18:0)	-0.973323809	7.035759622	-5.256092581	7.95E-05	0.000593944	0.937056908	down
Glimepiride	-1.211976865	4.567334141	-5.090671634	0.000110562	0.000768698	0.916564265	down
DG(16:0/20:4(5Z,8Z,11Z,14Z)/0:0)	0.363807846	7.885390596	5.250496156	8.04E-05	0.000597786	0.908906203	non
Promazine	0.455968671	6.801646334	5.243508856	8.15E-05	0.000600562	0.906452051	non
DG(20:5(5Z,8Z,11Z,14Z,17Z)/20:2(11Z,14Z)/0:0)	-1.078807213	4.09056362	-5.007236299	0.000130702	0.000874345	0.859599699	down
PG(16:0/22:5(4Z,7Z,10Z,13Z,16Z))	-1.948837181	4.415925729	-5.009820737	0.000130025	0.000874345	0.85555112	down
Thiabendazole	-1.621398152	4.769468564	-5.067086779	0.000115908	0.000793565	0.850268296	down
PE(14:0/24:1(15Z))	1.046863054	3.443328098	4.933780989	0.000151549	0.000965525	0.849842265	up
D-Xylose	0.830523621	8.364174292	5.225324434	8.45E-05	0.000621195	0.849564961	up
DG(14:0/18:1(9Z)/0:0)	-1.336497836	4.250942005	-5.002131181	0.000132051	0.000879701	0.828696657	down
3-hydroxyphenylpropionylglycine	-2.998729253	1.341682676	-4.764573355	0.000213591	0.001272432	0.823454414	down
Nicotine glucuronide	0.663776751	4.933263669	5.084881737	0.000111851	0.000775708	0.799741588	up
PC(18:1(11Z)/22:5(7Z,10Z,13Z,16Z,19Z))	-0.506423069	5.7019398	-5.12794072	0.000102626	0.00073015	0.774734925	down
PC(18:4(6Z,9Z,12Z,15Z)/P-16:0)	0.696838308	3.323976998	4.869905177	0.000172447	0.001085737	0.741824529	up
N1-Methyl-2-pyridone-5-carboxamide	-0.873119599	12.36130984	-5.222454658	8.50E-05	0.000623317	0.7229516	down
Azithromycin	0.547098492	7.919947094	5.156129005	9.70E-05	0.000698037	0.715969387	up
Sulpiride	0.339744396	9.131829572	5.15531193	9.72E-05	0.000698037	0.703511484	non
PC(P-18:0/20:5(5Z,8Z,11Z,14Z,17Z))	-1.661939171	5.142314836	-5.031384475	0.000124513	0.000845265	0.696461607	down
PC(18:1(9Z)/P-16:0)	0.606637505	5.476524326	5.07535126	0.000114005	0.000784954	0.695499194	up
N1-Acetylspermidine	0.345338281	4.706134085	5.016725888	0.000128233	0.000865035	0.693751368	non
PE(20:3(8Z,11Z,14Z)/20:1(11Z))	0.77436904	7.293989728	5.135623051	0.000101064	0.000721151	0.678140238	up
Quinine	0.817309581	9.382986518	5.142545598	9.97E-05	0.000712844	0.675116902	up
DG(14:0/24:0/0:0)	2.325934341	2.069930341	4.700168477	0.000243586	0.00141183	0.668802148	up
PI(18:1(11Z)/20:4(8Z,11Z,14Z,17Z))	0.384661909	6.570345924	5.120330699	0.000104198	0.000735337	0.667732108	non
DG(22:6(4Z,7Z,10Z,13Z,16Z,19Z)/18:1(11Z)/0:0)	-0.897732301	7.631872572	-5.125263205	0.000103176	0.00073015	0.652757692	down
3-hydroxyoct-3-enoylglycine	-0.965419923	4.839110107	-4.997322846	0.000133334	0.000886411	0.651634688	down
DG(18:0/18:1(11Z)/0:0)	-1.270260671	7.673284425	-5.124977175	0.000103235	0.00073015	0.650815757	down
DG(16:1(9Z)/22:0/0:0)	0.286850968	8.848735204	5.116579079	0.000104981	0.000739244	0.622784927	non
PC(18:3(6Z,9Z,12Z)/22:1(13Z))	0.475199642	5.871557362	5.065206146	0.000116346	0.000794867	0.615411203	non
S-(2-carboxypropyl)-Cysteamine	0.91568417	3.18439413	4.781719011	0.000206263	0.001233354	0.604746301	up
DG(22:5(4Z,7Z,10Z,13Z,16Z)/18:0/0:0)	-1.150964745	4.064193904	-4.870082511	0.000172385	0.001085737	0.592002139	down
gamma-Linolenic acid	-0.64872448	9.687281806	-5.101479624	0.000108198	0.000758383	0.584952578	down
PI(16:2(9Z,12Z)/16:0)	0.896060221	7.936423993	5.091018609	0.000110486	0.000768698	0.580841408	up
6-hydroxyoct-3-enoylglycine	-1.219727014	5.02898573	-4.961475929	0.000143315	0.000935333	0.550789513	down
DG(20:2(11Z,14Z)/16:0/0:0)	0.861728022	5.874445085	5.028109797	0.000125334	0.000849046	0.547548724	up
Diethyl phthalic acid	-0.796356029	8.597637046	-5.07466688	0.000114162	0.000784954	0.542849657	down
PC(14:0/P-18:1(9Z))	0.805678855	9.330478826	5.068930552	0.000115481	0.000792329	0.52511209	up
beta-1,4-Mannosyl-N-acetylglucosamine	-0.620768115	5.086938987	-4.953994434	0.000145493	0.000943793	0.510963196	down
Rutin	0.675362044	4.354143444	4.882728807	0.000168026	0.001062069	0.489455136	up
DG(18:3(6Z,9Z,12Z)/18:2(9Z,12Z)/0:0)	-1.617546234	3.745521541	-4.756889237	0.000216961	0.001286326	0.480972096	down
DG(18:1(11Z)/18:4(6Z,9Z,12Z,15Z)/0:0)	0.553196046	7.26996636	5.037824274	0.000122913	0.000837951	0.477509389	up
PC(18:0/22:5(4Z,7Z,10Z,13Z,16Z))	0.552482522	8.888276018	5.035092919	0.000123589	0.000840773	0.456368946	up
DG(14:1(9Z)/22:2(13Z,16Z)/0:0)	0.372682064	7.89812771	5.017722674	0.000127977	0.000865035	0.433741524	non
Ubiquinone-1	-1.778760963	6.507961203	-4.97810169	0.000138594	0.000913808	0.427067379	down
CL(i-14:0/i-17:0/a-17:0/a-15:0)[rac]	-0.595957069	5.763808708	-4.957661888	0.000144421	0.00094064	0.420757811	down
PC(14:1(9Z)/20:0)	-1.07267381	5.461093868	-4.928189997	0.00015327	0.000972627	0.411748645	down
3-Hepteneoylglycine	-0.581437717	4.124714465	-4.809205834	0.000195049	0.001181703	0.407951289	down
Tadalafil	-1.851592524	7.054115573	-4.989284067	0.000135509	0.000899004	0.407885527	down
Epigallocatechin gallate	0.833901637	3.932847494	4.786195497	0.000204393	0.001226739	0.404057775	up
PC(18:1(11Z)/22:2(13Z,16Z))	-0.654207916	8.647255832	-5.007513134	0.00013063	0.000874345	0.403564726	down
PC(P-16:0/20:1(11Z))	0.817096652	4.275681988	4.822312068	0.000189924	0.001159923	0.388647868	up
PC(22:4(7Z,10Z,13Z,16Z)/P-18:0)	0.605436032	4.64756106	4.854367933	0.000177963	0.001109591	0.373547397	up
Mazindol	0.853137416	4.14251694	4.79754137	0.00019973	0.001203249	0.372308771	up
PC(P-16:0/18:4(6Z,9Z,12Z,15Z))	0.568654557	5.199916623	4.893882366	0.000164276	0.001040412	0.36730455	up
Genistein	0.483805464	6.073419679	4.948376612	0.000147151	0.000947931	0.353558783	non
N-Octyl phenyl ketone	-0.627909942	6.823892554	-4.963115858	0.000142842	0.000934145	0.340199405	down
PC(22:2(13Z,16Z)/18:3(6Z,9Z,12Z))	-0.647880105	6.529457314	-4.95485527	0.000145241	0.000943793	0.337176656	down
TG(18:2(9Z,12Z)/20:4(5Z,8Z,11Z,14Z)/20:4(5Z,8Z,11Z,14Z))	-0.714019988	7.735485003	-4.970586908	0.000140708	0.000924606	0.33506629	down
Atracurium	-1.116364561	4.329167466	-4.775456269	0.00020891	0.001246856	0.326737355	down
PC(20:2(11Z,14Z)/20:2(11Z,14Z))	0.367245009	7.830239036	4.95129518	0.000146287	0.000947031	0.29798443	non
PC(P-18:1(9Z)/P-18:0)	0.421805565	7.798278624	4.94990226	0.000146699	0.000947785	0.295273494	non
DG(18:1(11Z)/18:3(9Z,12Z,15Z)/0:0)	0.481234809	5.067618445	4.847536932	0.000180445	0.00111425	0.292319796	non
PC(22:2(13Z,16Z)/18:2(9Z,12Z))	-0.850842516	3.78534292	-4.696810138	0.000245263	0.001418992	0.288208678	down
Acarbose	-1.087296341	7.981088553	-4.947834776	0.000147312	0.000947931	0.284230363	down
PC(18:0/18:3(9Z,12Z,15Z))	0.309562424	7.379626305	4.937673033	0.000150363	0.000961786	0.271187017	non
LysoPC(O-18:0/0:0)	0.819927214	5.257765531	4.849696054	0.000179657	0.001113016	0.268161248	up
LacCer(d18:1/16:0)	-0.541802618	7.153215281	-4.93208828	0.000152068	0.000966912	0.264753799	down
DG(18:0/18:3(9Z,12Z,15Z)/0:0)	0.48405406	3.910242947	4.719250504	0.000234274	0.001370226	0.258618719	non
20alpha-Dihydroprogesterone	-0.695886298	12.11167757	-4.970235147	0.000140807	0.000924606	0.217639244	down
PE(18:1(9Z)/18:1(9Z))	-1.021771229	5.794267297	-4.851004452	0.000179181	0.001113016	0.210723116	down
PC(24:1(15Z)/16:1(9Z))	0.439717461	5.357412854	4.821156296	0.00019037	0.001159923	0.191962189	non
16(R)-HETE	0.26119429	12.64423844	4.967929537	0.000141463	0.000927015	0.18862229	non
Palmitoleic acid	-0.895095132	11.70524346	-4.943324152	0.000148658	0.000954683	0.180729773	down
7-nonenoylglycine	0.57273626	5.849004992	4.849032774	0.000179899	0.001113016	0.175739269	up
DG(18:2(9Z,12Z)/18:3(9Z,12Z,15Z)/0:0)	0.832654963	6.036145478	4.856925733	0.000177043	0.001106	0.175319632	up
Remoxipride	0.292606888	6.256733354	4.861203534	0.000175514	0.001098588	0.157585344	non
PC(22:5(4Z,7Z,10Z,13Z,16Z)/P-18:0)	0.46550055	5.325331233	4.799745953	0.000198836	0.001200119	0.153067708	non
PC(18:0/18:3(6Z,9Z,12Z))	-0.610790379	5.970185836	-4.83445592	0.000185299	0.001139835	0.14150436	down
PE(22:0/14:1(9Z))	2.003234321	3.46680739	4.556936314	0.000326744	0.001789715	0.135714686	up
Tungsten	0.305340178	6.725041138	4.861721336	0.00017533	0.001098588	0.127498193	non
PE(18:1(9Z)/P-18:1(9Z))	0.611116561	5.759965103	4.812553222	0.000193727	0.001175911	0.112999996	up
PC(16:0/20:4(5Z,8Z,11Z,14Z))	-1.426801018	4.585474195	-4.688823689	0.000249301	0.001439411	0.10617561	down
PC(P-18:1(9Z)/18:3(9Z,12Z,15Z))	0.563935363	9.077584408	4.864172607	0.000174461	0.001096272	0.105266357	up
2,6-Di-tert-butyl-4-hydroxy-4-methyl-2,5-cyclohexadienone	-0.348744403	6.453852763	-4.84000663	0.000183223	0.001129231	0.101388132	non
7a-Hydroxy-cholestene-3-one	0.836376203	4.104295786	4.651300848	0.000269199	0.001520112	0.080136169	up
PE(18:3(9Z,12Z,15Z)/22:1(13Z))	0.996315991	6.572987755	4.830680325	0.000186724	0.001146408	0.077829832	up
DG(16:0/20:5(5Z,8Z,11Z,14Z,17Z)/0:0)	-0.464211355	6.01741784	-4.807533551	0.000195713	0.001183493	0.076130494	non
PI(16:0/18:0)	0.703600535	9.44626119	4.850190431	0.000179477	0.001113016	0.074711406	up
PE(P-16:0/22:1(13Z))	0.545549592	6.882349854	4.822083458	0.000190012	0.001159923	0.040166531	up
DG(20:3(5Z,8Z,11Z)/20:3(8Z,11Z,14Z)/0:0)	0.781667677	4.52153028	4.674292347	0.000256822	0.001467357	0.029291725	up
PC(22:2(13Z,16Z)/P-18:1(11Z))	0.777126211	7.54445528	4.820136335	0.000190765	0.001160127	0.027953609	up
PC(22:2(13Z,16Z)/P-18:0)	1.039587128	5.220671443	4.727638566	0.000230297	0.00135189	0.023588312	up
PC(22:2(13Z,16Z)/20:4(8Z,11Z,14Z,17Z))	0.557297086	5.412401024	4.742676447	0.000223339	0.001318277	0.021207219	up
TG(22:6(4Z,7Z,10Z,13Z,16Z,19Z)/22:6(4Z,7Z,10Z,13Z,16Z,19Z)/22:6(4Z,7Z,10Z,13Z,16Z,19Z))	-0.63404059	4.70157702	-4.679050021	0.000254334	0.001458333	0.012768357	down
TG(16:0/18:0/18:2(9Z,12Z))	0.871008629	3.360248627	4.504865523	0.000363737	0.001940134	-0.007380867	up
Cholic acid glucuronide	0.266106591	6.958773978	4.793614644	0.000201331	0.001210625	-0.022890706	non
2-octenoylglycine	0.652373611	4.575927462	4.650993723	0.000269369	0.001520112	-0.032735393	up
PC(24:1(15Z)/P-16:0)	0.800103599	5.264670632	4.703638259	0.000241865	0.00140439	-0.034867502	up
PC(18:2(9Z,12Z)/22:4(7Z,10Z,13Z,16Z))	0.644645695	11.08408805	4.824584019	0.00018905	0.001158471	-0.03727351	up
DG(20:3(5Z,8Z,11Z)/18:1(9Z)/0:0)	-0.943655111	8.10094862	-4.783319567	0.000205592	0.001231637	-0.055702094	down
LysoPA(18:0/0:0)	-1.797491495	3.966956372	-4.508209004	0.000361238	0.00193001	-0.065230582	down
PC(16:1(9Z)/16:0)	0.464183362	4.541637677	4.632137034	0.000279982	0.001568975	-0.06900031	non
DG(20:2(11Z,14Z)/18:3(9Z,12Z,15Z)/0:0)	-1.762875428	3.631730655	-4.466810779	0.000393456	0.002045488	-0.071567232	down
PC(22:1(13Z)/16:0)	0.708442922	5.828705731	4.725057562	0.000231513	0.00135655	-0.075359009	up
DG(14:1(9Z)/22:5(4Z,7Z,10Z,13Z,16Z)/0:0)	0.447379951	5.883517421	4.729892538	0.00022924	0.001348151	-0.077306132	non
p-Octopamine	0.375466884	5.139974364	4.671107436	0.000258501	0.001474328	-0.083657182	non
TG(16:1(9Z)/18:2(9Z,12Z)/20:1(11Z))	-0.682524682	3.951767884	-4.543007645	0.000336246	0.001829978	-0.085974677	down
p-Cresol glucuronide	0.552333616	6.978454135	4.756519109	0.000217125	0.001286326	-0.098485201	up
TG(16:0/16:1(9Z)/20:1(11Z))	-2.737740977	1.994367141	-4.294448038	0.000562395	0.002727872	-0.099576229	down
PC(14:1(9Z)/24:0)	-0.909180654	8.027295142	-4.759541215	0.000215792	0.001283164	-0.104842122	down
Trimethylsilyl nonanoic acid	-0.782303713	5.192545522	-4.653193041	0.000268158	0.001520112	-0.124538745	down
Lacto-N-difucohexaose	-0.725246272	3.998438391	-4.528851659	0.000346193	0.001871422	-0.125086318	down
DG(20:3(5Z,8Z,11Z)/14:0/0:0)	-2.148878098	1.816295867	-4.280074692	0.000579462	0.002789583	-0.125608089	down
4-Ethylbenzoic acid	-1.197952085	5.607989673	-4.669421037	0.000259395	0.001476802	-0.136980943	down
Ursodeoxycholic acid 3-sulfate	-0.930933592	7.406762848	-4.737953428	0.000225501	0.001328594	-0.139572664	down
Estradiol	0.578250502	9.079611536	4.742899471	0.000223238	0.001318277	-0.145966243	up
6,15-Diketo,13,14-dihydro-PGF1a	0.462332313	4.859250701	4.600991474	0.000298458	0.001658044	-0.185921517	non
PI(20:4(8Z,11Z,14Z,17Z)/18:0)	-0.585065082	3.257842816	-4.402341219	0.000449576	0.002269794	-0.186233937	down
PC(14:0/20:3(5Z,8Z,11Z))	-1.288230765	4.658899263	-4.555388629	0.000327786	0.001790004	-0.199821099	down
Gadodiamide	-1.519993419	6.316100536	-4.664485206	0.000262029	0.001489158	-0.215656117	down
19-Noretiocholanolone	-0.938805705	9.114386403	-4.709887907	0.000238796	0.001391607	-0.216981732	down
3,4,5-Trimethoxycinnamic acid	-0.787882529	9.151895495	-4.706992933	0.000240213	0.001397325	-0.222925405	down
N(6)-Methyllysine	-1.108857575	7.085453807	-4.681965747	0.000252822	0.001454857	-0.242440889	down
PC(16:0/22:6(4Z,7Z,10Z,13Z,16Z,19Z))	0.640333119	5.704391906	4.63420834	0.000278796	0.001565058	-0.248500083	up
DG(20:4(5Z,8Z,11Z,14Z)/20:2(11Z,14Z)/0:0)	-0.544245854	6.896754533	-4.680094432	0.000253791	0.001457824	-0.249536083	down
2-Methoxyestrone	0.415300071	9.032495153	4.688061947	0.000249689	0.001439411	-0.259949889	non
PI(18:2(9Z,12Z)/18:1(11Z))	0.532806807	5.883245034	4.639423649	0.000275831	0.001553849	-0.263912856	up
Oxaliplatin	0.376254883	7.168294323	4.67452183	0.000256701	0.001467357	-0.273140032	non
5-nonenoylglycine	-0.615137427	4.924188509	-4.556294498	0.000327176	0.001789715	-0.283368194	down
PG(18:1(9Z)/22:6(4Z,7Z,10Z,13Z,16Z,19Z))	-3.385188626	0.775509557	-4.172358047	0.000725313	0.003312916	-0.287679203	down
4-oxo-Retinoic acid	-1.742493679	3.290461706	-4.322100757	0.000530985	0.002603043	-0.294538673	down
PC(22:2(13Z,16Z)/16:1(9Z))	-0.528560569	4.158794554	-4.4739935	0.000387663	0.002033962	-0.295703654	down
N-Acetylvaline	1.125273263	4.833344135	4.539478642	0.000338698	0.001840203	-0.299519637	up
Metolazone	0.304764236	11.77365948	4.711163154	0.000238175	0.00139051	-0.304178791	non
LacCer(d18:1/12:0)	-1.140901909	6.510854598	-4.636604044	0.00027743	0.001560118	-0.307476047	down
Enterolactone	-1.020773005	3.537373097	-4.367944312	0.000482792	0.002412142	-0.310941147	down
5,6-DHET	0.600668273	5.483325631	4.587390696	0.000306913	0.001702069	-0.312438488	up
Biotin sulfone	0.92161642	7.810878841	4.652708869	0.000268424	0.001520112	-0.322772471	up
PE(20:4(8Z,11Z,14Z,17Z)/20:0)	3.112034513	2.225822427	4.18857086	0.000701178	0.00323489	-0.334352485	up
1-Methylhistidine	1.058715077	2.219825052	4.216894374	0.000660954	0.003093086	-0.33530343	up
PC(18:2(9Z,12Z)/18:1(11Z))	0.905105798	4.088867635	4.420130451	0.000433321	0.002201572	-0.39039448	up
DG(18:3(6Z,9Z,12Z)/20:1(11Z)/0:0)	-0.794746001	6.738479743	-4.607224954	0.000294663	0.001642645	-0.390507597	down
Hydrocortamate	0.363360954	4.068757399	4.426022874	0.00042807	0.002178339	-0.394415976	non
PC(20:0/20:4(5Z,8Z,11Z,14Z))	0.363348149	8.251939666	4.620104622	0.000286977	0.001605373	-0.396493957	non
LysoPE(22:6(4Z,7Z,10Z,13Z,16Z,19Z)/0:0)	-3.426405853	1.526452692	-4.113698427	0.0008199	0.003616345	-0.406696639	down
PC(18:3(6Z,9Z,12Z)/18:3(9Z,12Z,15Z))	0.251074276	6.81281484	4.603659707	0.000296828	0.001651843	-0.412642195	non
3,4-Dihydroxymandelic acid	0.404321492	5.866408581	4.566914367	0.000320107	0.001766086	-0.414735087	non
DG(14:1(9Z)/20:3(5Z,8Z,11Z)/0:0)	-1.312102547	4.937868073	-4.48260638	0.000380831	0.002004667	-0.416791216	down
Canthaxanthin	-0.896484472	8.853359968	-4.608622487	0.000293819	0.001640788	-0.423447284	down
PC(22:0/P-18:1(9Z))	0.504856954	4.699793958	4.467353136	0.000393015	0.002045488	-0.438177893	up
Alfuzosin	-2.134954644	2.448377669	-4.160950135	0.000742799	0.003345199	-0.443179389	down
PE(20:4(5Z,8Z,11Z,14Z)/P-18:0)	1.898109592	4.173577956	4.365100048	0.000485648	0.002420834	-0.44423088	up
DG(16:0/20:2(11Z,14Z)/0:0)	-0.531477648	4.007538209	-4.374192814	0.000476577	0.002391078	-0.461409813	down
Eicosapentaenoic acid	0.472479467	4.421319412	4.430978192	0.000423704	0.002159545	-0.463933788	non
N-Acetylgalactosamine	0.41364789	4.882744064	4.466533171	0.000393682	0.002045488	-0.469657142	non
Thiamine	0.48683133	3.269876154	4.267741322	0.000594526	0.002838533	-0.478062927	non
1,5-Anhydrosorbitol	0.86797176	8.980136605	4.580821308	0.000311084	0.001722227	-0.483891948	up
PC(16:1(9Z)/P-16:0)	0.316606508	8.199541268	4.569971317	0.000318101	0.00175804	-0.499755934	non
2-Methoxyestrone 3-glucuronide	0.99687887	7.370646443	4.561929863	0.000323405	0.001781224	-0.507209773	up
PC(22:0/18:0)	0.888206098	3.903342905	4.337264992	0.000514524	0.002545666	-0.511623654	up
DG(20:5(5Z,8Z,11Z,14Z,17Z)/16:0/0:0)	-2.14575996	2.086166091	-4.097035369	0.000848984	0.003719084	-0.51817387	down
PC(P-18:1(9Z)/18:4(6Z,9Z,12Z,15Z))	0.342609365	7.925377865	4.556316472	0.000327161	0.001789715	-0.522599047	non
PC(20:0/22:1(13Z))	0.801240016	4.09727326	4.35997185	0.000490841	0.00243977	-0.523594276	up
PC(P-18:1(9Z)/14:1(9Z))	0.521362798	8.905989975	4.560988379	0.000324032	0.001781621	-0.525642466	up
Guanadrel	-1.464649511	5.791374156	-4.488316007	0.000376369	0.001987701	-0.527453232	down
Methionine sulfoxide	-0.8342316	7.037251291	-4.545387927	0.000334603	0.001824124	-0.530247007	down
PC(20:1(11Z)/14:0)	-1.507967969	0.915216569	-4.040317607	0.000956049	0.004115111	-0.542211137	down
DG(14:0/22:6(4Z,7Z,10Z,13Z,16Z,19Z)/0:0)	0.57013799	3.952994677	4.334496474	0.00051749	0.002556402	-0.54706168	up
Dopamine	1.447146551	2.726616713	4.152180943	0.00075653	0.003392763	-0.554603864	up
DG(18:1(11Z)/14:1(9Z)/0:0)	0.448557692	6.148405772	4.509925305	0.000359962	0.001926398	-0.563217874	non
PC(18:3(9Z,12Z,15Z)/20:0)	-0.661644514	7.604062796	-4.535500829	0.000341484	0.001852204	-0.565592836	down
PC(22:4(7Z,10Z,13Z,16Z)/P-18:1(11Z))	0.524788773	6.987391577	4.529830577	0.000345495	0.001870802	-0.57121127	up
PC(16:1(9Z)/20:2(11Z,14Z))	-0.580582261	7.06378813	-4.526285253	0.000348028	0.001875029	-0.575063363	down
PE(P-18:1(9Z)/20:1(11Z))	0.775612014	6.416273513	4.513167474	0.000357564	0.00191676	-0.57552695	up
Palmitoylcarnitine	0.359290304	5.405493047	4.453121131	0.000404743	0.00208682	-0.58099223	non
PC(22:1(13Z)/18:1(9Z))	0.26355855	5.738556916	4.475411407	0.000386529	0.002031336	-0.588973084	non
Vitamin K1 2,3-epoxide	-0.783105079	5.560614	-4.451033777	0.000406493	0.002091745	-0.598297087	down
PG(18:0/22:6(4Z,7Z,10Z,13Z,16Z,19Z))	-0.513118987	7.861835109	-4.519145894	0.000353185	0.001896452	-0.602159186	down
PI(20:1(11Z)/20:4(5Z,8Z,11Z,14Z))	-1.067026296	8.785665115	-4.519692182	0.000352788	0.001896452	-0.607272018	down
5,7-octadienoylglycine	-1.115176707	5.886278468	-4.458547438	0.00040023	0.002072804	-0.613353414	down
Ranolazine	0.552792774	6.67813641	4.500221779	0.000367237	0.001952537	-0.620616122	up
PI(18:2(9Z,12Z)/18:0)	0.873899225	5.673944896	4.445462346	0.000411201	0.002105849	-0.632988012	up
PE(16:0/P-18:1(11Z))	0.869975382	4.255007274	4.322855122	0.000530154	0.002602941	-0.638181801	up
DG(18:1(9Z)/14:0/0:0)	0.363713591	7.894420828	4.500167328	0.000367279	0.001952537	-0.639609382	non
PC(20:4(5Z,8Z,11Z,14Z)/22:0)	-0.57532455	5.945452645	-4.452950262	0.000404886	0.00208682	-0.65010526	down
Testosterone sulfate	-1.106430092	8.830228573	-4.499210757	0.000368004	0.001953159	-0.650777668	down
DG(22:5(7Z,10Z,13Z,16Z,19Z)/18:0/0:0)	-1.01949357	4.960995064	-4.378531879	0.00047231	0.002373375	-0.650903229	down
Glycitein	0.360945987	6.209439662	4.467022093	0.000393284	0.002045488	-0.65855768	non
PI(18:2(9Z,12Z)/20:3(8Z,11Z,14Z))	-0.811519898	3.369757654	-4.183563804	0.000708543	0.003259503	-0.658986942	down
2-Indolecarboxylic acid	0.429712803	6.751064451	4.483816142	0.000379881	0.002002952	-0.65954123	non
PC(22:0/16:1(9Z))	0.433197952	6.290055082	4.469171939	0.000391542	0.002045488	-0.660160004	non
Phenylacetylglutamine	0.883780438	7.915924431	4.490207526	0.000374903	0.001983877	-0.663281297	up
PC(22:4(7Z,10Z,13Z,16Z)/P-18:1(9Z))	0.821614068	5.348894083	4.406314601	0.000445892	0.00225474	-0.667254002	up
PC(18:3(6Z,9Z,12Z)/22:0)	1.062781282	3.251658665	4.16540919	0.000735914	0.003333396	-0.670013378	up
PC(18:1(9Z)/22:5(4Z,7Z,10Z,13Z,16Z))	-0.338635638	9.226767551	-4.490046846	0.000375028	0.001983877	-0.673758793	non
DG(16:0/20:3(5Z,8Z,11Z)/0:0)	-0.452397156	3.849933075	-4.250233337	0.000616596	0.002920193	-0.679043907	non
DG(18:4(6Z,9Z,12Z,15Z)/22:1(13Z)/0:0)	2.417803233	2.485286655	4.033808069	0.000969181	0.004149387	-0.710962939	up
Dehydroxyzyleuton	0.541981639	7.351219965	4.464340824	0.000395468	0.002051452	-0.712484544	up
Oleoylethanolamide	-0.767832939	12.32404539	-4.527089609	0.000347452	0.001875029	-0.712872518	down
DG(14:0/22:5(4Z,7Z,10Z,13Z,16Z)/0:0)	0.870852813	3.687509114	4.206362662	0.00067563	0.003139575	-0.720239802	up
DG(20:3(8Z,11Z,14Z)/18:3(9Z,12Z,15Z)/0:0)	-1.289116738	4.898610508	-4.332922085	0.000519185	0.002560832	-0.721239011	down
Fenoldopam	1.075587996	2.697554821	4.071823429	0.000894991	0.003894058	-0.72213198	up
PC(20:4(5Z,8Z,11Z,14Z)/14:0)	0.343449198	6.623808664	4.448635799	0.000408513	0.002095422	-0.726667001	non
Flavin mononucleotide	0.416763118	6.99027136	4.449413968	0.000407856	0.002095402	-0.740482129	non
6-Hydroxydopamine	0.480158712	4.526970045	4.298737435	0.000557402	0.002711845	-0.760553827	non
PC(22:1(13Z)/18:2(9Z,12Z))	0.393966592	7.198174321	4.438315362	0.000417323	0.002133795	-0.766725909	non
PI(20:0/16:0)	-0.732672113	3.934472794	-4.209838716	0.00067075	0.003125946	-0.769795893	down
PE(18:1(9Z)/P-18:0)	-1.303029472	2.348125849	-4.00364701	0.001032449	0.004373608	-0.773156341	down
Celecoxib	-0.925590108	5.646417597	-4.367707297	0.000483029	0.002412142	-0.779834677	down
PA(18:0/18:2(9Z,12Z))	-0.71966212	8.247085487	-4.435281554	0.000419949	0.002143811	-0.782005392	down
PE(22:1(13Z)/18:4(6Z,9Z,12Z,15Z))	0.606688944	3.633322662	4.16466914	0.000737052	0.003333396	-0.801526353	up
2-Methoxy-estradiol-17b 3-glucuronide	-1.381380698	3.914821055	-4.163987554	0.000738102	0.003333396	-0.801947528	down
PC(20:4(5Z,8Z,11Z,14Z)/18:1(11Z))	0.251501406	11.16191462	4.45772699	0.000400909	0.002072978	-0.805949635	non
Calcitriol	0.270470072	11.8320533	4.46659016	0.000393635	0.002045488	-0.817867771	non
6-hydroxyoct-2-enoylglycine	1.40163765	3.887206832	4.168029146	0.000731898	0.00332879	-0.821075232	up
PC(24:1(15Z)/18:3(9Z,12Z,15Z))	0.852249902	4.021122781	4.201242743	0.000682883	0.003164124	-0.830394879	up
Darifenacin	0.294945907	6.659387482	4.399527993	0.000452203	0.002279473	-0.831794426	non
PC(22:5(7Z,10Z,13Z,16Z,19Z)/20:1(11Z))	0.611234172	6.896424183	4.396005643	0.000455514	0.002292565	-0.847964387	up
PC(22:2(13Z,16Z)/20:3(8Z,11Z,14Z))	0.540129115	4.313734728	4.232488985	0.000639815	0.003016808	-0.853952841	up
DG(14:1(9Z)/16:1(9Z)/0:0)	-0.469213771	6.142222292	-4.364475334	0.000486278	0.002420834	-0.861513561	non
PC(20:5(5Z,8Z,11Z,14Z,17Z)/18:0)	-1.838342893	3.818928633	-4.101036384	0.000841907	0.003698171	-0.86778947	down
Stanozolol	-0.68555739	10.60768986	-4.413870398	0.000438972	0.002226758	-0.872371195	down
PC(22:0/14:1(9Z))	0.317725993	5.671313467	4.320858028	0.000532358	0.002605793	-0.902229403	non
(S)-Lipoic acid	1.331712553	3.09535933	4.024029059	0.000989253	0.004218446	-0.909618366	up
PE(18:0/P-18:1(9Z))	0.384149093	5.01076395	4.258910945	0.000605555	0.002884716	-0.923744952	non
PI(18:1(9Z)/18:1(9Z))	-1.162815505	5.639078321	-4.292800062	0.000564326	0.002729997	-0.928709172	down
D-Glucuronic acid	0.452090456	6.098573416	4.325779792	0.000526943	0.002591139	-0.944628028	non
Minaprine	-0.39313355	12.62342338	-4.408606284	0.000443782	0.002247607	-0.975320733	non
3-Sulfodeoxycholic acid	0.541624619	4.320756739	4.174814552	0.000721603	0.003310094	-0.976252232	up
PC(18:3(9Z,12Z,15Z)/24:1(15Z))	-0.564530277	5.870295624	-4.292622911	0.000564534	0.002729997	-0.977096793	down
DG(20:3(8Z,11Z,14Z)/16:0/0:0)	1.119327803	2.993340583	3.981960979	0.001080507	0.004523477	-0.977181281	up
PC(16:0/18:1(9Z))	0.313133981	5.517907435	4.268897384	0.000593097	0.002838533	-0.986101552	non
DG(20:3(5Z,8Z,11Z)/18:2(9Z,12Z)/0:0)	0.312763548	8.641019426	4.341055968	0.000510491	0.002529608	-0.987435515	non
Thymol	0.339719103	5.407234264	4.257942408	0.000606777	0.002884716	-0.990274451	non
PC(P-18:1(11Z)/18:3(6Z,9Z,12Z))	0.298454199	7.617857573	4.325818508	0.0005269	0.002591139	-1.003374968	non
PC(14:1(9Z)/20:3(5Z,8Z,11Z))	-1.108427017	3.735456324	-4.05402135	0.000928989	0.004023948	-1.007015404	down
PE(P-18:0/22:4(7Z,10Z,13Z,16Z))	0.592283662	6.682864015	4.315276253	0.000538567	0.002632175	-1.00836006	up
Trihexosylceramide (d18:1/24:0)	0.482277831	12.05109965	4.368200762	0.000482535	0.002412142	-1.034268603	non
DG(16:0/20:4(8Z,11Z,14Z,17Z)/0:0)	0.846185193	5.746259313	4.256699815	0.000608349	0.002885391	-1.039440721	up
Methylhydroxygliclazide	0.517511202	4.640268161	4.173402923	0.000723732	0.003312916	-1.042673912	up
PC(14:0/24:0)	0.38969308	5.219461908	4.217861817	0.000659622	0.003092038	-1.043007677	non
DG(14:0/22:4(7Z,10Z,13Z,16Z)/0:0)	0.200559063	7.305916443	4.306133235	0.000548898	0.002678588	-1.04471276	non
Deoxyguanosine	0.433766901	5.356921189	4.226705426	0.000647574	0.003048913	-1.047164421	non
PI(16:0/22:4(7Z,10Z,13Z,16Z))	0.72564142	5.969911894	4.267411631	0.000594934	0.002838533	-1.048728079	up
Anidulafungin	0.430890244	6.104360443	4.27209056	0.000589169	0.002827834	-1.058095199	non
DG(16:1(9Z)/18:1(9Z)/0:0)	0.322553481	5.062268656	4.194848442	0.000692054	0.003201994	-1.066174132	non
5,6-octadienoylglycine	-0.705445033	7.823488218	-4.296754939	0.000559704	0.002718926	-1.069472329	down
DG(18:3(6Z,9Z,12Z)/20:2(11Z,14Z)/0:0)	1.976519456	3.66299761	3.995858597	0.001049455	0.004433947	-1.069748102	up
Estriol	0.563457219	12.1747156	4.353062213	0.000497928	0.00247117	-1.071644158	up
(R)-2-Hydroxycaprylic acid	0.315072079	9.787231971	4.301838586	0.00055382	0.002698506	-1.074771996	non
Argatroban	0.532798264	4.847780018	4.169186912	0.000730131	0.003325463	-1.085852158	up
PC(22:6(4Z,7Z,10Z,13Z,16Z,19Z)/P-18:0)	0.56863205	4.562586452	4.143578556	0.000770251	0.003443836	-1.090534	up
DG(18:3(6Z,9Z,12Z)/18:0/0:0)	-0.864210759	9.056192068	-4.289617473	0.000568073	0.002742982	-1.09533955	down
1,11-Undecanedicarboxylic acid	0.212022203	8.371253998	4.285060029	0.000573484	0.002764949	-1.101632969	non
PC(20:2(11Z,14Z)/16:0)	-1.4485433	6.666038683	-4.257522077	0.000607309	0.002884716	-1.101951131	down
(3R,6'R)-3-Hydroxy-3',4'-didehydro-beta,gamma-carotene	0.578556182	5.627836648	4.219703583	0.000657094	0.003084692	-1.105306326	up
Heptadecanoyl carnitine	-0.761613033	4.908750015	-4.159510927	0.000745035	0.00335057	-1.107121218	down
(3a,5b,7a)-23-Carboxy-7-hydroxy-24-norcholan-3-yl-b-D-Glucopyranosiduronic acid	0.354336814	4.909001403	4.16103071	0.000742674	0.003345199	-1.113497842	non
Omeprazole sulfone	0.295779017	6.081527017	4.241733938	0.000627609	0.002963607	-1.120553378	non
D-Maltose	0.752179302	7.751508033	4.267448282	0.000594888	0.002838533	-1.128017143	up
MG(0:0/18:1(9Z)/0:0)	-2.342520391	5.63023748	-4.166036106	0.000734951	0.003333396	-1.139723511	down
SM(d17:1/24:0)	-1.080840677	5.294245233	-4.164208509	0.000737761	0.003333396	-1.155948312	down
DG(18:2(9Z,12Z)/20:3(5Z,8Z,11Z)/0:0)	0.819600348	3.453829667	3.961215922	0.001128594	0.004657989	-1.160550946	up
Prostaglandin J2	-1.285113316	2.803091506	-3.859240976	0.001398324	0.005477739	-1.161811572	down
PE(18:1(9Z)/P-18:1(11Z))	1.535605611	3.404088564	3.931247801	0.001201905	0.00489184	-1.170568801	up
4-octenoylglycine	-0.755743072	5.018760071	-4.138329233	0.000778747	0.003472996	-1.171786222	down
Sialyllacto-N-tetraose b	-0.45673146	5.71581698	-4.185238594	0.000706071	0.00325279	-1.185434175	non
Petroselinic acid	-1.087316909	9.020330268	-4.245177092	0.000623124	0.002946761	-1.188288671	down
PC(P-16:0/20:2(11Z,14Z))	0.717552284	3.945743427	4.02184092	0.000993801	0.004226616	-1.190830516	up
PC(22:4(7Z,10Z,13Z,16Z)/18:1(11Z))	0.604165621	3.702023534	3.985500727	0.001072511	0.004507633	-1.196801474	up
PC(20:0/P-16:0)	-0.638892286	7.257176832	-4.225539818	0.000649149	0.003051854	-1.210488438	down
L-Tyrosine	0.525844745	12.06727247	4.279315987	0.000580377	0.002789808	-1.222027995	up
Methocarbamol	0.425214017	7.958732049	4.216300941	0.000661772	0.003093086	-1.236757574	non
DG(16:0/18:1(9Z)/0:0)	-0.879569422	4.502955882	-4.05357584	0.000929857	0.004023948	-1.237886872	down
11-Hydroxyandrosterone	1.493497992	2.94805338	3.837739989	0.001463027	0.005673649	-1.249761433	up
PC(18:1(9Z)/18:3(6Z,9Z,12Z))	-0.477546293	8.143560737	-4.210435198	0.000669916	0.003125946	-1.2538475	non
PC(22:1(13Z)/P-16:0)	0.315731964	5.628426847	4.144810844	0.00076827	0.003440606	-1.265216913	non
PC(18:3(6Z,9Z,12Z)/14:0)	0.339812477	8.493737372	4.203948783	0.00067904	0.003150862	-1.274513942	non
Cyclic AMP	1.07987163	6.037986762	4.158527777	0.000746566	0.003352762	-1.276628874	up
Methoxsalen	0.284526903	6.709954104	4.181097953	0.0007122	0.003271635	-1.29382475	non
Epi-coprostanol	0.263566195	9.072931625	4.191499009	0.000696907	0.00321981	-1.30018598	non
7C-aglycone	-1.028242851	5.822991225	-4.126137757	0.000798848	0.00353807	-1.30600647	down
PC(P-16:0/22:4(7Z,10Z,13Z,16Z))	0.630834706	3.847954519	3.951377717	0.001152149	0.004724843	-1.312763297	up
Adenosine monophosphate	0.232104521	6.959000724	4.172763558	0.000724699	0.003312916	-1.321854462	non
Octaethylene glycol	0.371395828	4.112412825	3.986486223	0.001070295	0.004504217	-1.323956849	non
PC(P-18:1(9Z)/18:1(9Z))	0.52001333	5.321010603	4.090483031	0.000860705	0.003765293	-1.327231738	up
TG(16:1(9Z)/20:4(5Z,8Z,11Z,14Z)/20:4(5Z,8Z,11Z,14Z))	0.277662166	5.02909476	4.063619356	0.000910499	0.003950829	-1.336714568	non
PC(P-18:1(9Z)/18:1(11Z))	0.701176742	5.615869301	4.105096231	0.000834786	0.003671916	-1.342761651	up
Oxoadipic acid	0.269475009	9.002904039	4.171084926	0.000727243	0.003317015	-1.343641566	non
Nervonyl carnitine	-0.506218166	6.903157388	-4.143028847	0.000771136	0.003443836	-1.376152771	down
3-(3-Hydroxyphenyl)-3-hydroxypropanoic acid	0.446758924	12.1976963	4.208880675	0.000672091	0.003127658	-1.376368122	non
DG(20:3(5Z,8Z,11Z)/20:4(5Z,8Z,11Z,14Z)/0:0)	-0.837863993	4.867659378	-4.021129286	0.000995285	0.004227328	-1.387971011	down
2,6 Dimethylheptanoyl carnitine	-1.215173502	3.930209446	-3.881175724	0.001335285	0.005306434	-1.412206397	down
Mesobilirubinogen	-0.83264252	8.193902205	-4.134747116	0.000784599	0.003494155	-1.413757993	down
DG(16:1(9Z)/16:1(9Z)/0:0)	-1.884643942	4.844070033	-3.972849696	0.001101366	0.004598814	-1.415785038	down
PC(14:0/22:0)	0.296723596	9.238343327	4.134095952	0.000785668	0.003494155	-1.420571414	non
PE(20:2(11Z,14Z)/20:2(11Z,14Z))	0.392617307	6.553842555	4.115285603	0.000817183	0.003609318	-1.422837063	non
3-Dehydrosphinganine	-1.913029453	2.35194594	-3.669668236	0.002084458	0.007588655	-1.426756223	down
TG(16:1(9Z)/18:0/20:0)	0.210173496	9.440331016	4.129608431	0.000793073	0.003517343	-1.430827756	non
Atropine	0.286625428	9.878226148	4.133180622	0.000787173	0.003496005	-1.432671292	non
3-Indolebutyric acid	0.568606915	4.82413836	4.001252083	0.001037649	0.004389842	-1.434354655	up
PE(16:0/18:1(11Z))	0.72898082	3.703144721	3.865565273	0.001379847	0.005436426	-1.441999859	up
DG(16:0/14:1(9Z)/0:0)	-0.613124001	7.003607156	-4.112404285	0.000822122	0.003621172	-1.442179368	down
DG(20:3(5Z,8Z,11Z)/18:3(6Z,9Z,12Z)/0:0)	0.985544202	5.337358372	4.034839603	0.000967088	0.004145954	-1.443957624	up
PC(18:0/P-18:0)	-0.564270509	10.00165214	-4.123105679	0.000803928	0.003555667	-1.460480971	down
Hydroxyzine	0.335160435	6.65323693	4.097450555	0.000848247	0.003719084	-1.466803179	non
gamma-Glutamylglycine	0.550330326	5.331945979	4.022966333	0.000991459	0.004222248	-1.470970663	up
DG(18:0/20:5(5Z,8Z,11Z,14Z,17Z)/0:0)	-0.735445344	2.967213707	-3.732632302	0.00182544	0.006810543	-1.483227812	down
PC(20:3(8Z,11Z,14Z)/P-18:1(11Z))	0.471785013	4.040340827	3.889681734	0.001311617	0.005225312	-1.504932313	non
DG(18:1(9Z)/22:6(4Z,7Z,10Z,13Z,16Z,19Z)/0:0)	0.526239829	4.914880102	3.971065495	0.001105499	0.004605988	-1.512821283	up
Pyridoxal 5'-phosphate	0.252388908	8.21399188	4.086876903	0.000867226	0.003788657	-1.514975789	non
DG(20:4(5Z,8Z,11Z,14Z)/16:1(9Z)/0:0)	0.283539478	7.922415697	4.082743965	0.000874761	0.003811203	-1.517402648	non
p-Synephrine	-0.919973568	5.607122085	-4.007142522	0.001024908	0.004347396	-1.532556275	down
Trimethoprim	1.151666238	3.82782016	3.82801911	0.001493263	0.00576306	-1.533613173	up
Turanose	0.636519429	5.086398864	3.970869532	0.001105954	0.004605988	-1.540382816	up
DG(16:0/18:0/0:0)	-0.609670376	4.136987187	-3.870858009	0.001364572	0.005402764	-1.544507895	down
PC(22:1(13Z)/20:4(5Z,8Z,11Z,14Z))	0.399266408	7.211412924	4.065178616	0.000907531	0.003943278	-1.551761146	non
Olopatadine	0.303197469	5.062183053	3.963696828	0.001122731	0.004657989	-1.551968579	non
2',3'-Anhydrolutein	-0.772140301	3.268819072	-3.737761938	0.001805819	0.006758141	-1.555526817	down
LysoPE(20:0/0:0)	0.642039869	3.832584098	3.829535662	0.001488504	0.00575161	-1.562052471	up
2-Fucosyllactose	0.647575045	5.049293577	3.955094029	0.001143194	0.004697129	-1.567526685	up
Biotin	0.261486069	7.141095747	4.050957173	0.000934972	0.004040638	-1.581548096	non
TG(20:1(11Z)/20:1(11Z)/20:4(5Z,8Z,11Z,14Z))	0.28174719	9.302033931	4.046844473	0.000943063	0.004070127	-1.604616911	non
Desogestrel	0.347733148	4.5802645	3.898202549	0.001288332	0.005173383	-1.611510998	non
Hydroflumethiazide	0.244513563	9.452861002	4.043098937	0.000950493	0.004096689	-1.61341709	non
beta-Glycerophosphoric acid	-1.65575758	8.312407979	-4.039132094	0.000958427	0.004119825	-1.613903055	down
Campesterol	-0.806946859	7.127119024	-4.029758289	0.000977443	0.004179186	-1.617326605	down
PC(20:0/20:5(5Z,8Z,11Z,14Z,17Z))	-0.684898325	8.221429414	-4.036787918	0.000963147	0.004134579	-1.620513007	down
DG(20:3(8Z,11Z,14Z)/14:0/0:0)	-0.64498357	6.004563884	-3.992406958	0.001057082	0.004460302	-1.623528615	down
DG(20:2(11Z,14Z)/20:5(5Z,8Z,11Z,14Z,17Z)/0:0)	0.902557124	5.189825196	3.93678987	0.001187994	0.004847076	-1.627579446	up
PC(18:3(6Z,9Z,12Z)/20:3(5Z,8Z,11Z))	-1.719260868	6.189633277	-3.967493642	0.001113818	0.004632734	-1.654510327	down
DG(18:1(11Z)/20:0/0:0)	-0.433415483	9.533258516	-4.024039165	0.000989232	0.004218446	-1.65726174	non
PC(18:2(9Z,12Z)/P-18:1(9Z))	0.634633403	6.076694263	3.984247738	0.001075334	0.0045077	-1.658884523	up
DG(14:1(9Z)/18:2(9Z,12Z)/0:0)	-0.956583144	5.708806148	-3.949187086	0.001157462	0.004734534	-1.666345809	down
Nervonic acid	0.289762774	12.86162516	4.084614958	0.000871342	0.003801464	-1.669275643	non
PI(18:2(9Z,12Z)/18:1(9Z))	0.302340576	4.359857785	3.843480863	0.001445462	0.00563274	-1.68353414	non
PI(18:2(9Z,12Z)/20:3(5Z,8Z,11Z))	0.944656378	3.260031854	3.675569787	0.00205869	0.007511878	-1.689716442	up
MG(22:6(4Z,7Z,10Z,13Z,16Z,19Z)/0:0/0:0)	-0.776303289	3.593283507	-3.718585172	0.001880275	0.006963739	-1.690758645	down
Metoprolol	-0.365636983	4.875268865	-3.877880991	0.001344567	0.00533672	-1.699856608	non
hydroxybutyrylglycine	-0.66123525	7.274829447	-3.991291754	0.001059558	0.004464883	-1.704411275	down
Tenoxicam	1.195169739	4.078242338	3.777112851	0.001662179	0.006293935	-1.708940579	up
7alpha-Hydroxycholesterol	0.580051609	3.371308101	3.687011326	0.002009638	0.007374799	-1.710930916	up
Orotic acid	0.612925529	4.435520758	3.834731619	0.001472318	0.005697685	-1.712381335	up
5alpha-Cholest-8-en-3beta-ol	0.211297952	6.072056473	3.956271607	0.001140371	0.004694526	-1.721209561	non
Leucylproline	2.724711966	2.631592181	3.540408041	0.002737416	0.009410968	-1.721502928	up
PE(P-18:0/18:2(9Z,12Z))	0.415816408	5.658226848	3.929581452	0.00120612	0.004902342	-1.722639727	non
TG(16:1(9Z)/18:1(9Z)/18:2(9Z,12Z))	0.590938915	4.246911283	3.807548979	0.001559005	0.005966585	-1.727163752	up
PC(16:0/22:4(7Z,10Z,13Z,16Z))	0.83953084	3.527628497	3.697739858	0.001964709	0.007251359	-1.730664506	up
PC(22:1(13Z)/20:1(11Z))	0.304544701	8.246081471	3.984720463	0.001074268	0.0045077	-1.731298972	non
PE(20:0/P-18:1(11Z))	-1.354924121	2.702324348	-3.567705555	0.002584324	0.00895174	-1.731402761	down
TG(18:0/18:0/18:2(9Z,12Z))	0.406004426	5.74087424	3.931205291	0.001202012	0.00489184	-1.732109447	non
PC(20:4(5Z,8Z,11Z,14Z)/20:2(11Z,14Z))	0.680408179	6.400151768	3.962391631	0.001125812	0.004657989	-1.733141078	up
Tolmetin	-0.867308226	4.689633274	-3.834584324	0.001472774	0.005697685	-1.741204258	down
2-hydroxyoct-2-enoylglycine	0.404925329	4.27403228	3.805974151	0.001564182	0.005979271	-1.741706801	non
Benzthiazide	0.590411039	6.625969655	3.963316024	0.001123629	0.004657989	-1.746612333	up
PC(20:1(11Z)/P-16:0)	0.807631435	6.547709101	3.95914258	0.001133517	0.004672304	-1.74869272	up
PI(18:1(11Z)/18:1(9Z))	0.885391674	5.405578947	3.895159916	0.001296598	0.005183338	-1.749595843	up
Cer(d18:1/22:0)	-0.508761545	3.964378853	-3.750796794	0.001756907	0.00660589	-1.751691157	down
6-Hydroxymethyletoricoxib	0.255208645	9.616900459	3.975274381	0.001095776	0.004581427	-1.758961187	non
Elaidic carnitine	-0.6658962	4.501231746	-3.804162629	0.001570158	0.005994979	-1.772280246	down
PC(22:5(4Z,7Z,10Z,13Z,16Z)/18:1(11Z))	1.303440784	3.265308515	3.624342292	0.002293449	0.008191619	-1.781413157	up
Cinnarizine	-0.934815982	9.15492182	-3.962203729	0.001126256	0.004657989	-1.787091845	down
Acetaminophen	0.239696422	6.629126611	3.944265979	0.001169486	0.004777631	-1.788571164	non
2-Hydroxycinnamic acid	-0.546823613	5.094704647	-3.850431591	0.001424478	0.005571254	-1.793119277	down
13-HODE	0.982406042	8.276759306	3.95047032	0.001154347	0.004727816	-1.803144244	up
Phosphorylcholine	0.323239928	10.01426969	3.954787928	0.001143929	0.004697129	-1.813798742	non
Grepafloxacin	0.234093328	10.4130959	3.961685553	0.001127482	0.004657989	-1.816079514	non
4-Hydroxy-L-glutamic acid	0.22156845	5.515128504	3.873684337	0.001356486	0.005377377	-1.817242806	non
PC(22:5(4Z,7Z,10Z,13Z,16Z)/14:0)	0.429853229	3.68097038	3.683083893	0.002026342	0.007419139	-1.824628957	non
Pseudoephedrine	0.376775007	4.970757738	3.825082441	0.00150252	0.005791826	-1.82903073	non
Biocytin	-1.024858058	4.705734906	-3.789794313	0.001618381	0.00617176	-1.830383204	down
PC(20:3(8Z,11Z,14Z)/18:2(9Z,12Z))	0.871398133	4.234059534	3.74422211	0.001781409	0.006682366	-1.844198263	up
5-Methyltetrahydrofolic acid	0.916668832	3.725093806	3.670030081	0.002082869	0.007588655	-1.847275528	up
DG(18:0/20:0/0:0)	0.221096538	7.897198688	3.923102383	0.00122265	0.004962673	-1.853715746	non
CE(20:5(5Z,8Z,11Z,14Z,17Z))	0.332280689	5.336736739	3.841738202	0.001450771	0.005646578	-1.853723123	non
Moxifloxacin	-1.148795703	8.277258623	-3.922556008	0.001224054	0.004962673	-1.860508999	down
4-hydroxy-5-[4-hydroxy-3-(sulfooxy)phenyl]pentanoic acid	0.455750198	7.460675524	3.914323714	0.001245412	0.005036545	-1.870371669	non
PI(18:0/22:4(10Z,13Z,16Z,19Z))	0.581171229	7.21601907	3.913260734	0.001248197	0.005041459	-1.871642919	up
DG(20:4(5Z,8Z,11Z,14Z)/18:1(9Z)/0:0)	0.358393237	7.452150408	3.912607758	0.001249911	0.005042039	-1.873963643	non
Bleomycin	0.307133893	9.402590246	3.918332121	0.001234966	0.005000599	-1.876222942	non
PI(18:0/20:4(8Z,11Z,14Z,17Z))	-1.044632035	5.675737163	-3.840553965	0.001454391	0.005653811	-1.888373329	down
PC(18:3(6Z,9Z,12Z)/24:1(15Z))	0.7404919	6.806376552	3.899574692	0.001284621	0.005169071	-1.888377582	up
PC(P-18:0/22:4(7Z,10Z,13Z,16Z))	2.970768223	2.761989656	3.462304787	0.0032273	0.010705433	-1.888549035	up
Nimodipine	0.56230917	8.151900424	3.907069768	0.001264543	0.005094664	-1.892992595	up
TG(16:0/16:0/18:1(9Z))	-0.558450675	7.143877479	-3.894700052	0.001297852	0.005183338	-1.906073857	down
Cinoxacin	0.293839648	4.963852025	3.787200768	0.001627243	0.006198194	-1.907608697	non
Streptozocin	-1.089737311	7.820259709	-3.895603977	0.001295388	0.005183338	-1.916932497	down
DG(18:1(9Z)/18:2(9Z,12Z)/0:0)	-0.46926316	6.25815143	-3.867791864	0.0013734	0.005417675	-1.918899363	non
Trihexosylceramide (d18:1/16:0)	0.281236248	9.049352741	3.897987175	0.001288915	0.005173383	-1.9193194	non
(2E)-3-[3-(sulfooxy)phenyl]prop-2-enoic acid	-0.430401291	5.028065232	-3.785013487	0.001634755	0.006212068	-1.920393069	non
Tolazoline	0.219028332	8.452324445	3.894908561	0.001297284	0.005183338	-1.925730342	non
PE(16:1(9Z)/16:0)	3.147160714	2.575267722	3.419862628	0.003529197	0.011504823	-1.926940667	up
PC(20:4(5Z,8Z,11Z,14Z)/P-18:1(9Z))	0.353437161	6.847061989	3.883346793	0.001329203	0.005288812	-1.92788264	non
PC(20:3(8Z,11Z,14Z)/20:0)	0.958117904	9.314421508	3.893456393	0.00130125	0.005190451	-1.931429829	up
N-Phenylacetylphenylalanine	-0.799325933	3.467735605	-3.580282661	0.002516697	0.00874877	-1.937198346	down
4-Aminohippuric acid	0.49525093	5.971434159	3.846810878	0.00143537	0.005604438	-1.939293002	non
Kaempferol	0.594187022	6.430572858	3.859810381	0.00139665	0.005477739	-1.952122646	up
DG(16:1(9Z)/22:4(7Z,10Z,13Z,16Z)/0:0)	0.583687347	5.246297378	3.786324163	0.001630249	0.006202287	-1.954582248	up
PC(16:0/22:0)	0.255238176	5.642854098	3.817278751	0.001527401	0.005873634	-1.957422648	non
DG(20:5(5Z,8Z,11Z,14Z,17Z)/18:0/0:0)	-0.534012258	6.602830661	-3.860153859	0.001395641	0.005477739	-1.958982251	down
PA(18:1(11Z)/18:1(9Z))	2.849337874	2.574803008	3.411701876	0.003590389	0.011650933	-1.962225212	up
Delta-12-Prostaglandin J2	0.373140445	6.791294361	3.864590373	0.001382679	0.005440909	-1.964977913	non
PC(18:1(11Z)/18:1(11Z))	3.05368419	2.704907969	3.415034567	0.003565273	0.011587136	-1.967075998	up
5'-Hydroxytenoxicam	0.980904503	3.687910627	3.601416634	0.002407021	0.008465439	-1.973451913	up
4-Pyridoxic acid	0.326196818	9.254029915	3.869065968	0.001369725	0.005410161	-1.979625273	non
Trimethylsilyl n-pentadecanoic acid	-0.447390512	5.833337871	-3.814102559	0.001537646	0.005905959	-1.983012807	non
CE(22:0)	-1.061994349	6.872973787	-3.846452235	0.001436454	0.005604438	-1.989581644	down
PI(20:3(8Z,11Z,14Z)/16:0)	-1.23431737	9.597498092	-3.869036308	0.00136981	0.005410161	-1.994159732	down
Carbamazepine	-0.85413966	3.789816505	-3.597025648	0.002429408	0.008525496	-1.994968543	down
DG(22:6(4Z,7Z,10Z,13Z,16Z,19Z)/22:6(4Z,7Z,10Z,13Z,16Z,19Z)/0:0)	-0.95068895	6.786052624	-3.839921043	0.001456329	0.0056545	-2.002124394	down
Histidylproline diketopiperazine	0.253180076	9.592379322	3.85905811	0.001398862	0.005477739	-2.00367103	non
5'-Deoxyadenosine	2.34133231	3.476346495	3.492342092	0.003029323	0.010164219	-2.031398838	up
Cefpiramide	1.916687627	1.372419499	3.291111974	0.004627631	0.014329146	-2.032536167	up
Morphine	2.027262022	3.043831909	3.443019613	0.003361151	0.011103555	-2.05222836	up
PG(18:3(9Z,12Z,15Z)/22:6(4Z,7Z,10Z,13Z,16Z,19Z))	0.389357877	4.701740302	3.695475278	0.001974108	0.007277683	-2.057691861	non
Ibutilide	0.320693256	7.418203452	3.824304224	0.001504983	0.005794363	-2.060160815	non
Pantoprazole	-0.541103274	4.369318497	-3.645479738	0.002193496	0.007904954	-2.081065511	down
6-O-Desmethyldonepezil	0.419074585	5.68189492	3.760815443	0.00172022	0.006483131	-2.081605854	non
PC(18:3(6Z,9Z,12Z)/18:2(9Z,12Z))	0.900989818	4.489846508	3.6577314	0.002137571	0.007746885	-2.084469948	up
PC(20:1(11Z)/22:5(7Z,10Z,13Z,16Z,19Z))	0.466804304	7.546637227	3.812808543	0.00154184	0.005914992	-2.08450825	non
PIP2(16:2(9Z,12Z)/16:0)	0.458366807	4.08317544	3.614535144	0.002341361	0.008316495	-2.092290461	non
PC(16:0/16:1(9Z))	-0.783985208	8.516774943	-3.811033031	0.001547613	0.005930055	-2.097517376	down
Chlormerodrin	0.330191129	5.348627928	3.721437454	0.001869008	0.006930006	-2.108656536	non
Hydroxytyrosol	-1.53955375	2.887645662	-3.397417627	0.003700047	0.011928564	-2.111657986	down
PI(18:3(6Z,9Z,12Z)/18:0)	-0.479299216	6.506464415	-3.778554219	0.001657142	0.006282269	-2.126022807	non
PC(16:0/P-18:1(9Z))	1.146744648	4.960508754	3.677261168	0.002051363	0.007502196	-2.130208772	up
DG(16:0/22:6(4Z,7Z,10Z,13Z,16Z,19Z)/0:0)	0.6752378	4.245909262	3.612193505	0.002352949	0.008348418	-2.132187183	up
Urobilinogen	1.006878834	6.090277974	3.751167299	0.001755537	0.00660589	-2.143282212	up
PG(16:1(9Z)/18:1(11Z))	0.387060496	6.307823518	3.764180975	0.00170807	0.006452485	-2.145221059	non
PI(18:1(9Z)/16:0)	0.398327052	6.612536546	3.773851871	0.001673633	0.006329841	-2.146338896	non
LysoPA(18:2(9Z,12Z)/0:0)	1.576240686	2.244447554	3.312530522	0.004423834	0.013858469	-2.151444091	up
DG(18:1(11Z)/22:5(4Z,7Z,10Z,13Z,16Z)/0:0)	0.435486539	5.713266874	3.726238246	0.001850198	0.006876141	-2.159079502	non
DG(22:5(4Z,7Z,10Z,13Z,16Z)/18:2(9Z,12Z)/0:0)	0.424584783	5.092947684	3.676247418	0.002055751	0.00750969	-2.160800512	non
PC(20:1(11Z)/14:1(9Z))	0.302272209	9.357993633	3.782470904	0.00164353	0.006238033	-2.16239139	non
PI(16:0/20:2(11Z,14Z))	-0.656627634	2.900125883	-3.392041036	0.003742179	0.012028165	-2.165199285	down
Pentobarbital	1.766714352	3.347668909	3.433815543	0.003426968	0.011263043	-2.165716818	up
6-hydroxyoct-6-enoylglycine	-2.98498845	1.780125226	-3.223417998	0.005334812	0.016073131	-2.171240801	down
TG(20:0/20:1(11Z)/20:1(11Z))	-0.392766707	5.816048769	-3.722649166	0.001864243	0.006920327	-2.174627957	non
PC(18:0/18:4(6Z,9Z,12Z,15Z))	1.566969626	3.196227408	3.416156694	0.003556855	0.01157671	-2.176312852	up
TG(20:0/20:4(5Z,8Z,11Z,14Z)/20:4(5Z,8Z,11Z,14Z))	0.266749863	5.666018944	3.711322557	0.001909271	0.007062981	-2.184055145	non
Tropicamide	0.189251552	7.772874131	3.76296424	0.001712453	0.00646144	-2.190041712	non
PC(20:1(11Z)/22:5(4Z,7Z,10Z,13Z,16Z))	0.461957538	6.029802695	3.728956007	0.001839634	0.006844803	-2.194259859	non
PC(18:0/16:1(9Z))	-0.73572323	5.747540579	-3.693279137	0.001983266	0.007294694	-2.216880925	down
PC(18:1(11Z)/22:5(4Z,7Z,10Z,13Z,16Z))	-0.62627926	4.881024024	-3.629763734	0.002267386	0.008125642	-2.217313608	down
PC(20:3(5Z,8Z,11Z)/20:3(5Z,8Z,11Z))	-0.632475523	4.485886218	-3.589641748	0.002467524	0.008612195	-2.219776216	down
1,7-Dimethyluric acid	0.481697515	3.845534879	3.516477464	0.002879059	0.009793071	-2.223860536	non
PE(P-18:1(11Z)/18:1(11Z))	1.303038057	2.980446352	3.368830759	0.0039296	0.012517805	-2.226090146	up
DG(18:1(11Z)/20:3(8Z,11Z,14Z)/0:0)	0.302061435	5.299016962	3.659524802	0.002129505	0.007726374	-2.230152778	non
PC(24:0/18:1(9Z))	0.653684363	3.601819892	3.470829864	0.003169835	0.010547504	-2.232600821	up
Dexbrompheniramine	0.819069462	5.332859527	3.654655701	0.002151475	0.007779713	-2.244053194	up
6-Hydroxyfluvastatin	-1.074584144	4.302166778	-3.538337348	0.002749393	0.009442031	-2.246464871	down
Pyrimethamine	0.886628321	3.37047032	3.421329361	0.003518309	0.011480987	-2.249948697	up
4,7-octadienoylglycine	0.439635542	9.844865743	3.744591305	0.001780024	0.006682366	-2.251429888	non
4-Allylphenol sulfate	-0.320180311	7.220702535	-3.732438907	0.001826184	0.006810543	-2.251913544	non
DG(20:0/18:1(9Z)/0:0)	0.648480852	3.54113636	3.451390689	0.003302384	0.010931914	-2.252414296	up
Oxyphenonium	-1.095013134	5.963340847	-3.683257877	0.002025599	0.007419139	-2.254042613	down
PC(22:4(7Z,10Z,13Z,16Z)/14:0)	-1.297145689	5.820396067	-3.668991598	0.002087433	0.00759088	-2.258906902	down
DG(20:3(5Z,8Z,11Z)/18:0/0:0)	-0.655365026	8.526917872	-3.734868806	0.001816859	0.006791542	-2.25898534	down
PC(22:2(13Z,16Z)/14:1(9Z))	3.254311492	2.698585611	3.260096599	0.004939323	0.015133746	-2.26206389	up
LysoPC(18:1(9Z)/0:0)	-1.18601848	3.637065395	-3.428556209	0.003465151	0.011353672	-2.271773979	down
PC(P-18:1(11Z)/20:3(5Z,8Z,11Z))	0.572458083	9.092823377	3.730003382	0.001835579	0.006837638	-2.273514048	up
MG(22:5(7Z,10Z,13Z,16Z,19Z)/0:0/0:0)	0.446751739	5.041234604	3.618490426	0.002321919	0.008274896	-2.273541123	non
PC(22:1(13Z)/20:0)	0.308406299	5.949029596	3.687491106	0.002007607	0.007374799	-2.27402654	non
PC(22:5(7Z,10Z,13Z,16Z,19Z)/14:0)	0.409901755	4.806348942	3.590702765	0.00246201	0.008602301	-2.294320815	non
Cefalotin	0.682991155	5.132051382	3.604638196	0.002390728	0.008435855	-2.316848151	up
Ellagic acid	0.333482473	11.23445534	3.742233071	0.001788889	0.006702595	-2.317215723	non
11-Dehydro-thromboxane B2	0.339477166	5.188312275	3.60735461	0.002377076	0.008415425	-2.320822908	non
Retinoyl b-glucuronide	0.391741255	8.781793192	3.706320154	0.001929503	0.007129614	-2.324852878	non
Zileuton	1.298416813	2.552947393	3.263937608	0.004899623	0.015040812	-2.327315792	up
DG(16:1(9Z)/20:3(8Z,11Z,14Z)/0:0)	-1.449141608	5.331260089	-3.60230973	0.002402493	0.008458779	-2.327583779	down
PC(18:1(9Z)/14:0)	-1.0201913	5.746889483	-3.631299488	0.002260057	0.008108427	-2.337637056	down
Sulfolithocholylglycine	-0.972244788	5.91087414	-3.641829425	0.00221044	0.007957088	-2.338297235	down
PE(20:0/P-18:1(9Z))	-0.65794153	4.463374661	-3.527814333	0.002811068	0.009612714	-2.341923487	down
TG(18:0/18:2(9Z,12Z)/18:2(9Z,12Z))	0.490031791	5.302878291	3.606101389	0.002383365	0.008428396	-2.342486976	non
6-[4-(4-carboxy-2-hydroxybutyl)-2-hydroxyphenoxy]-3,4,5-trihydroxyoxane-2-carboxylic acid	-1.063459638	3.209588521	-3.337911488	0.004193824	0.013202322	-2.347026469	down
PI(16:0/22:3(10Z,13Z,16Z))	0.227809899	8.428065756	3.694717339	0.001977264	0.007280958	-2.347138914	non
DG(20:4(5Z,8Z,11Z,14Z)/20:1(11Z)/0:0)	-1.027118732	4.315229189	-3.489168097	0.003049658	0.01020047	-2.356709802	down
PC(18:3(6Z,9Z,12Z)/18:3(6Z,9Z,12Z))	0.616806438	4.599679136	3.537828012	0.002752346	0.009442077	-2.366370862	up
2-Phenylglycine	1.43545903	3.541729645	3.374089153	0.003886339	0.012404606	-2.368110797	up
FAPy-adenine	-0.744949023	5.677199119	-3.616105789	0.002333621	0.008298182	-2.369353794	down
Tamarixetin	-0.648125657	6.272793774	-3.65013874	0.002172058	0.007845308	-2.374834558	down
PC(18:0/22:4(7Z,10Z,13Z,16Z))	0.97933962	2.52225905	3.237404226	0.005180443	0.015707651	-2.381170622	up
PC(16:1(9Z)/18:2(9Z,12Z))	-2.266286302	4.340391988	-3.411467778	0.003592159	0.011650933	-2.390918772	down
SM(d18:1/24:0)	0.570399332	4.534021276	3.519138222	0.002862956	0.009758971	-2.393803612	up
PC(18:3(6Z,9Z,12Z)/20:1(11Z))	-0.889987123	6.116801513	-3.625817468	0.002286328	0.00818013	-2.401221024	down
PI(16:0/22:5(4Z,7Z,10Z,13Z,16Z))	1.359008605	1.803602854	3.144464014	0.006295277	0.01819454	-2.401316036	up
TG(16:1(9Z)/16:1(9Z)/20:0)	0.30562128	5.419290491	3.585712389	0.002488051	0.008665	-2.405587283	non
PC(16:0/18:3(9Z,12Z,15Z))	-1.989231228	4.961051962	-3.507191224	0.002935973	0.009959553	-2.409208105	down
PC(P-18:1(9Z)/22:5(4Z,7Z,10Z,13Z,16Z))	0.430773232	8.067843979	3.659554769	0.002129371	0.007726374	-2.412276836	non
3,5-dimethoxy-4-(sulfooxy)benzoic acid	1.519857947	4.778725658	3.51758503	0.002872345	0.009780594	-2.412759523	up
MG(20:3(8Z,11Z,14Z)/0:0/0:0)	-0.659828497	4.539806471	-3.500903743	0.002975145	0.010026818	-2.415991769	down
O-Phosphotyrosine	-0.618582955	6.682702993	-3.639304809	0.002222235	0.007981653	-2.42646516	down
3-Methyluric acid	-0.88273542	4.949433794	-3.532628909	0.00278268	0.009525784	-2.427094066	down
Adrenic acid	1.026796115	4.604539668	3.501085885	0.002974003	0.010026818	-2.430428104	up
PI(20:3(8Z,11Z,14Z)/18:1(9Z))	-2.674787998	0.979267595	-3.041613315	0.007805306	0.021520769	-2.431404188	down
cis-Aconitic acid	0.255586862	9.651211669	3.655763195	0.002146458	0.007770322	-2.43299849	non
PC(20:0/18:3(9Z,12Z,15Z))	0.689406215	7.831393032	3.647688244	0.002183307	0.007877078	-2.43451742	up
Dityrosine	-0.963361111	4.740247219	-3.505125081	0.002948788	0.0099838	-2.43724928	down
PG(18:3(6Z,9Z,12Z)/22:6(4Z,7Z,10Z,13Z,16Z,19Z))	0.420098045	7.201705374	3.639373882	0.002221912	0.007981653	-2.44896156	non
PC(18:1(11Z)/P-16:0)	0.727491063	4.073614436	3.432344398	0.003437606	0.011286454	-2.457735652	up
Glyceric acid 1,3-biphosphate	0.581902699	4.873615918	3.515101834	0.00288742	0.009811118	-2.461998818	up
LysoPE(0:0/18:1(9Z))	0.580223668	6.760178919	3.625535944	0.002287685	0.00818013	-2.465290722	up
PC(15:0/22:6(4Z,7Z,10Z,13Z,16Z,19Z))	-2.203770665	4.748221776	-3.437438318	0.00340091	0.011200331	-2.467226583	down
DG(18:3(6Z,9Z,12Z)/22:2(13Z,16Z)/0:0)	-1.064742105	1.83884265	-3.111970509	0.006738332	0.019063245	-2.469757445	down
3-hydroxyhexanoylglycine	-0.608177186	5.966954327	-3.586977608	0.002481423	0.008651301	-2.472997486	down
DG(18:1(11Z)/20:2(11Z,14Z)/0:0)	0.437184944	4.619882483	3.488138486	0.003056283	0.010211993	-2.476351123	non
(3R,3'R,6'R,9'-cis)-beta,epsilon-Carotene-3,3'-diol	-0.50139642	6.363847978	-3.605212603	0.002387835	0.008434915	-2.480038461	down
Vincristine	0.305660739	5.819066491	3.576075316	0.00253912	0.00880466	-2.491239131	non
Carprofen	-1.152922338	7.917910634	-3.622738545	0.002301217	0.008210229	-2.492450135	down
Cer(d18:0/24:0)	0.989142396	4.531942336	3.460380478	0.003240414	0.010737841	-2.50098789	up
Methysergide	-0.295727531	6.0658247	-3.580121208	0.002517553	0.00874877	-2.507077278	non
PC(22:5(4Z,7Z,10Z,13Z,16Z)/16:0)	-0.302768624	4.846143503	-3.490303596	0.003042368	0.010186697	-2.507696889	non
DG(22:2(13Z,16Z)/18:3(6Z,9Z,12Z)/0:0)	-0.889377827	9.586543077	-3.617445195	0.002327041	0.008283956	-2.519543504	down
PC(20:0/22:6(4Z,7Z,10Z,13Z,16Z,19Z))	3.294334483	2.738673751	3.132381332	0.006456574	0.018560482	-2.520753608	up
PC(18:3(6Z,9Z,12Z)/20:0)	0.802322916	4.421040092	3.441349905	0.003372997	0.011131236	-2.52456589	up
Deoxyadenosine triphosphate	-0.910569861	1.418927789	-3.045306266	0.007745395	0.021384748	-2.52805772	down
Cytidine	0.41061583	8.392868505	3.607403074	0.002376833	0.008415425	-2.529584871	non
PC(16:0/P-16:0)	-2.082750381	3.528981592	-3.247849387	0.005068045	0.015454408	-2.529697486	down
Atenolol	0.339220302	4.641709778	3.463901664	0.003216457	0.010680501	-2.531561638	non
Eriodictyol	0.285576396	5.682803923	3.546390754	0.002703106	0.009312955	-2.532760703	non
PC(22:1(13Z)/20:3(8Z,11Z,14Z))	0.639550053	8.01596086	3.597916201	0.002424851	0.008518814	-2.541553113	up
Prazosin	-0.803983596	9.422787602	-3.603798192	0.002394966	0.008441532	-2.544717174	down
MG(0:0/15:0/0:0)	-0.901462886	7.411580503	-3.591977858	0.0024554	0.008597918	-2.54693819	down
Hypogeic acid	-0.83086628	7.392024248	-3.591145601	0.002459713	0.008602301	-2.548581023	down
Olmesartan	0.210272922	9.705602747	3.595245746	0.002438542	0.008548206	-2.561352336	non
DG(22:1(13Z)/16:0/0:0)	1.512837497	2.839813938	3.180157724	0.005841609	0.0171192	-2.561446421	up
DG(20:1(11Z)/14:0/0:0)	-2.455828906	5.866694553	-3.496559442	0.003002514	0.010095363	-2.570758993	down
PI(16:0/20:3(8Z,11Z,14Z))	1.412238663	2.140764462	3.086143811	0.007112228	0.019962731	-2.582378692	up
DG(18:0/18:1(9Z)/0:0)	0.976193358	1.539071989	3.028310104	0.008024913	0.021986344	-2.586877101	up
Anabasine	0.259942458	5.308797049	3.481187348	0.00310139	0.010351938	-2.605056148	non
Brimonidine	0.230712592	10.21115153	3.576086392	0.002539061	0.00880466	-2.619384388	non
PC(20:3(8Z,11Z,14Z)/18:3(9Z,12Z,15Z))	-0.420524081	8.066728573	-3.55696993	0.002643484	0.009146797	-2.629146532	non
Anserine	0.385973128	7.095333335	3.546578077	0.002702039	0.009312955	-2.642865554	non
Nicotine	0.457033777	8.736657165	3.553565236	0.002662527	0.009202772	-2.645718884	non
DG(20:1(11Z)/20:5(5Z,8Z,11Z,14Z,17Z)/0:0)	0.58976406	5.90189638	3.504821219	0.002950678	0.0099838	-2.647465365	up
Octadecenoylcarnitine	-0.622880201	3.293968838	-3.207908219	0.005511313	0.016385949	-2.657528646	down
Linoleyl carnitine	-0.56810617	7.691276494	-3.540796472	0.002735176	0.009410968	-2.658868728	down
TG(16:0/18:0/18:1(9Z))	-0.538149094	7.127253402	-3.536219397	0.002761696	0.009464041	-2.660037636	down
PE(14:0/16:0)	0.433110799	3.325301151	3.216979061	0.005407399	0.016196975	-2.664950156	non
PE(20:4(5Z,8Z,11Z,14Z)/20:0)	3.228147949	2.070966915	2.997066029	0.008564753	0.023142871	-2.665354255	up
Pyridoxamine	0.432770054	3.727505059	3.283103431	0.004706198	0.014531909	-2.667987198	non
5-alpha-Dihydrotestosterone glucuronide	1.055611974	6.75041859	3.525206974	0.002826562	0.009655414	-2.668105954	up
Phentermine	1.009371701	6.603450306	3.519832704	0.002858767	0.00975505	-2.673231832	up
PC(14:0/22:1(13Z))	-1.062977451	4.401112006	-3.34434774	0.004137407	0.013075999	-2.676804677	down
PI(20:1(11Z)/20:4(8Z,11Z,14Z,17Z))	-0.875287203	6.110225136	-3.49182922	0.0030326	0.010164591	-2.681649008	down
Travoprost	-1.031293727	10.39316694	-3.548389943	0.002691737	0.009293729	-2.687134888	down
Gentian Violet	-0.727286953	3.650857437	-3.239965986	0.00515265	0.015652943	-2.697960638	down
Adapalene	0.381575109	6.330771601	3.501518945	0.002971289	0.010026818	-2.698498194	non
PC(18:4(6Z,9Z,12Z,15Z)/24:0)	0.411794349	6.109070584	3.492504676	0.003028285	0.010164219	-2.698711852	non
DG(20:5(5Z,8Z,11Z,14Z,17Z)/18:1(9Z)/0:0)	-0.801733003	5.434987674	-3.43884313	0.003390859	0.011178694	-2.705700616	down
DG(18:4(6Z,9Z,12Z,15Z)/20:1(11Z)/0:0)	0.30349599	5.91757723	3.479378987	0.003113233	0.010380677	-2.706480166	non
PE(18:2(9Z,12Z)/22:2(13Z,16Z))	1.578096725	2.734273103	3.084902423	0.007130704	0.01999711	-2.720837929	up
3,4,5-trihydroxy-6-{4-[(E)-2-(3-hydroxy-5-{[3,4,5-trihydroxy-6-(hydroxymethyl)oxan-2-yl]oxy}phenyl)ethenyl]phenoxy}oxane-2-carboxylic acid	0.340143274	5.10159434	3.405481294	0.00363774	0.011747705	-2.727975633	non
PC(20:2(11Z,14Z)/16:1(9Z))	0.776221869	5.667402839	3.447854138	0.003327086	0.01100234	-2.729575194	up
DG(20:5(5Z,8Z,11Z,14Z,17Z)/16:1(9Z)/0:0)	0.564611778	7.928136073	3.506975579	0.002937308	0.009959553	-2.730377362	up
GlcCer(d18:1/24:1(15Z))	-1.051955952	3.050398605	-3.122067375	0.006597471	0.018865797	-2.738275952	down
DG(22:4(7Z,10Z,13Z,16Z)/18:0/0:0)	-2.253935337	7.938996431	-3.500786145	0.002975882	0.010026818	-2.739854099	down
TG(16:1(9Z)/16:1(9Z)/18:1(9Z))	-0.998592995	2.778891603	-3.07848369	0.007226992	0.020214173	-2.753296679	down
PI(18:0/18:2(9Z,12Z))	3.500495832	1.310457722	2.880176332	0.010917335	0.028044451	-2.758449099	up
PE(20:4(5Z,8Z,11Z,14Z)/20:1(11Z))	-0.63730669	4.232864727	-3.296507461	0.004575433	0.014194895	-2.763828952	down
Glycochenodeoxycholate-3-sulfate	0.421938832	5.009861648	3.37873841	0.003848483	0.012295997	-2.76869801	non
DG(20:2(11Z,14Z)/18:4(6Z,9Z,12Z,15Z)/0:0)	-2.354543664	6.302012911	-3.425842105	0.00348502	0.01139552	-2.770752806	down
7,9-Dimethyluric acid	-0.888410129	4.697534992	-3.341604625	0.004161359	0.013138765	-2.770823011	down
cis-4-Octenedioic acid	-0.595876448	10.08254145	-3.49948206	0.002984074	0.010043879	-2.776564345	down
Tetrahydrocannabinol	0.227924064	6.700029116	3.472117696	0.003161244	0.010529828	-2.785416022	non
Isorhamnetin	0.201052005	7.326216665	3.466182933	0.003201031	0.01064028	-2.812535728	non
PE(20:2(11Z,14Z)/16:0)	1.80663605	2.327036177	2.972873433	0.009007007	0.02402118	-2.833918618	up
TG(16:0/16:0/18:0)	-0.818162108	5.186362087	-3.353446736	0.004058933	0.012875448	-2.844471355	down
DG(18:3(6Z,9Z,12Z)/18:3(6Z,9Z,12Z)/0:0)	0.448960598	5.564930796	3.382303216	0.003819705	0.012240591	-2.854663849	non
PC(18:0/14:1(9Z))	-2.516089907	4.644912108	-3.213514682	0.005446856	0.016262819	-2.857593757	down
PC(18:0/20:3(8Z,11Z,14Z))	3.155684585	1.52186382	2.849218708	0.011639117	0.029549341	-2.859517699	up
Tetrahydrobiopterin	-0.406992397	5.356568489	-3.361156359	0.003993599	0.012696481	-2.860988693	non
PC(18:3(9Z,12Z,15Z)/P-18:1(11Z))	0.271268379	6.556891296	3.429075122	0.003461365	0.011352851	-2.866448488	non
PC(14:0/22:5(4Z,7Z,10Z,13Z,16Z))	-2.296452258	5.261194739	-3.30477393	0.00449659	0.014004413	-2.872370234	down
Raloxifene	1.664169186	3.176996967	3.066778378	0.00740588	0.02060683	-2.873271885	up
DG(18:3(6Z,9Z,12Z)/18:3(9Z,12Z,15Z)/0:0)	-1.00014812	5.309479101	-3.34692182	0.004115056	0.013018171	-2.873823244	down
Cysteinylglycine	0.511267965	4.721967721	3.302694969	0.004516291	0.014052141	-2.878335008	up
Tetrahexosylceramide (d18:1/26:0)	0.319643576	6.703633494	3.426786213	0.003478096	0.011384471	-2.880078087	non
DG(20:0/14:1(9Z)/0:0)	0.497337988	4.118863784	3.238032377	0.005173614	0.015701773	-2.881165349	non
DG(16:1(9Z)/20:4(8Z,11Z,14Z,17Z)/0:0)	-2.304975014	8.459068512	-3.435046101	0.003418094	0.011245391	-2.887009354	down
Nonate	-0.621388834	4.234266367	-3.234583534	0.005211216	0.015771173	-2.893294967	down
2-Hydroxychlorpropamide	0.357999975	5.372769229	3.347357741	0.004111282	0.013018171	-2.894525106	non
Pyridostigmine	0.241753763	6.06781248	3.396635326	0.003706148	0.011936249	-2.895687411	non
Formononetin	-0.807706554	5.250362967	-3.332227454	0.004244281	0.013347335	-2.899191128	down
DG(18:1(9Z)/16:0/0:0)	-0.635425994	4.138289952	-3.215339949	0.005426032	0.016222521	-2.905107494	down
DG(20:4(8Z,11Z,14Z,17Z)/20:3(5Z,8Z,11Z)/0:0)	-1.86929652	3.926553153	-3.120162738	0.006623819	0.018884252	-2.9134783	down
LysoPA(16:0/0:0)	-1.969311969	4.810771755	-3.243185509	0.005117931	0.015576943	-2.915498516	down
CE(20:3(8Z,11Z,14Z))	0.21466878	5.960535901	3.380829768	0.003831574	0.012266383	-2.917506901	non
Famotidine	-0.474183043	4.769438498	-3.282056924	0.004716562	0.014531909	-2.923240848	non
DG(18:2(9Z,12Z)/14:1(9Z)/0:0)	-2.339615552	9.40162215	-3.425040686	0.003490909	0.011403163	-2.929964623	down
PC(20:3(8Z,11Z,14Z)/20:3(8Z,11Z,14Z))	0.768226767	5.414811317	3.331788592	0.004248202	0.013347335	-2.931654903	up
DG(22:4(7Z,10Z,13Z,16Z)/16:0/0:0)	-1.065319177	4.88722357	-3.279841615	0.004738575	0.014574294	-2.933006439	down
PE(14:1(9Z)/22:1(13Z))	0.28499608	3.978119263	3.193139305	0.005684736	0.016761879	-2.93687029	non
Isradipine	0.185748636	7.082592084	3.405494051	0.003637642	0.011747705	-2.937997405	non
Fluvoxamine	0.470799143	7.748837209	3.405148788	0.003640289	0.011747705	-2.940780411	non
DG(18:1(11Z)/16:0/0:0)	-0.330054503	6.334972512	-3.383757001	0.00380803	0.01222442	-2.942875641	non
Nicotinic acid ribonucleoside	-2.532148124	8.704237926	-3.409641501	0.003606004	0.011684035	-2.945870081	down
Farnesol	0.47085288	5.388624111	3.320046705	0.004354446	0.013667769	-2.953540561	non
PC(24:1(15Z)/14:0)	0.293563253	6.855457692	3.394789055	0.003720586	0.011970742	-2.954158053	non
N-Acetylneuraminate 9-phosphate	-0.893280585	4.480202522	-3.222408608	0.005346127	0.016088485	-2.963146937	down
PE(16:0/20:1(11Z))	3.153089591	2.158948658	2.851961612	0.011573339	0.029493643	-2.96462407	up
Chlorogenic acid	-0.317491953	4.905767046	-3.273463932	0.004802518	0.014756827	-2.967865547	non
Leukotriene D4	0.309807633	6.967264566	3.383405261	0.003810852	0.01222442	-2.981631564	non
DG(22:0/14:0/0:0)	0.663504064	4.128108529	3.186438297	0.005765187	0.016952394	-2.983614573	up
DG(14:0/20:1(11Z)/0:0)	0.270406056	5.132842519	3.281683183	0.004720268	0.014531909	-2.989757464	non
Progesterone	-0.600259008	7.483041716	-3.379316465	0.003843801	0.012293273	-2.993973202	down
Meropenem	-0.821362651	4.500912802	-3.212001734	0.005464176	0.016262819	-2.995841635	down
PC(22:0/18:4(6Z,9Z,12Z,15Z))	-0.514559892	6.881749732	-3.369071128	0.003927612	0.012517805	-3.002037476	down
MG(20:0/0:0/0:0)	0.568016993	4.180826265	3.177438533	0.005875006	0.017165486	-3.019735511	up
Trihexosylceramide (d18:1/24:1(15Z))	0.205887775	11.5741423	3.408396515	0.003615472	0.011702905	-3.033664929	non
Isodeoxycholic acid	-1.076456768	7.881037367	-3.36279532	0.003979845	0.012665294	-3.03580449	down
PG(18:3(6Z,9Z,12Z)/22:4(7Z,10Z,13Z,16Z))	-1.481258869	2.019382197	-2.830441387	0.012099267	0.030423452	-3.038512057	down
DG(22:2(13Z,16Z)/16:1(9Z)/0:0)	-0.877467589	4.933648087	-3.233100357	0.005227469	0.015803627	-3.045959219	down
DG(18:2(9Z,12Z)/20:1(11Z)/0:0)	-0.44246057	5.0348293	-3.242114825	0.005129451	0.015597224	-3.053585418	non
Guanosine monophosphate	0.422956425	5.933384957	3.311374329	0.004434604	0.013878669	-3.057123693	non
PC(14:1(9Z)/22:5(7Z,10Z,13Z,16Z,19Z))	0.304487994	12.42992479	3.415942658	0.003558459	0.01157671	-3.057156333	non
PC(P-18:1(11Z)/20:2(11Z,14Z))	0.547508762	9.101926264	3.353837474	0.004055596	0.012875448	-3.061441554	up
Hydrochlorothiazide	0.46990186	4.570519506	3.200480192	0.005597873	0.016593184	-3.062290429	non
PC(14:1(9Z)/18:0)	-1.91231895	4.027845386	-3.056636038	0.00756439	0.020988144	-3.066012506	down
LysoPE(15:0/0:0)	0.645482291	4.874387086	3.22331017	0.005336019	0.016073131	-3.066571999	up
PG(16:0/18:3(6Z,9Z,12Z))	0.288791644	5.949122511	3.306698641	0.004478426	0.013967361	-3.06986306	non
PE(22:0/16:1(9Z))	-0.411884282	7.034440079	-3.338417453	0.004189361	0.013201216	-3.072172492	non
PC(20:1(11Z)/18:0)	-0.309148478	7.796113963	-3.339492744	0.004179893	0.013184319	-3.078784155	non
DG(20:0/20:4(5Z,8Z,11Z,14Z)/0:0)	0.667762213	3.738059788	3.078842264	0.007221579	0.020214173	-3.080524679	up
PC(P-18:1(9Z)/20:4(5Z,8Z,11Z,14Z))	0.204894008	5.831105084	3.293514816	0.004604313	0.014270703	-3.082165048	non
PE(18:1(11Z)/P-18:1(11Z))	0.262638862	5.694588865	3.281943438	0.004717687	0.014531909	-3.085374864	non
PE(16:0/22:2(13Z,16Z))	-0.869499436	5.497768826	-3.256956593	0.004972014	0.015219386	-3.089826633	down
PE(22:2(13Z,16Z)/18:3(9Z,12Z,15Z))	0.644277503	3.373034427	3.010915654	0.008321208	0.022605243	-3.093512975	up
PE(20:1(11Z)/20:3(8Z,11Z,14Z))	-0.596589895	3.256268978	-2.982567726	0.008827173	0.023600376	-3.100022093	down
Nitroprusside	0.566397201	4.230760818	3.142958545	0.006315156	0.018219196	-3.103247442	up
PE(18:1(11Z)/18:1(11Z))	0.482100565	4.047717167	3.11336853	0.006718653	0.019041125	-3.116502298	non
11-Ketoetiocholanolone	-0.308632514	6.392055237	-3.29734939	0.004567341	0.014188493	-3.126846818	non
Naftifine	-0.572109348	11.27640205	-3.353097069	0.004061921	0.012875448	-3.134517554	down
PI(16:0/20:0)	-0.412049608	7.062719919	-3.307723731	0.004468782	0.013958424	-3.136620383	non
1-Methylinosine	0.581618963	2.994185671	2.925988228	0.009928485	0.025966814	-3.140301452	up
PC(P-16:0/18:3(9Z,12Z,15Z))	0.620964442	4.509557521	3.155019575	0.006157618	0.017844864	-3.140456144	up
all-trans-Phytofluene	0.455346408	4.163816956	3.117338295	0.006663082	0.01893116	-3.141257697	non
PC(P-16:0/14:0)	-0.676592108	4.439162851	-3.136062308	0.006407009	0.018451036	-3.144638711	down
SM(d16:1/24:1(15Z))	0.604382259	7.580223004	3.306495168	0.004480343	0.013967361	-3.145429598	up
Tuftsin	-0.951170556	4.747987384	-3.158938667	0.006107265	0.017734752	-3.155392673	down
DG(18:2(9Z,12Z)/18:1(9Z)/0:0)	0.566702097	4.238170884	3.118175208	0.006651424	0.018924719	-3.155828647	up
4-hydroxyoct-5-enoylglycine	-0.902419876	4.090299552	-3.073455944	0.007303303	0.020374376	-3.158181814	down
PC(24:1(15Z)/P-18:0)	-1.444963757	2.794624279	-2.862568684	0.011322347	0.028899887	-3.16498728	down
PC(18:1(11Z)/18:1(9Z))	-2.139649517	4.45849432	-3.056340055	0.007569066	0.020988144	-3.168168991	down
PC(24:0/18:2(9Z,12Z))	0.446900171	2.674485616	2.863858614	0.011292187	0.028845834	-3.170101296	non
Sotalol	-1.529529264	7.108983989	-3.283020809	0.004707015	0.014531909	-3.171134211	down
PE(22:1(13Z)/14:0)	0.443098663	4.173928027	3.102941891	0.00686679	0.019375451	-3.173704657	non
7-Methylxanthine	0.904676972	5.139906341	3.192007674	0.005698244	0.016786294	-3.174092738	up
Cer(d18:0/18:0)	0.611142853	3.575260058	3.00481875	0.008427575	0.022836239	-3.176030249	up
DG(20:1(11Z)/18:4(6Z,9Z,12Z,15Z)/0:0)	0.317122985	9.001153156	3.297181756	0.004568951	0.014188493	-3.179400687	non
PC(18:2(9Z,12Z)/20:4(5Z,8Z,11Z,14Z))	0.628906563	6.846038932	3.28380952	0.004699218	0.014531909	-3.181846563	up
3,4-Dihydroxyphenylglycol O-sulfate	-0.608118933	5.307942116	-3.200155661	0.005601685	0.016593184	-3.183924451	down
PI(20:3(5Z,8Z,11Z)/18:1(9Z))	-0.507052106	4.254903672	-3.098788056	0.006926696	0.019493096	-3.184369478	down
20-Hydroxy-leukotriene B4	1.694506201	4.745869828	3.12671131	0.006533661	0.018731772	-3.201780266	up
PC(20:3(5Z,8Z,11Z)/20:3(8Z,11Z,14Z))	-0.325785827	10.97916886	-3.313247875	0.004417164	0.013851089	-3.203628077	non
PC(14:1(9Z)/18:3(9Z,12Z,15Z))	-1.808330435	3.56525008	-2.929222589	0.009862068	0.025850694	-3.205660832	down
DG(18:3(6Z,9Z,12Z)/18:1(11Z)/0:0)	-0.567586916	10.82169875	-3.307791557	0.004468145	0.013958424	-3.207450746	down
Griseofulvin	0.297432656	5.698001682	3.212160428	0.005462357	0.016262819	-3.22992117	non
PG(18:1(9Z)/18:3(9Z,12Z,15Z))	-1.955589008	5.032404236	-3.119860233	0.006628014	0.018884252	-3.237153239	down
DG(14:1(9Z)/18:1(9Z)/0:0)	-0.836260963	5.991096289	-3.217724183	0.005398949	0.016196975	-3.237334597	down
gamma-Carotene	0.509221748	6.806290468	3.255075652	0.004991699	0.01526509	-3.240953622	up
PC(P-18:0/24:1(15Z))	1.165550577	8.191456099	3.260409945	0.004936072	0.015133746	-3.248970504	up
DG(14:1(9Z)/20:2(11Z,14Z)/0:0)	0.540603705	4.511454704	3.100963583	0.006895257	0.019438693	-3.253051034	up
Vanylglycol	-0.911923475	7.286082973	-3.250491136	0.005040002	0.01539814	-3.255024426	down
PI(18:0/22:4(7Z,10Z,13Z,16Z))	-0.512439555	6.761491706	-3.243738643	0.005111989	0.015573621	-3.257139004	down
PC(20:0/16:1(9Z))	3.32523033	1.830868515	2.657848523	0.017239952	0.040554934	-3.259631496	up
Amcinonide	0.186573669	7.076735062	3.248475262	0.005061387	0.015448777	-3.263956068	non
5alpha-Pregnan-3beta,20alpha-diol disulfate	-3.009347455	2.881690976	-2.760230114	0.013981172	0.034296061	-3.265786179	down
PC(20:2(11Z,14Z)/18:4(6Z,9Z,12Z,15Z))	0.311188882	5.570845736	3.177432833	0.005875076	0.017165486	-3.280010766	non
5-cis-Lycopene	1.042769106	3.885562373	2.992004649	0.008655485	0.023316077	-3.280542931	up
2,4,6-trihydroxybenzaldehyde	-0.936618201	4.510430311	-3.069746583	0.007360111	0.020497239	-3.281778592	down
PC(18:1(11Z)/20:3(5Z,8Z,11Z))	0.927831971	4.173807287	3.038117514	0.007862437	0.021652045	-3.282115364	up
Substance P	-0.205234889	7.643128972	-3.232259617	0.005236705	0.015803627	-3.299312531	non
Cer(d18:0/14:0)	0.578698591	5.774813941	3.181729458	0.005822391	0.017089303	-3.30095923	up
DG(20:1(11Z)/18:0/0:0)	0.857400479	5.796327467	3.179085409	0.005854757	0.017137305	-3.30272553	up
TG(18:1(9Z)/18:2(9Z,12Z)/20:1(11Z))	0.384144947	8.248320069	3.234798691	0.005208862	0.015771173	-3.303072589	non
Tetrahydrofolic acid	0.283674411	6.039624696	3.197089828	0.005637826	0.01668446	-3.306189908	non
PC(20:3(8Z,11Z,14Z)/14:1(9Z))	0.513331973	6.113605432	3.195525494	0.005656356	0.016708885	-3.314959675	up
MG(0:0/22:2(13Z,16Z)/0:0)	0.59978728	6.832820677	3.219130628	0.005383036	0.01618439	-3.315398688	up
Acitretin	0.267984159	4.831686793	3.099135874	0.006921661	0.019493096	-3.316332218	non
Monoethyl phthalate	0.648961343	5.255919019	3.130280096	0.006485036	0.018625627	-3.321248507	up
DG(20:3(8Z,11Z,14Z)/16:1(9Z)/0:0)	0.617753597	3.007397446	2.835969495	0.011961995	0.030220273	-3.321301579	up
PC(14:0/20:2(11Z,14Z))	0.315306824	6.41984997	3.202418165	0.005575161	0.016547332	-3.326815506	non
TG(18:1(9Z)/18:2(9Z,12Z)/18:2(9Z,12Z))	0.415494295	4.60655325	3.073481513	0.007302913	0.020374376	-3.329107904	non
Pelargonidin	0.222773685	7.476100936	3.217397321	0.005402654	0.016196975	-3.329320388	non
PC(20:2(11Z,14Z)/18:1(11Z))	0.329687128	7.79397233	3.215955276	0.005419029	0.016216685	-3.333307847	non
Oleic acid	-0.261565434	10.25745609	-3.232616471	0.005232783	0.015803627	-3.337564427	non
DG(18:2(9Z,12Z)/18:4(6Z,9Z,12Z,15Z)/0:0)	-0.277562014	5.087233771	-3.105722617	0.006826972	0.019297013	-3.343281179	non
DG(20:3(8Z,11Z,14Z)/18:0/0:0)	-0.447450652	8.886241836	-3.21775177	0.005398637	0.016196975	-3.343711944	non
5-Keto-D-gluconate	0.523861893	5.846103837	3.16555925	0.006023125	0.017564321	-3.345188391	up
Citalopram	-0.660135544	8.079973677	-3.212406127	0.005459541	0.016262819	-3.347466566	down
PC(20:5(5Z,8Z,11Z,14Z,17Z)/22:1(13Z))	-0.405645492	3.992569705	-2.983378327	0.008812296	0.023580234	-3.347949627	non
PC(20:4(5Z,8Z,11Z,14Z)/20:1(11Z))	0.230553673	6.752026914	3.202355026	0.005575899	0.016547332	-3.348437685	non
D-threo-Isocitric acid	0.791242863	6.528614617	3.193534091	0.00568003	0.016761879	-3.350010325	up
Pentacosanoic acid	1.019066174	4.414770319	3.03084684	0.007982575	0.021889025	-3.355590296	up
TG(16:1(9Z)/16:1(9Z)/18:2(9Z,12Z))	0.281185746	9.6023935	3.211944375	0.005464834	0.016262819	-3.357853459	non
PC(18:0/20:0)	-2.049941196	3.899817609	-2.883283946	0.010847331	0.027900162	-3.361115009	down
Lacto-n-fucopentaose I	-0.306355952	6.436611158	-3.185423214	0.005777471	0.016972974	-3.361330607	non
PC(18:1(9Z)/18:2(9Z,12Z))	-0.450541713	7.555524169	-3.196661721	0.005642891	0.01668446	-3.372923831	non
PC(18:3(6Z,9Z,12Z)/16:1(9Z))	0.428588671	4.834573322	3.066087481	0.007416574	0.020618717	-3.383483934	non
DG(22:6(4Z,7Z,10Z,13Z,16Z,19Z)/16:0/0:0)	0.30967874	5.228613938	3.097310317	0.006948132	0.019536297	-3.384586066	non
PC(P-18:1(9Z)/24:0)	0.61550589	5.488978533	3.116981329	0.00666806	0.01893116	-3.387975286	up
MG(0:0/20:3(5Z,8Z,11Z)/0:0)	-0.383251038	6.960092261	-3.180024603	0.00584324	0.0171192	-3.398096402	non
LysoPE(16:0/0:0)	-1.207002821	0.409399376	-2.489230075	0.024249209	0.052789296	-3.39832747	down
PC(24:1(15Z)/18:0)	0.352939013	5.541177668	3.116282187	0.006677822	0.018942125	-3.400153695	non
5-hydroxyoct-2-enoylglycine	-0.510941637	3.735058453	-2.911862532	0.010223698	0.026581614	-3.403132203	down
PC(20:3(8Z,11Z,14Z)/18:0)	0.592058219	7.758886194	3.176030233	0.005892376	0.017200381	-3.416000743	up
PI(18:2(9Z,12Z)/22:2(13Z,16Z))	-0.882812163	6.82442684	-3.163258135	0.006052239	0.017618985	-3.418522198	down
Argininosuccinic acid	-1.29375893	6.660321074	-3.143836204	0.006303559	0.018202094	-3.439935426	down
Ethotoin	0.342366677	3.816429322	2.917527455	0.010104293	0.026299335	-3.441362355	non
Tolcapone	0.219743072	6.692039582	3.155473548	0.006151764	0.017844006	-3.441689356	non
PC(18:0/20:1(11Z))	-0.365572432	3.456891743	-2.848261303	0.011662162	0.02957915	-3.441974244	non
Estrone sulfate	0.921878709	5.065524129	3.053609229	0.007612337	0.021071735	-3.44423232	up
E,e-Carotene-3,3'-dione	0.181375941	5.837735079	3.117989854	0.006654004	0.018924719	-3.444544187	non
DG(16:1(9Z)/18:3(6Z,9Z,12Z)/0:0)	0.356616635	8.315899795	3.165173816	0.006027992	0.017564321	-3.448393416	non
PC(20:3(8Z,11Z,14Z)/14:0)	-0.242536833	7.954880496	-3.159079839	0.006105459	0.017734752	-3.453505123	non
PI(20:3(8Z,11Z,14Z)/18:2(9Z,12Z))	0.612051892	4.705990951	3.010188558	0.008333823	0.022620377	-3.472827253	up
1,5-octadienoylglycine	0.376813732	4.994631773	3.034936863	0.007914773	0.02175885	-3.472893644	non
PC(20:3(5Z,8Z,11Z)/18:1(11Z))	0.458024672	5.546467685	3.079819905	0.007206842	0.020192994	-3.474925607	non
DG(24:0/14:1(9Z)/0:0)	-1.676114677	3.720489444	-2.820465357	0.012350865	0.030840192	-3.475957148	down
Uridine 2',3'-cyclic phosphate	0.605672342	3.302441548	2.804939928	0.012752535	0.031718351	-3.478663311	up
D-Mannose	0.277849225	8.349031827	3.150587402	0.006215054	0.017978865	-3.479290176	non
Clozapine	0.277849225	8.349031827	3.150587402	0.006215054	0.017978865	-3.479290176	non
m-Chlorobenzoic acid	0.267691445	6.343197183	3.120460459	0.006619694	0.018884252	-3.489450376	non
PC(18:2(9Z,12Z)/18:2(9Z,12Z))	-1.705426082	2.840752224	-2.684494901	0.016327603	0.039037925	-3.503776574	down
Protocatechuic acid	-0.717501909	5.392247605	-3.048004039	0.007701914	0.021282999	-3.506673021	down
Etoposide	0.215547191	8.078893881	3.133085876	0.006447058	0.018549734	-3.508042362	non
m-Coumaric acid	1.103795902	3.626105092	2.832758589	0.012041542	0.030339076	-3.511235004	up
DG(20:3(8Z,11Z,14Z)/20:1(11Z)/0:0)	-0.623170038	5.119716889	-3.021077122	0.008146842	0.022244482	-3.51844274	down
DG(22:1(13Z)/16:1(9Z)/0:0)	-1.914127638	0.019680461	-2.401397955	0.028900098	0.060811413	-3.525045419	down
Miglustat	0.406723569	7.280190877	3.122026568	0.006598035	0.018865797	-3.525385223	non
TG(18:2(9Z,12Z)/20:0/20:0)	0.668121898	4.007362785	2.900270208	0.010472337	0.027118286	-3.526459537	up
Furosemide	0.252022907	9.59808769	3.129515303	0.006495426	0.018638797	-3.527296856	non
Acetyldigitoxin	2.128193741	2.907952205	2.681437271	0.016429888	0.039165827	-3.527685076	up
GlcCer(d18:1/22:0)	-0.835564268	5.262321115	-3.026342448	0.008057904	0.022039124	-3.528527206	down
TG(16:1(9Z)/18:2(9Z,12Z)/20:0)	-0.502750653	8.065724802	-3.123852909	0.006572865	0.018827359	-3.528924029	down
Sulfasalazine	1.042904996	5.153641273	3.0142323	0.008263898	0.022468566	-3.537951289	up
N-Acetylleucine	0.350328132	8.998588976	3.121477947	0.006605614	0.018870665	-3.541763104	non
2-Phenylpropionate	-0.645573148	3.82563098	-2.850527499	0.011607685	0.029549341	-3.545203764	down
PG(18:1(9Z)/20:3(5Z,8Z,11Z))	-1.14525161	5.438191902	-3.023849227	0.008099899	0.022135128	-3.551576418	down
PC(18:4(6Z,9Z,12Z,15Z)/18:2(9Z,12Z))	-0.594322241	4.359292374	-2.925884192	0.009930628	0.025966814	-3.554948501	down
PC(20:5(5Z,8Z,11Z,14Z,17Z)/16:0)	0.283625515	5.507379867	3.035354699	0.007907878	0.021758524	-3.559512347	non
Eicosanoic acid, trimethylsilyl ester	-0.40709828	9.674981935	-3.112012273	0.006737743	0.019063245	-3.567061781	non
PI(18:1(9Z)/20:3(8Z,11Z,14Z))	-0.30037729	12.0042128	-3.158836291	0.006108576	0.017734752	-3.570624276	non
PC(16:1(9Z)/20:5(5Z,8Z,11Z,14Z,17Z))	-1.814553881	2.342920475	-2.576056038	0.020355946	0.046062679	-3.577539729	down
6-(4-carboxy-2-hydroxyphenoxy)-3,4,5-trihydroxyoxane-2-carboxylic acid	0.247568081	6.310642272	3.074710329	0.00728419	0.020356428	-3.580483137	non
N-Desmethylcitalopram	0.17710701	13.40416063	3.18654423	0.005763906	0.016952394	-3.580697657	non
Isoleucylproline	0.425672401	4.107948168	2.888814599	0.010723823	0.027635791	-3.5877358	non
DG(14:0/20:4(5Z,8Z,11Z,14Z)/0:0)	-0.384529378	7.301839096	-3.089171469	0.007067363	0.019854158	-3.591599204	non
Clomocycline	0.338969024	11.88676127	3.142491327	0.006321337	0.01822066	-3.598963493	non
PC(16:1(9Z)/18:3(6Z,9Z,12Z))	-1.57295384	4.119587795	-2.820968799	0.012338047	0.030840192	-3.602203628	down
DG(20:0/16:1(9Z)/0:0)	1.221855532	1.938958859	2.531219507	0.0222854	0.049219158	-3.603775319	up
Isoetharine	0.26453783	5.451418966	3.008456938	0.008363944	0.022682958	-3.604284728	non
Ramipril	-0.961047247	10.4779663	-3.104935623	0.006838218	0.019311802	-3.610712646	down
3-Methoxybenzenepropanoic acid	0.486484663	4.942737372	2.959678944	0.009257534	0.024506135	-3.616385215	non
DG(18:4(6Z,9Z,12Z,15Z)/20:0/0:0)	0.460251756	3.567037808	2.783159245	0.013337426	0.032892839	-3.617301729	non
PC(18:1(11Z)/P-18:1(9Z))	-1.49929	2.790288802	-2.624427635	0.018453574	0.042690508	-3.617588073	down
PC(14:0/22:5(7Z,10Z,13Z,16Z,19Z))	-2.183062642	3.233649773	-2.655887444	0.017308998	0.040657784	-3.61941435	down
DG(18:1(11Z)/18:0/0:0)	-0.468519393	5.543573782	-3.003669168	0.008447779	0.022852417	-3.624127188	non
CE(20:4(5Z,8Z,11Z,14Z))	-0.669174868	6.648917197	-3.059899383	0.007513029	0.020868804	-3.626690843	down
3-trans,5-cis-Octadienoyl-CoA	0.358773979	6.394843327	3.053710026	0.007610735	0.021071735	-3.62964405	non
PC(24:1(15Z)/16:0)	0.37209846	4.687398204	2.931767704	0.009810109	0.02575655	-3.630494238	non
Docosahexaenoic acid	0.636931169	2.06559518	2.538004609	0.021982622	0.048713734	-3.632663398	up
PC(20:2(11Z,14Z)/20:4(5Z,8Z,11Z,14Z))	0.365643356	5.858562478	3.026603602	0.008053518	0.022039124	-3.633158938	non
Glycerol 3-phosphate	0.294044993	8.194964536	3.072772048	0.007313745	0.020385793	-3.634486795	non
Tigecycline	0.270401382	5.760396084	3.017452756	0.00820862	0.02237511	-3.638077473	non
Docosapentaenoic acid (22n-3)	0.780369402	1.119322419	2.423298379	0.02766733	0.058678862	-3.638165571	up
2-[3-(sulfooxy)phenyl]acetic acid	-2.128908836	1.084916378	-2.391106769	0.029497104	0.061784215	-3.645732839	down
PI(18:3(9Z,12Z,15Z)/18:0)	-1.057848307	4.097793456	-2.820761118	0.012343333	0.030840192	-3.652217049	down
Nateglinide	-0.59553541	4.837006483	-2.92922754	0.009861967	0.025850694	-3.652587397	down
DG(14:0/20:2(11Z,14Z)/0:0)	0.662848992	5.213826919	2.962165182	0.009209813	0.024440255	-3.655853817	up
2-hydroxyoct-6-enoylglycine	1.153727536	3.741658539	2.77564324	0.013545218	0.033354061	-3.657040749	up
MG(20:5(5Z,8Z,11Z,14Z,17Z)/0:0/0:0)	-0.489902032	5.621469699	-2.990221082	0.008687682	0.023345625	-3.662800898	non
PC(14:0/18:4(6Z,9Z,12Z,15Z))	0.577712905	3.999663247	2.831166314	0.01208118	0.030401777	-3.665407164	up
Medrysone	0.763236069	2.89066189	2.636485826	0.018006547	0.041958651	-3.668268474	up
Protocatechuic acid 3-O-sulfate	-0.800354634	2.754655397	-2.60821953	0.019071222	0.043799077	-3.670959676	down
Lutein	0.174597436	8.213232867	3.05282793	0.007624761	0.021087948	-3.675698858	non
PE(P-16:0/22:2(13Z,16Z))	0.413064513	5.614537455	2.986691874	0.008751736	0.023477671	-3.676031239	non
Glutaryl-CoA	1.594541429	4.657701394	2.883054871	0.010852477	0.027900162	-3.676433757	up
DG(16:1(9Z)/20:5(5Z,8Z,11Z,14Z,17Z)/0:0)	0.289900794	5.377214111	2.965678625	0.009142784	0.02430255	-3.677704759	non
PE(P-18:1(9Z)/18:1(11Z))	0.338329885	6.060251772	3.014451614	0.008260122	0.022468566	-3.681502588	non
PC(22:1(13Z)/18:0)	0.426510599	6.171231355	3.015832406	0.008236387	0.022431755	-3.688508192	non
DG(24:1(15Z)/14:0/0:0)	-0.574698127	5.551908859	-2.970770818	0.009046482	0.024106434	-3.689783376	down
Fluconazole	0.973174664	2.881488365	2.618401264	0.018680952	0.043133691	-3.694977697	up
5-Methoxydimethyltryptamine	1.08174833	3.271743299	2.67845754	0.016530159	0.03931729	-3.698451876	up
DG(18:1(9Z)/20:3(8Z,11Z,14Z)/0:0)	0.405559819	6.763464316	3.030921394	0.007981334	0.021889025	-3.699609399	non
Reserpine	0.393041059	5.822392186	2.990188791	0.008688266	0.023345625	-3.70170751	non
Mitomycin	0.820814543	9.131278044	3.041443914	0.007808065	0.021520769	-3.705758869	up
PE(22:2(13Z,16Z)/P-16:0)	0.391979893	4.612392701	2.884658197	0.010816513	0.027852305	-3.711315162	non
1,1-Dimethylethyl heptanoic acid	0.351886065	8.18195634	3.033944271	0.007931176	0.021785291	-3.713299887	non
Monoisobutyl phthalic acid	1.34038234	5.54676018	2.953046715	0.009386019	0.02476459	-3.715070467	up
Brassicasterol	0.380098654	4.535677599	2.873956717	0.011058764	0.028362373	-3.718356313	non
DG(20:4(8Z,11Z,14Z,17Z)/20:3(8Z,11Z,14Z)/0:0)	-1.527693548	1.839729665	-2.439232586	0.026801781	0.057411955	-3.726602306	down
PC(P-16:0/20:3(8Z,11Z,14Z))	0.431391763	4.328183596	2.83892648	0.01188919	0.030083678	-3.743413811	non
PC(18:0/22:6(4Z,7Z,10Z,13Z,16Z,19Z))	-0.575872494	3.421100611	-2.682806142	0.01638402	0.039114563	-3.744744179	down
PE(14:1(9Z)/24:0)	0.674371348	5.030817411	2.902533589	0.010423333	0.027013173	-3.745078242	up
D-Xylulose	0.225910941	6.157800753	2.986675653	0.008752031	0.023477671	-3.747094457	non
DG(18:0/20:4(8Z,11Z,14Z,17Z)/0:0)	-0.699024522	8.616573805	-3.018613406	0.008188787	0.022340013	-3.747641373	down
Deoxycholic acid 3-glucuronide	-0.80531299	6.102522563	-2.975289566	0.008961855	0.023920628	-3.747672364	down
DG(16:0/18:3(9Z,12Z,15Z)/0:0)	-0.272085839	6.247701506	-2.985889889	0.008766356	0.023496468	-3.754142785	non
PC(18:0/22:5(7Z,10Z,13Z,16Z,19Z))	0.469691139	4.487166688	2.849392688	0.011634934	0.029549341	-3.756546925	non
DG(22:6(4Z,7Z,10Z,13Z,16Z,19Z)/18:1(9Z)/0:0)	-1.101577724	5.533351753	-2.925052252	0.009947786	0.025990514	-3.765417772	down
Nandrolone	0.519484825	7.654606344	3.003769224	0.008446019	0.022852417	-3.767194911	up
PC(20:0/22:5(4Z,7Z,10Z,13Z,16Z))	0.3804031	5.123585392	2.898622866	0.010508145	0.027189084	-3.768920887	non
PC(22:2(13Z,16Z)/18:4(6Z,9Z,12Z,15Z))	0.409609375	5.345647252	2.91740125	0.010106939	0.026299335	-3.769167322	non
2-hydroxyoct-4-enoylglycine	0.964649479	2.761424502	2.559420102	0.021052473	0.047206348	-3.771442457	up
PI(18:1(9Z)/18:3(9Z,12Z,15Z))	1.446518355	2.271878498	2.478191248	0.02479214	0.053680082	-3.774403669	up
PC(20:4(5Z,8Z,11Z,14Z)/18:2(9Z,12Z))	0.231296436	6.808669912	2.995013198	0.00860144	0.023189945	-3.775261292	non
DG(20:3(8Z,11Z,14Z)/18:1(9Z)/0:0)	0.773119537	6.974028889	2.99505218	0.008600742	0.023189945	-3.776581574	up
PI(16:0/20:4(5Z,8Z,11Z,14Z))	0.225000848	8.020764433	2.996796266	0.008569565	0.023142871	-3.784857102	non
DG(18:1(11Z)/18:3(6Z,9Z,12Z)/0:0)	-0.395358981	5.147467194	-2.891600888	0.01066212	0.027498849	-3.786126805	non
DG(18:3(6Z,9Z,12Z)/18:1(9Z)/0:0)	0.384129764	6.919609693	2.990463411	0.008683301	0.023345625	-3.788357484	non
DG(16:1(9Z)/20:0/0:0)	-0.351309318	6.145789618	-2.960258175	0.009246395	0.024496867	-3.795036456	non
DG(24:1(15Z)/24:0/0:0)	-1.786970355	3.589964422	-2.628410624	0.018304751	0.042560866	-3.801954089	down
MG(0:0/14:0/0:0)	-2.421429754	2.362669286	-2.436182564	0.026965453	0.05768559	-3.802434355	down
PG(16:0/18:1(11Z))	0.208159777	6.616470014	2.975704297	0.008954126	0.023919883	-3.803809934	non
PC(22:1(13Z)/18:3(6Z,9Z,12Z))	3.508701278	1.813937607	2.347381391	0.032165469	0.066121216	-3.807140044	up
DG(24:0/14:0/0:0)	1.418678622	3.245394794	2.608125665	0.019074856	0.043799077	-3.807974321	up
PC(20:5(5Z,8Z,11Z,14Z,17Z)/P-18:0)	0.484593747	4.615027009	2.834363431	0.01200172	0.030272995	-3.810937987	non
Atorvastatin	0.424454292	4.80324539	2.849131807	0.011641207	0.029549341	-3.815286016	non
DG(18:3(6Z,9Z,12Z)/16:0/0:0)	-0.359679264	3.985475447	-2.747981244	0.014337263	0.035115906	-3.816750373	non
PC(16:0/20:3(8Z,11Z,14Z))	0.171000161	6.356231247	2.959209292	0.009266576	0.024509864	-3.818601338	non
DG(20:1(11Z)/20:4(5Z,8Z,11Z,14Z)/0:0)	0.210627785	8.391131127	2.983736262	0.008805734	0.023580234	-3.820807112	non
LysoPE(0:0/20:2(11Z,14Z))	1.236105021	4.066008381	2.736741993	0.014671694	0.035744164	-3.826292762	up
DG(14:1(9Z)/20:1(11Z)/0:0)	0.191073613	6.424746565	2.954544397	0.009356853	0.02470794	-3.833227056	non
MG(18:3(6Z,9Z,12Z)/0:0/0:0)	0.444276765	6.769976972	2.964313383	0.009168773	0.024351473	-3.834744305	non
15-Keto-prostaglandin E2	0.669826686	5.189058547	2.869550018	0.011160045	0.028599285	-3.837667022	up
GlcCer(d18:1/25:0)	0.300624254	6.990764901	2.967158237	0.009114699	0.024262764	-3.837892489	non
PC(16:1(9Z)/22:0)	0.507602547	4.843016707	2.836109909	0.011958528	0.030220273	-3.847218178	up
2,7-octadienoylglycine	0.391853033	5.962780179	2.926902278	0.009909671	0.025954285	-3.847585935	non
Guanosine	0.284544355	7.863530926	2.960257696	0.009246404	0.024496867	-3.85636858	non
5alpha-Androstan-3alpha,17beta-diol disulfate	-0.497621777	6.899394088	-2.951279419	0.009420549	0.024814915	-3.86083158	non
DG(20:0/20:4(8Z,11Z,14Z,17Z)/0:0)	0.599231321	7.111935312	2.955744502	0.009333546	0.024666681	-3.861455343	up
Lactodifucotetraose	-0.394524137	4.605634226	-2.801000051	0.012856463	0.031952092	-3.86860062	non
PG(18:2(9Z,12Z)/18:1(9Z))	0.260660972	5.866675021	2.909853166	0.01026638	0.026670992	-3.870875686	non
PE(22:1(13Z)/18:3(9Z,12Z,15Z))	0.590418962	5.815883779	2.903578429	0.010400786	0.026976514	-3.872276079	up
PC(P-18:1(11Z)/20:3(8Z,11Z,14Z))	0.985942661	7.548408195	2.947851271	0.009487883	0.024971796	-3.880971857	up
Miglitol	-0.444072004	9.39211241	-2.95178591	0.00941064	0.024809167	-3.889105262	non
Ganglioside GM3 (d18:1/16:0)	-0.932041919	4.384649651	-2.743799769	0.014460817	0.035387922	-3.897978397	down
DG(20:1(11Z)/18:1(11Z)/0:0)	1.15766781	4.100646133	2.708434154	0.015547683	0.037395962	-3.899331505	up
Methyl neopentyl phthalic acid	-1.053447021	3.686255765	-2.629485772	0.018264776	0.042498693	-3.899865401	down
PC(18:3(9Z,12Z,15Z)/P-18:0)	0.317874131	5.901285433	2.894661037	0.01059475	0.027369061	-3.905471715	non
12(S)-HPETE	1.095267082	0.71062528	2.222932022	0.041049709	0.080225572	-3.907280454	up
Guanine	0.482752849	8.933234362	2.940876158	0.009626338	0.025294739	-3.909570407	non
PC(18:0/20:5(5Z,8Z,11Z,14Z,17Z))	-0.281487393	11.03710815	-2.966864913	0.00912026	0.024262764	-3.917286089	non
DG(20:4(8Z,11Z,14Z,17Z)/16:0/0:0)	-0.848019627	3.351677789	-2.572500149	0.020502953	0.046297455	-3.919059849	down
Dicyclomine	1.064064873	0.394686026	2.184999156	0.044181487	0.085597538	-3.919294517	up
Prostaglandin A1	0.348337385	4.995407394	2.809237035	0.012640112	0.0314897	-3.926180329	non
4-hydroxyoct-3-enoylglycine	0.359223304	7.260621946	2.922379586	0.010003102	0.026092576	-3.931146521	non
Theaflavin	-0.533204493	3.993067541	-2.681843465	0.016416264	0.039162425	-3.936144129	down
N4-Acetylcytidine	0.210199729	8.137114706	2.922968178	0.009990894	0.02608192	-3.936721932	non
PE(P-18:0/18:1(11Z))	0.373887404	5.703831778	2.864197661	0.011284273	0.028845834	-3.937400934	non
PI(22:4(10Z,13Z,16Z,19Z)/18:0)	-1.270731112	4.544665448	-2.7307731	0.014852349	0.036102113	-3.941672464	down
PC(18:2(9Z,12Z)/18:4(6Z,9Z,12Z,15Z))	1.314397174	1.150064678	2.246821425	0.039184395	0.077096258	-3.942678821	up
PE(18:1(11Z)/18:0)	1.550493261	2.235112756	2.377604039	0.030298043	0.063132391	-3.944606877	up
DG(18:1(11Z)/22:6(4Z,7Z,10Z,13Z,16Z,19Z)/0:0)	0.227570949	5.427954637	2.832546498	0.012046815	0.030339076	-3.953690265	non
PA(18:1(9Z)/18:1(11Z))	0.373251551	7.151126137	2.907702528	0.010312255	0.026768514	-3.960074572	non
DG(22:2(13Z,16Z)/18:4(6Z,9Z,12Z,15Z)/0:0)	-0.767239563	6.212334069	-2.874022735	0.011057253	0.028362373	-3.965625279	down
DG(22:6(4Z,7Z,10Z,13Z,16Z,19Z)/14:0/0:0)	0.620018865	4.950257651	2.784796653	0.013292568	0.032807407	-3.966261533	up
Pipobroman	-0.478499623	4.532632147	-2.741712243	0.014522883	0.035489328	-3.967614495	non
PE(14:1(9Z)/22:0)	0.420779193	3.747886819	2.636077505	0.018021513	0.041963073	-3.96905022	non
GlcCer(d18:1/9Z-18:1)	0.456279347	5.624451137	2.841006498	0.011838234	0.029978368	-3.970056467	non
DG(20:4(8Z,11Z,14Z,17Z)/18:2(9Z,12Z)/0:0)	0.411948852	6.682337563	2.894009873	0.010609051	0.027383973	-3.971953831	non
PE(P-18:1(11Z)/20:1(11Z))	0.461698225	7.040137966	2.897857827	0.010524815	0.02721029	-3.977802916	non
PI(16:2(9Z,12Z)/18:0)	0.713073291	5.655317429	2.83549347	0.011973756	0.030226203	-3.982265783	up
Sialyllacto-N-tetraose a	1.551849785	3.652658457	2.572807893	0.02049019	0.046297455	-3.989724639	up
MG(20:3(5Z,8Z,11Z)/0:0/0:0)	-1.242914463	6.15240975	-2.849173487	0.011640205	0.029549341	-3.990240432	down
DG(16:1(9Z)/20:4(5Z,8Z,11Z,14Z)/0:0)	-0.86699999	5.378590348	-2.798671705	0.012918266	0.03208086	-4.00278941	down
PE(18:3(6Z,9Z,12Z)/22:2(13Z,16Z))	0.563170138	3.811814433	2.627489858	0.018339053	0.042566934	-4.003548139	up
DG(20:3(8Z,11Z,14Z)/20:2(11Z,14Z)/0:0)	0.348318046	5.615348689	2.822862805	0.012289942	0.030806403	-4.005334996	non
SM(d18:1/26:0)	-0.577542057	4.954019867	-2.762639096	0.013912152	0.034152845	-4.006718805	down
alpha-Linolenic acid	-0.730621167	5.273362133	-2.788783343	0.01318396	0.032589449	-4.008697404	down
PE(18:0/18:1(11Z))	1.110529369	5.323913282	2.791788175	0.013102667	0.032413455	-4.011092412	up
1,9-Dimethyluric acid	-0.527850086	5.695305542	-2.821481574	0.012325005	0.030840192	-4.011151014	down
8-HETE	0.289304897	6.551919873	2.865699089	0.01124929	0.028782048	-4.020878068	non
PI(18:2(9Z,12Z)/16:0)	-0.437269495	6.374549197	-2.857766158	0.011435326	0.029165077	-4.02092291	non
Norepinephrine	0.217386332	11.52266212	2.921874809	0.010013583	0.026098713	-4.031246672	non
DG(18:1(11Z)/20:1(11Z)/0:0)	0.235119355	6.734566386	2.865904617	0.011244509	0.028782048	-4.03167346	non
1,4-Bis-(1,1-dimethylethyl)-benzene	0.596124783	4.184995683	2.668564539	0.016867306	0.03985351	-4.037617159	up
DG(20:5(5Z,8Z,11Z,14Z,17Z)/20:0/0:0)	-0.583492907	6.043074021	-2.828515869	0.012147439	0.030520678	-4.041627844	down
Quetiapine	-0.377301743	2.749527883	-2.412116782	0.028290404	0.059802823	-4.045626692	non
PI(20:4(5Z,8Z,11Z,14Z)/16:0)	0.42444571	4.932302338	2.743478071	0.014470365	0.035387922	-4.045687245	non
PC(22:0/18:3(6Z,9Z,12Z))	0.369069425	5.574012589	2.795492662	0.013003114	0.032241699	-4.052536754	non
Treprostinil	0.191834252	5.130188225	2.752341915	0.0142095	0.034829546	-4.060772727	non
Diaminopimelic acid	0.247258864	13.334229	2.944884545	0.009546533	0.025105583	-4.070698093	non
PG(16:1(9Z)/18:1(9Z))	0.232922471	6.184498386	2.820442615	0.012351444	0.030840192	-4.083165525	non
DG(18:0/22:2(13Z,16Z)/0:0)	0.17356681	6.781869605	2.841248352	0.011832323	0.029978368	-4.083331635	non
N1-Methyl-4-pyridone-3-carboxamide	0.164158594	5.852498247	2.793702045	0.013051143	0.032335818	-4.100781623	non
PI(18:0/20:3(5Z,8Z,11Z))	-3.633989382	2.84658496	-2.271734005	0.037323369	0.074115856	-4.103544562	down
PI(16:0/18:2(9Z,12Z))	-0.563398087	5.964608807	-2.792020508	0.013096402	0.032413455	-4.104807906	down
DG(16:0/22:1(13Z)/0:0)	-0.574440817	3.139731383	-2.442488207	0.026628113	0.057116146	-4.106672795	down
LysoPE(18:1(9Z)/0:0)	0.423967105	6.618192678	2.823817085	0.012265773	0.030769841	-4.108361269	non
PC(18:1(11Z)/18:3(9Z,12Z,15Z))	-1.017729491	1.115679236	-2.142897434	0.047915121	0.091146596	-4.109175684	down
MG(20:4(8Z,11Z,14Z,17Z)/0:0/0:0)	-0.508819974	6.105714635	-2.797971839	0.012936899	0.032102305	-4.112301341	down
PE(18:1(9Z)/18:1(11Z))	-0.707973294	5.128428674	-2.723743446	0.01506786	0.036542975	-4.112646062	down
PC(22:4(7Z,10Z,13Z,16Z)/16:1(9Z))	0.269951485	5.716035565	2.77653533	0.013520392	0.03331848	-4.114329048	non
PI(18:1(9Z)/20:4(8Z,11Z,14Z,17Z))	1.281993882	2.225926606	2.285876775	0.036303861	0.072539948	-4.115160803	up
PC(18:1(11Z)/22:1(13Z))	-0.747443887	2.538801455	-2.331050347	0.033218981	0.067681566	-4.123211927	down
PE(20:4(5Z,8Z,11Z,14Z)/18:0)	0.991946659	5.049441703	2.71067845	0.015476433	0.037254195	-4.125880075	up
PC(18:2(9Z,12Z)/16:1(9Z))	-0.335924834	4.195366469	-2.618282889	0.018685445	0.043133691	-4.131737592	non
3-Nitrotyrosine	0.706824521	3.485329023	2.495436589	0.023948924	0.05227736	-4.135465802	up
Vancomycin	1.324467728	4.022604347	2.561662534	0.020957276	0.047076543	-4.143794628	up
DG(20:1(11Z)/20:3(5Z,8Z,11Z)/0:0)	0.391764183	4.426470352	2.645590438	0.017675914	0.041368338	-4.145563776	non
TG(20:0/20:1(11Z)/20:4(5Z,8Z,11Z,14Z))	-0.754806578	5.075899057	-2.701145958	0.015781248	0.037900962	-4.146700907	down
MG(0:0/20:1(11Z)/0:0)	1.286626435	5.558440634	2.737374237	0.014652683	0.035724954	-4.147972719	up
PC(20:4(5Z,8Z,11Z,14Z)/22:1(13Z))	0.384294302	5.162878047	2.710656128	0.01547714	0.037254195	-4.148175213	non
DG(16:1(9Z)/22:5(4Z,7Z,10Z,13Z,16Z)/0:0)	-0.471996801	5.860232121	-2.763720898	0.013881265	0.034103092	-4.149830887	non
DG(18:0/20:4(5Z,8Z,11Z,14Z)/0:0)	-0.703197614	4.180594267	-2.593452631	0.019651132	0.044878937	-4.150179048	down
gamma-Glutamyltyrosine	-0.612311265	4.46613252	-2.636864685	0.017992671	0.041956766	-4.150446004	down
Erlotinib	1.962147709	0.581751556	2.050495675	0.057146886	0.105519639	-4.150989474	non
DG(18:1(9Z)/22:5(4Z,7Z,10Z,13Z,16Z)/0:0)	0.934794902	7.110421598	2.809203293	0.012640991	0.0314897	-4.151405829	up
Tetradecanoylcarnitine	0.512596468	-0.255264497	1.977477098	0.0655586	0.116949258	-4.157135027	non
PC(22:5(7Z,10Z,13Z,16Z,19Z)/P-16:0)	0.3116144	5.033240114	2.694207621	0.016006736	0.038328553	-4.158862905	non
PC(22:5(7Z,10Z,13Z,16Z,19Z)/18:0)	1.218081918	3.985199793	2.551949994	0.021372581	0.047691007	-4.162280251	up
Clidinium	0.425144361	8.141226421	2.810014322	0.012619879	0.031485961	-4.163159925	non
PC(22:2(13Z,16Z)/20:3(5Z,8Z,11Z))	0.345571844	8.213155359	2.808631964	0.012655884	0.03150236	-4.167623964	non
DG(20:4(5Z,8Z,11Z,14Z)/18:0/0:0)	0.88508608	4.274291317	2.601451505	0.019334947	0.044251258	-4.1772095	up
3-hydroxyoct-5-enoylglycine	0.219092171	4.928883519	2.674203884	0.01667432	0.039455594	-4.181129358	non
PC(20:3(5Z,8Z,11Z)/P-18:1(11Z))	0.553608784	5.435133802	2.715203739	0.015333723	0.036966757	-4.185756827	up
Pefloxacin	-1.665483964	6.634594382	-2.76520189	0.013839087	0.034025504	-4.186606101	down
PC(18:0/20:3(5Z,8Z,11Z))	-0.293345083	4.820519362	-2.656804736	0.017276668	0.040611554	-4.193915612	non
DG(18:1(9Z)/20:0/0:0)	-0.590360193	7.135348434	-2.786474977	0.013246741	0.03271945	-4.196438034	down
TG(15:0/18:0/18:3(9Z,12Z,15Z))	0.50818343	4.659216415	2.637955046	0.017952794	0.04192467	-4.204335494	up
6-(5-carboxy-2,3-dihydroxyphenoxy)-3,4,5-trihydroxyoxane-2-carboxylic acid	0.41420417	4.399145683	2.611136357	0.018958628	0.043701476	-4.205836988	non
Diatrizoate	0.656367289	4.971284298	2.663210905	0.017052499	0.04023187	-4.208127399	up
3-Hydroxyoctanoic acid	1.605369417	2.275751298	2.230476366	0.040451913	0.07929513	-4.213357963	up
Butyrylcarnitine	-1.907560705	5.507628252	-2.67729746	0.016569356	0.039323136	-4.218438486	down
4-hydroxyoct-7-enoylglycine	-0.36747159	4.485363456	-2.60958069	0.0190186	0.043776863	-4.218611085	non
Isomaltose	0.357715326	5.394681035	2.69260837	0.016059148	0.038424683	-4.223751279	non
PC(18:1(11Z)/16:0)	-0.38793728	11.67423331	-2.825262786	0.012229246	0.030702196	-4.231682866	non
TG(18:0/18:0/18:1(9Z))	-0.714279019	3.449229891	-2.4253484	0.027554511	0.058516888	-4.234041452	down
DG(18:0/14:0/0:0)	0.432184902	3.720103304	2.483427744	0.024533168	0.053235093	-4.249774387	non
DG(22:2(13Z,16Z)/16:0/0:0)	-0.793862845	5.188424896	-2.653131304	0.017406485	0.040827044	-4.259617978	down
3-Fucosyllactose	-0.593057823	1.329806152	-2.081593492	0.053872495	0.100339085	-4.263550899	non
PG(18:1(9Z)/16:0)	-2.075651449	3.399880872	-2.341446567	0.032544645	0.066645954	-4.265455021	down
PC(18:3(6Z,9Z,12Z)/20:2(11Z,14Z))	-0.61282185	6.046694532	-2.715172627	0.0153347	0.036966757	-4.265628513	down
PC(22:5(4Z,7Z,10Z,13Z,16Z)/16:1(9Z))	0.517465163	6.556593024	2.738228326	0.014627039	0.03568953	-4.273444031	up
Lacto-N-difucopentaose II	0.263034613	6.469798341	2.733383178	0.014773089	0.035936659	-4.277847331	non
Hexadecyl Benzoic acid	-0.565045426	5.098483403	-2.636866726	0.017992596	0.041956766	-4.278840713	down
Cephalexin	-0.845317978	6.75611784	-2.733616603	0.014766021	0.035936659	-4.282621532	down
Tetrahexosylceramide (d18:1/12:0)	0.618410917	5.564930156	2.676387726	0.016600157	0.039367137	-4.283220995	up
DG(16:1(9Z)/22:2(13Z,16Z)/0:0)	0.520630939	4.231731718	2.548174263	0.021536139	0.047955993	-4.284248618	up
Aspartame	-0.800921653	4.486529266	-2.561474055	0.020965262	0.047076543	-4.288573551	down
12,13-EpOME	-0.936266176	4.526913333	-2.561024115	0.020984337	0.047086447	-4.290309265	down
Cinalukast	0.176905813	6.446260639	2.725007334	0.015028892	0.036476017	-4.292586933	non
Dehydroascorbic acid	0.423213311	3.247213229	2.365138107	0.031055604	0.064495727	-4.298940236	non
PI(18:1(11Z)/16:0)	-1.798814775	2.077414285	-2.137673237	0.048398153	0.091847795	-4.299990941	down
PC(18:3(6Z,9Z,12Z)/P-18:1(9Z))	0.591575189	5.774928084	2.683160945	0.016372151	0.039114563	-4.303209897	up
DG(20:3(5Z,8Z,11Z)/20:1(11Z)/0:0)	1.036666886	4.507253485	2.556579485	0.021173656	0.047378823	-4.313000161	up
5-hydroxyoct-3-enoylglycine	-0.377641995	6.694785488	-2.72003964	0.015182619	0.036682761	-4.315015033	non
DG(20:1(11Z)/18:3(9Z,12Z,15Z)/0:0)	0.268875453	6.710978078	2.722255233	0.01511387	0.036565987	-4.315367553	non
PC(20:4(8Z,11Z,14Z,17Z)/20:0)	0.673726865	6.82849382	2.722767178	0.015098027	0.036565987	-4.317118866	up
Chlorpromazine	-0.809119395	8.063529823	-2.730169402	0.014870739	0.036119473	-4.322244485	down
2,8-Dihydroxyquinoline-beta-D-glucuronide	0.351728733	6.999111047	2.721963682	0.0151229	0.036565987	-4.327257734	non
6-(3-carboxy-2-hydroxyphenoxy)-3,4,5-trihydroxyoxane-2-carboxylic acid	-0.61676943	3.825353366	-2.444595526	0.026516268	0.056952331	-4.330203732	down
DG(18:3(9Z,12Z,15Z)/20:2(11Z,14Z)/0:0)	0.342183991	7.823930188	2.722579934	0.01510382	0.036565987	-4.330285256	non
3-[4-methoxy-3-(sulfooxy)phenyl]propanoic acid	0.494134025	3.86844507	2.465961976	0.025407072	0.054863557	-4.332134551	non
11,12-DiHETrE	0.310930529	7.445977118	2.716874109	0.015281367	0.036893586	-4.340266704	non
Fluticasone propionate	1.437051374	-0.16780552	1.868852885	0.080146274	0.137326406	-4.343701987	non
DG(18:4(6Z,9Z,12Z,15Z)/22:0/0:0)	-0.204385024	5.131661853	-2.607281707	0.019107559	0.043799077	-4.343765707	non
PC(22:0/18:2(9Z,12Z))	0.922930904	4.273746809	2.510911402	0.023215521	0.05074949	-4.347681971	up
5-Hydroxyomeprazole	0.219761262	6.585394371	2.699828752	0.015823819	0.0379748	-4.351867089	non
PC(18:1(9Z)/20:4(5Z,8Z,11Z,14Z))	-0.637968027	5.780800895	-2.651691011	0.017457639	0.040917139	-4.353621324	down
DG(22:4(7Z,10Z,13Z,16Z)/18:3(9Z,12Z,15Z)/0:0)	-1.191995861	3.50909249	-2.347056064	0.032186146	0.066121216	-4.361409625	down
Taurochenodeoxycholate-3-sulfate	0.191649218	5.469024499	2.625190707	0.018424973	0.042655073	-4.36843956	non
DG(14:1(9Z)/24:0/0:0)	0.192038915	6.723324833	2.694198496	0.016007035	0.038328553	-4.371207863	non
Cefmenoxime	0.530008926	11.18416927	2.741184593	0.014538612	0.035500747	-4.375581264	up
Megestrol	0.222394871	9.583834884	2.70688371	0.01559709	0.037486718	-4.376868979	non
Dodecanoylcarnitine	-0.80651695	5.057675349	-2.578882919	0.020239796	0.045864492	-4.379512681	down
Hesperetin	1.377232721	5.157421471	2.585637495	0.019964824	0.045433771	-4.380824902	up
PC(20:3(5Z,8Z,11Z)/20:0)	0.352678607	7.553238387	2.696132049	0.015943886	0.038234366	-4.380986827	non
Menadione	0.294149484	6.360740045	2.675045427	0.016645703	0.039446018	-4.383989665	non
alpha-Tocopherol	0.895423249	0.815800627	1.942375277	0.069987842	0.123140253	-4.384603239	non
Phosphocreatine	-0.290897418	5.435825126	-2.607827239	0.019086414	0.043799077	-4.393918964	non
2-Oxoarginine	0.164205451	6.762503929	2.677596882	0.016559231	0.039323136	-4.405683728	non
Fenoprofen	1.179281341	-0.531165218	1.801889039	0.090519607	0.151384614	-4.408412035	non
DG(16:1(9Z)/22:5(7Z,10Z,13Z,16Z,19Z)/0:0)	-0.419457041	6.208589608	-2.653637308	0.017388548	0.040814786	-4.409277703	non
PI(20:1(11Z)/18:1(11Z))	0.244684169	6.512961902	2.665632033	0.016968507	0.040063144	-4.41377443	non
PC(20:4(8Z,11Z,14Z,17Z)/18:1(9Z))	0.505284919	7.209486941	2.67874769	0.01652037	0.03931729	-4.414319541	up
PE(P-16:0/18:1(9Z))	-0.280801019	7.828070579	-2.677771006	0.016553345	0.039323136	-4.419407059	non
p-Chlorobenzene sulfonyl urea	0.211271217	13.48865924	2.773415761	0.013607399	0.033481501	-4.42198791	non
Bexarotene	0.341611534	7.307003791	2.674505603	0.016664054	0.039455594	-4.423283468	non
Caffeic acid	1.730203735	2.225671857	2.091982406	0.052817413	0.0986601	-4.432951275	non
DG(18:0/16:1(9Z)/0:0)	0.365210585	5.395422327	2.583416135	0.020054857	0.045541829	-4.435748093	non
p-Hydroxyphenylacetic acid	0.825446071	2.319634609	2.120967513	0.049972985	0.094223872	-4.439059933	up
Flutamide	0.666458264	3.24730188	2.282573502	0.036539631	0.072875004	-4.444191189	up
Cer(d18:0/18:1(11Z))	0.457742855	5.231583924	2.562377927	0.020926993	0.047076543	-4.447348831	non
PC(16:0/14:0)	0.445550104	3.865147365	2.401835424	0.028874974	0.060798389	-4.452102078	non
Phytoene	0.368539052	7.274397654	2.659631706	0.017177398	0.040482211	-4.452248361	non
PC(P-16:0/18:1(9Z))	1.455886742	1.557745956	1.98954777	0.064094966	0.114912862	-4.452493051	non
6-Phosphogluconic acid	0.20364676	7.567662144	2.659448292	0.017183822	0.040482211	-4.452667493	non
PC(20:3(5Z,8Z,11Z)/14:1(9Z))	0.269252382	6.054835402	2.623009482	0.018506842	0.042782915	-4.459346667	non
Dihomo-gamma-linolenic acid	0.30316067	6.585680334	2.643263087	0.017759873	0.041534561	-4.462231288	non
PC(16:1(9Z)/P-18:0)	1.182308248	2.794785287	2.179410088	0.044661178	0.086285826	-4.465256041	up
PC(18:3(9Z,12Z,15Z)/20:3(5Z,8Z,11Z))	0.18480926	6.208217079	2.626562982	0.018373644	0.042566934	-4.466256525	non
DG(14:0/20:3(8Z,11Z,14Z)/0:0)	0.404593069	7.093466261	2.650153195	0.017512416	0.041015586	-4.46930147	non
Catechin	0.247583115	6.643284284	2.64084242	0.017847604	0.041709358	-4.470692992	non
PE(22:2(13Z,16Z)/15:0)	1.130364192	3.741080491	2.346743311	0.032206036	0.066121216	-4.473381717	up
Methylergonovine	0.597808346	9.585659354	2.657968591	0.017235733	0.040554934	-4.473638228	up
PC(18:1(11Z)/20:3(8Z,11Z,14Z))	0.480079714	5.602129304	2.577323523	0.020303789	0.045977058	-4.482983491	non
PC(18:2(9Z,12Z)/20:2(11Z,14Z))	-0.558845341	6.608581472	-2.627058225	0.018355154	0.042566934	-4.489397724	down
DG(14:1(9Z)/22:5(7Z,10Z,13Z,16Z,19Z)/0:0)	-0.311337892	11.02800829	-2.678860737	0.016516557	0.03931729	-4.490475666	non
DG(20:4(5Z,8Z,11Z,14Z)/14:0/0:0)	-2.00723463	2.756688488	-2.119024453	0.050159179	0.094519439	-4.490856173	non
PC(18:4(6Z,9Z,12Z,15Z)/P-18:1(11Z))	0.316633745	5.184307104	2.534482931	0.022139281	0.048959526	-4.492699952	non
PG(16:0/22:6(4Z,7Z,10Z,13Z,16Z,19Z))	0.220572879	6.673488979	2.626744621	0.01836686	0.042566934	-4.499904536	non
Ganglioside GD2 (d18:1/24:0)	0.302051297	5.049697714	2.517785051	0.022896647	0.05025368	-4.501959512	non
PC(P-18:1(9Z)/16:1(9Z))	0.476943294	5.863900596	2.587225156	0.019900712	0.045384366	-4.504084807	non
PC(20:2(11Z,14Z)/P-18:1(9Z))	0.672136214	6.268683876	2.607216386	0.019110092	0.043799077	-4.5068198	up
PC(P-18:0/22:1(13Z))	0.428747168	5.491273066	2.554842927	0.021248067	0.047479153	-4.507327133	non
5-hydroxyoct-6-enoylglycine	-0.821863329	3.55496849	-2.291284591	0.035920942	0.071909067	-4.508501416	down
DG(22:5(7Z,10Z,13Z,16Z,19Z)/18:1(11Z)/0:0)	0.194972943	5.872594535	2.586432135	0.019932711	0.045425078	-4.509060372	non
PC(20:2(11Z,14Z)/20:1(11Z))	-0.477539093	5.07753791	-2.514951954	0.023027569	0.050506505	-4.51016612	non
4,5-octadienoylglycine	-0.217792317	5.427654204	-2.546769518	0.021597294	0.048058843	-4.510570836	non
DG(18:3(9Z,12Z,15Z)/20:0/0:0)	-1.194357799	0.825269781	-1.850792955	0.082834529	0.140731044	-4.513740986	non
PC(16:1(9Z)/22:2(13Z,16Z))	-0.420694674	3.747781986	-2.338070828	0.032762188	0.066996583	-4.51395738	non
Lercanidipine	0.250336766	7.614577674	2.627782523	0.018328143	0.042566934	-4.514338581	non
1-hydroxyoct-2-enoylglycine	0.269178432	5.878134226	2.583990534	0.020031539	0.045521071	-4.514385009	non
Chlorambucil	-0.712931638	5.190032544	-2.51937396	0.022823531	0.050196136	-4.518530904	down
PC(P-16:0/22:0)	0.379846888	4.377748307	2.443353465	0.026582136	0.05705564	-4.520759612	non
PC(18:1(9Z)/20:0)	1.646301635	-0.367008159	1.736043307	0.101855799	0.165851406	-4.528674135	non
Triflupromazine	0.199495863	6.273999155	2.5958267	0.019556776	0.044727071	-4.531071105	non
PC(22:5(4Z,7Z,10Z,13Z,16Z)/18:1(9Z))	-0.377285686	5.232933012	-2.517998657	0.022886805	0.05025368	-4.531447611	non
DG(16:0/22:0/0:0)	-0.776798582	2.963886329	-2.170428487	0.045442128	0.087261249	-4.533838955	down
PC(20:5(5Z,8Z,11Z,14Z,17Z)/P-16:0)	0.281582613	6.591866432	2.603185694	0.019267042	0.044127297	-4.540400733	non
DG(20:3(8Z,11Z,14Z)/20:4(8Z,11Z,14Z,17Z)/0:0)	0.407216137	7.425756046	2.612997026	0.018887137	0.043567957	-4.542958213	non
Cetirizine	0.144145697	6.871259054	2.609131255	0.01903596	0.043785434	-4.543852629	non
Pyridoxine 5'-phosphate	0.455694731	5.583863697	2.542548184	0.021782064	0.048336012	-4.546769114	non
TG(16:1(9Z)/20:1(11Z)/20:4(5Z,8Z,11Z,14Z))	-0.444339337	7.919510072	-2.610475997	0.018984063	0.043728714	-4.552609643	non
PC(18:3(6Z,9Z,12Z)/P-16:0)	-0.298508548	5.116628014	-2.49129384	0.024148965	0.052606735	-4.562832865	non
PC(14:1(9Z)/20:2(11Z,14Z))	-0.588258352	6.792906818	-2.59064619	0.019763234	0.045102875	-4.568105257	down
PC(14:0/22:6(4Z,7Z,10Z,13Z,16Z,19Z))	0.369700654	3.54291549	2.275975164	0.037014869	0.07368552	-4.568345894	non
4a-Carbinolamine tetrahydrobiopterin	0.177046055	6.564835128	2.586040438	0.019948534	0.045428896	-4.571782504	non
Aminoglutethimide	0.810938644	4.040155149	2.357735807	0.031513833	0.065116421	-4.573794056	up
PC(20:3(5Z,8Z,11Z)/18:0)	0.592974253	7.188895857	2.594111456	0.019624904	0.044850937	-4.57811253	up
PE(14:0/22:2(13Z,16Z))	0.480992321	6.588112339	2.582709091	0.020083595	0.045573902	-4.578854129	non
p-Cresol sulfate	0.562671877	4.846365033	2.456751428	0.025879723	0.055734265	-4.582870266	up
PC(18:0/18:1(9Z))	1.244690788	0.811316925	1.808308808	0.089476117	0.150187043	-4.583563857	non
DG(18:2(9Z,12Z)/14:0/0:0)	0.261944962	4.336094388	2.404407051	0.0287277	0.060567724	-4.585296358	non
PE(18:2(9Z,12Z)/18:0)	-0.622671018	4.622908263	-2.426034123	0.027516871	0.058475626	-4.586524679	down
PI(18:2(9Z,12Z)/20:2(11Z,14Z))	1.312106821	2.286602194	2.016818426	0.060896527	0.110912507	-4.591673028	non
13-cis-Retinoic acid	-0.908564719	4.833508091	-2.438377603	0.026847567	0.057471692	-4.59859598	down
Dextromethorphan	-2.745392776	-0.351670703	-1.720377299	0.104728923	0.16915723	-4.599015713	non
APGPR Enterostatin	1.531815503	2.934363159	2.116712535	0.050381549	0.094716132	-4.601978674	non
PI(20:4(8Z,11Z,14Z,17Z)/18:1(11Z))	0.32778337	4.32859113	2.393223039	0.029373396	0.061565257	-4.603774711	non
O-Desmethylverapamil (D-702)	0.45612084	3.669270998	2.280727816	0.036671988	0.073093578	-4.604452405	non
DG(20:2(11Z,14Z)/18:1(9Z)/0:0)	0.163002159	6.099445964	2.549230588	0.021490261	0.047893309	-4.60595885	non
Fexofenadine	0.170644082	6.259620884	2.555776884	0.021208017	0.047422661	-4.606988972	non
PC(P-18:0/18:0)	1.583519093	4.240071338	2.334928468	0.032965915	0.067251304	-4.611983024	up
PC(16:1(9Z)/P-18:1(11Z))	-0.382996175	9.093754446	-2.58502774	0.019989499	0.045457707	-4.612505365	non
DG(18:3(9Z,12Z,15Z)/18:1(11Z)/0:0)	-0.425178863	6.655443457	-2.565572474	0.020792271	0.046851918	-4.612627768	non
6-(2-carboxy-5-hydroxyphenoxy)-3,4,5-trihydroxyoxane-2-carboxylic acid	-0.306628589	5.980684285	-2.535230532	0.022105936	0.048919477	-4.61430296	non
Toremifene	0.256159258	6.399908002	2.55762209	0.021129101	0.047312094	-4.614425157	non
Docosapentaenoic acid (22n-6)	-0.312496618	3.886381365	-2.310464143	0.03459307	0.070080977	-4.616390422	non
PC(P-18:1(11Z)/22:2(13Z,16Z))	0.397947083	5.798256967	2.524157867	0.022604732	0.049855344	-4.616861337	non
Remikiren	-0.281941933	9.314751046	-2.582370613	0.020097367	0.045573902	-4.617729491	non
PC(20:4(8Z,11Z,14Z,17Z)/16:0)	0.342163074	7.415241989	2.574213338	0.020432	0.04620222	-4.617828519	non
Montelukast	1.087818661	-0.566077554	1.64745767	0.119046943	0.187842621	-4.617844743	non
Zolmitriptan	0.13636962	7.676910822	2.571726474	0.020535072	0.046337397	-4.622833954	non
Simvastatin	-1.137591505	3.738892438	-2.243473265	0.039440991	0.077458728	-4.623343908	down
PE(20:3(8Z,11Z,14Z)/P-18:0)	1.699849593	2.54458247	2.029083465	0.059505794	0.109122275	-4.628467123	non
DG(20:4(8Z,11Z,14Z,17Z)/20:0/0:0)	0.139124239	6.848309654	2.561827462	0.020950291	0.047076543	-4.634128458	non
PI(20:2(11Z,14Z)/16:0)	0.27756525	3.807088283	2.291535206	0.035903288	0.071909067	-4.637613487	non
TG(20:0/20:0/20:1(11Z))	0.252426249	5.863777135	2.518463403	0.022865405	0.05025368	-4.638092502	non
Chloramphenicol	1.300944346	-0.401469435	1.646859185	0.119171107	0.187946182	-4.638338036	non
Pyridoxamine 5'-phosphate	0.381518764	9.120667488	2.568203923	0.020681919	0.046635984	-4.643975078	non
PG(16:0/20:3(5Z,8Z,11Z))	0.227210982	8.273579877	2.563759872	0.020868611	0.04699096	-4.648430125	non
PE(20:0/20:4(5Z,8Z,11Z,14Z))	-0.203886955	5.80587228	-2.504720342	0.023506338	0.051346158	-4.651704353	non
PC(18:1(11Z)/P-18:0)	-0.574628176	5.360296682	-2.464503774	0.025481353	0.054986979	-4.652312458	down
5'-O-Desmethyl omeprazole	0.297103515	14.16151652	2.673718536	0.016690845	0.039465614	-4.655130827	non
PG(18:0/18:1(9Z))	0.331094345	6.5653563	2.539853818	0.021900785	0.048565898	-4.66030351	non
11Z-Eicosenoic acid	0.92279167	5.027665741	2.429503691	0.027327164	0.058226624	-4.66219803	up
1,3-Dimethyluric acid	0.210090566	9.423993395	2.558261661	0.021101813	0.047283965	-4.663284577	non
DG(20:2(11Z,14Z)/18:0/0:0)	-0.334420598	3.939711875	-2.293654199	0.035754344	0.071709681	-4.663889627	non
PA(18:1(9Z)/18:1(9Z))	-2.465071684	7.531279001	-2.535827345	0.022079351	0.048894342	-4.672947777	down
Arabinosylhypoxanthine	0.308119271	8.558989948	2.553472358	0.021306971	0.047577666	-4.673843517	non
PC(20:1(11Z)/18:2(9Z,12Z))	0.266697721	7.801255726	2.543726049	0.021730358	0.048288013	-4.677288267	non
Maltitol	0.180938946	8.164306072	2.542918004	0.021765817	0.04833336	-4.685352488	non
MG(0:0/20:4(5Z,8Z,11Z,14Z)/0:0)	0.702233061	8.377310296	2.544976346	0.021675599	0.048199687	-4.685481531	up
Cobalamin	0.370005646	5.337982578	2.446802254	0.026399622	0.056739751	-4.685548426	non
Methylphenidate	-0.406731334	4.245806065	-2.327521539	0.033450833	0.068110732	-4.688860726	non
DG(20:0/18:3(9Z,12Z,15Z)/0:0)	0.607388591	4.644495674	2.379938507	0.030158122	0.063004378	-4.689600655	up
PI(18:0/18:3(9Z,12Z,15Z))	-0.556016615	6.628815066	-2.519839434	0.022802154	0.050183493	-4.696823199	down
PC(20:0/18:1(9Z))	0.270360932	5.952449568	2.493229439	0.024055304	0.052438277	-4.697280374	non
MG(22:1(13Z)/0:0/0:0)	0.44222718	5.263699512	2.433007815	0.027136822	0.057859452	-4.69827207	non
Oleanolic acid	-0.678096617	5.034889848	-2.409273185	0.028450957	0.060023668	-4.699031718	down
2,2,4,6,6-Pentamethyl-3-heptene	0.748268176	4.116120362	2.303055231	0.035100483	0.070707434	-4.700121505	up
3-hydroxyoct-2-enoylglycine	-3.299067663	3.54745224	-2.038058162	0.058506506	0.107535428	-4.701016607	non
PG(18:0/22:5(7Z,10Z,13Z,16Z,19Z))	0.257458182	5.871885095	2.485587013	0.024427129	0.053068947	-4.701658139	non
DG(20:4(5Z,8Z,11Z,14Z)/16:0/0:0)	-0.368840013	7.910001857	-2.531176274	0.022287342	0.049219158	-4.704509046	non
o-Tyrosine	-0.600281981	3.370146222	-2.151936538	0.047089829	0.089682942	-4.706370178	down
Cis-8,11,14,17-Eicosatetraenoic acid	0.212285423	7.813488797	2.524119645	0.022606472	0.049855344	-4.714827203	non
Droperidol	0.24337117	5.397593416	2.435789112	0.026986636	0.057692468	-4.717005372	non
Maltotriose	0.220791214	7.43184534	2.521929601	0.022706395	0.050007021	-4.718000225	non
PC(20:4(8Z,11Z,14Z,17Z)/16:1(9Z))	0.657735005	4.456822637	2.342932814	0.032449297	0.066493104	-4.71852164	up
Levonorgestrel	0.142070275	6.649661927	2.511459177	0.023189955	0.05074949	-4.720083078	non
PI(18:1(9Z)/20:1(11Z))	-0.730779068	4.708719258	-2.359438136	0.031407894	0.064941872	-4.72558071	down
PC(18:1(9Z)/24:0)	-0.426156709	5.393948043	-2.427813493	0.027419424	0.058345773	-4.728327014	non
Cortisone	2.305581756	3.931278281	2.17048973	0.04543676	0.087261249	-4.731004992	up
Tetradecanol	0.66708786	4.172957243	2.296570288	0.035550317	0.071434335	-4.732249416	up
MG(0:0/24:0/0:0)	0.516594968	7.058986757	2.510871636	0.023217378	0.05074949	-4.736285754	up
DG(18:3(6Z,9Z,12Z)/16:1(9Z)/0:0)	0.757006561	5.070254888	2.394460957	0.029301259	0.06149121	-4.736497087	up
DG(22:1(13Z)/18:3(6Z,9Z,12Z)/0:0)	1.103215167	5.572260631	2.43448439	0.027056991	0.057804389	-4.738014141	up
PC(18:1(11Z)/20:4(5Z,8Z,11Z,14Z))	0.176735657	6.258885776	2.485584527	0.024427251	0.053068947	-4.740789129	non
Ursolic acid	-0.538750827	3.76921238	-2.210803576	0.042027941	0.081987679	-4.742450118	down
Naproxen	3.146508779	2.596836371	1.904858801	0.075017516	0.130004372	-4.74456658	non
Naringin	0.202689563	11.14926535	2.549165777	0.021493073	0.047893309	-4.747741238	non
Propylthiouracil	1.525649819	3.085959519	2.057487259	0.056395292	0.10437192	-4.748076888	non
2-hydroxyoct-5-enoylglycine	-0.65167996	5.015114847	-2.378122889	0.030266892	0.063108435	-4.753917275	down
DG(14:0/20:4(8Z,11Z,14Z,17Z)/0:0)	0.94230078	3.105120073	2.072780095	0.054782641	0.101739191	-4.75561541	non
Haloperidol	-0.256283524	6.229723159	-2.473045794	0.025049133	0.054163479	-4.760163228	non
4-(Methylnitrosamino)-1-(3-pyridyl)-1-butanone	0.652856536	4.830206034	2.357083549	0.031554513	0.065158547	-4.76469632	up
PC(20:4(8Z,11Z,14Z,17Z)/20:2(11Z,14Z))	0.452953049	3.844227596	2.225724451	0.040827494	0.079888533	-4.765549741	non
Norcotinine	0.270018501	10.50073653	2.523211402	0.022647861	0.049912341	-4.766498285	non
Riboflavin	0.349178323	10.18122487	2.513988647	0.023072247	0.050569955	-4.769638027	non
PC(22:1(13Z)/20:5(5Z,8Z,11Z,14Z,17Z))	0.224529039	5.562697957	2.421803393	0.027749879	0.05881509	-4.772598544	non
Amlodipine	0.198396602	8.067365378	2.49398803	0.024018691	0.052394034	-4.776207054	non
PI(18:0/16:2(9Z,12Z))	-0.308786569	5.02390432	-2.360939998	0.031314708	0.064871953	-4.790899776	non
PC(18:0/P-18:1(9Z))	0.508217118	5.466155069	2.400393009	0.028957891	0.060893116	-4.794440529	up
Carnosine	0.346838912	5.662597347	2.41891363	0.027910103	0.059076691	-4.794804067	non
PC(24:0/18:1(11Z))	0.365371626	4.393169334	2.295901374	0.035597022	0.071438773	-4.796852508	non
DG(14:1(9Z)/20:0/0:0)	0.167791248	7.176134043	2.479153063	0.02474438	0.053612823	-4.799038033	non
Flucloxacillin	0.321233518	6.48409567	2.462926293	0.025561941	0.055086842	-4.800921994	non
PI(16:0/22:2(13Z,16Z))	0.529237962	6.505418537	2.463179699	0.025548979	0.055086842	-4.801153816	up
delta-Tocopherol	-1.126477119	2.896362046	-1.991914494	0.063811476	0.114596561	-4.801880332	non
Alprazolam	0.256160102	5.031336937	2.356012058	0.031621447	0.065254798	-4.802312307	non
Folinic acid	0.293352831	9.093570773	2.483352207	0.024536885	0.053235093	-4.806039896	non
Propanoic acid, 2-(methoxyimino)-, trimethylsilyl ester	-0.33707569	7.714310581	-2.475617071	0.024920395	0.053921421	-4.807640231	non
TG(16:0/20:0/20:1(11Z))	0.399218066	10.00397671	2.488257921	0.024296567	0.052856555	-4.811378285	non
gamma-CEHC	0.295224866	5.186743924	2.361950122	0.031252179	0.064784214	-4.817398774	non
Diethylthiophosphate	-1.950336483	8.159901397	-2.472249553	0.025089127	0.05421345	-4.818848589	down
PC(16:1(9Z)/22:5(7Z,10Z,13Z,16Z,19Z))	1.065095153	5.859003007	2.411195523	0.028342326	0.059833799	-4.822140429	up
Mupirocin	-0.522642391	5.123192363	-2.348314572	0.032106226	0.066042981	-4.829954051	down
PC(16:0/20:4(8Z,11Z,14Z,17Z))	1.212225716	4.24428929	2.230185088	0.040474842	0.07929513	-4.835372513	up
PC(24:0/P-18:0)	0.597486748	4.751073772	2.311247153	0.034539847	0.07006156	-4.835651713	up
6-(4-carboxy-3-hydroxyphenoxy)-3,4,5-trihydroxyoxane-2-carboxylic acid	0.303679079	6.12563048	2.428904665	0.027359828	0.058257565	-4.836341071	non
PE(20:3(5Z,8Z,11Z)/20:2(11Z,14Z))	0.220592735	11.61430562	2.512254091	0.023152903	0.050712122	-4.840326618	non
PC(22:1(13Z)/P-18:1(11Z))	0.495544323	3.163240104	2.039923599	0.058300725	0.10726329	-4.842031507	non
Colistin	-0.542120471	6.406189023	-2.433926549	0.027087124	0.05783029	-4.845345749	down
DG(16:1(9Z)/22:1(13Z)/0:0)	0.62407639	5.242948985	2.351607676	0.031897983	0.065783187	-4.845745075	up
2,3-Dinor-6-keto-prostaglandin F1 a	0.803412302	4.592594192	2.283639176	0.036463413	0.072774242	-4.850931397	up
Piroxicam	0.193057907	7.453365234	2.448522512	0.026309028	0.056620838	-4.857157294	non
Desmopressin	1.813728102	10.84393671	2.482903754	0.024558966	0.053247022	-4.858777345	up
DG(18:2(9Z,12Z)/22:2(13Z,16Z)/0:0)	0.2962005	7.838173774	2.447247153	0.026376164	0.056727303	-4.860897443	non
PI(16:1(9Z)/18:1(9Z))	1.087167758	1.766416164	1.763264492	0.097026827	0.160017022	-4.865853017	non
1-Methylxanthine	0.356135461	5.105900676	2.324798647	0.033630769	0.068347089	-4.872100132	non
Loxapine	0.232466837	6.177553299	2.411685248	0.028314714	0.059814833	-4.873216444	non
Chlorzoxazone	0.751454934	5.135243428	2.326052876	0.033547774	0.068247475	-4.874087298	up
PC(18:3(6Z,9Z,12Z)/22:2(13Z,16Z))	0.205982309	7.356397007	2.439462036	0.026789506	0.057411955	-4.874311212	non
PI(22:3(10Z,13Z,16Z)/18:2(9Z,12Z))	-0.384896656	5.792885684	-2.382806612	0.029987049	0.062728609	-4.874870558	non
Leu-Leu-Leu	1.401776059	2.235604386	1.828948012	0.086192938	0.145512894	-4.876788525	non
Teniposide	0.443034148	6.015203608	2.398066282	0.029092116	0.06113533	-4.881934791	non
PIP(16:2(9Z,12Z)/18:0)	-0.54062034	7.090742452	-2.426206595	0.027507411	0.058475626	-4.89219423	down
Galacturonic acid	0.680060541	7.045705432	2.424730689	0.02758846	0.058550261	-4.897170787	up
Benazepril	-0.52424964	4.761614169	-2.273991072	0.037158894	0.073880624	-4.898974449	down
DG(20:0/18:3(6Z,9Z,12Z)/0:0)	0.651570035	6.900162453	2.421285779	0.027778514	0.058836945	-4.899739169	up
PC(P-18:0/P-18:1(11Z))	1.05019856	6.396802048	2.403061706	0.028804658	0.060690129	-4.900509243	up
Cortolone	-0.620296017	4.252370066	-2.203463384	0.042630421	0.083062064	-4.900720806	down
myo-Inositol	0.186820146	8.889206053	2.433374589	0.027116971	0.057855545	-4.901760875	non
DG(22:5(4Z,7Z,10Z,13Z,16Z)/14:0/0:0)	0.266713756	5.802090092	2.372671723	0.030595681	0.063711239	-4.903444854	non
TG(18:0/18:1(9Z)/18:1(9Z))	-1.606872372	4.539025428	-2.199544136	0.042955377	0.083593767	-4.904200937	down
PC(16:0/18:3(6Z,9Z,12Z))	-0.515319612	6.892114934	-2.416376139	0.028051514	0.059336898	-4.904745442	down
PG(18:1(9Z)/18:2(9Z,12Z))	-1.381648115	2.496776614	-1.846093642	0.083547033	0.141716599	-4.90885211	non
PC(18:1(11Z)/22:4(7Z,10Z,13Z,16Z))	-0.663709883	0.391606154	-1.518827126	0.148404848	0.221434929	-4.912026516	non
L-Cystine	1.969512818	6.191595202	2.364857826	0.03107284	0.064495727	-4.914706666	up
Cyclo(Leu-Phe)	0.430920026	3.957356035	2.162038472	0.046183006	0.088375227	-4.917154607	non
2-hydroxyphenylpropionylglycine	0.160707806	6.399874933	2.389661071	0.029581896	0.061921426	-4.932124762	non
Glycochenodeoxycholic acid 3-glucuronide	1.800237949	5.225270333	2.28904793	0.036078857	0.072135248	-4.932362639	up
MG(0:0/20:4(8Z,11Z,14Z,17Z)/0:0)	-0.781554542	6.863564445	-2.396224339	0.029198789	0.061319367	-4.936248634	down
14R,15S-EpETrE	0.42593155	4.898554013	2.269408961	0.037493508	0.074330735	-4.938690755	non
PC(20:2(11Z,14Z)/20:3(8Z,11Z,14Z))	0.177261787	6.034702653	2.369109283	0.030812362	0.064079336	-4.939307839	non
DG(20:2(11Z,14Z)/18:2(9Z,12Z)/0:0)	-1.704986854	2.658439019	-1.840176285	0.084451945	0.143024893	-4.942359499	non
DG(22:5(7Z,10Z,13Z,16Z,19Z)/18:2(9Z,12Z)/0:0)	1.121443932	3.773662305	2.077829535	0.054259489	0.100942769	-4.963067812	non
PC(18:3(9Z,12Z,15Z)/P-18:1(9Z))	-0.231861415	6.767680343	-2.382465997	0.030007318	0.062730141	-4.967165165	non
Arachidonoylcarnitine	-0.377785169	6.055223867	-2.349637839	0.032022395	0.065912763	-4.970407658	non
4,6-octadienoylglycine	0.270660517	8.880156312	2.394157664	0.029318917	0.06149121	-4.975208557	non
3-Aminosalicylic acid	0.310602614	3.996963119	2.136288916	0.048526896	0.092037723	-4.977398157	non
PC(18:4(6Z,9Z,12Z,15Z)/20:0)	0.318281411	5.820272035	2.332656022	0.033113983	0.067510476	-4.979833769	non
PC(20:3(5Z,8Z,11Z)/18:3(6Z,9Z,12Z))	1.116125121	0.880062919	1.540690889	0.1430225	0.21570937	-4.980661482	non
Ipratropium bromide	0.43470408	5.944375641	2.340236051	0.032622498	0.066762805	-4.981067993	non
Alpha-Cryptoxanthin	0.369415539	3.914284949	2.116957415	0.050357953	0.094716132	-4.983271855	non
8-Hydroxy-7-methylguanine	-1.377898644	1.851271617	-1.682903607	0.111888895	0.178832873	-4.983568899	non
DG(14:0/22:2(13Z,16Z)/0:0)	-0.422040305	6.22877526	-2.351127477	0.031928269	0.065803385	-4.985889672	non
Pentamidine	0.298326823	7.756589916	2.379523159	0.030182972	0.063015295	-4.986970755	non
Venlafaxine	0.196747379	4.969551562	2.247786674	0.039110709	0.07699846	-4.989731868	non
N-Acetyl-L-methionine	0.50086632	3.400889681	2.002627344	0.062542414	0.112695675	-4.990233628	non
Ertapenem	0.355531743	-0.550520245	1.32332655	0.204409268	0.287498098	-4.996232187	non
6-[4-(carboxymethyl)phenoxy]-3,4,5-trihydroxyoxane-2-carboxylic acid	1.394503236	2.108395289	1.72777895	0.103362794	0.167794707	-4.997620281	non
DG(18:1(9Z)/14:1(9Z)/0:0)	0.276790937	8.458503082	2.378790643	0.030226845	0.063065887	-5.002625783	non
PC(P-18:1(9Z)/P-18:1(9Z))	0.286924753	8.041514214	2.370859289	0.03070574	0.063898984	-5.006905006	non
Cimetidine	-0.264541233	5.352595227	-2.273340957	0.037206199	0.073928902	-5.00763441	non
Arachidyl carnitine	0.885651993	4.166536563	2.13411947	0.048729291	0.092339961	-5.007833486	up
DG(18:1(9Z)/16:1(9Z)/0:0)	0.319576349	5.623321702	2.298622395	0.035407391	0.07122989	-5.010654338	non
PC(18:0/22:1(13Z))	-0.548503004	5.784003028	-2.305029774	0.034964577	0.070619821	-5.012130388	down
PC(18:1(9Z)/22:0)	-0.474969658	4.874178795	-2.223644577	0.040992899	0.080163337	-5.012413357	non
6-[5-(4-carboxy-2-hydroxybutyl)-2-hydroxyphenoxy]-3,4,5-trihydroxyoxane-2-carboxylic acid	-0.73858054	4.230242164	-2.131967836	0.048930791	0.092639605	-5.013084406	down
Malathion	0.166180822	7.344216653	2.363443276	0.031159964	0.064634784	-5.016228228	non
LysoPA(0:0/18:0)	-0.471218552	6.437814965	-2.343827321	0.032392038	0.066418157	-5.016383455	non
MG(20:1(11Z)/0:0/0:0)	-0.321993566	5.250574085	-2.258585073	0.038295115	0.075624609	-5.016667953	non
Putreanine	0.164294746	7.643642149	2.360476105	0.031343463	0.064889659	-5.021771306	non
PC(18:1(9Z)/20:3(8Z,11Z,14Z))	-0.344615276	5.918478631	-2.312865561	0.034430083	0.069883056	-5.021832652	non
Propantheline	0.298310273	4.388527107	2.169857922	0.045492162	0.087261249	-5.022731001	non
PC(22:1(13Z)/14:0)	0.287204867	7.445901075	2.359418188	0.031409133	0.064941872	-5.023608456	non
5-Acetylamino-6-amino-3-methyluracil	0.337817836	9.188385629	2.366250457	0.030987289	0.064401415	-5.025311392	non
LysoPE(0:0/16:0)	0.547521368	6.619415727	2.344425742	0.032353784	0.06638211	-5.030221261	up
PI(18:1(11Z)/20:1(11Z))	1.225536257	1.702471561	1.637335716	0.121161898	0.190337991	-5.031707071	non
Cer(d18:0/18:1(9Z))	0.583958141	4.653227358	2.191777317	0.04360613	0.084654948	-5.03343686	up
DG(16:0/18:2(9Z,12Z)/0:0)	-0.720040733	4.144097647	-2.100462807	0.051970213	0.097360767	-5.04182565	non
L-Sorbose	1.255958503	2.161869056	1.711695127	0.106351393	0.171260945	-5.041999077	non
DG(22:2(13Z,16Z)/14:1(9Z)/0:0)	-0.450227172	6.048357449	-2.307971061	0.034763043	0.070292273	-5.044586986	non
PC(18:3(9Z,12Z,15Z)/16:0)	0.429187774	3.722649905	2.036743257	0.058651954	0.107741089	-5.052904662	non
Oseltamivir	0.846231127	3.6970995	2.019866998	0.060548121	0.110484199	-5.054957256	non
PC(18:1(9Z)/16:0)	-0.275963546	3.620284079	-2.008501087	0.061856346	0.111962078	-5.055804498	non
Dextrothyroxine	0.53933051	3.911492064	2.070459226	0.055024639	0.102129546	-5.057455139	non
PE(P-16:0/20:4(8Z,11Z,14Z,17Z))	0.333459341	7.334111636	2.33781918	0.032778459	0.066996583	-5.063525408	non
Thromboxane B2	0.17948275	7.444413803	2.337044928	0.032828569	0.067056321	-5.064915419	non
Cortol	0.327534007	1.441161561	1.577705793	0.134284867	0.205371197	-5.066612797	non
PI(20:2(11Z,14Z)/20:2(11Z,14Z))	-0.50513681	3.271607567	-1.91750738	0.073286704	0.127754401	-5.073502538	non
PC(20:2(11Z,14Z)/14:0)	0.174142986	8.097546289	2.33501153	0.032960515	0.067251304	-5.074392954	non
3-hydroxyoct-7-enoylglycine	-0.265794453	3.203643042	-1.904820833	0.075022766	0.130004372	-5.077335859	non
PC(20:3(5Z,8Z,11Z)/P-18:0)	0.271395011	6.838624532	2.325860382	0.033560499	0.068247475	-5.07746178	non
PC(18:1(9Z)/22:2(13Z,16Z))	-0.247460095	6.304199174	-2.304680951	0.03498855	0.070619821	-5.080183704	non
Dihydroxyacetone phosphate	-1.107478118	1.884475895	-1.626051622	0.123557564	0.193344707	-5.084979795	non
TG(18:1(9Z)/18:1(9Z)/20:1(11Z))	-0.79248529	4.34971413	-2.106593877	0.051365487	0.096396598	-5.086086684	non
PC(14:0/18:3(9Z,12Z,15Z))	-0.495613218	5.958671285	-2.274593728	0.037115092	0.073839256	-5.09269312	non
PC(22:5(4Z,7Z,10Z,13Z,16Z)/20:1(11Z))	0.393727725	6.518684822	2.304645161	0.034991011	0.070619821	-5.097509169	non
DG(18:4(6Z,9Z,12Z,15Z)/20:2(11Z,14Z)/0:0)	0.173183347	5.684876358	2.253511804	0.038676304	0.076236716	-5.103237728	non
4-Methoxyphenylacetic acid	0.293460326	5.709770723	2.253665747	0.038664685	0.076236716	-5.10697354	non
PC(18:1(9Z)/P-18:1(9Z))	-0.488028254	6.711263739	-2.301550102	0.035204411	0.070872328	-5.110172033	non
Ganglioside GD3 (d18:1/16:0)	-0.898649224	4.399533528	-2.095858286	0.052428652	0.098105129	-5.110561479	non
PC(22:0/20:4(8Z,11Z,14Z,17Z))	0.401599712	7.176626649	2.310765593	0.034572571	0.070080977	-5.112648856	non
TG(22:6(4Z,7Z,10Z,13Z,16Z,19Z)/18:2(9Z,12Z)/22:6(4Z,7Z,10Z,13Z,16Z,19Z))	0.248199008	6.520819911	2.296183443	0.03557732	0.071438773	-5.113477406	non
14,15-DiHETrE	-0.494128648	3.893859939	-2.021772295	0.060331294	0.110258272	-5.115717472	non
3-octenoylglycine	1.179152142	1.375896366	1.519753581	0.148173381	0.221192342	-5.117467438	non
N-Methyltryptamine	0.27383955	9.623662597	2.317945294	0.034087678	0.069231837	-5.117943406	non
6-Hydroxygliclazide	-0.695070189	3.105343188	-1.849856437	0.082976091	0.140897	-5.118086852	non
PC(14:0/24:1(15Z))	-0.256364214	7.64010991	-2.308464078	0.034729368	0.070268432	-5.118247529	non
3-Oxotetradecanoic acid	0.528054578	1.979298454	1.63567474	0.121512013	0.190701405	-5.119364387	non
Ecgonine methyl ester	0.489831254	6.031734925	2.26930646	0.037501025	0.074330735	-5.120109255	non
Vinblastine	0.202481063	5.771665735	2.251153308	0.038854713	0.0765414	-5.121587303	non
PC(16:1(9Z)/16:1(9Z))	-0.389205618	3.561406168	-1.952500841	0.068683306	0.121443884	-5.123491706	non
Heptyl cyclohexane carboxylic acid	1.185975979	1.983302106	1.623218242	0.124165432	0.194012264	-5.124729127	non
3-Methoxytyrosine	0.181081385	7.492481912	2.304283274	0.0350159	0.070625662	-5.125052634	non
PC(22:0/P-18:0)	0.314359796	11.22464952	2.35017815	0.031988224	0.065884662	-5.126342179	non
PI(16:0/22:4(10Z,13Z,16Z,19Z))	0.474052121	7.721753461	2.303174999	0.035092225	0.070707434	-5.127899899	non
DG(22:6(4Z,7Z,10Z,13Z,16Z,19Z)/18:0/0:0)	-0.59254639	3.19551924	-1.861781584	0.081189467	0.138669882	-5.133487382	non
PC(18:2(9Z,12Z)/14:0)	-0.534146337	0.368307327	-1.335658313	0.200434362	0.283147707	-5.138167259	non
CE(20:0)	-0.501617081	2.683253484	-1.753807714	0.098681234	0.161831176	-5.13818117	non
MG(0:0/22:5(4Z,7Z,10Z,13Z,16Z)/0:0)	-0.627034517	7.65579948	-2.298349187	0.035426389	0.07122989	-5.138443268	down
5-Methoxyindoleacetate	0.358720687	6.86734605	2.291398748	0.035912899	0.071909067	-5.141462939	non
Norepinephrine sulfate	0.942664873	5.1518422	2.177720251	0.044807156	0.086463809	-5.143368098	up
Metixene	-0.254141763	4.714393781	-2.133964635	0.048743766	0.092339961	-5.145733973	non
Tetrahydrodeoxycortisol	0.183119989	6.00742601	2.254409073	0.03860863	0.076196872	-5.146519872	non
PG(16:0/16:1(9Z))	0.256947477	4.958474607	2.155411426	0.046776062	0.089297227	-5.152689823	non
PC(18:3(6Z,9Z,12Z)/P-18:0)	-0.50294395	5.628871128	-2.215402288	0.041654511	0.081358051	-5.153712993	down
Cer(d18:0/20:0)	-0.633550048	2.809005437	-1.763325434	0.097016245	0.160017022	-5.159946193	non
PC(14:0/22:2(13Z,16Z))	0.414587939	4.321545804	2.081088576	0.053924262	0.100377278	-5.160811854	non
DG(18:1(9Z)/22:4(7Z,10Z,13Z,16Z)/0:0)	0.595114128	6.493452869	2.267873915	0.037606233	0.074493284	-5.161772111	up
Caspofungin	0.193815913	7.619177258	2.283596747	0.036466445	0.072774242	-5.162934095	non
Lacto-N-fucopentaose V	0.807773041	4.598209257	2.108058651	0.05122197	0.096183477	-5.164352999	non
PA(16:0/18:2(9Z,12Z))	0.242477255	4.524903606	2.104208797	0.051599964	0.096723576	-5.166494484	non
PE(22:4(7Z,10Z,13Z,16Z)/18:0)	0.135637337	8.748998988	2.289854857	0.036021811	0.072066065	-5.168344585	non
MG(20:4(5Z,8Z,11Z,14Z)/0:0/0:0)	0.536650412	7.283968297	2.277953898	0.036871751	0.073446149	-5.172736481	up
PG(18:2(9Z,12Z)/18:3(9Z,12Z,15Z))	1.424643303	2.263653391	1.634672225	0.121723752	0.190940384	-5.175878676	non
DG(14:0/24:1(15Z)/0:0)	-0.259279547	4.817095157	-2.126457909	0.049450291	0.093347962	-5.177337795	non
Coproporphyrinogen I	0.268441953	6.983064176	2.270986742	0.037377973	0.074178412	-5.18273023	non
Valaciclovir	0.297434932	5.012690153	2.142198078	0.047979526	0.091215072	-5.184790687	non
Gentamicin	0.418050768	5.525044747	2.190910965	0.043679281	0.084745723	-5.187368611	non
PC(20:0/20:3(8Z,11Z,14Z))	0.413993191	6.929383718	2.265702336	0.03776624	0.074718052	-5.190113448	non
PC(24:1(15Z)/P-18:1(9Z))	0.284348286	5.440510583	2.178724326	0.044720365	0.086348222	-5.194477495	non
PC(16:0/24:0)	-0.324599239	4.845408463	-2.117475193	0.050308094	0.094716132	-5.197151653	non
PC(P-18:1(11Z)/18:1(11Z))	-0.557450983	7.317402723	-2.25973447	0.038209241	0.075547951	-5.204233772	down
2-hydroxyoct-7-enoylglycine	0.19841045	7.754340972	2.258851416	0.0382752	0.075624609	-5.208397029	non
Val-Val-Val	-0.42153072	9.247726171	-2.267123326	0.037661467	0.074556701	-5.209026848	non
PE(16:0/18:1(9Z))	0.743960161	5.532544083	2.176979032	0.044871326	0.086535632	-5.21001832	up
PC(P-18:0/20:1(11Z))	1.180172885	1.021822112	1.38069186	0.186442026	0.266547348	-5.216583123	non
PI(22:5(4Z,7Z,10Z,13Z,16Z)/18:0)	0.160540465	6.2225867	2.226081815	0.040799137	0.079881724	-5.217493371	non
Ampicillin	0.657970651	5.547433234	2.172397089	0.045269887	0.087095031	-5.221891224	up
LacCer(d18:1/22:0)	-0.365460165	4.710457187	-2.087835364	0.053236292	0.099292271	-5.223153984	non
DG(20:0/18:1(11Z)/0:0)	-0.334077769	5.142513359	-2.129849194	0.049129949	0.092961855	-5.227536495	non
myo-Inositol 1-phosphate	0.188166801	7.44477302	2.245605227	0.039277422	0.077231967	-5.231773302	non
Loperamide	0.176039453	5.672689365	2.17989575	0.044619305	0.086256827	-5.233153087	non
PC(22:5(4Z,7Z,10Z,13Z,16Z)/P-18:1(11Z))	0.540838135	3.417307905	1.856724179	0.081942949	0.139659665	-5.234965662	non
gamma-Glutamylvaline	0.717766182	3.328496845	1.829046567	0.08617752	0.145512894	-5.241840802	non
DG(18:1(9Z)/18:4(6Z,9Z,12Z,15Z)/0:0)	0.292268356	5.598766303	2.165644117	0.045863255	0.087868086	-5.245670123	non
PE(24:1(15Z)/14:0)	0.660457855	6.237113046	2.208460839	0.042219369	0.082311108	-5.248301645	up
PC(14:1(9Z)/22:1(13Z))	-0.334383309	8.18336311	-2.24009811	0.039701235	0.077922168	-5.250256528	non
DG(18:2(9Z,12Z)/18:1(11Z)/0:0)	-0.644948332	3.440031782	-1.833737954	0.085446387	0.144480436	-5.260335512	non
DG(22:0/14:1(9Z)/0:0)	0.952980234	5.336480119	2.128792691	0.049229542	0.093040646	-5.260470161	up
DG(20:3(5Z,8Z,11Z)/16:0/0:0)	-0.789630258	4.049089412	-1.948375348	0.069212153	0.122177143	-5.265658536	non
Glycerophosphocholine	0.43071412	5.709513858	2.157227474	0.046612849	0.089042355	-5.278183785	non
Myristoleic acid	0.324587276	10.45002419	2.244139313	0.039389822	0.077405581	-5.283204715	non
Glutamyllysine	0.438722976	4.103125054	1.973326614	0.066068801	0.117598072	-5.285574272	non
DG(22:5(7Z,10Z,13Z,16Z,19Z)/14:0/0:0)	-1.085136429	4.616414951	-2.019779103	0.060558141	0.110484199	-5.28585625	non
Leukotriene E4	0.219905611	7.622526172	2.214043935	0.041764492	0.081523274	-5.288668452	non
TG(16:0/20:1(11Z)/20:1(11Z))	-0.311129545	13.1885495	-2.309475223	0.034660399	0.070173103	-5.294529088	non
DG(20:2(11Z,14Z)/20:3(8Z,11Z,14Z)/0:0)	-0.351134966	6.05193134	-2.169862329	0.045491775	0.087261249	-5.296058016	non
PE(22:4(7Z,10Z,13Z,16Z)/P-18:0)	0.695760546	3.583524463	1.853412756	0.082439664	0.140282863	-5.296175127	non
PG(18:1(9Z)/22:4(7Z,10Z,13Z,16Z))	-1.023582013	3.244864836	-1.752943012	0.098833733	0.161998528	-5.300063016	non
Terconazole	-0.370732262	6.423673955	-2.184802395	0.044198293	0.085597538	-5.304852448	non
18-Hydroxyarachidonic acid	0.260729765	4.782651128	2.050121071	0.057187413	0.105533783	-5.306881419	non
Equol	0.682068937	5.256855762	2.09478437	0.052536105	0.098248942	-5.308341559	non
1-hydroxyhexanoylglycine	1.327492598	1.592667282	1.410455467	0.177635935	0.256585239	-5.309668192	non
TG(22:5(7Z,10Z,13Z,16Z,19Z)/18:3(9Z,12Z,15Z)/22:5(7Z,10Z,13Z,16Z,19Z))	0.15772326	6.239062866	2.171963842	0.045307742	0.087115663	-5.315486445	non
PG(18:2(9Z,12Z)/18:0)	1.345663179	2.772945878	1.641902753	0.120203671	0.189202935	-5.317911087	non
TG(18:0/20:0/20:4(5Z,8Z,11Z,14Z))	0.274217148	5.937701859	2.153864752	0.046915481	0.089457014	-5.318121987	non
DG(14:0/18:2(9Z,12Z)/0:0)	-0.263776149	6.78776307	-2.189601135	0.043790093	0.084909414	-5.319195544	non
PC(P-18:1(9Z)/20:0)	-0.293777135	5.310270788	-2.09348558	0.052666328	0.098435146	-5.319718111	non
4-Hydroxy-3-methylbenzoic acid	-0.725954618	6.458389337	-2.173979303	0.04513189	0.086928377	-5.321127592	down
Prostaglandin F1a	-0.529324812	4.864195643	-2.042734067	0.057991938	0.106956987	-5.326689894	non
PC(P-18:0/20:4(5Z,8Z,11Z,14Z))	0.353765686	8.095262139	2.195369707	0.043304011	0.084170206	-5.327865105	non
DG(18:2(9Z,12Z)/18:2(9Z,12Z)/0:0)	0.619377853	5.83560924	2.137931037	0.048374212	0.091847795	-5.327999889	up
PE(P-18:0/22:5(7Z,10Z,13Z,16Z,19Z))	-0.505414874	6.539859021	-2.173700337	0.045156192	0.086928377	-5.33097095	down
Amoxapine	-0.603611853	5.842268022	-2.12912338	0.049198349	0.093036454	-5.333644182	down
Dihydrodaidzein	0.206001678	9.882095398	2.201604208	0.042784286	0.083311305	-5.335692144	non
PC(18:4(6Z,9Z,12Z,15Z)/22:0)	0.26790874	8.509239646	2.196214875	0.043233215	0.084083497	-5.336271608	non
PC(20:4(8Z,11Z,14Z,17Z)/18:0)	0.893177055	3.248810777	1.74530467	0.100189807	0.163719831	-5.337250353	non
PC(P-16:0/20:4(8Z,11Z,14Z,17Z))	0.364350824	4.541269545	2.004002852	0.062381136	0.11246818	-5.340849772	non
Lidocaine	0.192210353	6.066335664	2.148481376	0.047403736	0.090227265	-5.341905208	non
6-(4-carboxy-2,6-dihydroxyphenoxy)-3,4,5-trihydroxyoxane-2-carboxylic acid	-0.230340554	6.815443733	-2.176367144	0.044924363	0.086585912	-5.34431013	non
Allopregnanolone	0.37165966	4.934921643	2.04214707	0.058056309	0.10701424	-5.345504537	non
PC(18:1(9Z)/16:1(9Z))	-0.904947843	9.529282032	-2.192910651	0.043510607	0.084520605	-5.350203434	down
Geraniol	0.149488476	6.364732022	2.157205469	0.046614824	0.089042355	-5.351641239	non
DG(20:0/18:0/0:0)	-0.332217973	7.788727464	-2.180045081	0.044606438	0.086256827	-5.351653543	non
DG(18:1(9Z)/20:4(5Z,8Z,11Z,14Z)/0:0)	-0.71090578	3.244087382	-1.726348299	0.103625634	0.167966639	-5.356637542	non
PC(P-18:0/22:2(13Z,16Z))	0.376137823	3.679466829	1.843058212	0.084010146	0.142401301	-5.3575432	non
PC(20:4(5Z,8Z,11Z,14Z)/18:1(9Z))	0.53406997	4.363201799	1.968125349	0.066713229	0.118547968	-5.359836105	non
PC(18:1(9Z)/20:4(8Z,11Z,14Z,17Z))	-0.41466794	11.61050088	-2.231595429	0.040363932	0.079174457	-5.360803729	non
PE(P-18:1(11Z)/18:0)	-0.406317998	6.149048278	-2.137765488	0.048389585	0.091847795	-5.362753411	non
DG(22:5(4Z,7Z,10Z,13Z,16Z)/18:1(11Z)/0:0)	-0.475076086	4.941061333	-2.025432	0.059916787	0.109625529	-5.371304404	non
Panthenol	0.206891547	7.232092054	2.167224697	0.045723734	0.08765308	-5.371993563	non
DG(18:0/22:5(7Z,10Z,13Z,16Z,19Z)/0:0)	0.118960745	6.967876759	2.163706288	0.046034848	0.088144244	-5.374829179	non
PE(14:1(9Z)/24:1(15Z))	1.585321639	3.571108847	1.762806343	0.097106414	0.160066065	-5.375325441	non
PIP(16:2(9Z,12Z)/22:3(10Z,13Z,16Z))	0.479595056	4.754125275	2.005026184	0.062261395	0.112342393	-5.377322066	non
Perindopril	-1.178856702	4.703949072	-1.975014799	0.065860849	0.117358039	-5.378435196	non
Prolylphenylalanine	1.281400476	1.673722193	1.373001957	0.188773847	0.269042531	-5.37869493	non
DG(18:1(11Z)/16:1(9Z)/0:0)	-0.27604538	6.764762924	-2.15486462	0.046825309	0.089338126	-5.37959679	non
Arachidyl alcohol	-1.394052224	4.327303005	-1.892056739	0.076806474	0.132880167	-5.3809854	non
DG(18:4(6Z,9Z,12Z,15Z)/18:0/0:0)	0.62972845	4.111569573	1.913658659	0.073809532	0.128387004	-5.381055366	non
PE(20:1(11Z)/16:0)	0.287913203	5.274652704	2.053976141	0.056771603	0.104887006	-5.382740752	non
5,6-Epoxy-8,11,14-eicosatrienoic acid	0.295169019	4.680607703	1.994240759	0.063533939	0.114161991	-5.383908468	non
DG(18:1(9Z)/20:1(11Z)/0:0)	0.282898036	5.510104685	2.075189251	0.054532466	0.101391864	-5.388352654	non
PG(18:1(9Z)/20:3(8Z,11Z,14Z))	-1.141553389	4.765840477	-1.980398585	0.065201611	0.116441809	-5.389245908	non
TG(16:0/16:0/16:1(9Z))	-0.4814262	7.640482995	-2.158230767	0.046522906	0.088972633	-5.389635528	non
PI(18:1(11Z)/16:1(9Z))	0.364841116	3.722305554	1.832633895	0.085617954	0.144694342	-5.390075573	non
Sialyllacto-N-neotetraose c	0.713105069	5.496574713	2.069673322	0.055106806	0.102222967	-5.392466854	non
DG(16:0/14:0/0:0)	-0.336244123	7.610843104	-2.153278287	0.046968446	0.089504855	-5.397633892	non
9-Methyluric acid	-0.959408036	3.646736177	-1.775007118	0.095006383	0.157331354	-5.398480461	non
Quinolinic acid	-1.164744657	5.021043923	-2.004898013	0.062276381	0.112342393	-5.404497402	non
Dolasetron	0.500946841	3.298614067	1.715043121	0.105723172	0.17059151	-5.413130604	non
PC(15:0/15:0)	-0.443898519	4.868221257	-1.991410803	0.063871714	0.114640622	-5.415943793	non
PC(20:4(5Z,8Z,11Z,14Z)/P-16:0)	1.507197418	3.581522774	1.742089799	0.100765402	0.16457343	-5.417379964	non
PC(18:1(11Z)/24:1(15Z))	0.845058156	6.581109146	2.124185881	0.049665979	0.093700034	-5.421385167	up
PC(18:1(11Z)/24:0)	-0.791007397	4.905638973	-1.988075704	0.064271866	0.115165716	-5.421757725	non
PG(18:3(9Z,12Z,15Z)/18:2(9Z,12Z))	0.900479864	5.58109308	2.056798345	0.056468947	0.104448036	-5.425029863	non
DG(22:5(4Z,7Z,10Z,13Z,16Z)/14:1(9Z)/0:0)	0.387680419	5.728336023	2.07466662	0.054586649	0.101433872	-5.425894796	non
DG(22:4(7Z,10Z,13Z,16Z)/18:1(9Z)/0:0)	0.145884944	6.442316648	2.116854404	0.050367877	0.094716132	-5.42850723	non
Prostaglandin D3	-0.979939678	5.516179361	-2.039702865	0.058325041	0.10726329	-5.432548829	non
Apigenin	-0.563254937	4.251128164	-1.891576906	0.076874261	0.132925822	-5.437111011	non
Thiethylperazine	-0.636887836	2.969540662	-1.607108568	0.127670349	0.198138952	-5.444162053	non
PE(18:0/18:1(9Z))	1.314250574	3.166030386	1.638636346	0.120888343	0.190094255	-5.451569217	non
PC(18:3(9Z,12Z,15Z)/18:3(6Z,9Z,12Z))	0.402105964	6.80013504	2.115598082	0.050489065	0.094862719	-5.45266993	non
2,3-octadienoylglycine	0.140868998	8.605826174	2.128373387	0.049269119	0.093060672	-5.45731461	non
Idoxuridine	0.380585604	5.038124489	1.985836825	0.064541762	0.115584829	-5.458004751	non
PG(16:1(9Z)/22:5(4Z,7Z,10Z,13Z,16Z))	0.468593825	2.999606278	1.608052009	0.127462787	0.197993444	-5.465762399	non
PI(18:0/22:6(4Z,7Z,10Z,13Z,16Z,19Z))	1.092909743	3.81651877	1.779644673	0.094218669	0.156349429	-5.468871616	non
hydroxyvalerylglycine	0.307334606	5.57106143	2.033161817	0.059049782	0.108347914	-5.471244851	non
Phenylalanylproline	1.270036294	2.274511253	1.426597597	0.173003718	0.251082382	-5.471251229	non
PI(20:4(8Z,11Z,14Z,17Z)/18:1(9Z))	0.239782774	6.593496687	2.091104396	0.052905845	0.09876783	-5.484160606	non
Cetoleic acid	0.263144668	4.625240476	1.925488751	0.072213042	0.125951156	-5.488660472	non
8-Hydroxyguanine	0.92887934	2.397188252	1.44718988	0.167238633	0.244648405	-5.490076962	non
PE(20:0/20:5(5Z,8Z,11Z,14Z,17Z))	-0.370401052	2.950450464	-1.573971507	0.135145386	0.206348947	-5.492861444	non
PC(14:1(9Z)/18:2(9Z,12Z))	1.431296384	6.252134415	2.05823174	0.056315793	0.104284897	-5.494436235	non
DG(16:0/22:5(4Z,7Z,10Z,13Z,16Z)/0:0)	-0.412326562	5.460342639	-2.005645507	0.062189029	0.112311007	-5.494752418	non
Cer(d18:0/26:1(17Z))	0.873463011	4.748325089	1.928157531	0.071857195	0.125535067	-5.498289125	non
DG(18:3(9Z,12Z,15Z)/18:3(6Z,9Z,12Z)/0:0)	-0.986536419	2.483570146	-1.443959751	0.168132358	0.245508414	-5.504837246	non
PC(P-16:0/16:0)	-0.401296667	6.838826086	-2.082473017	0.053782431	0.100229475	-5.507643854	non
Mono-(2-ethyl-5-carboxypentyl) phthalate	-0.565246856	5.3545561	-1.984384789	0.064717352	0.11583468	-5.511519021	non
6-[3-(2-carboxyethyl)-5-hydroxyphenoxy]-3,4,5-trihydroxyoxane-2-carboxylic acid	0.79231402	-0.250177118	0.836554327	0.415218062	0.512794307	-5.513385337	non
DG(20:3(8Z,11Z,14Z)/20:4(5Z,8Z,11Z,14Z)/0:0)	-0.17275822	3.427363635	-1.678682315	0.112721393	0.179984283	-5.514021393	non
Marimastat	0.307325572	4.068465181	1.827337069	0.086445311	0.145844284	-5.516249262	non
PC(P-16:0/22:5(4Z,7Z,10Z,13Z,16Z))	0.45077665	5.424301619	1.990358751	0.063997697	0.114802573	-5.517286957	non
Thiamine pyrophosphate	0.56189814	13.08481676	2.183223958	0.044333328	0.085807303	-5.517592377	up
PG(18:3(9Z,12Z,15Z)/20:3(5Z,8Z,11Z))	0.858116496	4.756596702	1.915979769	0.073493823	0.127976501	-5.520286123	non
PC(18:1(9Z)/18:3(9Z,12Z,15Z))	-0.437110095	3.70011062	-1.732630688	0.102475748	0.166691808	-5.52039798	non
DG(14:0/20:3(5Z,8Z,11Z)/0:0)	-0.378513088	4.960586695	-1.93445811	0.071023331	0.124416756	-5.528811759	non
N-Acetyl-D-glucosamine	2.112085886	4.847835478	1.880642154	0.078433573	0.134823449	-5.531262457	non
Alpha-linolenyl carnitine	-0.727701577	5.276899075	-1.961146976	0.067586742	0.119834914	-5.535715698	non
6-trans-Leukotriene B4	0.158956725	6.22386599	2.040952418	0.058187515	0.107194556	-5.542725135	non
PC(20:0/P-18:1(9Z))	0.258025833	2.717558086	1.486084661	0.156781443	0.231886327	-5.545000637	non
Mono-(2-ethyl-5-oxohexyl) phthalate	-0.368923498	3.280549037	-1.616940274	0.125521407	0.195465198	-5.546165625	non
TG(22:5(7Z,10Z,13Z,16Z,19Z)/18:3(9Z,12Z,15Z)/22:6(4Z,7Z,10Z,13Z,16Z,19Z))	0.816465393	0.288729741	0.926310734	0.368108101	0.464438158	-5.546429069	non
Vanilpyruvic acid	0.390720474	4.803675089	1.907705381	0.074624835	0.129524511	-5.54887702	non
GlcCer(d18:1/12:0)	0.173364559	7.902036224	2.06709338	0.055377331	0.10266548	-5.549309394	non
Erythromycin	0.735597499	4.242330508	1.826661227	0.086551384	0.145844284	-5.552617929	non
DG(18:0/22:4(7Z,10Z,13Z,16Z)/0:0)	-0.266778614	4.198295739	-1.821435308	0.087375482	0.146968399	-5.552709756	non
PE(14:0/22:1(13Z))	0.194527689	5.346645289	1.959056191	0.067850454	0.120169779	-5.556372972	non
O-Desmethylverapamil (D-703)	1.783524155	6.353355072	2.016875162	0.060890027	0.110912507	-5.560371216	non
PE(16:0/P-18:1(9Z))	0.239557571	6.217576787	2.028697262	0.059549142	0.109136577	-5.563131351	non
3-Methylsulfinylpropyl isothiocyanate	-0.424989504	3.811378957	-1.730675225	0.102832465	0.167018233	-5.563262752	non
Cyanidin	0.224217179	7.862724955	2.058351662	0.056302997	0.104284897	-5.563878841	non
6-hydroxyoct-7-enoylglycine	1.28039327	3.001835654	1.521580308	0.147717876	0.220717589	-5.564577728	non
Palmitic acid	-0.468525299	6.222590988	-2.024239521	0.060051565	0.109809553	-5.566202665	non
Octreotide	0.299290296	7.197232588	2.054649929	0.056699211	0.104813568	-5.568436001	non
PC(16:1(9Z)/20:4(8Z,11Z,14Z,17Z))	-0.491017208	5.416245226	-1.956377749	0.068189643	0.120637434	-5.569400231	non
1,6-octadienoylglycine	0.169434392	5.579296459	1.976151269	0.065721191	0.117174205	-5.569480596	non
Nonyl cyclopropane	0.239868901	4.767063474	1.890783103	0.07698652	0.133034123	-5.570921094	non
PC(18:1(9Z)/22:4(7Z,10Z,13Z,16Z))	-0.154567173	11.44519091	-2.106062373	0.051417655	0.096438136	-5.575934676	non
Etonogestrel	0.411061369	5.375321207	1.949017804	0.069129556	0.122098463	-5.577963994	non
2-Keto-3-deoxy-D-gluconic acid	1.307419597	6.992087276	2.035529675	0.058786485	0.107926475	-5.58486079	non
PG(18:0/22:5(4Z,7Z,10Z,13Z,16Z))	-1.155815542	5.573440042	-1.950621907	0.068923714	0.121801896	-5.585218672	non
DG(16:1(9Z)/16:0/0:0)	-0.165350231	6.504767257	-2.027791556	0.059650912	0.109201299	-5.58595635	non
Thyroxine sulfate	-0.886189571	3.483072932	-1.620091885	0.124839119	0.194780569	-5.587022873	non
Etiocholanolone glucuronide	0.625693252	11.33524722	2.096286783	0.052385834	0.098082165	-5.587698122	non
CE(22:2(13Z,16Z))	-0.432242773	3.056320599	-1.530074759	0.145615112	0.218592859	-5.589196767	non
TG(18:0/18:2(9Z,12Z)/20:4(5Z,8Z,11Z,14Z))	0.302284156	6.231556776	2.012104132	0.061438884	0.111473793	-5.592469869	non
Pyrophosphate	0.220391691	7.724004215	2.040426596	0.058245351	0.107239577	-5.593552498	non
PG(18:3(9Z,12Z,15Z)/22:5(4Z,7Z,10Z,13Z,16Z))	0.850799503	4.789753904	1.874940851	0.079257722	0.136053096	-5.593767406	non
PG(16:1(9Z)/20:3(5Z,8Z,11Z))	0.325199357	5.706497435	1.973602096	0.066034827	0.117598072	-5.595109871	non
6-[3-(2-carboxyeth-1-en-1-yl)phenoxy]-3,4,5-trihydroxyoxane-2-carboxylic acid	0.304253564	4.923931137	1.890548287	0.077019755	0.133034123	-5.597279178	non
Atomoxetine	0.507109317	4.225025772	1.801572724	0.090571298	0.151392211	-5.597497827	non
Midodrine	0.654289675	4.040874447	1.761486429	0.097336021	0.160197829	-5.600792849	non
DG(20:3(8Z,11Z,14Z)/20:3(5Z,8Z,11Z)/0:0)	0.70972106	4.691573004	1.860468508	0.081384502	0.13885528	-5.601499787	non
PE(16:1(9Z)/P-16:0)	-0.350761744	6.400415856	-2.009979356	0.061684758	0.111714471	-5.607419177	non
Ketorolac	1.25840505	6.937215847	2.021399548	0.060373658	0.110272932	-5.607802432	non
PC(P-16:0/P-16:0)	0.717401988	3.66830861	1.669222893	0.114606367	0.182362974	-5.612093525	non
Gemcitabine	0.32007529	6.235439782	1.999408621	0.062921287	0.113251262	-5.614292432	non
7-hydroxyoct-7-enoylglycine	0.446724427	6.42292797	2.006425377	0.062098011	0.112209743	-5.61695687	non
Epipregnanolone	1.334727921	7.265243293	2.019300845	0.060612687	0.110520918	-5.622208261	non
PC(P-18:1(11Z)/20:5(5Z,8Z,11Z,14Z,17Z))	0.570074598	6.764945677	2.01533304	0.061066943	0.111159838	-5.622715127	non
SM(d17:1/24:1(15Z))	-0.402899525	4.16654579	-1.762004452	0.097245851	0.160131502	-5.630649578	non
PC(P-18:1(11Z)/20:4(8Z,11Z,14Z,17Z))	0.312835971	6.04864144	1.97832164	0.065455221	0.116829747	-5.633009628	non
Lacto-N-tetraose	-0.223289244	6.173579007	-1.982608273	0.064932767	0.116026218	-5.635301218	non
Bismuth	0.186501275	5.66081497	1.944674195	0.069689719	0.12275024	-5.636113773	non
PC(14:1(9Z)/22:0)	-0.217696688	3.837051107	-1.695216983	0.109490823	0.175261732	-5.637174692	non
Methohexital	0.157137184	7.264095148	2.012784531	0.061360338	0.111473793	-5.640286179	non
Butabarbital	0.198175847	7.220547697	2.012637294	0.061377327	0.111473793	-5.640439344	non
DG(20:0/18:2(9Z,12Z)/0:0)	0.557670771	7.267675569	2.01202768	0.061447715	0.111473793	-5.641037266	non
Aciclovir	0.131050461	7.3037095	2.01230306	0.06141591	0.111473793	-5.64116753	non
Propranolol	0.326097111	7.909692009	2.010807241	0.061588851	0.111617617	-5.645914006	non
PE(24:0/14:1(9Z))	0.202214108	8.191360022	2.013914176	0.061230131	0.11139374	-5.646654982	non
Cer(d18:1/16:0)	0.224439697	7.696451496	2.007918716	0.061924062	0.112021501	-5.648868583	non
Homogentisic acid	0.45664456	7.721096404	2.00655637	0.062082735	0.112209743	-5.651600626	non
PI(18:0/22:5(7Z,10Z,13Z,16Z,19Z))	-0.452727285	8.88630192	-2.010741019	0.061596518	0.111617617	-5.659116803	non
PI(18:1(11Z)/18:2(9Z,12Z))	0.200980085	7.60597018	2.001614326	0.062661432	0.112846808	-5.65928812	non
gamma-Glutamylglutamic acid	-0.564839344	4.121388409	-1.723245672	0.104197652	0.168501373	-5.66663222	non
PC(22:4(7Z,10Z,13Z,16Z)/18:0)	-0.192887429	4.6532029	-1.81662944	0.088139456	0.148098269	-5.666811394	non
PC(22:1(13Z)/14:1(9Z))	0.18787708	10.54103684	2.028408519	0.05958157	0.109136577	-5.666832258	non
PC(P-18:0/22:6(4Z,7Z,10Z,13Z,16Z,19Z))	0.968646952	1.559696872	1.105411926	0.285399331	0.376352055	-5.667026029	non
PG(16:1(9Z)/20:4(5Z,8Z,11Z,14Z))	-0.799117407	2.963957973	-1.44090445	0.168981325	0.246523868	-5.667609566	non
gamma-Glutamylleucine	0.319207295	5.35636889	1.892704299	0.076715077	0.132793592	-5.667679385	non
DG(18:3(9Z,12Z,15Z)/16:0/0:0)	0.129222895	7.161345039	1.995170903	0.063423273	0.114090829	-5.669740096	non
DG(24:1(15Z)/14:1(9Z)/0:0)	0.464483654	2.252432068	1.275925611	0.2202752	0.305530742	-5.67197241	non
PC(P-18:1(9Z)/16:0)	0.891438281	1.019055833	0.966319793	0.348328364	0.443314457	-5.672368069	non
CE(20:2(6Z,9Z))	-0.262605328	6.14137909	-1.95691442	0.068121559	0.12058342	-5.674714134	non
Trihexosylceramide (d18:1/22:0)	0.2605473	5.395845971	1.889830103	0.077121486	0.13306668	-5.679553159	non
PC(20:3(5Z,8Z,11Z)/P-16:0)	0.301941391	9.297535293	1.994666747	0.063483234	0.114134751	-5.685352074	non
PC(16:0/22:5(7Z,10Z,13Z,16Z,19Z))	-0.454718576	4.629340479	-1.79619311	0.091454407	0.152721967	-5.688002076	non
Prolylglycine	0.684166434	1.12364716	0.978467606	0.34247179	0.438467671	-5.689250309	non
Dimethylguanidino valeric acid	0.602484563	6.383795109	1.959467575	0.067798493	0.120144019	-5.692347467	non
PC(20:3(8Z,11Z,14Z)/20:3(5Z,8Z,11Z))	0.13119291	6.638921565	1.970147701	0.066461992	0.11816692	-5.693601115	non
PC(18:3(9Z,12Z,15Z)/18:0)	-0.307759251	4.342384648	-1.754323347	0.098590395	0.161764823	-5.693693009	non
PC(14:1(9Z)/22:4(7Z,10Z,13Z,16Z))	0.219707557	6.107274668	1.944874166	0.069663841	0.12275024	-5.694928326	non
Vaccenic acid	0.263589369	4.996753996	1.835012042	0.085248777	0.144222245	-5.699016449	non
4-Hydroxyretinoic acid	-0.165128141	13.4298136	-2.087713851	0.053248611	0.099292271	-5.70332897	non
6-(3-carboxyphenoxy)-3,4,5-trihydroxyoxane-2-carboxylic acid	0.27799493	5.393234115	1.874814776	0.079276033	0.136053096	-5.703521461	non
Nizatidine	-0.563743532	2.834687791	-1.386961386	0.184558216	0.264442852	-5.704125676	non
PC(14:1(9Z)/14:0)	0.336899332	6.998608685	1.972707536	0.066145208	0.117668844	-5.705024649	non
N6-Acetyl-L-lysine	-0.175729897	9.149721193	-1.983306234	0.064848057	0.115939371	-5.705144106	non
Astaxanthin	0.61968578	9.57432783	1.9840526	0.064757583	0.115842116	-5.707074833	non
Naringenin	0.298847852	6.179086704	1.941217052	0.070138474	0.123270192	-5.707251341	non
PG(18:2(9Z,12Z)/20:3(8Z,11Z,14Z))	1.624031132	2.275789392	1.221915537	0.239515843	0.32657553	-5.711999975	non
PC(20:2(11Z,14Z)/20:0)	-0.273788404	4.975727777	-1.822950953	0.087135762	0.146718895	-5.713477339	non
Spironolactone	0.338482113	6.358728278	1.944698353	0.069686592	0.12275024	-5.715991493	non
PI(20:3(5Z,8Z,11Z)/18:2(9Z,12Z))	1.234759992	3.58291843	1.552188498	0.140258516	0.212338564	-5.718018528	non
Tirofiban	0.437279045	4.09828477	1.69797228	0.108960355	0.174499601	-5.724065361	non
PI(20:4(8Z,11Z,14Z,17Z)/20:1(11Z))	-0.641154216	7.361787621	-1.961386515	0.067556588	0.119834914	-5.725250789	non
PC(22:4(7Z,10Z,13Z,16Z)/14:1(9Z))	0.19905899	5.437276641	1.865325931	0.080665087	0.137883684	-5.726936149	non
PC(18:3(9Z,12Z,15Z)/18:1(9Z))	0.206881379	7.793540359	1.961430802	0.067551014	0.119834914	-5.727743484	non
PIP(16:2(9Z,12Z)/16:0)	0.164534154	8.073486238	1.962644613	0.067398412	0.119699282	-5.730063922	non
Guanidinosuccinic acid	0.231470222	6.349214894	1.935527576	0.070882656	0.124247731	-5.730601686	non
2,3-Diphosphoglyceric acid	0.233164883	4.462623131	1.751784765	0.099038325	0.162251051	-5.734996655	non
Thyroxine	-0.530366412	6.559067267	-1.937694144	0.070598437	0.123942909	-5.737499008	non
gamma-Glutamylisoleucine	-1.264395267	5.691569269	-1.861008278	0.081304278	0.138792152	-5.744034792	non
PC(22:5(7Z,10Z,13Z,16Z,19Z)/14:1(9Z))	1.417743911	3.587517147	1.52371853	0.147186187	0.220211321	-5.747558518	non
TG(18:1(9Z)/18:1(9Z)/20:0)	-0.697047599	4.278232032	-1.691485785	0.110212744	0.176241594	-5.749322876	non
MG(0:0/18:1(11Z)/0:0)	0.364444043	5.804048829	1.88835971	0.07733014	0.133355037	-5.751219901	non
TG(18:0/18:0/20:1(11Z))	-0.501377362	3.211520053	-1.448680545	0.16682751	0.24415822	-5.752318768	non
PE(22:1(13Z)/18:3(6Z,9Z,12Z))	-0.948370428	4.687574245	-1.748803426	0.09956665	0.162867301	-5.75440689	non
PC(18:1(9Z)/P-18:0)	0.41160929	7.722259205	1.945031747	0.069643454	0.12275024	-5.754911771	non
MG(0:0/20:3(8Z,11Z,14Z)/0:0)	0.696224591	6.873860186	1.937127334	0.070672694	0.124005476	-5.757239836	non
Gestrinone	0.343941839	8.004217729	1.944026124	0.069773645	0.122830687	-5.759805646	non
Testosterone glucuronide	0.38523238	1.424108269	0.983547538	0.340043283	0.435532102	-5.762413093	non
NADP	-0.559733259	6.341755999	-1.911233786	0.074140652	0.128823394	-5.765069478	non
Hydroxyzileuton	0.488546795	5.757854593	1.873417155	0.079479282	0.136329045	-5.767139696	non
Paraxanthine	0.123737019	7.092833943	1.935485786	0.070888148	0.124247731	-5.769027745	non
PC(18:3(9Z,12Z,15Z)/18:2(9Z,12Z))	-0.335206294	7.32152214	-1.933728103	0.071119498	0.12447696	-5.772270662	non
PE(P-18:0/20:1(11Z))	0.454938053	6.779012588	1.927157238	0.071990386	0.125699364	-5.772272742	non
DG(20:1(11Z)/18:2(9Z,12Z)/0:0)	0.45630409	7.334029361	1.933608772	0.071135229	0.12447696	-5.773184505	non
PE(20:1(11Z)/18:0)	1.038537061	4.558088098	1.726549594	0.103588617	0.167966639	-5.773770559	non
DG(20:1(11Z)/14:1(9Z)/0:0)	-0.22871269	9.076930857	-1.940384159	0.070246976	0.123393348	-5.777308352	non
PI(20:0/20:3(8Z,11Z,14Z))	0.320124956	5.551219362	1.842867068	0.084039385	0.142401301	-5.783380042	non
7-hydroxyoct-6-enoylglycine	0.164351134	7.209514191	1.926386605	0.072093149	0.125810381	-5.78507545	non
Gold	-0.404945452	1.825751334	-1.062171794	0.30399787	0.396481381	-5.785644021	non
Estrone	0.279372335	6.078536624	1.886310028	0.077621838	0.133642747	-5.788557772	non
Nevirapine	0.493128095	4.21906325	1.673651446	0.113720533	0.181309151	-5.792887652	non
PC(P-18:1(11Z)/18:0)	0.659265684	8.606756872	1.928660465	0.071790312	0.125486495	-5.796393826	non
(13Z,13'Z,3R,3'R,6'R)-Lutein	-0.354034148	5.172919773	-1.790415867	0.092411224	0.153747379	-5.798820566	non
Glucosamine	0.153314294	6.634078758	1.904966422	0.075002636	0.130004372	-5.801562311	non
Chlordiazepoxide	-0.645999854	4.685398131	-1.722673271	0.104303482	0.168554847	-5.807629414	non
TG(16:0/18:2(9Z,12Z)/18:2(9Z,12Z))	-0.253881909	7.199698533	-1.91135548	0.074124003	0.128823394	-5.808438805	non
Estrone glucuronide	0.590736151	10.03507816	1.931070449	0.071470592	0.124995682	-5.808621148	non
4-Hydroxyestrone	0.17387653	7.241493498	1.910027337	0.074305889	0.129040675	-5.812171527	non
PE(18:0/15:0)	1.109600576	1.659367761	0.9778971	0.342745283	0.438468169	-5.817035909	non
Cer(d18:0/25:0)	-0.639710279	6.539863995	-1.886824282	0.077548561	0.133616887	-5.818370108	non
5-octenoylglycine	0.341400872	8.419951568	1.914852193	0.073647041	0.128173793	-5.818394151	non
PI(18:2(9Z,12Z)/18:2(9Z,12Z))	-0.516473065	4.933598689	-1.74757464	0.099785119	0.163141557	-5.82171103	non
DG(18:0/18:3(6Z,9Z,12Z)/0:0)	-0.759134705	3.547987231	-1.472803773	0.160289439	0.23609605	-5.823766625	non
PC(22:0/20:5(5Z,8Z,11Z,14Z,17Z))	0.3076372	5.194611471	1.776330514	0.094781009	0.157120196	-5.825419422	non
Androsterone	1.788865017	3.046009212	1.307644613	0.209554519	0.29306601	-5.831343111	non
N6,N6,N6-Trimethyl-L-lysine	0.132544015	7.097233423	1.896073259	0.076241145	0.1320444	-5.834094686	non
Folic acid	-0.373618663	6.774287836	-1.883102119	0.078080339	0.134360112	-5.841050351	non
DG(18:3(9Z,12Z,15Z)/18:3(9Z,12Z,15Z)/0:0)	-1.083485259	4.09843481	-1.5652536	0.137172503	0.208749245	-5.842128754	non
PG(18:1(9Z)/20:4(5Z,8Z,11Z,14Z))	2.092927444	2.507100404	1.14246401	0.270144638	0.361095902	-5.844338115	non
Cer(t18:0/16:0)	0.500285527	0.28844927	0.459935808	0.651778255	0.731513449	-5.858885691	non
2,5-Furandicarboxylic acid	-0.286349581	6.61231435	-1.867038147	0.080412849	0.137709684	-5.85973128	non
PI(16:0/20:4(8Z,11Z,14Z,17Z))	0.191795564	7.450829368	1.880673517	0.07842906	0.134823449	-5.860291565	non
PC(20:2(11Z,14Z)/22:4(7Z,10Z,13Z,16Z))	1.609237834	1.279615445	0.783137492	0.445035385	0.541906948	-5.869638028	non
Tripelennamine	0.281383974	7.51350751	1.871834806	0.079709954	0.136651714	-5.874676418	non
Famciclovir	-1.387408405	5.91802155	-1.794650325	0.091709063	0.152896054	-5.874691721	non
Trimethylsilyl heptadecanoic acid	-0.178258737	8.246074021	-1.876311809	0.079058842	0.135825544	-5.877159732	non
Difucosyllacto-N-hexaose a	-0.510258397	3.87010356	-1.525183298	0.146822884	0.219891923	-5.87833588	non
Lithocholate 3-O-glucuronide	0.496807946	4.538470129	1.666239751	0.115206427	0.182995488	-5.878529084	non
PI(22:2(13Z,16Z)/18:2(9Z,12Z))	0.462837267	10.09198561	1.886707426	0.077565206	0.133616887	-5.883607636	non
Cer(d18:0/26:0)	0.763420876	5.472376677	1.768141281	0.096183195	0.158952259	-5.884586093	non
D-Ribose 5-phosphate	0.183574627	7.34161054	1.865784583	0.080597451	0.137878751	-5.884606577	non
Trihexosylceramide (d18:1/20:0)	0.545632132	6.690984947	1.855057408	0.082192632	0.140000185	-5.884927153	non
PG(18:1(11Z)/22:5(7Z,10Z,13Z,16Z,19Z))	0.779815926	3.359709439	1.390437275	0.183520483	0.263898017	-5.886652534	non
Prostaglandin A2	0.216494789	6.494908799	1.846405485	0.083499584	0.141710974	-5.887429098	non
N-a-Acetyl-L-arginine	0.617661045	5.723577679	1.792320203	0.092094862	0.153459576	-5.889508115	non
PE(20:1(11Z)/20:4(8Z,11Z,14Z,17Z))	0.559538982	1.224791419	0.766990207	0.454306694	0.550898337	-5.894288595	non
Cetrorelix	0.145110491	11.39514088	1.91686354	0.073373935	0.127837061	-5.895190788	non
PC(P-18:0/14:1(9Z))	0.747786198	1.228232134	0.763558736	0.456292233	0.552888437	-5.895403169	non
Phenylglyoxylic acid	-0.311593754	8.471532643	-1.86616921	0.08054077	0.137855231	-5.896957955	non
Nisoldipine	-0.20875645	7.723842979	-1.854808721	0.082229944	0.140000185	-5.903477099	non
PC(24:0/14:1(9Z))	0.193008106	7.293446268	1.853039618	0.082495803	0.140304037	-5.905206628	non
PE(P-18:1(11Z)/18:1(9Z))	0.18525287	7.13578572	1.852086118	0.08263941	0.140473873	-5.906103362	non
[truncated: 1,212 more rows]
