# Supplementary material for: Flos Carthami Exerts Hepatoprotective Action in a Rat Model of Alcoholic Liver Injury via Modulating the Metabolomics Profile
Source: Evid Based Complement Alternat Med. 2022 May 2;2022:8158699. doi: 10.1155/2022/8158699 (PMC9085312; doi:10.1155/2022/8158699)
Supplement: Supplementary Materials — Additional Figure S1. Enrichment analysis of metabolites differentially expressed between the CG and MG. Additional Figure S2. Enrichment analysis of metabolites differentially expressed between the FC and MG. Additional Figure S3. Metabolite interaction network of FC-responsive metabolites in alcoholic liver injury. Additional File S1. List of ingredients in FC as reported in TCMSP. Additional File S2. List of metabolites differentially expressed between the CG and MG. Additional File S3. List of metabolites differentially expressed between the FC and MG. Additional File S4. List of FC-responsive metabolites in alcoholic liver injury. Additional File S5. Pearson correlation of FC-responsive metabolites in alcoholic liver injury. [file 8158699.f1.zip › 8158699.f1/Additional File S3 (1).txt]

	logFC	AveExpr	t	P.Value	adj.P.Val	B	threshold
Bendroflumethiazide	-3.642668213	3.624283681	-14.34724434	1.53E-10	4.92E-07	12.85457324	down
Terconazole	-1.204101936	6.011964176	-9.438074043	6.22E-08	6.36E-05	8.570270087	down
5C-aglycone	-1.329824982	6.801339783	-9.271960839	7.93E-08	6.36E-05	8.299572472	down
Malonylcarnitine	-1.685449228	5.010948852	-8.77347331	1.67E-07	8.04E-05	7.635680232	down
3,4-Dihydroxyphenylglycol O-sulfate	-1.006944594	5.130577068	-8.741724517	1.75E-07	8.04E-05	7.567568124	down
PC(22:1(13Z)/20:4(5Z,8Z,11Z,14Z))	0.79590548	7.403292442	8.743559544	1.75E-07	8.04E-05	7.478691612	up
5'-Hydroxypiroxicam	1.27190613	6.584918051	8.639813802	2.05E-07	8.23E-05	7.337507589	up
PC(22:0/20:0)	1.011700236	4.791760365	8.377271542	3.08E-07	0.000102126	7.022160582	up
Ceftazidime	-4.697420699	2.127349882	-9.681778239	4.38E-08	6.36E-05	6.894529044	down
5-Hydroxyfluvastatin	1.113708447	6.612458433	8.357609339	3.18E-07	0.000102126	6.888122714	up
TG(16:1(9Z)/20:0/20:0)	-1.414596769	7.628022774	-8.201622566	4.07E-07	0.000118861	6.619306159	down
Oxyphenonium	-2.3987661	5.301767636	-7.881762403	6.82E-07	0.000168518	6.227605548	down
4-oxo-Retinoic acid	-2.265686375	3.158422374	-7.89674165	6.66E-07	0.000168518	6.158448967	down
Neolactotetraose	-1.480656618	6.845792169	-7.356428668	1.64E-06	0.000373324	5.220453628	down
N-Deisopropyl-fluvastatin	1.29475805	5.187406975	7.282206896	1.86E-06	0.000373324	5.186107505	up
Moxifloxacin	-2.230931936	7.745923341	-7.285118781	1.85E-06	0.000373324	5.080219347	down
Hydroxytyrosol	-1.93939857	2.877418516	-6.946876622	3.33E-06	0.000593768	4.666419322	down
Tadalafil	-1.913472314	7.011886903	-6.885129219	3.71E-06	0.000608446	4.38997615	down
Ubiquinone-1	-1.946993151	6.411869852	-6.845683271	3.98E-06	0.000608446	4.347752212	down
PC(20:3(8Z,11Z,14Z)/P-16:0)	0.578704175	8.949409011	6.872944142	3.79E-06	0.000608446	4.338295796	up
PC(24:0/18:0)	0.687447902	4.918667393	6.759991944	4.63E-06	0.000676339	4.282911387	up
Argininic acid	-0.901716491	7.8868953	-6.65405036	5.60E-06	0.000782057	3.940014801	down
Phytofluene	-2.033021833	2.68357259	-6.421428367	8.54E-06	0.001140988	3.770694456	down
3-Fucosyllactose	1.590527379	2.725478986	6.400017276	8.88E-06	0.001140988	3.769798793	up
Ertapenem	4.340262206	1.508595162	6.9595287	3.26E-06	0.000593768	3.72239506	up
DG(18:2(9Z,12Z)/20:3(8Z,11Z,14Z)/0:0)	-1.124370599	2.966893804	-6.297882369	1.07E-05	0.001185171	3.628173993	down
Terephthalic acid	0.743469632	3.681411499	6.286320615	1.10E-05	0.001185171	3.582732287	up
PC(22:0/P-18:1(11Z))	0.743393011	3.67828089	6.245469267	1.18E-05	0.001185171	3.508883089	up
Thiabendazole	-1.87262293	4.679760824	-6.266323069	1.14E-05	0.001185171	3.463266283	down
3-Methoxymorphinan	1.310028784	4.380895679	6.251653948	1.17E-05	0.001185171	3.441869417	up
PC(20:3(8Z,11Z,14Z)/P-18:1(9Z))	0.664495949	5.167472888	6.269447908	1.13E-05	0.001185171	3.35876135	up
PC(20:0/18:1(11Z))	0.445101584	10.64380367	6.358554481	9.59E-06	0.001183853	3.357543995	non
PC(24:0/16:1(9Z))	0.683767741	3.588610598	6.090326929	1.58E-05	0.001406826	3.235209175	up
GlcCer(d18:1/16:0)	-1.275166738	8.911148165	-6.205609779	1.27E-05	0.001237523	3.102081898	down
PC(18:1(11Z)/18:2(9Z,12Z))	-1.307348078	3.896186804	-6.007531403	1.84E-05	0.001599409	3.069480007	down
Cer(d18:1/20:0)	-1.139994881	8.768568197	-6.176147155	1.34E-05	0.001268829	3.047475317	down
2-Methoxy-estradiol-17b 3-glucuronide	-1.512437183	3.936235463	-5.932004581	2.13E-05	0.001796433	2.933058335	down
beta-Glycerophosphoric acid	-1.639837508	8.330571842	-6.115607421	1.50E-05	0.001380096	2.931056501	down
Deoxyadenosine triphosphate	1.385839615	2.874882397	5.80518095	2.71E-05	0.002201841	2.755062294	up
PC(24:0/18:2(9Z,12Z))	0.854492465	3.182476065	5.79827935	2.74E-05	0.002201841	2.738156419	up
TG(22:6(4Z,7Z,10Z,13Z,16Z,19Z)/18:0/22:6(4Z,7Z,10Z,13Z,16Z,19Z))	-0.619683583	4.137693432	-5.716883012	3.21E-05	0.002511431	2.448846195	down
Ibuprofen	-0.730102368	6.961950182	-5.566960772	4.29E-05	0.003276697	1.876260804	down
PC(22:1(13Z)/18:4(6Z,9Z,12Z,15Z))	0.491785544	7.551339174	5.533856041	4.57E-05	0.003413553	1.799574137	non
5-Hydroxyketamine	-2.455810578	6.355483393	-5.443204489	5.46E-05	0.003982725	1.707382871	down
DG(18:3(6Z,9Z,12Z)/18:2(9Z,12Z)/0:0)	-1.001759668	4.130272168	-5.314505124	7.03E-05	0.004668769	1.687814691	down
DG(20:4(8Z,11Z,14Z,17Z)/18:1(11Z)/0:0)	0.660287423	4.696794406	5.365065915	6.36E-05	0.004441959	1.666019391	up
PC(18:1(9Z)/22:5(4Z,7Z,10Z,13Z,16Z))	0.267863213	9.538405376	5.381466843	6.16E-05	0.00439635	1.491897982	non
PE(18:1(9Z)/18:0)	-1.400659584	5.297105009	-5.291249997	7.36E-05	0.004668769	1.463907575	down
TG(16:1(9Z)/18:2(9Z,12Z)/18:2(9Z,12Z))	-1.234662036	5.95134776	-5.297154808	7.28E-05	0.004668769	1.410643213	down
PC(22:4(7Z,10Z,13Z,16Z)/14:1(9Z))	0.615023589	5.678310541	5.287614924	7.42E-05	0.004668769	1.403689135	up
Tacrine	-0.801997707	7.157738208	-5.325362118	6.88E-05	0.004668769	1.391069676	down
3-Hydroxyomeprazole	-2.352029434	6.66571201	-5.268541628	7.70E-05	0.004755327	1.335155625	down
Methotrexate	-2.608411742	2.953000641	-5.007662069	0.000129694	0.006506976	1.2876288	down
PC(20:2(11Z,14Z)/16:0)	-1.420897534	6.66846451	-5.243532089	8.09E-05	0.004902936	1.255685961	down
gamma-Glutamylalanine	-0.879264129	4.737267526	-5.137299081	1.00E-04	0.005536072	1.219981943	down
Hexachlorophene	-1.147758829	3.998778156	-5.055947885	0.000117695	0.006195372	1.211487111	down
PC(16:1(9Z)/20:3(8Z,11Z,14Z))	1.056058788	5.908720198	5.195920013	8.90E-05	0.00519378	1.203550691	up
Ganglioside GM3 (d18:1/26:1(17Z)))	-1.233966961	5.208057492	-5.157971169	9.60E-05	0.005405379	1.20236978	down
Syringic acid	-1.044231399	6.301893951	-5.204631805	8.74E-05	0.00519378	1.190202433	down
PE(18:1(11Z)/18:1(11Z))	0.650955724	4.287350566	5.084466428	0.00011115	0.005948388	1.172585816	up
PC(22:1(13Z)/P-18:1(9Z))	0.492295025	6.660808219	5.162253217	9.51E-05	0.005405379	1.073251253	non
PC(18:3(9Z,12Z,15Z)/14:1(9Z))	0.803549917	4.387896562	5.026982905	0.000124748	0.0063582	1.044733367	up
DG(16:0/18:4(6Z,9Z,12Z,15Z)/0:0)	-0.501836532	5.974594297	-5.121572201	0.000103191	0.005616065	1.041617885	down
PI(20:2(11Z,14Z)/16:0)	0.423198688	4.048940613	4.950734547	0.00014547	0.007077356	0.94643131	non
Dapsone	-1.021443042	5.558577903	-5.037087355	0.00012224	0.006330823	0.918141181	down
PC(22:2(13Z,16Z)/20:3(8Z,11Z,14Z))	0.624993928	4.480653386	4.914616202	0.000156491	0.007499867	0.794227596	up
Raffinose	-0.661867136	4.472805481	-4.906082627	0.000159217	0.007518332	0.788637043	down
GlcCer(d18:1/12:0)	0.40354888	7.992391237	4.973672229	0.000138889	0.006861107	0.673577813	non
PE(14:1(9Z)/22:0)	0.526415171	3.990594977	4.804196926	0.000195805	0.008732374	0.666567903	up
PC(18:1(11Z)/18:3(9Z,12Z,15Z))	1.747525118	2.792461798	4.650376667	0.000268128	0.010898221	0.604165347	up
Elaidic carnitine	-0.858288521	4.467533963	-4.789814209	0.000201625	0.008868746	0.564345462	down
DG(14:0/16:1(9Z)/0:0)	-0.713676803	6.419516842	-4.886649316	0.00016561	0.007706876	0.530210665	down
PC(14:0/24:0)	0.344983285	5.251094945	4.808371146	0.000194149	0.008732374	0.478407615	non
Oxyphencyclimine	-0.681867023	7.798287927	-4.825846836	0.000187368	0.008594829	0.368303598	down
PG(18:3(6Z,9Z,12Z)/20:3(5Z,8Z,11Z))	1.709663804	4.857025347	4.70570553	0.000239396	0.010249356	0.353126193	up
PI(18:0/22:4(7Z,10Z,13Z,16Z))	0.461836796	7.240748784	4.705866587	0.000239317	0.010249356	0.119981898	non
all-trans-Phytofluene	0.600079451	4.375178663	4.574949407	0.00031308	0.012112066	0.119529026	up
PC(20:3(8Z,11Z,14Z)/14:1(9Z))	0.540367971	6.139059753	4.672028327	0.000256486	0.010558676	0.105957841	up
Testosterone sulfate	-0.986520373	8.903954381	-4.690926666	0.000246748	0.010425089	0.08856318	down
PE(20:3(5Z,8Z,11Z)/18:0)	0.35141183	10.74086044	4.680577653	0.000252033	0.010510092	0.024904262	non
3'-Sialyl-3-fucosyllactose	-1.122555537	5.369222882	-4.577088531	0.000311705	0.012112066	-0.0045499	down
PE(18:1(11Z)/P-18:1(9Z))	-0.772539537	6.24704569	-4.592118218	0.000302213	0.012112066	-0.063730414	down
PI(20:4(5Z,8Z,11Z,14Z)/18:0)	-0.533983602	5.584567755	-4.551579229	0.000328518	0.01234353	-0.086336417	down
DG(20:3(8Z,11Z,14Z)/20:4(5Z,8Z,11Z,14Z)/0:0)	-0.51197066	3.450644264	-4.364827541	0.000483448	0.016340548	-0.0889703	down
DG(20:5(5Z,8Z,11Z,14Z,17Z)/18:0/0:0)	0.550242478	7.143764652	4.582563263	0.000308213	0.012112066	-0.133459509	up
LacCer(d18:1/12:0)	-0.898750267	6.625764917	-4.561739099	0.000321713	0.01229788	-0.149608997	down
PC(20:4(5Z,8Z,11Z,14Z)/22:0)	0.573945022	6.529689838	4.548519818	0.000330596	0.01234353	-0.178061605	up
PC(18:2(9Z,12Z)/20:1(11Z))	-0.822087787	4.404401225	-4.407058619	0.000442889	0.015627649	-0.209479512	down
Pipobroman	0.350986822	5.015219908	4.459081613	0.000397652	0.014463946	-0.215307359	non
3-Hydroxyanthranilic acid	-0.645214488	5.074117386	-4.449750456	0.000405405	0.014463946	-0.239779109	down
17a-Ethynylestradiol	-0.507280095	5.439420519	-4.468433654	0.000390034	0.014395397	-0.243306983	down
Nateglinide	-0.522205743	4.925216089	-4.397366774	0.00045188	0.015771578	-0.329954922	down
PC(20:5(5Z,8Z,11Z,14Z,17Z)/18:0)	-1.421696462	4.095451013	-4.259636556	0.000601728	0.018942647	-0.398999253	down
Petroselinic acid	-0.974368271	9.090407993	-4.450451496	0.000404817	0.014463946	-0.412719005	down
PC(18:1(11Z)/18:3(6Z,9Z,12Z))	-1.887148961	4.609605709	-4.268500983	0.000590714	0.01878001	-0.457745802	down
PC(22:4(7Z,10Z,13Z,16Z)/14:0)	-1.296770679	5.813645559	-4.367878851	0.000480395	0.016340548	-0.478309301	down
13-cis-Retinoic acid	-1.503499991	4.582945784	-4.272607473	0.00058568	0.01878001	-0.479604857	down
Diethyl phthalic acid	0.378121314	9.19816602	4.383573068	0.000464997	0.016054901	-0.55079545	non
D-Xylitol	0.642315793	4.265025015	4.221619739	0.000651386	0.019729916	-0.584812423	up
DG(18:1(11Z)/20:0/0:0)	0.561578553	10.04789693	4.357505238	0.000490856	0.016418124	-0.620521054	up
Epinastine	-0.848855883	5.983008341	-4.310027174	0.000541779	0.017751568	-0.625116283	down
Glimepiride	-0.752259059	4.847637802	-4.238640883	0.000628658	0.019409814	-0.643578338	down
PC(18:2(9Z,12Z)/20:3(5Z,8Z,11Z))	-0.625653354	7.207156037	-4.328866766	0.000520959	0.017245341	-0.659711264	down
PC(P-18:1(9Z)/20:2(11Z,14Z))	0.481914874	4.435100233	4.199618264	0.000682007	0.019729916	-0.671189417	non
PG(18:2(9Z,12Z)/22:6(4Z,7Z,10Z,13Z,16Z,19Z))	-0.381011754	3.477166031	-4.072822094	0.000889244	0.022959683	-0.693336198	non
DG(16:0/20:2(11Z,14Z)/0:0)	-0.48321468	4.138701382	-4.145737185	0.000763315	0.021129349	-0.710958973	non
Sertraline	-0.994456897	4.327292224	-4.147267885	0.000760875	0.021129349	-0.718899112	down
PE(20:0/P-18:1(9Z))	-0.852670627	4.435760944	-4.151029404	0.000754911	0.021129349	-0.744364018	down
Vancomycin	1.348007625	4.238064855	4.116550674	0.000811397	0.021894069	-0.750394116	up
DG(20:4(5Z,8Z,11Z,14Z)/18:1(11Z)/0:0)	-0.509661832	4.223455305	-4.134772146	0.00078103	0.021434946	-0.751844287	down
DG(22:1(13Z)/14:0/0:0)	0.535602087	4.086795897	4.122714516	0.000800993	0.021796507	-0.751927006	up
PI(20:3(5Z,8Z,11Z)/18:0)	0.501830972	10.83961665	4.304308336	0.000548266	0.017782638	-0.764065609	up
PC(22:2(13Z,16Z)/P-18:0)	0.757585924	5.155145839	4.200135718	0.00068127	0.019729916	-0.769313635	up
PC(24:0/18:4(6Z,9Z,12Z,15Z))	-0.313315326	5.50094867	-4.217172802	0.000657461	0.019729916	-0.774706215	non
DG(20:3(8Z,11Z,14Z)/14:1(9Z)/0:0)	-0.594642801	6.284243563	-4.24257653	0.000623518	0.019409814	-0.797084986	down
PC(20:5(5Z,8Z,11Z,14Z,17Z)/P-18:1(9Z))	0.300221602	6.183172961	4.199597077	0.000682037	0.019729916	-0.88183348	non
TG(16:0/18:1(9Z)/18:1(9Z))	-2.473614102	5.842195289	-4.152554058	0.000752507	0.021129349	-0.893983017	down
Nicotine-1'-N-oxide	-0.783009685	7.960797131	-4.210172106	0.00066714	0.019729916	-0.912252472	down
PC(16:1(9Z)/16:0)	0.35110814	4.584250616	4.097506739	0.000844413	0.022416779	-0.912407965	non
DG(14:0/18:1(9Z)/0:0)	-0.981544217	4.482651566	-4.070389847	0.00089379	0.022959683	-0.913203035	down
TG(18:2(9Z,12Z)/18:2(9Z,12Z)/18:2(9Z,12Z))	0.412652188	10.01466779	4.205692205	0.00067341	0.019729916	-0.936832932	non
CE(14:0)	-0.507517092	5.762271103	-4.14978446	0.00075688	0.021129349	-0.942741002	down
Cer(d18:1/22:0)	-0.529842212	4.067043201	-4.011121272	0.001012136	0.024999754	-0.970042316	down
PC(14:0/22:6(4Z,7Z,10Z,13Z,16Z,19Z))	0.712815995	3.926952974	3.980859986	0.001078552	0.025845005	-0.997413777	up
CE(18:1(11Z))	0.605692329	4.445398949	4.026083695	0.00098084	0.024605292	-1.029310574	up
DG(18:0/20:3(5Z,8Z,11Z)/0:0)	-0.619445999	5.197897152	-4.074011326	0.00088703	0.022959683	-1.037374058	down
DG(18:3(6Z,9Z,12Z)/16:0/0:0)	0.51292253	4.535575805	4.017414234	0.000998852	0.024862899	-1.067343565	up
TG(16:0/16:1(9Z)/18:1(9Z))	-0.683692749	6.044585422	-4.063966492	0.000905909	0.023086292	-1.14897542	down
Theaflavin	-0.633110326	4.055271757	-3.910308768	0.001251015	0.02848942	-1.170050621	down
PE(22:5(7Z,10Z,13Z,16Z,19Z)/P-18:0)	0.413499379	10.01485843	4.093544754	0.000851452	0.022416779	-1.172127959	non
DG(20:3(5Z,8Z,11Z)/18:1(9Z)/0:0)	-0.75390131	8.200350833	-4.049492426	0.000933829	0.023610435	-1.248427591	down
Digoxin	-1.012225495	3.664810039	-3.80787897	0.001552164	0.033210799	-1.253102297	down
PI(18:3(6Z,9Z,12Z)/22:3(10Z,13Z,16Z))	0.43557795	5.407266648	3.981992768	0.001075988	0.025845005	-1.25520072	non
PE(16:0/22:2(13Z,16Z))	-0.759685726	5.571023551	-3.987309173	0.001064038	0.025845005	-1.258216715	down
DG(20:4(5Z,8Z,11Z,14Z)/20:0/0:0)	-0.498047428	3.650709667	-3.817055324	0.001522438	0.032809049	-1.25950384	non
2,6-octadienoylglycine	1.109075409	3.70403219	3.80495254	0.001561766	0.033210799	-1.276390938	up
DG(16:0/20:3(8Z,11Z,14Z)/0:0)	-0.702423697	5.914378704	-3.985695471	0.001067651	0.025845005	-1.299218637	down
4-Hydroxyretinoic acid	-0.19634807	13.43180157	-4.093398879	0.000851712	0.022416779	-1.342017592	non
TG(20:1(11Z)/20:1(11Z)/20:1(11Z))	-0.896698224	6.571640755	-3.970652409	0.001101935	0.026209729	-1.382242588	down
PA(18:1(11Z)/18:1(11Z))	-0.517227755	4.561817194	-3.856935003	0.001399766	0.031212836	-1.398454949	down
DG(20:5(5Z,8Z,11Z,14Z,17Z)/18:1(11Z)/0:0)	0.637758946	3.278950708	3.69169622	0.001983075	0.038129665	-1.415516395	up
PI(18:0/18:3(6Z,9Z,12Z))	0.453617526	5.840856116	3.920786225	0.001223741	0.028269304	-1.434193272	non
Curcumin	0.451158847	5.275341765	3.885853114	0.001317085	0.029782805	-1.439993933	non
21-Hydroxy-5b-pregnane-3,11,20-trione	-0.757874858	6.560977846	-3.937225811	0.001182152	0.027707226	-1.453958227	down
Sedoheptulose	0.2864754	5.889871467	3.913386631	0.00124294	0.02848942	-1.455782767	non
1-hydroxyoct-7-enoylglycine	0.432630249	8.658256601	3.947210974	0.001157591	0.027331056	-1.463895998	non
PC(20:3(8Z,11Z,14Z)/P-18:1(11Z))	0.375262386	4.145000274	3.775997848	0.001660053	0.034763694	-1.489650062	non
Disulfiram	-0.951368415	8.572519316	-3.93038178	0.00119929	0.027905219	-1.498183827	down
Gentian Violet	-0.710748061	3.799650119	-3.684364536	0.002013989	0.038265798	-1.56385215	down
Oleamide	-0.593435853	6.257262084	-3.853485779	0.001409971	0.03122356	-1.610353823	down
PG(18:3(6Z,9Z,12Z)/22:6(4Z,7Z,10Z,13Z,16Z,19Z))	0.350536444	7.161232473	3.875595649	0.001345833	0.030220076	-1.614726862	non
Nicotine glucuronide	-0.490421879	4.441364973	-3.73462417	0.001811388	0.036700986	-1.631400786	non
Quetiapine	-0.525318899	2.941482569	-3.539723084	0.00273291	0.047692254	-1.6367947	down
DG(24:1(15Z)/14:0/0:0)	-0.641781993	5.535993972	-3.798193778	0.001584172	0.03346563	-1.651611588	down
5-Methoxydimethyltryptamine	1.444382754	3.723494379	3.605979871	0.002376268	0.043353386	-1.664604004	up
DG(20:1(11Z)/14:1(9Z)/0:0)	0.558420002	9.482371158	3.850125119	0.001419986	0.031229958	-1.672389992	up
PE(16:0/P-18:1(11Z))	0.501300148	4.221673124	3.688738174	0.00199549	0.038139992	-1.685674659	up
PG(18:3(6Z,9Z,12Z)/22:5(7Z,10Z,13Z,16Z,19Z))	-0.622873355	5.442273347	-3.773939737	0.001667272	0.034763694	-1.692293018	down
Citalopram	-0.801542158	8.004466561	-3.82931649	0.001483611	0.03240732	-1.711540909	down
DG(20:4(8Z,11Z,14Z,17Z)/20:0/0:0)	0.19249094	6.878277362	3.821323764	0.001508807	0.032734987	-1.721146068	non
Vitamin K1 2,3-epoxide	-0.77718383	5.579151113	-3.738639374	0.001796113	0.036700986	-1.779105353	down
PC(22:5(7Z,10Z,13Z,16Z,19Z)/14:0)	0.468140143	4.916573299	3.696597648	0.001962674	0.037964735	-1.791954406	non
Deoxyguanosine	0.412997203	5.390914831	3.703971324	0.001932379	0.037644261	-1.834389063	non
PC(22:1(13Z)/20:3(5Z,8Z,11Z))	0.577904387	4.234920863	3.614647475	0.002333194	0.043056812	-1.839385635	up
PA(18:0/18:2(9Z,12Z))	-0.373941271	8.434361028	-3.747596157	0.001762504	0.036512262	-1.881837166	non
Fenoldopam	0.630380665	2.790829145	3.40015305	0.003668535	0.055827801	-1.882541948	up
DG(16:0/14:1(9Z)/0:0)	-0.4420922	7.070183732	-3.730097932	0.001828763	0.036700986	-1.91517807	non
Mirtazapine	-3.109661313	4.418346374	-3.461876256	0.003220788	0.052683543	-1.928124432	down
PC(18:1(11Z)/22:0)	1.25547267	7.030372121	3.704145719	0.001931668	0.037644261	-1.957495674	up
NADH	-0.37318797	8.135400301	-3.705748382	0.001925148	0.037644261	-1.968740474	non
PE(18:2(9Z,12Z)/18:0)	-0.449006684	4.771242085	-3.600059261	0.002406147	0.043650498	-1.969771946	non
PG(18:0/16:1(9Z))	-0.317961953	5.149821996	-3.624413567	0.002285596	0.042668896	-1.970423938	non
3-Nitrotyrosine	-0.968898355	2.89424675	-3.359688099	0.003995127	0.057785374	-1.973293891	down
Norhydromorphone	-0.478511878	8.922631343	-3.703479945	0.001934383	0.037644261	-1.976127346	non
PC(18:1(9Z)/22:4(7Z,10Z,13Z,16Z))	0.198466078	11.62719523	3.742067894	0.001783173	0.036700986	-1.985265323	non
PI(18:3(9Z,12Z,15Z)/18:0)	1.013327752	5.216351743	3.607157738	0.002370368	0.043353386	-2.013004231	up
Prostaglandin E3	0.812348401	4.280521723	3.529240793	0.00279404	0.048234747	-2.014496198	up
Palmitoleic acid	-0.602994376	11.84465502	-3.731310277	0.001824093	0.036700986	-2.018780743	down
Mesobilirubinogen	-0.720254669	8.25283616	-3.672449553	0.002065264	0.039009186	-2.039316081	down
Ganglioside GM3 (d18:1/24:1(15Z))	-0.477591777	11.9622835	-3.720895016	0.001864609	0.03718794	-2.046903607	non
PC(P-18:1(11Z)/18:2(9Z,12Z))	1.056128054	6.810655115	3.659031488	0.002124575	0.039894792	-2.048181153	up
Enprofylline	-0.727308584	4.680845098	-3.546666169	0.002693157	0.047255342	-2.055527786	down
PE(P-18:1(11Z)/18:1(11Z))	1.088415215	3.178064905	3.348654601	0.004089082	0.058616259	-2.064857618	up
Meprobamate	-3.063092533	4.929936572	-3.456846502	0.003255142	0.052683543	-2.079756397	down
PC(24:0/P-16:0)	0.376446017	4.03086104	3.465733423	0.003194687	0.052683543	-2.1001329	non
PC(P-18:1(11Z)/22:4(7Z,10Z,13Z,16Z))	0.742539373	4.448341746	3.506270272	0.002932813	0.049414041	-2.103366585	up
Trihexosylceramide (d18:1/12:0)	0.460620966	4.800360946	3.533289438	0.002770269	0.048082892	-2.116416409	non
Prolylhydroxyproline	0.536271667	3.609720699	3.3869524	0.003772052	0.056075539	-2.133470313	up
PC(18:4(6Z,9Z,12Z,15Z)/20:0)	0.442332579	5.901805451	3.582681963	0.002496032	0.045026737	-2.147639498	non
Streptozocin	-0.977738059	7.872722447	-3.616123224	0.002325938	0.043056812	-2.158890056	down
PE(20:3(8Z,11Z,14Z)/18:0)	-0.380735298	5.253532702	-3.513649835	0.002887496	0.049056881	-2.213718266	non
N-[(3a,5b,7b)-7-hydroxy-24-oxo-3-(sulfooxy)cholan-24-yl]-Glycine	-0.493557107	8.25799451	-3.573011686	0.002547498	0.045620077	-2.246868972	non
DG(18:1(9Z)/20:2(11Z,14Z)/0:0)	-1.02169368	7.632594843	-3.57118505	0.002557338	0.045620077	-2.250675971	down
PC(20:0/20:2(11Z,14Z))	0.23273337	6.43037808	3.554699159	0.002647884	0.046716237	-2.252055733	non
Cer(d18:0/22:0)	-0.415083191	3.988208697	-3.378730685	0.003837986	0.056272935	-2.258784684	non
3-Methyluridine	-0.578708147	7.030638663	-3.558911494	0.002624448	0.046558582	-2.270302066	down
PC(20:4(5Z,8Z,11Z,14Z)/P-18:0)	0.434561617	5.282053524	3.481125084	0.003092617	0.051452808	-2.28451888	non
Glyceric acid 1,3-biphosphate	0.260473092	4.794039891	3.445664362	0.003332833	0.053242416	-2.299421237	non
PG(18:1(9Z)/18:3(9Z,12Z,15Z))	1.146500374	6.583818182	3.523478496	0.002828224	0.048563779	-2.318423728	up
TG(16:1(9Z)/20:0/20:1(11Z))	-0.701266184	5.227649598	-3.45847467	0.003243982	0.052683543	-2.324206092	down
PE(20:0/P-18:1(11Z))	-1.051517307	3.077118119	-3.201092211	0.005577346	0.07192313	-2.325477854	down
Calcitroic acid	-0.497648515	4.938102927	-3.434726332	0.003410612	0.053683709	-2.335940928	non
CE(22:0)	-0.655560325	7.058813136	-3.515931259	0.002873628	0.049056881	-2.359494475	down
Cysteinylglycine	0.541066962	4.828736427	3.416120129	0.003547092	0.054496231	-2.361618134	up
DG(14:0/20:4(8Z,11Z,14Z,17Z)/0:0)	1.368011273	3.599264908	3.248462901	0.005048967	0.067833614	-2.362323928	up
PC(18:1(11Z)/22:1(13Z))	1.258228396	3.793165313	3.280370768	0.00472127	0.064510624	-2.362806237	up
2-Keto-L-gluconate	0.69778688	4.878216845	3.41666244	0.003543038	0.054496231	-2.364920979	up
Methysergide	0.278427628	6.363449167	3.495287664	0.003001571	0.05019815	-2.370684082	non
Docosatrienoic acid	-0.945041412	7.247145824	-3.50522366	0.002939297	0.049414041	-2.381360325	down
PE(14:1(9Z)/24:0)	-0.993250599	4.280375426	-3.333390659	0.004222685	0.059469482	-2.39075947	down
6'-Sialyllactose	-0.779808223	4.307703084	-3.340672558	0.004158416	0.059082628	-2.397783262	down
o-Tyrosine	-0.771719342	3.457665539	-3.216830568	0.005396008	0.070433253	-2.410429105	down
1-Methylinosine	0.551959721	3.266546833	3.195367959	0.005644782	0.072138971	-2.415227855	up
PC(20:4(8Z,11Z,14Z,17Z)/20:2(11Z,14Z))	0.709423995	4.150292791	3.318809982	0.004354347	0.060790477	-2.420516075	up
7,9-Dimethyluric acid	-0.872639365	4.750950707	-3.368036699	0.003925462	0.057034657	-2.431113281	down
PE(20:0/20:4(8Z,11Z,14Z,17Z))	-0.715419149	2.918065608	-3.133409227	0.006428153	0.07882024	-2.432195693	down
PC(24:1(15Z)/P-18:0)	-1.277835631	3.062018911	-3.138369464	0.006361682	0.07856677	-2.434107943	down
PC(24:1(15Z)/18:1(9Z))	0.785967125	6.061752662	3.450337016	0.003300146	0.052983849	-2.43521541	up
DG(20:4(5Z,8Z,11Z,14Z)/20:2(11Z,14Z)/0:0)	-0.881374608	6.715624794	-3.455408059	0.003265034	0.052683543	-2.468177929	down
PI(16:0/22:4(7Z,10Z,13Z,16Z))	0.453037692	5.853610711	3.42383335	0.003489867	0.054135087	-2.473072558	non
Genistein	0.34471474	6.015669463	3.430460596	0.003441433	0.053904596	-2.475973385	non
PC(20:1(11Z)/14:1(9Z))	0.264623917	9.350664035	3.463797929	0.003207758	0.052683543	-2.478718904	non
Acetyldigitoxin	2.047062702	3.180896302	3.094388596	0.006975437	0.083011717	-2.513002786	up
PE(22:1(13Z)/14:0)	0.425520267	4.302672356	3.296971986	0.004559189	0.062830718	-2.51510268	non
PC(P-18:1(11Z)/16:1(9Z))	0.477710823	7.753627378	3.437602808	0.003389985	0.053655499	-2.529460345	non
Oxoadipic acid	0.214264732	8.992303642	3.437305577	0.00339211	0.053655499	-2.531580232	non
PC(16:0/16:1(9Z))	-0.64020484	8.600348535	-3.427464389	0.003463247	0.053982942	-2.550684209	down
PC(22:4(7Z,10Z,13Z,16Z)/P-18:1(9Z))	0.572580568	5.284491994	3.341590478	0.004150384	0.059082628	-2.573593389	up
PI(22:2(13Z,16Z)/16:0)	0.358307786	9.81061152	3.410315704	0.00359077	0.054904582	-2.597418226	non
DG(18:0/20:5(5Z,8Z,11Z,14Z,17Z)/0:0)	0.538151951	3.820157463	3.188543871	0.005726227	0.072675551	-2.599648268	up
3-hydroxyoct-7-enoylglycine	0.489747315	3.800597901	3.182169137	0.005803355	0.073076753	-2.608001849	non
DG(20:2(11Z,14Z)/20:5(5Z,8Z,11Z,14Z,17Z)/0:0)	0.628326323	5.125280853	3.313624279	0.004402148	0.061170198	-2.61143108	up
DG(18:3(6Z,9Z,12Z)/20:1(11Z)/0:0)	-0.518997958	6.867005802	-3.391912959	0.003732816	0.056075539	-2.613206445	down
PG(16:0/18:1(9Z))	-0.28264817	6.581619868	-3.382569472	0.003807059	0.056075539	-2.619671228	non
N(6)-Methyllysine	-0.827015313	7.211967232	-3.385881585	0.003780575	0.056075539	-2.630686226	down
DG(18:3(6Z,9Z,12Z)/18:0/0:0)	-0.586154604	9.206456959	-3.388609581	0.003758899	0.056075539	-2.634951044	down
gamma-Linolenic acid	-0.390158201	9.832142639	-3.392201982	0.003730542	0.056075539	-2.636386995	non
DG(20:1(11Z)/18:3(6Z,9Z,12Z)/0:0)	0.351432977	7.811899873	3.382713887	0.003805901	0.056075539	-2.642700023	non
Butyrylcarnitine	-2.293460422	5.335648196	-3.266642596	0.004859598	0.065563732	-2.670130473	down
DG(18:4(6Z,9Z,12Z,15Z)/22:1(13Z)/0:0)	1.799431607	2.441258057	2.938814929	0.009649217	0.100923897	-2.678898746	up
PC(20:0/22:6(4Z,7Z,10Z,13Z,16Z,19Z))	2.217587503	2.466295072	2.918201184	0.010071326	0.103306806	-2.706048398	up
8-Dehydrocholesterol	-0.605248737	9.728734753	-3.35655296	0.004021604	0.057907491	-2.708990702	down
PC(18:0/22:2(13Z,16Z))	0.538126812	3.724340806	3.110250769	0.006747647	0.081148665	-2.727742212	up
Lovastatin	-0.421066137	6.8179298	-3.334103841	0.004216347	0.059469482	-2.732200024	non
PE(16:0/20:1(11Z))	2.238395688	1.954247193	2.85999359	0.011362639	0.110561919	-2.735977748	up
Simvastatin	-1.382352	3.751304164	-3.070540046	0.007332199	0.085613425	-2.741718355	down
PE(P-18:1(9Z)/18:1(9Z))	0.421604708	3.861970017	3.119989503	0.006611432	0.07980943	-2.754088251	non
(9E,11E)-Octadecadienoic acid	0.472560526	4.972155832	3.234624601	0.005197988	0.068969993	-2.754484886	non
PG(18:1(9Z)/20:3(8Z,11Z,14Z))	1.508664088	6.124075051	3.291477413	0.004612214	0.06328983	-2.754486487	up
L-Tyrosine	0.405940222	12.0092675	3.374777178	0.003870098	0.056485833	-2.773194951	non
Ursodeoxycholic acid 3-sulfate	-0.5862311	7.561808803	-3.319562279	0.004347456	0.060790477	-2.774809746	down
DG(22:1(13Z)/14:1(9Z)/0:0)	-1.340110002	5.004162211	-3.21017306	0.005471995	0.070849091	-2.784382814	down
DG(16:0/20:3(5Z,8Z,11Z)/0:0)	0.403029894	4.398484362	3.159336201	0.006088106	0.076362929	-2.817869583	non
4-Hydroxy tolbutamide	-0.5427363	10.45295615	-3.311739891	0.004419647	0.061170198	-2.825026228	down
4,5-octadienoylglycine	0.270528888	5.694674417	3.244380403	0.005092486	0.067850505	-2.827130192	non
PC(22:2(13Z,16Z)/20:4(8Z,11Z,14Z,17Z))	0.368974364	5.363930618	3.222796652	0.005328798	0.069839878	-2.827944281	non
PE(18:0/P-18:1(11Z))	0.442484438	5.180072754	3.210200665	0.005471677	0.070849091	-2.830233365	non
6-Hydroxygliclazide	-1.092118464	3.108798723	-2.944168038	0.009542454	0.100461701	-2.834880508	down
PC(24:1(15Z)/P-18:1(11Z))	0.305600888	3.771629122	3.063939609	0.007434063	0.085858246	-2.841252105	non
PC(P-18:0/22:4(7Z,10Z,13Z,16Z))	2.138671116	2.612541235	2.852817227	0.011532579	0.111603359	-2.858581613	up
2,3-Dinor-TXB2	0.443577254	4.382508967	3.129613533	0.006479479	0.079108776	-2.873483156	non
PC(20:4(5Z,8Z,11Z,14Z)/20:0)	0.39098768	4.086231424	3.092401533	0.0070045	0.083011717	-2.875745267	non
PC(20:1(11Z)/22:5(7Z,10Z,13Z,16Z,19Z))	0.358848725	7.470902553	3.268555975	0.00484008	0.065563732	-2.881880377	non
Linoelaidylcarnitine	1.025331371	4.507512565	3.120285511	0.006607334	0.07980943	-2.890879787	up
cis-4-Octenedioic acid	-0.498956605	10.13053706	-3.273466997	0.004790339	0.065177034	-2.89148535	non
Prostaglandin J2	-0.793428604	3.251796091	-2.940211754	0.009621247	0.100923897	-2.897530454	down
DG(18:1(9Z)/20:5(5Z,8Z,11Z,14Z,17Z)/0:0)	-0.603445849	6.11867629	-3.228937899	0.005260479	0.069227035	-2.897768171	down
PI(18:0/18:2(9Z,12Z))	2.421767464	0.886213607	2.715392484	0.015304225	0.127310536	-2.898056034	up
PC(18:1(11Z)/18:1(11Z))	2.212351167	2.549720188	2.819795275	0.01234687	0.117295268	-2.905322343	up
(3R,3'R,6'R,9'-cis)-beta,epsilon-Carotene-3,3'-diol	-0.597854003	6.323720585	-3.231729575	0.005229709	0.069105328	-2.909999551	down
14,15-Epoxy-5,8,11-eicosatrienoic acid	-0.432673084	3.713606924	-3.012155505	0.008282858	0.092334559	-2.916583239	non
DG(20:1(11Z)/16:0/0:0)	-0.417468024	6.869234027	-3.244688182	0.005089192	0.067850505	-2.919062658	non
Cortolone	-0.839090579	4.225040558	-3.068525537	0.007363143	0.085663231	-2.925127735	down
PE(20:4(5Z,8Z,11Z,14Z)/20:0)	2.254828526	1.818375228	2.734468849	0.014717135	0.125904416	-2.944646909	up
1-[2-Methyl-3-(methylthio) allyl]cyclohex-2-enol	0.365196358	6.074977469	3.193960793	0.005661483	0.072138971	-2.969336964	non
DG(20:3(8Z,11Z,14Z)/20:3(8Z,11Z,14Z)/0:0)	0.56548549	5.332727651	3.143173674	0.006297947	0.07837775	-2.986498351	up
TG(22:5(7Z,10Z,13Z,16Z,19Z)/18:2(9Z,12Z)/22:6(4Z,7Z,10Z,13Z,16Z,19Z))	-0.303876811	6.515932498	-3.197970972	0.005614018	0.072106445	-2.995840886	non
PC(16:0/22:6(4Z,7Z,10Z,13Z,16Z,19Z))	0.447458586	5.638668677	3.141357446	0.006321967	0.07837775	-3.029684965	non
delta-Tocopherol	-1.544785414	2.873567007	-2.796007936	0.012967694	0.119696231	-3.038092828	down
TG(16:0/16:0/20:1(11Z))	0.684111895	3.283394357	2.879784713	0.010906482	0.108088626	-3.039205994	up
Sphinganine 1-phosphate	0.525793328	3.701608475	2.950081625	0.009425851	0.099733455	-3.040668623	up
Succimer	-0.730818808	9.222703103	-3.186075936	0.005755966	0.072765378	-3.053640289	down
DG(18:4(6Z,9Z,12Z,15Z)/20:0/0:0)	0.46674606	3.783143285	2.956701044	0.00929698	0.09950868	-3.05502753	non
TG(16:1(9Z)/16:1(9Z)/18:1(9Z))	-0.990636858	2.996213638	-2.816438009	0.012432713	0.117416006	-3.056683816	down
3-hydroxyoct-3-enoylglycine	-0.489954597	5.109141399	-3.092301096	0.007005972	0.083011717	-3.061522848	non
PIP2(16:2(9Z,12Z)/16:0)	0.280384056	4.141798868	3.00490787	0.008408983	0.092470015	-3.069568935	non
Chlordiazepoxide	-0.721857202	4.693805781	-3.051561662	0.007628846	0.086559102	-3.072666581	down
PA(18:1(11Z)/18:1(9Z))	2.04272607	2.428014938	2.717842375	0.015227584	0.127310536	-3.079536049	up
PC(22:2(13Z,16Z)/14:1(9Z))	2.049885685	2.368732837	2.70141336	0.015748701	0.129794782	-3.098300655	up
DG(18:3(6Z,9Z,12Z)/18:1(9Z)/0:0)	0.343824467	6.902239995	3.154078283	0.006155604	0.076909119	-3.108985817	non
PC(18:0/20:3(8Z,11Z,14Z))	2.364509285	1.269518543	2.601393559	0.01931078	0.144202128	-3.115326559	up
PE(22:1(13Z)/16:1(9Z))	-0.534863837	5.374911532	-3.073510181	0.00728681	0.085393961	-3.132829266	down
Thyroxine sulfate	-1.435266277	3.361845561	-2.801035264	0.012834017	0.119622967	-3.156658082	down
Phthalic acid	-0.775683392	3.035292978	-2.77322559	0.013590549	0.122366499	-3.15935247	down
Maslinic acid	0.363212782	9.17712019	3.125993464	0.006528806	0.079409082	-3.174609041	non
PC(22:4(7Z,10Z,13Z,16Z)/18:1(9Z))	0.412194634	4.93523912	3.025677066	0.008052484	0.090391626	-3.174952139	non
PC(22:0/18:3(6Z,9Z,12Z))	0.274379235	5.557711371	3.06352537	0.007440502	0.085858246	-3.178989719	non
MG(18:1(9Z)/0:0/0:0)	0.525722208	3.34797591	2.817750455	0.012399086	0.117416006	-3.184848678	up
6-Hydroxyfluvastatin	-0.731874548	4.53765063	-2.971805257	0.009009328	0.097077024	-3.201044202	down
PC(20:0/16:1(9Z))	2.671367032	1.668517124	2.564159559	0.020824355	0.149720916	-3.213562461	up
PC(18:2(9Z,12Z)/22:4(7Z,10Z,13Z,16Z))	0.334617246	10.90833645	3.133175669	0.0064313	0.07882024	-3.213645961	non
PE(20:4(8Z,11Z,14Z,17Z)/18:0)	0.286978655	6.403811589	3.085101893	0.007112288	0.083654055	-3.219256916	non
Pyridoxine 5'-phosphate	0.438252414	5.610891584	3.041486898	0.007791073	0.088088499	-3.229236598	non
PC(22:0/20:1(11Z))	0.409507296	9.315993265	3.09295351	0.006996415	0.083011717	-3.243178979	non
D-Maltose	0.448448744	7.582637556	3.087777327	0.007072594	0.083493013	-3.251410385	non
Epinephrine sulfate	0.986712203	2.006839628	2.587499572	0.019862854	0.147297053	-3.266727288	up
PC(22:1(13Z)/P-18:1(11Z))	0.585100846	3.464648751	2.786915162	0.013212901	0.121405445	-3.280440164	up
PE(20:4(8Z,11Z,14Z,17Z)/20:0)	1.632953326	1.762140698	2.545917625	0.021606588	0.153833158	-3.286061401	up
D-Mannose	0.246016149	8.322606602	3.059749884	0.007499442	0.085858246	-3.306643313	non
Clozapine	0.246016149	8.322606602	3.059749884	0.007499442	0.085858246	-3.306643313	non
DG(20:0/18:0/0:0)	0.482529418	8.181035645	3.058847321	0.007513599	0.085858246	-3.307918011	non
PC(18:1(11Z)/20:2(11Z,14Z))	0.481832489	3.269943511	2.737569644	0.014623781	0.12555337	-3.315382723	non
PA(18:1(9Z)/18:1(11Z))	0.348361195	7.132560407	3.055778692	0.00756193	0.086104107	-3.316231067	non
PE(20:4(8Z,11Z,14Z,17Z)/20:1(11Z))	-0.417906045	5.066874347	-2.951189194	0.009404168	0.099733455	-3.340608411	non
Acitretin	0.220163109	4.883007224	2.934687768	0.009732325	0.101193339	-3.352092664	non
PI(22:4(10Z,13Z,16Z,19Z)/18:0)	0.579782139	5.512548846	2.973392331	0.008979613	0.097077024	-3.352661559	up
TG(16:0/18:0/18:1(9Z))	-0.410616732	7.169892875	-3.035487079	0.007889284	0.088885933	-3.355522102	non
DG(16:0/22:1(13Z)/0:0)	-0.546404361	3.359017965	-2.721514464	0.015113399	0.127039596	-3.365128254	down
Leucylproline	1.827258784	2.445876388	2.567449479	0.020686185	0.149720916	-3.366476036	up
7alpha-Hydroxycholesterol	0.433157074	3.545846409	2.75882644	0.013999025	0.123153063	-3.367106784	non
PC(18:1(11Z)/24:1(15Z))	1.320231024	6.828192028	3.009853188	0.008322722	0.092334559	-3.383221355	up
O-Desmethylangolensin	0.529338642	6.717640282	3.008361233	0.008348654	0.092334559	-3.394860489	up
PE(18:0/20:1(11Z))	0.608416693	6.423887736	2.997665818	0.008536887	0.093237902	-3.39627158	up
PC(22:4(7Z,10Z,13Z,16Z)/P-18:1(11Z))	0.40687321	6.932369376	3.007256383	0.008367909	0.092334559	-3.408453111	non
PC(22:4(7Z,10Z,13Z,16Z)/P-16:0)	0.559017525	4.223751217	2.834342271	0.011981506	0.114501835	-3.421761493	up
3-Dehydrosphinganine	-1.018148673	3.006890466	-2.62057435	0.018572703	0.142445283	-3.428119917	down
PC(20:0/20:4(5Z,8Z,11Z,14Z))	0.297922035	8.199939679	2.99799277	0.008531072	0.093237902	-3.430992083	non
PC(20:3(5Z,8Z,11Z)/14:0)	0.634503998	6.400229712	2.979461217	0.008866863	0.096312002	-3.431060986	up
TG(18:0/18:1(9Z)/20:1(11Z))	1.443434987	2.960718088	2.603702975	0.01922045	0.144091057	-3.435861273	up
DG(14:0/24:0/0:0)	1.429556123	1.889530126	2.473739247	0.024984593	0.169180834	-3.438101712	up
DG(20:0/18:4(6Z,9Z,12Z,15Z)/0:0)	0.507517162	6.110487532	2.95986124	0.009236064	0.099187293	-3.447317883	up
PE(15:0/22:2(13Z,16Z))	0.286266618	5.240015539	2.908537395	0.010275354	0.104333064	-3.447754979	non
PC(22:1(13Z)/18:3(6Z,9Z,12Z))	2.832610995	1.612260275	2.417033877	0.027983549	0.180469472	-3.451882981	up
DG(20:4(8Z,11Z,14Z,17Z)/18:2(9Z,12Z)/0:0)	0.448153424	6.706233142	2.97883995	0.008878341	0.096312002	-3.454504829	non
PC(P-18:0/22:5(4Z,7Z,10Z,13Z,16Z))	-1.918768182	0.940593959	-2.377415614	0.030277081	0.186960977	-3.460255069	down
PG(18:1(11Z)/22:5(7Z,10Z,13Z,16Z,19Z))	1.085618877	3.746080046	2.723690606	0.015046122	0.12680603	-3.465853928	up
PC(P-18:1(11Z)/14:0)	-2.039665331	-0.330957766	-2.330612022	0.033214202	0.193910548	-3.476679195	down
PC(22:5(7Z,10Z,13Z,16Z,19Z)/P-16:0)	0.321687005	5.099557349	2.881307492	0.010872132	0.108081778	-3.48439828	non
PC(20:1(11Z)/20:2(11Z,14Z))	0.570963952	3.552474727	2.690563468	0.016102219	0.130474264	-3.495503284	up
3-Oxotetradecanoic acid	2.184250242	3.118611312	2.562624574	0.020889122	0.149720916	-3.501275412	up
TG(18:1(9Z)/18:1(9Z)/20:4(5Z,8Z,11Z,14Z))	0.340077306	3.599612105	2.698097471	0.015855941	0.129881194	-3.503770289	non
PC(18:2(9Z,12Z)/P-16:0)	-0.487230111	5.911388295	-2.918529662	0.010064461	0.103306806	-3.508432044	non
Decanal	0.520909473	5.130428497	2.86264474	0.011300475	0.110291266	-3.525657458	up
Cyclic AMP	0.389735354	5.719743968	2.900635605	0.010445168	0.104810736	-3.52638335	non
TG(20:0/20:4(5Z,8Z,11Z,14Z)/20:4(5Z,8Z,11Z,14Z))	0.197227301	5.652536948	2.897024703	0.010523675	0.105269534	-3.526624305	non
TG(16:1(9Z)/18:2(9Z,12Z)/20:1(11Z))	-0.417073964	4.189349852	-2.774022851	0.013568272	0.122366499	-3.528198906	non
DG(14:1(9Z)/22:4(7Z,10Z,13Z,16Z)/0:0)	0.373027337	8.495105683	2.949247154	0.009442221	0.099733455	-3.531081643	non
15-Keto-prostaglandin F2a	-0.690390195	3.621735573	-2.664095368	0.016996922	0.134125206	-3.553366589	down
Cer(d18:1/18:1(9Z))	0.536596956	6.555478392	2.923184774	0.009967657	0.103245631	-3.556150702	up
4-Androstenediol	-1.625978755	5.708765891	-2.86971245	0.011136364	0.109020925	-3.560775152	down
Uracil mustard	0.175502438	9.12726965	2.934406814	0.009738007	0.101193339	-3.56235691	non
Ramipril	-0.605327654	10.63363431	-2.953683286	0.009355517	0.099733455	-3.56496685	down
PC(18:1(9Z)/20:5(5Z,8Z,11Z,14Z,17Z))	0.33687734	13.41465564	3.024088123	0.008079227	0.090391626	-3.571817727	non
Mefenamic acid	0.880638003	7.154765997	2.921529074	0.010001983	0.103268061	-3.581247025	up
TG(20:1(11Z)/20:4(5Z,8Z,11Z,14Z)/20:4(5Z,8Z,11Z,14Z))	0.546113954	4.19247017	2.746709102	0.014351935	0.124465114	-3.585384169	up
MG(0:0/22:5(4Z,7Z,10Z,13Z,16Z)/0:0)	-1.169508492	7.379448356	-2.916724089	0.010102254	0.103306806	-3.588175404	down
TG(16:0/16:1(9Z)/18:2(9Z,12Z))	-0.846816777	6.910030364	-2.902854911	0.0103972	0.104656458	-3.607895873	down
TG(18:0/20:0/20:4(5Z,8Z,11Z,14Z))	0.284423483	5.956337986	2.870010719	0.011129489	0.109020925	-3.613878443	non
Methionine sulfoxide	-0.442444924	7.212454091	-2.907378634	0.010300088	0.104333064	-3.614035425	non
PE(22:1(13Z)/18:4(6Z,9Z,12Z,15Z))	0.433640814	3.768166959	2.658915319	0.017177525	0.134202024	-3.632029679	non
DG(20:4(5Z,8Z,11Z,14Z)/16:0/0:0)	0.430433597	8.295124472	2.894354026	0.010582109	0.105525315	-3.640017981	non
Turanose	0.461627594	5.071300923	2.799398164	0.012877401	0.119622967	-3.64327723	non
CL(i-14:0/i-17:0/18:2(9Z,11Z)/i-13:0)	0.80651768	3.493913074	2.595721939	0.019534345	0.14546654	-3.646309513	up
1-Methyladenine	-0.896919113	5.85359437	-2.837495724	0.011903698	0.114501835	-3.655579941	down
CL(i-14:0/i-17:0/i-17:0/i-20:0)	0.283473778	3.963222133	2.674079045	0.016653971	0.132366093	-3.667979959	non
Stanozolol	-0.427730597	10.71726231	-2.903371549	0.010386064	0.104656458	-3.669779849	non
DG(20:0/18:3(9Z,12Z,15Z)/0:0)	0.550861452	4.716831632	2.757328238	0.014042201	0.123195371	-3.676061071	up
TG(16:0/18:2(9Z,12Z)/18:2(9Z,12Z))	-0.364831719	7.122547928	-2.874141717	0.011034699	0.108688402	-3.679797621	non
PC(20:4(8Z,11Z,14Z,17Z)/14:0)	0.353385022	5.307858914	2.795832882	0.012972373	0.119696231	-3.680448746	non
PC(16:0/20:2(11Z,14Z))	0.454497713	5.843582511	2.827514306	0.012151674	0.115783454	-3.685515585	non
DG(24:1(15Z)/14:1(9Z)/0:0)	0.971281071	2.784388893	2.451987178	0.026097131	0.17385454	-3.688049563	up
PC(18:1(11Z)/16:0)	-0.359186423	11.69097786	-2.913069239	0.010179179	0.103762993	-3.70113554	non
Acetaminophen	0.179564141	6.608386743	2.852540447	0.011539183	0.111603359	-3.702617795	non
PG(18:3(6Z,9Z,12Z)/20:3(8Z,11Z,14Z))	1.502794041	5.689167873	2.79892657	0.012889924	0.119622967	-3.706445004	up
Travoprost	-0.60185058	10.58903155	-2.877799636	0.01095142	0.108200031	-3.715119084	down
DG(22:5(7Z,10Z,13Z,16Z,19Z)/18:0/0:0)	-0.565780364	5.221055858	-2.767981809	0.013737953	0.12253491	-3.724218085	down
6-hydroxyoct-1-enoylglycine	0.366325585	5.903894257	2.810840787	0.012577117	0.118085156	-3.72559161	non
PE(20:3(8Z,11Z,14Z)/20:2(11Z,14Z))	-1.695087797	5.469508031	-2.765015077	0.013822032	0.122603715	-3.736353677	down
PC(18:4(6Z,9Z,12Z,15Z)/P-18:0)	0.240136397	5.611714058	2.785261721	0.013257969	0.121405445	-3.742978129	non
PE(16:1(9Z)/16:0)	1.575016359	2.068907692	2.308464148	0.034695298	0.198651436	-3.753021495	up
Ganglioside GD3 (d18:1/16:0)	-1.060540228	4.404538094	-2.661586898	0.017084151	0.134125206	-3.758114505	down
PI(16:0/22:3(10Z,13Z,16Z))	0.179817397	8.403912132	2.835039432	0.011964262	0.114501835	-3.759058009	non
Quinine	0.438069387	9.207205013	2.836338125	0.011932203	0.114501835	-3.759098641	non
15-Deoxy-d-12,14-PGJ2	-0.496837112	5.707276374	-2.778749688	0.013436918	0.121881201	-3.762578252	non
DG(14:1(9Z)/20:3(5Z,8Z,11Z)/0:0)	-0.7281054	5.25921383	-2.744584597	0.014414688	0.124465114	-3.774157997	down
Androsterone sulfate	0.407472595	5.579586649	2.762254035	0.013900728	0.122962087	-3.782897807	non
Biocytin	-0.675583536	4.924717218	-2.713600245	0.015360528	0.127448722	-3.786523805	down
PE(P-18:0/18:2(9Z,12Z))	0.415495429	5.685318529	2.765223939	0.013816097	0.122603715	-3.790440026	non
Morphine	0.89832536	2.76527419	2.385859438	0.0297739	0.186523402	-3.802459591	up
DG(18:1(11Z)/18:4(6Z,9Z,12Z,15Z)/0:0)	0.311779902	7.142437191	2.813296695	0.012513558	0.117832944	-3.803508167	non
PG(18:1(9Z)/18:0)	1.16583948	6.27580261	2.783401533	0.01330885	0.121405445	-3.805308174	up
DG(16:1(9Z)/14:1(9Z)/0:0)	0.345583504	4.742702275	2.689674775	0.016131511	0.130474264	-3.815706307	non
Clidinium	0.348980848	8.077597493	2.801451114	0.01282302	0.119622967	-3.823878578	non
PC(20:1(11Z)/22:0)	-0.76425845	5.468057028	-2.728532649	0.014897459	0.126348594	-3.829664366	down
DG(18:3(6Z,9Z,12Z)/22:2(13Z,16Z)/0:0)	0.796793207	3.074297891	2.416398605	0.028018997	0.180469472	-3.841385217	up
Apigenin	-0.646243691	4.301365786	-2.619009404	0.018631896	0.142445283	-3.843647932	down
TG(20:0/20:1(11Z)/20:4(5Z,8Z,11Z,14Z))	-0.661771718	5.158693205	-2.699113174	0.015823018	0.129881194	-3.850231694	down
PC(P-18:1(9Z)/18:3(6Z,9Z,12Z))	-0.704313504	7.205543255	-2.784114826	0.013289317	0.121405445	-3.855415531	down
Ranitidine	-0.333342483	6.842559851	-2.779725101	0.013409966	0.121881201	-3.858369081	non
PI(18:1(9Z)/16:1(9Z))	0.207980632	6.041897844	2.74899168	0.014284806	0.124465114	-3.861729439	non
PC(20:3(5Z,8Z,11Z)/20:2(11Z,14Z))	0.860332468	8.086617171	2.77174412	0.013632038	0.122366499	-3.88446011	up
PI(18:1(11Z)/20:3(8Z,11Z,14Z))	0.342713146	5.918635939	2.728019475	0.014913148	0.126348594	-3.890328135	non
N-Acetylgalactosamine	0.223912216	4.862828859	2.6594459	0.017158942	0.134202024	-3.89133697	non
LysoPE(22:6(4Z,7Z,10Z,13Z,16Z,19Z)/0:0)	-1.786182067	2.579355466	-2.28203346	0.036543573	0.204777373	-3.891941593	down
PC(14:0/P-18:1(9Z))	0.433214159	9.155804206	2.768851265	0.013713406	0.12253491	-3.892351485	non
PC(20:1(11Z)/P-18:0)	-0.540287655	3.395666675	-2.440143232	0.026722456	0.176192622	-3.905989176	down
O-Phosphotyrosine	-0.449964072	6.760829678	-2.752105881	0.014193709	0.124185283	-3.907339406	non
PC(18:1(11Z)/P-18:0)	-0.68378584	5.331035459	-2.676162557	0.016583243	0.132366093	-3.916597071	down
PC(20:3(5Z,8Z,11Z)/22:2(13Z,16Z))	0.331885934	9.696687118	2.75944936	0.013981111	0.123153063	-3.917381997	non
PC(22:1(13Z)/P-18:0)	0.278541856	6.403148677	2.733610133	0.01474309	0.125904416	-3.922434739	non
PC(14:1(9Z)/14:0)	0.414242557	7.033911006	2.744421977	0.014419502	0.124465114	-3.936226804	non
PC(18:3(9Z,12Z,15Z)/20:0)	0.394955941	8.109434611	2.741733734	0.014499313	0.124818481	-3.941831578	non
Bethanidine	-1.282877136	2.50912251	-2.255640068	0.03848056	0.210723405	-3.944448667	down
Fondaparinux sodium	-0.704193399	9.83631182	-2.747718015	0.014322226	0.124465114	-3.946382837	down
L-Sorbose	1.392626142	2.527768837	2.256989619	0.038379243	0.210723405	-3.949899798	up
PC(18:1(9Z)/24:0)	-0.515309659	5.373412104	-2.661918837	0.017072584	0.134125206	-3.950376824	down
DOPA sulfate	-0.4211054	6.897296023	-2.731558283	0.014805285	0.126100186	-3.954461264	non
Cer(d18:1/25:0)	0.399467934	3.498518762	2.43857868	0.026806111	0.176382016	-3.956353694	non
Naftifine	-0.437801344	11.33680124	-2.771358587	0.013642855	0.122366499	-3.964353914	non
PE(20:0/20:5(5Z,8Z,11Z,14Z,17Z))	-0.438464161	3.159841758	-2.366745562	0.030924368	0.187483033	-3.964578864	non
Lithocholate 3-O-glucuronide	0.956195217	4.868095914	2.614871569	0.018789278	0.142572092	-3.966474701	up
Clobazam	-3.331531379	7.920279978	-2.716536273	0.015268397	0.127310536	-3.968833137	down
Pantothenic acid	0.44123598	7.601901458	2.72547525	0.014991163	0.12667533	-3.97637322	non
PC(16:0/24:1(15Z))	0.176716331	5.109963407	2.630698147	0.018194108	0.14043577	-3.976743219	non
Hypogeic acid	-0.610988565	7.485531703	-2.716913144	0.01525661	0.127310536	-3.992166897	down
PG(18:2(9Z,12Z)/16:0)	-0.263846754	4.144454715	-2.525479161	0.022516248	0.15820497	-4.000022342	non
PC(18:3(9Z,12Z,15Z)/20:3(8Z,11Z,14Z))	-0.735464322	4.627345426	-2.572271002	0.020485271	0.149156928	-4.001895162	down
PC(20:4(5Z,8Z,11Z,14Z)/18:0)	0.656716351	6.292599844	2.685147299	0.016281537	0.131027605	-4.006542673	up
PE(P-18:0/20:1(11Z))	0.563773165	6.836940432	2.700921994	0.015764548	0.129794782	-4.012619184	up
PG(18:3(6Z,9Z,12Z)/18:0)	1.099212427	6.249809646	2.674861591	0.016627373	0.132366093	-4.016952523	up
2,6 Dimethylheptanoyl carnitine	-0.641662553	4.307695831	-2.526608817	0.022465032	0.15820497	-4.021694717	down
PC(20:0/14:1(9Z))	-0.206330528	6.555226335	-2.688032278	0.016185784	0.130584301	-4.022317983	non
PC(22:5(4Z,7Z,10Z,13Z,16Z)/16:0)	-0.189745433	4.959879446	-2.594805303	0.019570709	0.14546654	-4.027100993	non
PC(14:1(9Z)/P-18:1(9Z))	-0.401836235	10.2717649	-2.71074361	0.015450681	0.127866336	-4.031412135	non
PI(18:1(11Z)/18:3(9Z,12Z,15Z))	0.37399287	8.814723162	2.696323782	0.015913593	0.129952187	-4.033630539	non
3-Hydroxychlorpropamide	0.173598738	7.702839283	2.695343264	0.01594555	0.129952187	-4.034213495	non
PE(20:4(5Z,8Z,11Z,14Z)/20:1(11Z))	-0.493415106	4.387803746	-2.531144483	0.022260513	0.157441644	-4.041087903	non
PE(20:3(8Z,11Z,14Z)/20:1(11Z))	0.567999239	7.189360864	2.690734058	0.016096603	0.130474264	-4.043283812	up
DG(22:1(13Z)/16:0/0:0)	1.147824745	2.920075276	2.265763347	0.037726586	0.208502696	-4.049424761	up
PC(P-18:1(9Z)/16:1(9Z))	-0.453342184	5.423891256	-2.611959968	0.018900782	0.142572092	-4.05336332	non
TG(18:2(9Z,12Z)/20:4(5Z,8Z,11Z,14Z)/20:4(5Z,8Z,11Z,14Z))	-0.312352883	7.922253781	-2.681543523	0.016401912	0.131666348	-4.0601481	non
PG(18:1(9Z)/22:4(7Z,10Z,13Z,16Z))	-1.297968483	3.27278399	-2.306342507	0.034840375	0.198651436	-4.060487175	down
PG(18:0/18:3(6Z,9Z,12Z))	-0.216049306	5.811772826	-2.631701791	0.01815698	0.14043577	-4.065677321	non
PI(16:0/18:0)	0.347216606	9.280006589	2.679980853	0.016454375	0.131758097	-4.067362584	non
PC(P-18:1(11Z)/22:5(7Z,10Z,13Z,16Z,19Z))	0.417118912	5.135012021	2.583549323	0.020022549	0.147798635	-4.070756187	non
Sulfolithocholylglycine	-0.63574608	6.087924771	-2.639871527	0.01785745	0.13883843	-4.073710119	down
Thiethylperazine	-0.738976588	3.13542135	-2.293075536	0.035760502	0.201450829	-4.076216465	down
PC(16:1(9Z)/20:2(11Z,14Z))	-0.412570378	7.130228196	-2.670581541	0.016773351	0.132985754	-4.080782775	non
PC(18:3(6Z,9Z,12Z)/18:3(9Z,12Z,15Z))	0.167236495	6.77749682	2.663102162	0.017031408	0.134125206	-4.08562789	non
PC(22:5(4Z,7Z,10Z,13Z,16Z)/18:1(9Z))	-0.495129349	5.202176984	-2.579747819	0.020177389	0.148259947	-4.08706665	non
PC(P-18:0/18:3(9Z,12Z,15Z))	-1.506730094	0.331734369	-1.919032984	0.073037773	0.294628502	-4.09982245	non
PC(P-18:1(9Z)/14:0)	0.308622365	5.494570108	2.585149075	0.01995773	0.147659607	-4.116022153	non
Ercalcitriol	-0.505357377	5.302975671	-2.567622776	0.020678932	0.149720916	-4.123095787	down
Difucosyllacto-N-hexaose a	-0.669977791	3.934002866	-2.414145676	0.028145052	0.180747524	-4.125489336	down
Isoeugenol	-0.437849213	4.034484933	-2.433480138	0.027080447	0.177459825	-4.132913904	non
PI(20:3(8Z,11Z,14Z)/18:1(11Z))	0.281080336	8.99163924	2.644931892	0.017674302	0.137748015	-4.133806584	non
MG(18:3(6Z,9Z,12Z)/0:0/0:0)	0.374984022	6.741692023	2.636548376	0.017978712	0.139443585	-4.134473712	non
PI(20:3(8Z,11Z,14Z)/18:1(9Z))	-1.69251711	1.719342831	-2.020379472	0.060448957	0.265892605	-4.146012559	non
11-Ketoetiocholanolone	-0.272158088	6.419954324	-2.617736765	0.018680166	0.14247509	-4.148448634	non
CE(20:0)	-0.470603223	2.955193573	-2.223511342	0.040967313	0.219748889	-4.150982987	non
MG(0:0/22:0/0:0)	-0.485816658	6.773991596	-2.624726401	0.018416527	0.141811674	-4.155981761	non
PC(18:1(11Z)/20:3(5Z,8Z,11Z))	0.919347919	4.334073678	2.445155893	0.026456093	0.175155699	-4.175281288	up
PC(14:0/18:4(6Z,9Z,12Z,15Z))	0.442408139	4.097908959	2.419412248	0.027851211	0.180469472	-4.185627926	non
Oleanolic acid	-0.645401783	5.092095712	-2.517576583	0.022877645	0.160212513	-4.189738032	down
PC(P-18:0/24:1(15Z))	0.966772823	8.086194457	2.6152171	0.018776087	0.142572092	-4.190469923	up
Diphenhydramine	-0.233902868	5.454058833	-2.540300462	0.021853043	0.155243633	-4.195582187	non
Amikacin	0.896128737	6.036927429	2.57310628	0.020450655	0.149156928	-4.196217881	up
Theobromine	-0.589330937	3.110857131	-2.223184876	0.040993331	0.219748889	-4.198069207	down
Metixene	0.267243674	5.039762322	2.510261051	0.023217106	0.161363916	-4.198160058	non
Canthaxanthin	-0.514214848	9.060357518	-2.611889321	0.018903495	0.142572092	-4.198805327	down
alpha-Linolenic acid	0.485735841	5.894566852	2.566795776	0.02071357	0.149720916	-4.198845076	non
PI(18:3(9Z,12Z,15Z)/18:1(11Z))	0.415138222	7.277270679	2.611592753	0.01891489	0.142572092	-4.199140993	non
Tuftsin	-0.659402861	4.937092976	-2.498173788	0.023788499	0.163565032	-4.202164247	down
5-hydroxyoct-4-enoylglycine	-1.406736594	4.5873115	-2.430398402	0.027247549	0.178191198	-4.212843209	down
11-Hydroxyandrosterone	0.569306756	2.800359308	2.160902207	0.046246486	0.233980739	-4.212901915	up
TG(16:1(9Z)/16:1(9Z)/18:0)	0.141252204	5.970261701	2.561361955	0.020942541	0.149769483	-4.218852739	non
PC(16:1(9Z)/P-18:0)	1.094922289	2.994560352	2.17225538	0.045244824	0.233605408	-4.235414388	up
DG(18:0/18:3(9Z,12Z,15Z)/0:0)	0.248583408	3.961552158	2.368375889	0.030824631	0.187483033	-4.242613575	non
TG(16:0/16:0/18:1(9Z))	-0.378710247	7.212617442	-2.582138644	0.020079875	0.147881833	-4.253625025	non
PC(16:0/18:3(6Z,9Z,12Z))	-0.543549899	6.870486166	-2.574475914	0.020394014	0.149156928	-4.256348525	down
Cis-8,11,14,17-Eicosatetraenoic acid	0.153329746	7.759412587	2.578225422	0.020239718	0.148378392	-4.26032648	non
DG(16:0/22:0/0:0)	-0.699960783	3.209942994	-2.202856883	0.042643851	0.22611544	-4.261220479	down
Thiamine	0.568955722	3.562771976	2.27938642	0.036733655	0.204777373	-4.262317284	up
DG(14:0/20:2(11Z,14Z)/0:0)	0.500198505	5.193670163	2.48599666	0.024377624	0.166123842	-4.263774152	up
DG(14:1(9Z)/22:5(7Z,10Z,13Z,16Z,19Z)/0:0)	-0.199429332	11.06735019	-2.609773709	0.018984924	0.142764849	-4.265721441	non
DG(22:5(4Z,7Z,10Z,13Z,16Z)/18:0/0:0)	-0.61809884	4.39985869	-2.408615028	0.028456773	0.181659442	-4.265785798	down
PC(22:0/18:4(6Z,9Z,12Z,15Z))	0.309885841	7.279880059	2.565493233	0.020768238	0.149720916	-4.288251728	non
L-Histidine	-1.822558084	8.045849958	-2.562748394	0.02088389	0.149720916	-4.291752366	down
Prostaglandin D3	-1.065013565	5.492650094	-2.487218023	0.024317916	0.166123842	-4.291954481	down
DG(22:5(4Z,7Z,10Z,13Z,16Z)/18:1(11Z)/0:0)	-0.556961088	4.945643795	-2.448803859	0.026263827	0.174602793	-4.298150544	down
DG(18:3(9Z,12Z,15Z)/18:3(9Z,12Z,15Z)/0:0)	-1.434840391	4.02763788	-2.294297223	0.035674833	0.201321421	-4.299720321	down
12,13-DHOME	-1.330380152	8.647866834	-2.555065346	0.021210887	0.151351464	-4.306334697	down
PC(18:4(6Z,9Z,12Z,15Z)/P-18:1(11Z))	0.312629348	5.236402405	2.465702122	0.025390325	0.170104106	-4.307072784	non
1-Methylhistidine	1.444167567	2.727074267	2.074612916	0.054552567	0.253749895	-4.30790642	non
PE(18:1(9Z)/P-18:1(11Z))	0.461025872	3.149460638	2.170608579	0.045388865	0.233806954	-4.311644324	non
Aspartame	-0.68724665	4.609189107	-2.405722057	0.028621123	0.181985	-4.31334108	down
PC(20:5(5Z,8Z,11Z,14Z,17Z)/20:1(11Z))	0.182692351	6.129441765	2.515035056	0.022995041	0.160212513	-4.321541741	non
Carisoprodol	-0.184138394	6.194665975	-2.514894556	0.023001547	0.160212513	-4.327152341	non
16(R)-HETE	0.121556968	12.54858753	2.619084993	0.018629033	0.142445283	-4.327581535	non
PC(15:0/15:0)	-0.5267116	4.876303464	-2.427057873	0.027429783	0.179018358	-4.328364712	down
Estriol	0.33375102	12.05258805	2.602919946	0.019251032	0.144091057	-4.331934281	non
PC(18:1(11Z)/20:5(5Z,8Z,11Z,14Z,17Z))	-0.599397381	3.688686225	-2.256589293	0.038409271	0.210723405	-4.334453475	down
DG(22:6(4Z,7Z,10Z,13Z,16Z,19Z)/18:1(11Z)/0:0)	-0.422311543	7.86259527	-2.538802665	0.021919211	0.155369945	-4.336104652	non
Alclometasone	0.978550694	6.050638666	2.499364309	0.023731633	0.163524191	-4.336489359	up
TG(16:1(9Z)/18:0/18:1(9Z))	0.442395375	5.008041918	2.433789931	0.027063702	0.177459825	-4.337702144	non
Nabilone	0.452475595	4.80838367	2.417070968	0.02798148	0.180469472	-4.341867088	non
Carbenicillin	-0.425652087	3.370567745	-2.187730828	0.0439117	0.228525882	-4.353594475	non
PC(18:2(9Z,12Z)/P-18:0)	-0.153258052	7.740905	-2.526362685	0.022476182	0.15820497	-4.359839186	non
PI(16:0/18:1(11Z))	-1.452997197	3.432563759	-2.151186232	0.047119895	0.234213597	-4.36620402	down
DG(18:0/22:4(7Z,10Z,13Z,16Z)/0:0)	0.382804925	4.62127364	2.382487921	0.029973863	0.186523402	-4.378167946	non
PI(16:2(9Z,12Z)/16:0)	0.465309118	7.702202381	2.516120602	0.022944829	0.160212513	-4.37984407	non
PE(P-18:1(11Z)/22:4(7Z,10Z,13Z,16Z))	0.748676078	6.020643625	2.472898413	0.025026751	0.169180834	-4.387171047	up
Octadecanol	0.232930515	4.071965884	2.307411132	0.034767232	0.198651436	-4.387717075	non
Promazine	0.210515353	6.686635143	2.499531784	0.023723644	0.163524191	-4.394300659	non
TG(18:1(9Z)/18:1(9Z)/20:1(11Z))	-0.762135496	4.442806049	-2.339008225	0.032668363	0.192444781	-4.394317961	down
Cyclic GMP	1.261189175	3.486447842	2.16280326	0.046077348	0.233980739	-4.39542788	up
3-Chlorotyrosine	-1.938028315	4.34946497	-2.26039113	0.038124974	0.210342428	-4.399278681	down
PC(P-18:1(11Z)/P-18:0)	-1.316823335	0.939311381	-1.763619673	0.096920582	0.332941684	-4.399422195	non
PC(20:2(11Z,14Z)/20:1(11Z))	-0.4206719	5.144869644	-2.409803861	0.028389494	0.181590969	-4.399992871	non
PG(16:1(9Z)/20:4(5Z,8Z,11Z,14Z))	-1.142409191	2.992932389	-2.066009929	0.055451463	0.253749895	-4.402170887	non
DG(20:4(5Z,8Z,11Z,14Z)/18:1(9Z)/0:0)	0.224430428	7.364464897	2.503931502	0.023514673	0.16307908	-4.405898979	non
MG(0:0/24:1(15Z)/0:0)	-0.526997938	8.263857129	-2.500772092	0.023664556	0.163524191	-4.40827469	down
Myricetin	-0.680381521	5.318913967	-2.415923207	0.028045552	0.180469472	-4.410307096	down
PC(P-18:0/20:3(5Z,8Z,11Z))	-0.28014607	6.157723219	-2.468561784	0.025245253	0.169586834	-4.411034492	non
PI(20:3(8Z,11Z,14Z)/18:2(9Z,12Z))	0.390338015	4.691291154	2.370251573	0.030710259	0.187483033	-4.412174224	non
Formononetin	-0.528307939	5.415791429	-2.418910359	0.027879088	0.180469472	-4.417386344	down
PC(18:1(9Z)/P-18:1(9Z))	-0.527154779	6.687896343	-2.485145316	0.024419325	0.166123842	-4.417527939	down
PI(20:4(8Z,11Z,14Z,17Z)/18:1(11Z))	-0.239010444	4.157582355	-2.300610771	0.03523515	0.199553101	-4.420334479	non
Cinnarizine	-0.595805639	9.332795585	-2.496548811	0.023866326	0.163749514	-4.421613099	down
PE(22:4(7Z,10Z,13Z,16Z)/18:1(9Z))	-0.466856823	8.419580947	-2.492182075	0.024076667	0.164840462	-4.424763384	non
DG(22:5(4Z,7Z,10Z,13Z,16Z)/16:0/0:0)	-0.489408967	4.335684082	-2.314915522	0.034257617	0.197488704	-4.429769685	non
Cer(d18:1/18:0)	0.40992638	3.640346227	2.200156557	0.042867676	0.226394913	-4.434782759	non
DG(20:5(5Z,8Z,11Z,14Z,17Z)/18:1(9Z)/0:0)	-0.516334427	5.600333288	-2.421175978	0.027753455	0.180469472	-4.435801491	down
Lacto-N-difucohexaose	0.349101096	4.633916974	2.351457745	0.031874479	0.190593953	-4.437988471	non
Heme	0.223977807	6.866327408	2.479190923	0.024712886	0.167765489	-4.442477847	non
Cefotaxime	1.012661978	4.971428716	2.369767819	0.030739718	0.187483033	-4.444294711	up
DG(18:0/18:2(9Z,12Z)/0:0)	0.336200574	3.689742357	2.201642931	0.042744339	0.22611544	-4.4507816	non
PE(20:0/18:2(9Z,12Z))	-0.479893563	6.84021841	-2.469017323	0.025222216	0.169586834	-4.456523357	non
DG(14:1(9Z)/22:5(4Z,7Z,10Z,13Z,16Z)/0:0)	-0.298001695	5.52709227	-2.405862137	0.028613144	0.181985	-4.457609366	non
PC(P-18:0/22:6(4Z,7Z,10Z,13Z,16Z,19Z))	-1.279241007	0.636394338	-1.685475391	0.111339193	0.353981149	-4.45950674	non
6-[3-(2-carboxyeth-1-en-1-yl)phenoxy]-3,4,5-trihydroxyoxane-2-carboxylic acid	-0.362792848	4.659336391	-2.331473086	0.033157833	0.193910548	-4.47358023	non
Campesterol	-0.527026249	7.251972731	-2.464957951	0.025428206	0.170104106	-4.475261915	down
PC(18:1(9Z)/P-16:0)	0.319823849	5.37822884	2.383803442	0.029895691	0.186523402	-4.479088147	non
CE(22:2(13Z,16Z))	-0.637130926	3.184402538	-2.070408499	0.054990196	0.253749895	-4.481991098	non
PC(18:2(9Z,12Z)/18:3(9Z,12Z,15Z))	-0.187958883	10.21858588	-2.470382029	0.02515332	0.169586834	-4.49098295	non
PE(20:1(11Z)/16:1(9Z))	-0.526045699	5.195840239	-2.363233243	0.031140269	0.187483033	-4.492848102	down
PC(16:0/22:5(7Z,10Z,13Z,16Z,19Z))	-0.553523679	4.641788804	-2.30599469	0.034864213	0.198651436	-4.509621768	down
Cytidine	0.280680581	8.322975637	2.446903834	0.026363802	0.174905308	-4.509745885	non
GlcCer(d18:1/22:0)	-0.614655741	5.401379911	-2.365468123	0.031002729	0.187483033	-4.514061621	down
(2E)-3-[3-(sulfooxy)phenyl]prop-2-enoic acid	0.260545771	5.413494066	2.366522939	0.030938011	0.187483033	-4.516006546	non
Prostaglandin B2	0.48589729	7.280407562	2.441904678	0.026628569	0.175934844	-4.521550917	non
PC(14:0/20:1(11Z))	-0.295455903	4.167003238	-2.240971234	0.039597989	0.214218736	-4.527671414	non
PC(P-18:0/14:1(9Z))	-1.371321483	0.297158534	-1.592658557	0.130840277	0.381715742	-4.528419525	non
2,4-Dichlorophenol	-0.786670016	5.514919969	-2.363852214	0.031102119	0.187483033	-4.528469761	down
2,4,6-trihydroxybenzaldehyde	0.298601908	5.180154314	2.337845726	0.032743433	0.192444781	-4.536803634	non
PC(20:4(8Z,11Z,14Z,17Z)/P-16:0)	0.295386539	5.260991414	2.341381073	0.032515635	0.192444781	-4.54095421	non
DG(20:4(8Z,11Z,14Z,17Z)/20:1(11Z)/0:0)	-0.454919508	4.632801328	-2.286135761	0.0362508	0.203498811	-4.547731041	non
DG(18:2(9Z,12Z)/18:1(11Z)/0:0)	-0.840701758	3.53003425	-2.093590237	0.052616583	0.250246523	-4.550089785	non
DG(16:1(9Z)/20:2(11Z,14Z)/0:0)	-0.543185881	4.056607706	-2.202156983	0.04270176	0.22611544	-4.55177278	down
Deoxycytidine	-0.543146385	6.314327931	-2.395582262	0.029204254	0.183872273	-4.559064083	down
DG(14:1(9Z)/18:2(9Z,12Z)/0:0)	-0.543994587	5.924648394	-2.374279682	0.030465985	0.187406664	-4.560668035	down
Protocatechuic acid	-0.587024388	5.481537895	-2.340397499	0.032578861	0.192444781	-4.569927628	down
Dimethyltryptamine	0.440578435	7.831351206	2.41287933	0.028216141	0.180842372	-4.573150341	non
PC(20:1(11Z)/22:5(4Z,7Z,10Z,13Z,16Z))	0.310762035	5.968764842	2.36756399	0.030874262	0.187483033	-4.582388219	non
PE(20:2(11Z,14Z)/P-16:0)	-1.44464126	4.067753935	-2.140070131	0.048137787	0.236708168	-4.583183376	down
Amitriptyline	0.542527134	8.102670553	2.404143052	0.028711203	0.182131332	-4.58909488	up
N-Phenylacetylphenylalanine	-0.339274741	3.849308118	-2.148980294	0.047320301	0.234846194	-4.590512588	non
19-Norandrosterone	-0.734361355	7.945345109	-2.402341597	0.0288143	0.182131332	-4.594532773	down
3,6-octadienoylglycine	0.345244654	7.235885206	2.403067639	0.028772707	0.182131332	-4.594712609	non
PC(20:2(11Z,14Z)/P-18:1(11Z))	0.442796968	4.520016503	2.252171726	0.038742089	0.211405989	-4.594992879	non
MG(0:0/20:5(5Z,8Z,11Z,14Z,17Z)/0:0)	-0.710790534	5.655350949	-2.336303549	0.03284327	0.192444781	-4.596049426	down
Lenalidomide	0.663954313	8.291888128	2.399011452	0.029005803	0.182981595	-4.599215219	up
FAPy-adenine	-0.444297588	5.839010841	-2.348349582	0.032070968	0.19105729	-4.600331457	non
Leukotriene B5	0.73616973	5.309309962	2.306118636	0.034855716	0.198651436	-4.6118882	up
3,4,5-Trimethoxycinnamic acid	-0.321793944	9.396754764	-2.39457589	0.029262736	0.183879932	-4.612756851	non
Warfarin	0.214924658	5.457355892	2.315488925	0.034218967	0.197488704	-4.615932333	non
Dityrosine	-0.580548991	4.974828794	-2.277789415	0.036848781	0.2047951	-4.616666662	down
Phosphocreatine	-0.257712048	5.473492695	-2.311098001	0.034515981	0.198621533	-4.625299908	non
Carprofen	-0.573574551	8.21096417	-2.383497982	0.029913825	0.186523402	-4.628259023	down
Penciclovir	0.359932646	8.483975574	2.382856883	0.029951919	0.186523402	-4.630223233	non
PG(18:1(9Z)/20:3(5Z,8Z,11Z))	0.940808704	6.4914228	2.362848988	0.031163975	0.187483033	-4.630611365	up
PG(18:3(6Z,9Z,12Z)/18:1(9Z))	1.68979792	5.261292381	2.280150263	0.03667871	0.204777373	-4.633149962	up
PEP-16:0/18:1(11Z))	0.271813316	5.375517184	2.297235571	0.035469569	0.20051547	-4.637428334	non
PC(20:4(8Z,11Z,14Z,17Z)/18:1(9Z))	0.43546352	7.165986967	2.378677981	0.03020135	0.186960977	-4.638443778	non
PE(20:0/16:1(9Z))	-0.580437907	7.274290513	-2.376045677	0.030359468	0.18710989	-4.640915167	down
Deoxycholic acid 3-glucuronide	-0.547879193	6.231947415	-2.34699479	0.03215697	0.191214869	-4.641752013	down
PC(20:3(5Z,8Z,11Z)/P-16:0)	0.327687879	9.323296898	2.377911266	0.030247325	0.186960977	-4.64251931	non
Amoxapine	-0.608372668	5.849061125	-2.323510312	0.033682542	0.195224989	-4.64423412	down
Oleoylcarnitine	-0.462351245	3.449884877	-2.031828464	0.059157973	0.262370513	-4.64642083	non
PG(18:2(9Z,12Z)/18:3(9Z,12Z,15Z))	-1.233212939	1.13703772	-1.606471618	0.127765336	0.377108143	-4.647367282	non
11-trans-Leukotriene C4	0.261438681	5.085218546	2.269584103	0.037445612	0.207306655	-4.648728664	non
PC(16:0/20:4(5Z,8Z,11Z,14Z))	-0.842538488	4.930731976	-2.251487499	0.038793877	0.211405989	-4.651700982	down
PC(24:0/16:0)	0.1929642	4.076597325	2.159769359	0.046347548	0.233980739	-4.652324146	non
DG(18:1(11Z)/16:1(9Z)/0:0)	-0.231397006	6.785139813	-2.362604724	0.031179053	0.187483033	-4.655040134	non
DG(22:6(4Z,7Z,10Z,13Z,16Z,19Z)/18:0/0:0)	-0.742513502	3.333042955	-1.993301262	0.063604596	0.27360211	-4.65600409	non
Ergothioneine	0.451117194	4.303440765	2.188770677	0.043823437	0.228436782	-4.65814892	non
PC(20:3(8Z,11Z,14Z)/16:1(9Z))	-0.325815206	7.290889057	-2.366115466	0.030962996	0.187483033	-4.662229805	non
DG(14:1(9Z)/22:1(13Z)/0:0)	-0.160137963	13.27642685	-2.462714953	0.025542709	0.170514839	-4.667644956	non
PE(18:1(9Z)/18:1(9Z))	-0.461346745	6.085826997	-2.325673947	0.033539205	0.194941576	-4.668059176	non
Fosinopril	0.67111248	7.487175081	2.360192186	0.031328345	0.188028626	-4.67272648	up
Lycopene	1.548663495	6.322499114	2.325164036	0.033572934	0.194941576	-4.673293404	up
PC(P-16:0/20:0)	-1.133147021	0.492036217	-1.498489367	0.153517775	0.408518253	-4.67652199	non
MG(0:0/20:4(8Z,11Z,14Z,17Z)/0:0)	-0.717968773	6.879819526	-2.34931018	0.032010121	0.191049254	-4.677181372	down
Oxaliplatin	0.197504638	7.073992361	2.354435764	0.031687278	0.189828075	-4.682802502	non
6-hydroxyoct-4-enoylglycine	-0.279998678	6.401311047	-2.328613384	0.033345387	0.194323114	-4.691444317	non
PC(P-18:0/20:1(11Z))	-1.150864323	0.022624463	-1.423913146	0.173722852	0.431752382	-4.694209426	non
Docosahexaenoic acid	0.562015648	2.336521581	1.773047805	0.095296419	0.330807354	-4.701190174	non
DG(22:6(4Z,7Z,10Z,13Z,16Z,19Z)/22:6(4Z,7Z,10Z,13Z,16Z,19Z)/0:0)	-0.544141477	6.977920424	-2.339884117	0.032611908	0.192444781	-4.701213232	down
PC(18:2(9Z,12Z)/P-18:1(11Z))	-0.379177687	5.605723936	-2.276690809	0.036928173	0.2047951	-4.703816149	non
Cer(t18:0/16:0)	-1.202057343	-0.417347059	-1.366279462	0.19078806	0.451638131	-4.704557432	non
Prazosin	-0.525328535	9.565898233	-2.343242778	0.032396275	0.192281774	-4.710747644	down
3-(2,4-Dihydroxyphenyl)propanoic acid	-0.246891888	5.860307078	-2.290246969	0.03595959	0.202217587	-4.711596218	non
LysoPE(0:0/20:2(11Z,14Z))	0.90845654	4.082295271	2.108969841	0.051093978	0.246536032	-4.711689585	non
2,3-Dinor-6-keto-prostaglandin F1 a	0.722768566	4.673237173	2.196244977	0.043193828	0.227057029	-4.713822377	up
Trimethylsilyl n-pentadecanoic acid	0.224733399	6.178871571	2.305584085	0.034892373	0.198651436	-4.715724576	non
Heptaglutamyl folic acid	0.262467295	7.627891699	2.336424749	0.032835413	0.192444781	-4.716356251	non
PC(18:1(11Z)/P-18:1(11Z))	-0.741364738	2.907096388	-1.854975511	0.082161362	0.311785284	-4.736669799	non
DG(18:1(11Z)/20:5(5Z,8Z,11Z,14Z,17Z)/0:0)	-0.368884228	4.796783514	-2.19558742	0.043248881	0.227057029	-4.740025184	non
PC(P-16:0/22:6(4Z,7Z,10Z,13Z,16Z,19Z))	-1.33803509	0.90827582	-1.497627397	0.153739647	0.408518253	-4.742409911	non
PE(16:1(9Z)/20:1(11Z))	0.335912846	3.863430186	2.065821758	0.055471275	0.253749895	-4.744197385	non
Dicyclomine	1.920157451	0.992010059	1.499379427	0.153288952	0.408518253	-4.745528825	non
DG(22:5(7Z,10Z,13Z,16Z,19Z)/18:1(9Z)/0:0)	-0.48663223	4.252777867	-2.123306627	0.049711102	0.242001581	-4.749428916	non
PI(18:2(9Z,12Z)/20:2(11Z,14Z))	-0.747911722	1.503783792	-1.590459611	0.131335546	0.382337659	-4.753523502	non
Phenylalanylproline	-1.277429084	1.200078847	-1.526733856	0.146394006	0.401103667	-4.761841147	non
20alpha-Dihydroprogesterone	-0.293556747	12.28300187	-2.379272221	0.030165762	0.186960977	-4.76797851	non
gamma-CEHC	0.260106728	5.221450893	2.212266173	0.04187236	0.223714058	-4.768949217	non
Voriconazole	-0.211979969	6.217932568	-2.277380199	0.036878335	0.2047951	-4.769925842	non
PG(16:1(9Z)/22:5(4Z,7Z,10Z,13Z,16Z))	0.495618861	3.274240487	1.920816267	0.072797287	0.294027786	-4.7720079	non
DG(20:4(8Z,11Z,14Z,17Z)/18:0/0:0)	-0.464199477	5.840499586	-2.25082014	0.038844451	0.211405989	-4.777701706	non
14,15-DiHETrE	-0.442016161	4.043003078	-2.072392284	0.05478331	0.253749895	-4.778910993	non
Modafinil	-0.810566212	8.232266406	-2.300581348	0.035237187	0.199553101	-4.781290783	down
L-Iditol	0.383553916	5.615832217	2.233150367	0.040206013	0.216613269	-4.785747632	non
DG(16:0/20:1(11Z)/0:0)	0.320130418	4.457088687	2.138634624	0.0482707	0.236998804	-4.785846303	non
TG(16:0/16:1(9Z)/18:0)	0.272358572	5.796960881	2.241826452	0.039532021	0.214218736	-4.793380778	non
DG(18:0/14:1(9Z)/0:0)	-1.392590507	3.280346628	-1.866223813	0.080489324	0.309716467	-4.79522818	non
PG(18:1(9Z)/18:1(11Z))	1.295140097	6.000031344	2.237852163	0.039839446	0.214999094	-4.8061333	up
MG(0:0/18:4(6Z,9Z,12Z,15Z)/0:0)	-0.594138479	5.954604724	-2.240580897	0.039628131	0.214218736	-4.806968603	down
PE(22:1(13Z)/18:3(6Z,9Z,12Z))	-0.683256982	4.855768301	-2.156135797	0.046673077	0.233980739	-4.811322541	down
Tetradecanoylcarnitine	2.14780522	0.649830775	1.385495181	0.184953585	0.445118052	-4.81722865	non
Arachidonoylcarnitine	-0.37813576	6.064977851	-2.240851659	0.03960722	0.214218736	-4.820707339	non
PC(16:0/20:4(8Z,11Z,14Z,17Z))	1.051496981	4.329636198	2.078126685	0.054189268	0.253718214	-4.820790767	non
Decyl alcohol	0.273650174	4.831495397	2.154979419	0.046777117	0.233980739	-4.820921248	non
DG(20:4(5Z,8Z,11Z,14Z)/18:2(9Z,12Z)/0:0)	0.19883756	7.408037783	2.279681886	0.036712392	0.204777373	-4.822049149	non
12(S)-HPETE	2.083952427	1.397302471	1.49469914	0.154495381	0.408518253	-4.822491102	non
3-Aminosalicylic acid	0.317560541	4.145674401	2.068963861	0.055141304	0.253749895	-4.827927632	non
PC(18:2(9Z,12Z)/18:4(6Z,9Z,12Z,15Z))	1.222136132	1.32533356	1.496366921	0.154064577	0.408518253	-4.83161813	non
Cer(d18:0/18:0)	0.672202422	3.820918107	1.997938484	0.063053815	0.272131451	-4.832206204	non
PC(18:3(6Z,9Z,12Z)/20:0)	0.419587389	4.365881439	2.084865901	0.053498661	0.251882993	-4.855846973	non
Dextromethorphan	-2.207399651	0.057934641	-1.257158814	0.226777015	0.489599632	-4.863331654	non
6-Phosphogluconic acid	0.129364741	7.502287637	2.256425239	0.038421583	0.210723405	-4.863467505	non
PC(22:4(7Z,10Z,13Z,16Z)/18:1(11Z))	0.275610186	3.748603543	1.971812611	0.066214104	0.280863259	-4.864040751	non
PC(18:3(9Z,12Z,15Z)/14:0)	-0.29481638	11.59842184	-2.304264817	0.034982996	0.198814869	-4.868956476	non
Chloramphenicol	0.657281108	-0.674278184	1.165501004	0.260934544	0.521066895	-4.871398015	non
PI(18:2(9Z,12Z)/20:3(5Z,8Z,11Z))	0.481478046	3.281829926	1.860056645	0.081402276	0.310333306	-4.872241434	non
PC(18:0/18:4(6Z,9Z,12Z,15Z))	0.903556966	3.113522635	1.808667496	0.089374001	0.321951868	-4.87666242	non
PI(20:4(5Z,8Z,11Z,14Z)/18:1(11Z))	0.390703957	4.915081453	2.127411662	0.049321521	0.241052365	-4.879282386	non
O-Phosphothreonine	-1.058518093	0.61994737	-1.33611637	0.200244879	0.46450389	-4.887733295	non
2-Pentanamido-3-phenylpropanoic acid	-1.22240378	4.970967917	-2.112453112	0.050754786	0.246183713	-4.890040584	non
PC(18:2(9Z,12Z)/18:1(9Z))	-0.172646373	12.50801794	-2.319146235	0.033973403	0.196556029	-4.891237695	non
Grepafloxacin	0.149254165	10.36599808	2.255086985	0.038522155	0.210723405	-4.894554045	non
Lacto-N-fucopentaose-2	-0.539507539	5.633026545	-2.166940419	0.045711231	0.233980739	-4.900993137	down
4-Hydroxynonenal	0.448436988	6.146254396	2.198223694	0.043028554	0.226871409	-4.905653559	non
PC(20:2(11Z,14Z)/18:1(11Z))	0.223281956	7.713498008	2.230113379	0.040444449	0.217532873	-4.908354715	non
PE(16:1(9Z)/22:0)	0.176156779	4.381291737	2.057637369	0.056339241	0.255155575	-4.910965995	non
DG(20:0/20:4(5Z,8Z,11Z,14Z)/0:0)	0.452059654	3.84374944	1.960033378	0.067685176	0.283859465	-4.911744496	non
PC(18:3(6Z,9Z,12Z)/14:1(9Z))	-0.470784239	2.886324815	-1.740208012	0.101058879	0.339525898	-4.913568653	non
DG(24:0/14:0/0:0)	1.048510418	3.29547684	1.818623328	0.087777766	0.319338481	-4.914146676	non
Isomaltose	0.270096391	5.390825272	2.14211271	0.047949245	0.236183782	-4.916391603	non
PE(P-16:0/18:2(9Z,12Z))	0.310203215	6.481313814	2.207250367	0.042281994	0.225527383	-4.917854361	non
PI(16:0/18:1(9Z))	-0.991091341	1.604667996	-1.477139773	0.159092252	0.412971076	-4.918460842	non
MG(18:1(11Z)/0:0/0:0)	0.610270373	3.626351671	1.905658379	0.07486421	0.299850003	-4.918680064	non
PG(18:1(11Z)/18:1(9Z))	-0.331471551	4.885489299	-2.101468844	0.051831472	0.248034063	-4.918745275	non
PC(16:1(9Z)/20:3(5Z,8Z,11Z))	0.639612587	6.156974859	2.189895721	0.043728128	0.228310601	-4.920035477	up
2-[4-hydroxy-3-(sulfooxy)phenyl]acetic acid	-0.424943715	5.671750294	-2.159841588	0.046341099	0.233980739	-4.920041533	non
(3a,5b,7a)-23-Carboxy-7-hydroxy-24-norcholan-3-yl-b-D-Glucopyranosiduronic acid	0.173817177	4.891667972	2.102730006	0.051706797	0.248034063	-4.920088236	non
Bisnorbiotin	0.371111044	5.841598927	2.172178953	0.045251499	0.233605408	-4.921848974	non
alpha-Tocopherol	1.641558454	1.410557759	1.426975349	0.172852198	0.431154566	-4.925362398	non
Tetrahydrocurcumin	0.308035682	5.483992486	2.142410705	0.047921796	0.236183782	-4.928998599	non
PC(20:0/P-18:1(9Z))	0.627082096	3.179113991	1.794744608	0.091649202	0.325511847	-4.933852904	non
DG(20:3(8Z,11Z,14Z)/18:2(9Z,12Z)/0:0)	-0.789010569	7.300721974	-2.213041125	0.0418094	0.223714058	-4.934996179	down
PC(P-18:1(9Z)/24:1(15Z))	0.597161997	4.52111326	2.054944936	0.056627473	0.255380359	-4.935071931	non
Prostaglandin F1a	-0.497083122	4.930836637	-2.093877688	0.052587748	0.250246523	-4.936234291	non
alpha-CEHC	-0.281606761	5.83286476	-2.15858523	0.046453403	0.233980739	-4.943656307	non
MG(20:3(8Z,11Z,14Z)/0:0/0:0)	-0.193029867	4.834257593	-2.083810884	0.053606241	0.252019971	-4.943737015	non
PE(18:0/P-18:1(9Z))	0.399459503	5.083168009	2.101488983	0.051829479	0.248034063	-4.945837152	non
Cortisone	1.492853231	3.761962386	1.873264453	0.079458213	0.308263075	-4.946083881	non
PC(20:1(11Z)/16:1(9Z))	-0.221900798	6.566696796	-2.194422061	0.043346608	0.227057029	-4.946356445	non
1,5-octadienoylglycine	0.242231248	4.997176257	2.092923922	0.052683479	0.250246523	-4.94990605	non
PC(20:3(8Z,11Z,14Z)/22:1(13Z))	0.273522347	5.413010975	2.12421724	0.049624439	0.242001581	-4.950808938	non
Disialyllacto-N-tetraose	-0.471106412	2.926556198	-1.724454465	0.103929572	0.344376193	-4.950832028	non
PE(16:0/18:1(9Z))	0.600235201	5.512906907	2.129942704	0.049082717	0.240250919	-4.952572147	up
Pentobarbital	0.743332397	3.098497344	1.760075116	0.097537439	0.334008792	-4.953265519	non
PG(16:0/20:3(5Z,8Z,11Z))	-0.173127702	8.059383707	-2.203324065	0.042605237	0.22611544	-4.954677785	non
Fenoprofen	0.341222811	-0.8785941	1.03936742	0.314119706	0.569310329	-4.955388709	non
DG(18:0/18:1(11Z)/0:0)	-0.766530366	7.920470544	-2.202140737	0.042703105	0.22611544	-4.95958893	down
Arachidic acid	0.412603213	4.002674809	1.962420661	0.067384677	0.283859465	-4.960905274	non
Famotidine	-0.34312209	4.890755948	-2.075553325	0.054455118	0.253749895	-4.964003127	non
PC(20:3(5Z,8Z,11Z)/16:1(9Z))	0.215764868	3.164855835	1.776011273	0.094790864	0.330386714	-4.965229939	non
PC(16:1(9Z)/20:4(5Z,8Z,11Z,14Z))	0.172349706	4.300978818	2.012699071	0.061329273	0.267929655	-4.96743662	non
Lacto-N-fucopentaose V	0.762472521	4.711023994	2.051996574	0.056944644	0.256450563	-4.970128435	non
Betaxolol	1.26936177	6.332944324	2.164509408	0.045926036	0.233980739	-4.970707261	up
Atracurium	-0.443899815	4.727174359	-2.055339151	0.056585187	0.255380359	-4.970871412	non
Bleomycin	0.178351912	9.349686863	2.194519022	0.043338469	0.227057029	-4.975767878	non
3-hydroxyhexanoylglycine	-0.401092804	6.078091025	-2.153543359	0.046906618	0.233980739	-4.977019801	non
Protocatechuic acid 3-O-sulfate	0.456687527	3.599681087	1.865477901	0.080599258	0.309716467	-4.980002335	non
DG(16:1(9Z)/14:0/0:0)	-0.294813317	4.843851497	-2.058251469	0.056273688	0.255155575	-4.9876419	non
Galactitol	0.39586494	4.904156288	2.061031617	0.055977784	0.254595842	-4.992450646	non
PC(P-18:1(9Z)/16:0)	-1.003543017	0.230865375	-1.172050974	0.258370446	0.518841465	-4.994164701	non
Ursolic acid	-0.389745514	3.982210314	-1.934155251	0.071020857	0.291621446	-4.994312166	non
Glycerol 3-phosphate	0.180253784	8.118635164	2.180888188	0.044496616	0.231195198	-4.994348318	non
DG(14:1(9Z)/18:0/0:0)	0.372094884	5.28421452	2.088132062	0.053166862	0.251211024	-4.995340431	non
1,2-octadienoylglycine	0.249765414	6.470372708	2.161808959	0.04616574	0.233980739	-4.997790131	non
6-(4-carboxy-2-hydroxyphenoxy)-3,4,5-trihydroxyoxane-2-carboxylic acid	0.22676325	6.311488045	2.15331423	0.046927311	0.233980739	-4.999981512	non
PC(P-16:0/24:0)	-0.839492719	0.710672581	-1.251274971	0.228859645	0.489912214	-5.001345938	non
N-Octyl phenyl ketone	0.262491914	7.259284424	2.179641512	0.044603955	0.231378511	-5.001397702	non
Substance P	0.175082196	7.808400542	2.177227354	0.044812495	0.232085356	-5.001585843	non
Linoelaidic acid	-0.224855715	5.614784233	-2.110266121	0.050967507	0.246536032	-5.002015957	non
Dehydroepiandrosterone	-0.450064465	6.703731478	-2.164766363	0.045903288	0.233980739	-5.005755941	non
DG(16:1(9Z)/22:1(13Z)/0:0)	0.506258002	5.248943702	2.077978795	0.054204514	0.253718214	-5.008378357	non
PC(18:0/18:1(9Z))	1.034783471	0.957544394	1.288268555	0.216011001	0.479598663	-5.008815667	non
Glutaryl-CoA	1.082059005	4.567255679	2.000896683	0.062704717	0.272029751	-5.009633996	non
DG(22:1(13Z)/18:3(6Z,9Z,12Z)/0:0)	0.914142765	5.553668842	2.097460126	0.052229594	0.249567301	-5.01017154	non
DG(18:2(9Z,12Z)/20:1(11Z)/0:0)	-0.229647508	5.178447166	-2.069717003	0.055062479	0.253749895	-5.012996106	non
Phenylacetylglutamine	0.438479776	7.678093357	2.170068808	0.045436169	0.233806954	-5.015818446	non
6-hydroxyoct-5-enoylglycine	-1.21300309	4.954559826	-2.034577248	0.058851774	0.261555969	-5.020188908	non
PE(20:2(11Z,14Z)/20:2(11Z,14Z))	0.475669861	6.606057652	2.153760713	0.046886996	0.233980739	-5.020612905	non
PG(18:2(9Z,12Z)/20:3(5Z,8Z,11Z))	-0.246009731	4.653472667	-2.021675024	0.060301598	0.265608275	-5.021157825	non
Tramadol	1.23962158	6.354967171	2.135062657	0.048602894	0.238265483	-5.024991931	up
DG(18:0/20:4(8Z,11Z,14Z,17Z)/0:0)	-0.358379812	8.800710204	-2.165079162	0.045875609	0.233980739	-5.025461212	non
PC(18:2(9Z,12Z)/14:1(9Z))	-0.663142784	8.030283352	-2.164379476	0.045937543	0.233980739	-5.025865959	down
PE(22:2(13Z,16Z)/18:3(6Z,9Z,12Z))	-0.392827475	6.840826467	-2.157511825	0.046549552	0.233980739	-5.026450702	non
PC(P-18:1(11Z)/16:0)	-0.757745547	7.884330785	-2.163104343	0.046050613	0.233980739	-5.028777302	down
19-Noretiocholanolone	-0.382699586	9.410961	-2.164378327	0.045937645	0.233980739	-5.030554321	non
PC(20:5(5Z,8Z,11Z,14Z,17Z)/20:0)	0.405356668	3.217598576	1.743757457	0.100421711	0.338356889	-5.030809775	non
DG(18:3(6Z,9Z,12Z)/18:1(11Z)/0:0)	-0.388594358	10.89760475	-2.193138364	0.043454496	0.227251442	-5.031731738	non
Dodecanoylcarnitine	-0.594686612	5.203498309	-2.058579973	0.056238649	0.255155575	-5.035528893	non
gamma-Glutamylvaline	1.013910735	3.709531032	1.836026417	0.085047935	0.317104018	-5.036810537	non
PE(18:1(11Z)/18:1(9Z))	0.488073308	0.318377156	1.15030219	0.266958594	0.527185761	-5.039203645	non
L-3-Hydroxykynurenine	-0.526786123	3.414302992	-1.776817888	0.094653667	0.330386714	-5.040367882	non
Dofetilide	0.499561877	4.135810177	1.93180078	0.071331559	0.292311007	-5.049402864	non
20-Carboxy-leukotriene B4	-0.885141369	7.763077586	-2.151352997	0.047104777	0.234213597	-5.049469872	down
Tetracosanoic acid	-0.492871723	4.960222808	-2.029795445	0.05938537	0.26275814	-5.050437485	non
Clemastine	-0.529286404	10.0399463	-2.15731893	0.04656685	0.233980739	-5.057793002	down
PC(P-18:1(11Z)/20:4(5Z,8Z,11Z,14Z))	0.35851087	7.74264366	2.144969312	0.047686705	0.236183782	-5.059388442	non
PI(18:0/22:5(7Z,10Z,13Z,16Z,19Z))	-0.348741378	8.95075807	-2.144205103	0.047756811	0.236183782	-5.062759033	non
PC(14:1(9Z)/20:0)	-0.585685932	5.713070005	-2.0784422	0.054156754	0.253718214	-5.063978383	non
DG(14:0/18:3(9Z,12Z,15Z)/0:0)	-0.865023557	7.984612127	-2.142022137	0.047957591	0.236183782	-5.066248612	down
Remoxipride	0.133361192	6.187692211	2.108131964	0.051175878	0.246536032	-5.068379492	non
PC(P-18:0/22:1(13Z))	0.432930097	5.53330854	2.064552371	0.055605091	0.253749895	-5.069948623	non
PC(18:1(9Z)/20:3(5Z,8Z,11Z))	-0.838072073	0.785957554	-1.198728975	0.248124534	0.507903272	-5.071617848	non
PG(16:0/18:1(11Z))	0.183642505	6.614055575	2.122488872	0.049789047	0.242001581	-5.077358325	non
PC(P-18:1(9Z)/20:0)	-0.254619302	5.356685469	-2.044213449	0.057789705	0.259277461	-5.080707271	non
3-Hydroxyoctanoic acid	0.244870019	1.878968148	1.410336656	0.177626282	0.435720391	-5.082757511	non
2-hydroxyoct-3-enoylglycine	0.818531321	5.456739945	2.04908274	0.05725969	0.257508212	-5.083212692	non
Fluticasone propionate	0.319059448	-0.64059514	0.913540302	0.374548917	0.624048017	-5.086419923	non
Sotalol	-1.109319579	7.318954447	-2.122193737	0.049817205	0.242001581	-5.090717752	down
DG(18:3(9Z,12Z,15Z)/18:3(6Z,9Z,12Z)/0:0)	-0.956716961	2.730853194	-1.571619083	0.135644593	0.385887593	-5.09158009	non
PE(14:0/22:1(13Z))	0.173066913	5.374290389	2.037506357	0.058527075	0.260652479	-5.094723897	non
PC(20:3(5Z,8Z,11Z)/18:3(6Z,9Z,12Z))	1.043849744	1.103332638	1.236584617	0.234124514	0.495712934	-5.095054281	non
PG(18:1(9Z)/18:2(9Z,12Z))	1.221046932	4.007618576	1.834876098	0.085226025	0.317104018	-5.118018147	non
PG(18:1(9Z)/22:5(4Z,7Z,10Z,13Z,16Z))	-0.215454369	4.145506851	-1.889220551	0.077164852	0.304144481	-5.123993258	non
PC(20:2(11Z,14Z)/20:2(11Z,14Z))	0.180010306	7.711060536	2.107769799	0.051211315	0.246536032	-5.124562089	non
PC(24:0/18:1(9Z))	0.259240034	3.630971007	1.779342066	0.094225456	0.330386714	-5.131166205	non
DG(20:3(8Z,11Z,14Z)/18:3(9Z,12Z,15Z)/0:0)	-0.718781795	5.225815529	-2.001226181	0.062665942	0.272029751	-5.135266467	non
Delta-12-Prostaglandin J2	0.211533423	6.717070017	2.092950398	0.052680819	0.250246523	-5.13526786	non
PG(18:0/22:5(7Z,10Z,13Z,16Z,19Z))	-0.204100997	5.654637198	-2.034207684	0.058892858	0.261555969	-5.138261034	non
PI(18:3(6Z,9Z,12Z)/18:1(9Z))	-0.628423594	6.231945595	-2.066297701	0.055421178	0.253749895	-5.140763281	non
PC(18:0/22:5(7Z,10Z,13Z,16Z,19Z))	0.327947908	4.52974883	1.936507272	0.070711691	0.290953402	-5.143569566	non
PC(18:1(11Z)/P-16:0)	0.377420489	4.073466013	1.863749548	0.0808545	0.309813605	-5.144275431	non
PC(20:1(11Z)/20:4(8Z,11Z,14Z,17Z))	0.682073754	4.761055	1.955069056	0.068313928	0.285619822	-5.14476217	non
PI(16:1(9Z)/18:1(9Z))	-0.442494927	1.263150901	-1.228647822	0.237007864	0.497254398	-5.145984058	non
Cer(d18:1/24:0)	-0.354671689	3.608892545	-1.758131369	0.097877165	0.334431387	-5.147089803	non
Sulfamethizole	-0.415652874	3.763224581	-1.789638538	0.092496301	0.327098705	-5.151187048	non
TG(16:0/16:1(9Z)/16:1(9Z))	-0.348885609	2.878269589	-1.575539595	0.134738192	0.385257644	-5.15223269	non
Clonidine	-0.571401387	4.007575494	-1.834095902	0.085347002	0.317186601	-5.153321815	non
PG(18:2(9Z,12Z)/18:0)	-0.908197172	1.856957492	-1.336040664	0.200269079	0.46450389	-5.153803707	non
DG(16:1(9Z)/18:0/0:0)	-0.889656004	4.680910201	-1.92714676	0.071949309	0.292808306	-5.157630732	non
DG(22:2(13Z,16Z)/18:2(9Z,12Z)/0:0)	0.34682762	8.669069188	2.088759664	0.053103322	0.251211024	-5.15879807	non
3-Hydroxyhippuric acid	0.252815287	7.036059012	2.087365815	0.053244534	0.251211024	-5.159423833	non
TG(15:0/16:0/20:3(8Z,11Z,14Z))	-0.287818419	4.274634388	-1.887414146	0.077421488	0.304657351	-5.160340857	non
PC(18:2(9Z,12Z)/22:2(13Z,16Z))	-0.172604173	7.118211548	-2.087165476	0.053264858	0.251211024	-5.160960293	non
PC(P-18:1(11Z)/P-18:1(11Z))	0.308972045	7.243988633	2.087038892	0.053277704	0.251211024	-5.163361598	non
N-Acetylcystathionine	-1.11594225	5.551286093	-2.002918763	0.062467099	0.271791131	-5.165223921	non
Cetoleic acid	0.287931928	4.725054097	1.943009649	0.069863256	0.28908623	-5.166895143	non
5-cis-Lycopene	0.596687106	3.870242863	1.802112974	0.090438827	0.32338427	-5.168292363	non
DG(18:1(11Z)/18:2(9Z,12Z)/0:0)	-0.21883717	5.314868884	-1.987669566	0.064279345	0.274104883	-5.170659574	non
DG(22:5(7Z,10Z,13Z,16Z,19Z)/18:2(9Z,12Z)/0:0)	0.952448549	3.878913752	1.787244881	0.092895776	0.327962681	-5.172219541	non
Chenodeoxycholic acid 3-sulfate	-0.367081159	6.903167282	-2.074668847	0.054546767	0.253749895	-5.173906752	non
PC(18:1(9Z)/20:0)	0.207688525	-1.00544388	0.698684097	0.494802375	0.715036195	-5.17751855	non
Prolylglycine	-0.597134919	0.698377736	-1.077643776	0.29720708	0.552275424	-5.177784492	non
PC(20:1(11Z)/20:5(5Z,8Z,11Z,14Z,17Z))	-0.340969844	7.310761131	-2.076973593	0.054308245	0.253749895	-5.179522995	non
Lacto-N-tetraose	-0.190298265	6.201425209	-2.043985791	0.057814594	0.259277461	-5.179720537	non
PC(20:4(5Z,8Z,11Z,14Z)/16:1(9Z))	-0.432345231	6.783573817	-2.067005844	0.055346716	0.253749895	-5.180754624	non
TG(22:6(4Z,7Z,10Z,13Z,16Z,19Z)/22:6(4Z,7Z,10Z,13Z,16Z,19Z)/22:6(4Z,7Z,10Z,13Z,16Z,19Z))	-0.208307015	4.968382972	-1.953776001	0.06847856	0.285935833	-5.181318015	non
PG(18:2(9Z,12Z)/18:1(11Z))	-0.282206548	3.489612441	-1.708528034	0.106903656	0.349199218	-5.181815578	non
DG(20:3(8Z,11Z,14Z)/14:0/0:0)	-0.352914979	6.158708982	-2.039152984	0.058345258	0.260565541	-5.183277636	non
DG(18:3(9Z,12Z,15Z)/18:1(11Z)/0:0)	-0.223563933	6.754609578	-2.065404729	0.055515205	0.253749895	-5.184021387	non
Arachidyl carnitine	0.747212002	4.268096778	1.862430459	0.081049786	0.310016586	-5.184923775	non
DG(16:0/18:0/0:0)	-0.301674606	4.379126582	-1.885338753	0.077717279	0.30544698	-5.188924637	non
DG(20:4(5Z,8Z,11Z,14Z)/18:0/0:0)	0.620044329	4.311841451	1.870506756	0.079860672	0.308954962	-5.190998785	non
3-Indoleacetonitrile	-0.353170077	6.357738949	-2.042597123	0.057966625	0.259596698	-5.194495732	non
6-Hydroxymethyletoricoxib	0.109780501	9.549244884	2.070243029	0.055007485	0.253749895	-5.195921017	non
Sialyllacto-N-neotetraose c	0.707119105	5.552426119	1.989912058	0.064009894	0.27360211	-5.196210318	non
PE(18:3(6Z,9Z,12Z)/22:1(13Z))	0.373439979	3.245158503	1.639383577	0.120686146	0.368018249	-5.19636923	non
PG(16:1(9Z)/18:1(9Z))	-0.244164008	5.955318128	-2.019393368	0.060561338	0.266022511	-5.197737971	non
DG(18:2(9Z,12Z)/22:2(13Z,16Z)/0:0)	0.265769677	7.799988419	2.064160715	0.055646438	0.253749895	-5.199131884	non
DG(18:0/18:1(9Z)/0:0)	0.818948141	1.717594466	1.274067067	0.220874648	0.483784786	-5.199551239	non
PC(16:1(9Z)/18:0)	-0.231056877	4.964349462	-1.941257907	0.070090919	0.289655009	-5.201393984	non
15(S)-HPETE	0.295888086	9.33776744	2.064052037	0.055657916	0.253749895	-5.204001445	non
PC(22:1(13Z)/18:0)	0.225097705	6.08328178	2.023042886	0.060146369	0.265288449	-5.205246724	non
2,7-octadienoylglycine	0.278444609	5.921910609	2.013144776	0.061277871	0.267929655	-5.206149282	non
Diatrizoate	0.492439913	4.970239012	1.937550421	0.07057496	0.290906541	-5.208124931	non
TG(16:0/16:1(9Z)/20:0)	-0.398506929	4.187026339	-1.838299049	0.084697058	0.316603322	-5.209659937	non
PG(18:1(9Z)/16:0)	1.214421385	5.131573126	1.944990331	0.069606639	0.288582272	-5.210978109	non
TG(16:1(9Z)/20:4(5Z,8Z,11Z,14Z)/20:4(5Z,8Z,11Z,14Z))	0.117604414	5.01169808	1.938078519	0.07050583	0.290906541	-5.213254226	non
DG(14:0/20:3(8Z,11Z,14Z)/0:0)	0.256447605	7.016126004	2.05512425	0.056608235	0.255380359	-5.214351875	non
PE(18:3(6Z,9Z,12Z)/22:2(13Z,16Z))	-0.369128654	3.540081613	-1.690506041	0.110357893	0.353981149	-5.22391634	non
PC(14:0/22:4(7Z,10Z,13Z,16Z))	0.131808008	3.996921626	1.798833577	0.090975772	0.324581339	-5.227085697	non
PC(16:1(9Z)/20:4(8Z,11Z,14Z,17Z))	-0.464925702	5.454292682	-1.960253828	0.067657377	0.283859465	-5.233998896	non
Prolylphenylalanine	-0.821792283	0.794037067	-1.031749865	0.317566897	0.572022819	-5.236117539	non
TG(20:0/20:0/20:1(11Z))	0.172711538	5.838391354	1.989876984	0.064014101	0.27360211	-5.236797116	non
para-Trifluoromethylphenol	-1.874829026	2.769609117	-1.425628856	0.173234595	0.431154566	-5.240613769	non
TG(18:2(9Z,12Z)/20:0/20:1(11Z))	0.200105597	6.956529682	2.038404108	0.058427884	0.260572131	-5.241053193	non
PC(P-18:1(9Z)/20:3(5Z,8Z,11Z))	0.178353139	6.269131121	2.009640264	0.061683095	0.26874412	-5.244407397	non
Isoetharine	0.140336038	5.42453882	1.950272219	0.068926458	0.286687638	-5.248668177	non
PE(20:2(11Z,14Z)/P-18:0)	-1.257968352	4.657968526	-1.85266493	0.082508621	0.312055574	-5.248701653	non
PC(16:0/18:4(6Z,9Z,12Z,15Z))	-0.633673379	3.553018953	-1.66760967	0.114885337	0.35815225	-5.249162859	non
3-(3-Hydroxyphenyl)-3-hydroxypropanoic acid	0.257696304	12.08734896	2.104199634	0.05156186	0.247851996	-5.252709521	non
4-Pyridoxic acid	0.177749807	9.192659092	2.029584284	0.059409035	0.26275814	-5.261644231	non
PC(P-16:0/18:1(9Z))	0.672037196	1.429766226	1.154478191	0.265293077	0.526328346	-5.262596609	non
DG(16:1(9Z)/22:2(13Z,16Z)/0:0)	0.309181641	4.262664779	1.824389599	0.086864813	0.318562679	-5.263168098	non
Testosterone	-0.148053053	6.150228581	-1.991131538	0.063863794	0.27360211	-5.26489937	non
Trihexosylceramide (d18:1/20:0)	0.434746371	6.647283048	2.013070208	0.061286468	0.267929655	-5.266696302	non
Sialyllacto-N-tetraose c	0.343990115	5.91843183	1.976112017	0.06568439	0.278984891	-5.267700043	non
Taurohyocholate	0.172311014	7.135249778	2.025026366	0.059921921	0.264662022	-5.268928068	non
Cefmenoxime	0.375278021	11.09907654	2.063533029	0.055712761	0.253749895	-5.269249624	non
CL(i-14:0/i-17:0/a-17:0/i-13:0)[rac]	-0.975514354	5.888186379	-1.961106549	0.067549942	0.283859465	-5.275657729	non
1-hydroxyoct-6-enoylglycine	0.288961003	8.035331108	2.014948587	0.06107024	0.267891451	-5.282188795	non
Nervonic acid	0.112579546	12.76632091	2.108036598	0.051185207	0.246536032	-5.283422851	non
Dehydroascorbic acid	0.599071477	3.580689413	1.659668159	0.116492639	0.360017194	-5.284639337	non
6-[4-(4-carboxy-2-hydroxybutyl)-2-hydroxyphenoxy]-3,4,5-trihydroxyoxane-2-carboxylic acid	0.391303544	4.096820517	1.777926132	0.094465451	0.330386714	-5.2864362	non
DG(18:3(6Z,9Z,12Z)/18:3(9Z,12Z,15Z)/0:0)	-0.736387791	5.47343331	-1.928499803	0.07176922	0.292450465	-5.286441774	non
PC(18:1(11Z)/20:4(8Z,11Z,14Z,17Z))	0.160046562	3.840968436	1.725934945	0.1036568	0.344200606	-5.287372068	non
Docosapentaenoic acid (22n-3)	0.702845909	1.331628602	1.107734552	0.284386986	0.539770956	-5.287689198	non
PC(24:1(15Z)/18:1(11Z))	-0.740963328	2.065421797	-1.2678269	0.223038783	0.48521513	-5.292302127	non
PC(18:3(6Z,9Z,12Z)/20:3(5Z,8Z,11Z))	-0.840145811	6.622108792	-1.991644708	0.063802404	0.27360211	-5.293493813	non
PE(P-18:1(11Z)/18:1(9Z))	0.276834336	7.172910207	2.010299342	0.061606701	0.26874412	-5.294139216	non
Methyldopa	-0.155660522	5.190210452	-1.902082727	0.075359375	0.299850003	-5.295192167	non
DG(16:1(9Z)/22:5(4Z,7Z,10Z,13Z,16Z)/0:0)	-0.375905797	5.916487519	-1.956758587	0.068099354	0.285093906	-5.297378982	non
GlcCer(d18:1/26:0)	-0.385154951	3.716994983	-1.682649318	0.111893761	0.353981149	-5.29857427	non
Guanosine monophosphate	0.202383479	5.839710354	1.952211301	0.068678255	0.286397243	-5.299785704	non
DG(20:5(5Z,8Z,11Z,14Z,17Z)/20:0/0:0)	-0.341077404	6.176566695	-1.970171176	0.066417353	0.281353722	-5.301467102	non
6-(3-carboxy-4-hydroxyphenoxy)-3,4,5-trihydroxyoxane-2-carboxylic acid	-0.695680095	2.436248528	-1.34884247	0.196210112	0.460212322	-5.302004282	non
DG(20:3(8Z,11Z,14Z)/20:2(11Z,14Z)/0:0)	0.230939725	5.58506938	1.930745052	0.071471272	0.292311007	-5.303670475	non
PC(22:2(13Z,16Z)/18:4(6Z,9Z,12Z,15Z))	0.206192901	5.289307804	1.904010591	0.075092037	0.299850003	-5.305289562	non
6-[3-(2-carboxyethyl)-5-hydroxyphenoxy]-3,4,5-trihydroxyoxane-2-carboxylic acid	-0.347079711	-0.690189887	-0.533378079	0.601119197	0.792036824	-5.30579808	non
PC(18:1(9Z)/16:0)	-0.270619114	3.785376504	-1.696339126	0.109229446	0.352852868	-5.307159235	non
PC(18:0/18:2(9Z,12Z))	-0.223899938	6.115911609	-1.963185311	0.067288681	0.283859465	-5.308262815	non
6-nonenoylglycine	0.343390828	4.368226397	1.812054311	0.088828136	0.321078775	-5.30867988	non
Shikimic acid	0.278204211	7.747691215	2.000014375	0.062808655	0.272029751	-5.308949769	non
Perfluorohexane sulfonic acid	-0.619893616	3.882605489	-1.705126374	0.107548371	0.349886343	-5.309351693	non
Homovanillic acid	0.510680312	8.424061293	1.999330304	0.062889347	0.272029751	-5.310452947	non
Homogentisic acid	0.344647714	7.645265704	1.998854461	0.062945533	0.272029751	-5.312052413	non
CE(20:2(6Z,9Z))	-0.252132125	6.156871627	-1.962821229	0.067334374	0.283859465	-5.312494611	non
DG(20:4(5Z,8Z,11Z,14Z)/20:3(8Z,11Z,14Z)/0:0)	0.229452443	4.641533724	1.844036412	0.083816955	0.314730996	-5.315079827	non
DG(20:3(8Z,11Z,14Z)/16:1(9Z)/0:0)	0.618737329	3.27122743	1.557951685	0.138844851	0.389974528	-5.31595344	non
Acetazolamide	-1.301226421	2.917096755	-1.433885173	0.17090071	0.429727628	-5.317357326	non
Triamterene	-0.160956731	6.205030007	-1.960647679	0.067607736	0.283859465	-5.320758194	non
Lipoxin A4	0.764838996	7.254903423	1.991314514	0.063841899	0.27360211	-5.322658408	non
Montelukast	0.112236854	-0.969197462	0.370172865	0.716118653	0.860338896	-5.323799952	non
PC(18:1(9Z)/18:4(6Z,9Z,12Z,15Z))	-1.059560837	2.018726885	-1.22109238	0.239778153	0.500603153	-5.324622071	non
PC(18:0/22:5(4Z,7Z,10Z,13Z,16Z))	0.24076064	8.743148084	1.989696051	0.064035804	0.27360211	-5.328093794	non
PE(18:3(9Z,12Z,15Z)/22:2(13Z,16Z))	0.109793761	5.761734778	1.928855513	0.071721943	0.292450465	-5.329635264	non
Norepinephrine sulfate	0.884964447	5.220398087	1.882262607	0.078157554	0.305790318	-5.331342907	non
PE(20:3(5Z,8Z,11Z)/20:2(11Z,14Z))	0.196123729	11.60612056	2.040192481	0.058230744	0.260416322	-5.336954889	non
PG(18:0/22:6(4Z,7Z,10Z,13Z,16Z,19Z))	-0.19684773	8.00207053	-1.981295316	0.065050864	0.276660032	-5.339260347	non
6-hydroxyoct-2-enoylglycine	-0.468665964	3.17292821	-1.511618169	0.150171262	0.405550818	-5.341361388	non
Epicatechin	0.717755625	8.807096068	1.981730968	0.064997869	0.276660032	-5.341470265	non
Trihexosylceramide (d18:1/25:0)	0.126707926	9.928277283	1.989359158	0.064076234	0.27360211	-5.341793798	non
Lactodifucotetraose	0.24465932	4.992564982	1.857284694	0.08181561	0.310913897	-5.342456981	non
2-hydroxyoct-6-enoylglycine	0.691238419	3.698416426	1.644376795	0.119642039	0.366678563	-5.34358928	non
GlcCer(d18:1/24:1(15Z))	-0.433575862	3.54564405	-1.607819654	0.127468571	0.377038667	-5.343628147	non
Oxiconazole	0.622377582	4.976170564	1.853818191	0.082335134	0.311785284	-5.344462349	non
Heptyl cyclohexane carboxylic acid	-0.598107922	1.308816766	-1.040114632	0.313783026	0.569241411	-5.345854746	non
PC(22:5(4Z,7Z,10Z,13Z,16Z)/P-16:0)	0.361896442	2.069949615	1.230020342	0.236507285	0.497254398	-5.34601596	non
2-hydroxyoct-2-enoylglycine	-0.17807709	4.104110476	-1.740045106	0.101088207	0.339525898	-5.347655055	non
DG(20:3(8Z,11Z,14Z)/20:3(5Z,8Z,11Z)/0:0)	0.653884443	4.787367974	1.832709423	0.085562364	0.317252598	-5.348465597	non
Vaccenic acid	0.257820493	5.059224723	1.857259023	0.081819446	0.310913897	-5.350742063	non
PC(18:2(9Z,12Z)/20:4(8Z,11Z,14Z,17Z))	0.181742302	4.738426776	1.828742005	0.086181283	0.317359279	-5.355038361	non
DG(18:0/20:4(5Z,8Z,11Z,14Z)/0:0)	-0.554304928	4.348907859	-1.767562784	0.096238383	0.332212738	-5.355740126	non
Epigallocatechin gallate	0.186955799	3.804173861	1.671659576	0.11407305	0.357354695	-5.356192212	non
PG(18:1(11Z)/18:1(11Z))	-0.189983495	3.905984359	-1.692269036	0.110015771	0.353968579	-5.356732329	non
PC(20:1(11Z)/14:0)	1.046107488	2.454496722	1.305963226	0.210069735	0.476452315	-5.357688077	non
DG(18:1(11Z)/20:3(5Z,8Z,11Z)/0:0)	0.15795269	3.794854075	1.665632618	0.115283681	0.358350338	-5.362090767	non
PE(18:0/22:5(4Z,7Z,10Z,13Z,16Z))	0.231533292	3.256328601	1.525695962	0.146650796	0.401103667	-5.363847858	non
PE(20:5(5Z,8Z,11Z,14Z,17Z)/20:0)	-0.324236636	4.126741206	-1.729590553	0.10298594	0.343037193	-5.365334403	non
Succinylcholine	-0.598731189	5.772755837	-1.902714706	0.075271644	0.299850003	-5.36640376	non
PE(20:3(8Z,11Z,14Z)/P-18:0)	0.887047544	2.410672798	1.286409212	0.216642932	0.479752038	-5.369686241	non
7a-Hydroxy-cholestene-3-one	0.208975537	3.960751052	1.696860543	0.109129063	0.352852868	-5.371333153	non
Donepezil metabolite M4	0.135389244	6.124975776	1.924483337	0.072304993	0.293156657	-5.373876716	non
DG(22:2(13Z,16Z)/18:3(9Z,12Z,15Z)/0:0)	-0.284662455	8.340834992	-1.959788364	0.067716085	0.283859465	-5.376437658	non
Carbidopa	-0.803564663	4.79303327	-1.803514301	0.090210237	0.323042216	-5.383256076	non
Levallorphan	-1.897055106	3.144525194	-1.398964639	0.180950711	0.440176313	-5.385214491	non
Pyridostigmine	-1.299610686	5.310012629	-1.845889495	0.083534432	0.314453764	-5.390279099	non
PE(15:0/18:1(9Z))	0.22891763	3.983451982	1.688315436	0.110784278	0.353981149	-5.391298823	non
DG(18:4(6Z,9Z,12Z,15Z)/22:0/0:0)	-0.126920078	5.210423549	-1.844085093	0.083809522	0.314730996	-5.391534518	non
SM(d18:1/24:0)	-0.371543381	4.169708356	-1.718887333	0.104960888	0.345060928	-5.392070764	non
TG(18:0/18:0/20:0)	0.640568162	7.523345775	1.950722294	0.068868776	0.286687638	-5.393133551	non
SM(d19:1/24:1(15Z))	0.516212545	3.091420804	1.451020787	0.16613919	0.422051376	-5.397732379	non
3-Methyl-2-undecene (Z)	0.413482739	8.224703604	1.944642893	0.069651592	0.288582272	-5.40094176	non
PI(22:5(7Z,10Z,13Z,16Z,19Z)/16:0)	0.247695791	6.140298844	1.907159936	0.07465714	0.299655096	-5.403637886	non
2-[3-(sulfooxy)phenyl]acetic acid	-0.907685071	1.95268095	-1.136287313	0.272605753	0.533159456	-5.403841388	non
14R,15S-EpETrE	0.298513482	4.90988092	1.811643916	0.088894124	0.321078775	-5.404646467	non
1-hydroxyhexanoylglycine	-0.632010606	0.77278799	-0.827665354	0.420060325	0.664113099	-5.405047307	non
DG(20:3(5Z,8Z,11Z)/14:0/0:0)	-0.579746029	2.838986511	-1.369218064	0.189886304	0.450313828	-5.40657144	non
Roxithromycin	-0.861256323	3.045876144	-1.41491575	0.176301801	0.434462843	-5.406641867	non
TG(18:0/18:1(9Z)/20:0)	0.22868923	5.87681294	1.888997959	0.077196435	0.304144481	-5.407756125	non
DG(18:3(9Z,12Z,15Z)/20:0/0:0)	-0.490798824	1.458277056	-1.01122302	0.326990944	0.578494723	-5.410565639	non
PC(20:4(5Z,8Z,11Z,14Z)/14:0)	0.17124459	6.547630347	1.922900123	0.072517168	0.29363509	-5.411572933	non
3,4-Dihydroxybenzeneacetic acid	0.337691734	3.382106835	1.523975305	0.147077342	0.401395436	-5.412115503	non
PI(16:0/22:5(7Z,10Z,13Z,16Z,19Z))	-0.87916619	2.991248401	-1.394779161	0.182186945	0.442178595	-5.413623983	non
PI(16:1(9Z)/18:0)	0.428802214	3.645192732	1.589754346	0.13149473	0.382454327	-5.414815822	non
PC(22:5(7Z,10Z,13Z,16Z,19Z)/20:1(11Z))	0.258610516	6.725514679	1.926470916	0.072039415	0.292808306	-5.4173105	non
PC(P-16:0/14:0)	-0.386327575	4.653699451	-1.773292408	0.095254601	0.330807354	-5.420878718	non
Brimonidine	0.114143253	10.16910057	1.946363478	0.069429232	0.288405258	-5.422091932	non
MG(0:0/18:3(6Z,9Z,12Z)/0:0)	-0.404790437	7.900687816	-1.930211361	0.071541993	0.292311007	-5.425399574	non
2-Fucosyllactose	-0.127181309	4.737229242	-1.781279854	0.093897878	0.330236676	-5.4281754	non
Sulfadiazine	0.210499802	3.003158327	1.40379444	0.179532658	0.438578069	-5.431624536	non
TG(22:5(7Z,10Z,13Z,16Z,19Z)/18:3(9Z,12Z,15Z)/22:6(4Z,7Z,10Z,13Z,16Z,19Z))	0.545589673	0.277468614	0.632862689	0.535783632	0.7452467	-5.433442585	non
3-Methylsulfinylpropyl isothiocyanate	-0.459619077	3.935522794	-1.6396684	0.120626379	0.368018249	-5.434411712	non
PI(20:3(5Z,8Z,11Z)/18:1(9Z))	0.275951343	4.73108981	1.775566628	0.094866568	0.330386714	-5.436792638	non
5'-O-Desmethyl omeprazole	0.186094969	14.09284139	2.065922952	0.05546062	0.253749895	-5.436853731	non
PC(22:4(7Z,10Z,13Z,16Z)/20:1(11Z))	0.202155841	4.431909275	1.740747934	0.10096173	0.339525898	-5.436996791	non
PE(18:3(9Z,12Z,15Z)/22:1(13Z))	0.384509281	6.276981084	1.893714872	0.076529636	0.303004514	-5.437236957	non
Octadecenoylcarnitine	-0.238447335	3.664816733	-1.578362825	0.134088658	0.384937927	-5.437879421	non
Ranolazine	0.192488268	6.507641959	1.904270898	0.075056005	0.299850003	-5.439198481	non
TG(16:1(9Z)/16:1(9Z)/20:1(11Z))	-0.230200333	5.918549548	-1.869314631	0.080035212	0.309257601	-5.442685106	non
DG(20:2(11Z,14Z)/20:3(8Z,11Z,14Z)/0:0)	-0.242043968	6.119087298	-1.881135678	0.078319403	0.305790318	-5.443493827	non
L-Fucose	0.17872932	8.300737696	1.917601175	0.073231375	0.295038826	-5.446008834	non
Medrysone	0.392059392	2.982680571	1.385135211	0.185061538	0.445118052	-5.446173655	non
Milrinone	0.43434884	4.609544177	1.755018205	0.098423439	0.334431387	-5.446175139	non
Erlotinib	0.11968068	-0.171171082	0.419875793	0.680172267	0.840720363	-5.446736576	non
DG(18:1(9Z)/20:0/0:0)	-0.347730594	7.238435221	-1.916808941	0.073338694	0.295100935	-5.448851724	non
Melibiose	0.21425188	4.842547879	1.776693107	0.09467488	0.330386714	-5.451120378	non
PC(18:3(9Z,12Z,15Z)/18:1(11Z))	-0.153900057	10.5053491	-1.936081624	0.070767551	0.290953402	-5.454037416	non
PC(24:1(15Z)/16:0)	0.239890394	4.70407803	1.759883251	0.097570927	0.334008792	-5.457411822	non
7-Dehydrocholesterol	-0.095806506	7.639701498	-1.910454863	0.074204553	0.298211289	-5.459196253	non
PC(22:2(13Z,16Z)/18:1(11Z))	0.359649362	4.794359542	1.763460906	0.096948139	0.332941684	-5.464080396	non
PC(20:4(8Z,11Z,14Z,17Z)/P-18:1(9Z))	0.294646876	7.805900467	1.904240616	0.075060196	0.299850003	-5.467683958	non
LysoPA(0:0/16:0)	0.309904336	4.322246474	1.702122834	0.108120433	0.350327658	-5.467904091	non
PE(18:1(11Z)/22:4(7Z,10Z,13Z,16Z))	0.147553416	4.650529681	1.747497721	0.099754088	0.337524105	-5.468522439	non
PG(18:3(6Z,9Z,12Z)/22:4(7Z,10Z,13Z,16Z))	0.973547856	3.51026105	1.494549234	0.154534152	0.408518253	-5.469313004	non
Arachidyl alcohol	-1.231039106	4.524254618	-1.687532823	0.110936953	0.353981149	-5.471741878	non
PE(20:1(11Z)/20:3(8Z,11Z,14Z))	-0.337418618	3.574931431	-1.527792644	0.146132436	0.401052352	-5.472457142	non
Cortol	1.442308928	2.24841793	1.139565899	0.271276711	0.532858534	-5.472842376	non
4-Ethylbenzoic acid	-0.446895856	5.992409944	-1.851887652	0.082625731	0.312130852	-5.476246137	non
3-octenoylglycine	-0.331673088	0.862617391	-0.759730165	0.458488325	0.69150118	-5.478513346	non
LysoPE(18:1(9Z)/0:0)	0.229111608	6.529991093	1.880747588	0.078375209	0.305790318	-5.479141944	non
DG(22:5(4Z,7Z,10Z,13Z,16Z)/18:1(9Z)/0:0)	-0.238034408	5.213359745	-1.785887558	0.093122971	0.328230362	-5.484380067	non
DG(20:3(5Z,8Z,11Z)/18:0/0:0)	-0.336556861	8.697659336	-1.89499075	0.076350159	0.303004514	-5.484721959	non
5,6-Epoxy-8,11,14-eicosatrienoic acid	0.255715294	4.749053768	1.746159929	0.099992432	0.337619031	-5.485368765	non
PI(18:1(11Z)/20:4(5Z,8Z,11Z,14Z))	0.269659536	5.561076575	1.815890483	0.088213402	0.319338481	-5.485963583	non
LysoPE(0:0/16:0)	0.340150306	6.525415344	1.875451541	0.079140314	0.308023695	-5.48701101	non
PC(20:3(5Z,8Z,11Z)/22:1(13Z))	0.232011445	9.898029545	1.901331032	0.075463843	0.29989406	-5.487138945	non
DG(24:1(15Z)/24:1(15Z)/0:0)	-0.254546507	9.114071687	-1.893978328	0.076492545	0.303004514	-5.487678678	non
2,3-Diphosphoglyceric acid	0.182777797	4.534043387	1.720487502	0.104663547	0.34469195	-5.488957677	non
PI(18:1(11Z)/18:1(11Z))	0.163004161	7.808078423	1.890254118	0.077018355	0.304144481	-5.490360374	non
2-Oxoarginine	0.106736845	6.740007811	1.880741881	0.07837603	0.305790318	-5.493250444	non
PC(22:2(13Z,16Z)/18:3(6Z,9Z,12Z))	-0.217425608	6.74197939	-1.87980155	0.078511395	0.305946709	-5.493832941	non
Pramipexole	0.234241322	4.328883169	1.686688676	0.111101836	0.353981149	-5.494154862	non
PC(18:0/P-18:0)	-0.216032799	10.1735503	-1.902576958	0.075290759	0.299850003	-5.49486699	non
O-Desmethylverapamil (D-703)	1.637096794	6.378034662	1.849504341	0.082985739	0.31275494	-5.49580229	non
Uridine 2',3'-cyclic phosphate	0.480033326	3.485097334	1.487182788	0.156449388	0.410661458	-5.497509394	non
DG(22:5(7Z,10Z,13Z,16Z,19Z)/18:1(11Z)/0:0)	0.12657721	5.849521956	1.828723711	0.086184146	0.317359279	-5.502047917	non
Atenolol	0.135602353	4.626525682	1.722045183	0.104374806	0.344376193	-5.503596063	non
Nabumetone	0.382439595	7.948686932	1.881019193	0.078336149	0.305790318	-5.504963353	non
Aflatoxin B1	0.839514115	3.384954779	1.439600914	0.169300154	0.427376412	-5.504989513	non
DG(22:4(7Z,10Z,13Z,16Z)/18:2(9Z,12Z)/0:0)	-0.402577009	5.021613285	-1.755936137	0.098262091	0.334431387	-5.505036507	non
PC(14:1(9Z)/16:1(9Z))	-0.255701529	4.583370435	-1.711828796	0.106281273	0.348233845	-5.506566811	non
TG(16:0/16:1(9Z)/20:4(5Z,8Z,11Z,14Z))	0.710287052	6.181509239	1.843478841	0.083902128	0.314730996	-5.507995478	non
DG(20:3(5Z,8Z,11Z)/20:1(11Z)/0:0)	0.610015263	4.450581347	1.687074519	0.111026445	0.353981149	-5.511019814	non
PC(P-18:1(9Z)/20:4(5Z,8Z,11Z,14Z))	0.112741845	5.798554547	1.818914927	0.087731396	0.319338481	-5.511896348	non
PI(18:1(11Z)/18:3(6Z,9Z,12Z))	0.255969715	4.052150472	1.619773514	0.124862596	0.373538086	-5.514269461	non
PC(18:2(9Z,12Z)/18:1(11Z))	0.308807706	3.961673523	1.598989357	0.129423245	0.379523324	-5.514463054	non
2',3'-Anhydrolutein	0.32541701	3.987193538	1.60312438	0.128504763	0.377865196	-5.516104632	non
Etomidate	0.189750056	5.8325098	1.81733259	0.087983282	0.319338481	-5.518154471	non
Amlodipine	0.133827135	8.01206502	1.872480174	0.079572487	0.308263075	-5.518293247	non
N8-Acetylspermidine	0.186020679	3.435215611	1.462371216	0.163045798	0.418649556	-5.518398454	non
LysoPA(18:0/0:0)	-0.472493188	4.698669299	-1.711917319	0.106264625	0.348233845	-5.520593684	non
Thromboxane B3	-0.23546331	11.62100062	-1.930128885	0.071552928	0.292311007	-5.522819251	non
2-Phenylpropionate	-0.35602648	4.094042147	-1.616277018	0.125620093	0.373847245	-5.523560727	non
Omeprazole sulfone	0.106141355	5.995290483	1.82411697	0.086907788	0.318562679	-5.524573524	non
PC(18:1(11Z)/24:0)	0.928747979	5.793270412	1.803315949	0.090242562	0.323042216	-5.526081428	non
PC(24:0/18:1(11Z))	0.244310322	4.444675862	1.682797691	0.111864586	0.353981149	-5.527303198	non
Lacto-N-fucopentaose III	-0.235209368	6.962070509	-1.865227182	0.08063624	0.309716467	-5.527700652	non
DG(14:0/20:0/0:0)	-0.21912806	7.46482396	-1.868308752	0.080182748	0.309455293	-5.529295791	non
Acetyl-N-formyl-5-methoxykynurenamine	0.222179612	8.52615002	1.866658385	0.080425337	0.309716467	-5.53061939	non
Kaempferol	-0.373109492	5.962358829	-1.816077423	0.088183541	0.319338481	-5.531158305	non
Isodeoxycholic acid	-0.345376355	8.248937528	-1.864555783	0.080735347	0.309726641	-5.532455636	non
PC(18:1(9Z)/14:0)	-0.430449248	6.055171928	-1.819270871	0.087674822	0.319338481	-5.535116869	non
Acarbose	-0.528764801	8.258973134	-1.862087889	0.081100571	0.310016586	-5.53676838	non
PC(14:0/22:2(13Z,16Z))	0.328904874	4.401421486	1.666376579	0.115133645	0.358350338	-5.540115271	non
Trimethoprim	-0.209958855	3.383467878	-1.42740719	0.172729703	0.431154566	-5.541284211	non
Riboflavin	0.220047129	10.1214792	1.872388687	0.079585827	0.308263075	-5.541669002	non
PC(P-18:1(11Z)/20:3(8Z,11Z,14Z))	0.595730743	7.345451697	1.859579007	0.081473366	0.310333306	-5.542663375	non
PG(18:0/18:2(9Z,12Z))	-0.922561667	2.956468393	-1.27871435	0.219273682	0.483087596	-5.542876459	non
PG(18:1(9Z)/22:6(4Z,7Z,10Z,13Z,16Z,19Z))	0.515209076	2.976634252	1.303279633	0.210962372	0.477313404	-5.543638865	non
PC(20:3(8Z,11Z,14Z)/20:2(11Z,14Z))	0.149408399	11.83172785	1.924463	0.072307715	0.293156657	-5.543789899	non
Leu-Leu-Leu	-0.474283799	1.518866707	-0.873901515	0.395127534	0.641923916	-5.545968311	non
PC(16:0/20:5(5Z,8Z,11Z,14Z,17Z))	-0.266956282	5.248199847	-1.749289794	0.099435585	0.337513388	-5.546131109	non
PC(P-16:0/18:3(9Z,12Z,15Z))	0.302691187	4.466346385	1.67169649	0.114065668	0.357354695	-5.547630675	non
Isocitric acid	0.126679889	6.860445696	1.85060317	0.082819584	0.312495518	-5.548436874	non
Estrone sulfate	0.513315294	4.952815241	1.721957524	0.104391037	0.344376193	-5.548496511	non
Myristoleic acid	0.135420388	10.35167213	1.873572146	0.07941342	0.308263075	-5.549303743	non
PC(P-18:1(11Z)/20:3(5Z,8Z,11Z))	-0.347530258	8.645213329	-1.853785439	0.082340056	0.311785284	-5.551341753	non
PC(18:1(9Z)/20:2(11Z,14Z))	-0.499237301	1.095783072	-0.72380016	0.4796607	0.70424806	-5.555072874	non
PC(18:0/22:0)	0.228813876	9.926094794	1.860014176	0.081408595	0.310333306	-5.555073876	non
PC(20:4(5Z,8Z,11Z,14Z)/18:1(11Z))	0.119440805	11.07396247	1.892297089	0.076729516	0.303421768	-5.555171117	non
DG(22:4(7Z,10Z,13Z,16Z)/14:1(9Z)/0:0)	-0.349588527	5.907931567	-1.793012018	0.091935871	0.325511847	-5.561949225	non
PC(P-18:1(9Z)/P-16:0)	0.21199403	6.450679877	1.824273577	0.086883099	0.318562679	-5.563932331	non
PC(22:5(7Z,10Z,13Z,16Z,19Z)/14:1(9Z))	1.287663932	3.796525717	1.478250881	0.158798049	0.412540885	-5.564939451	non
DG(18:2(9Z,12Z)/18:4(6Z,9Z,12Z,15Z)/0:0)	-0.175277778	5.177892638	-1.730261253	0.102863268	0.343037193	-5.565705885	non
Lorazepam	0.121899651	6.765342187	1.836593924	0.084960196	0.317104018	-5.565894158	non
TG(18:1(9Z)/18:1(9Z)/20:0)	-0.589735092	4.425100056	-1.637962867	0.120984648	0.368277671	-5.567721421	non
PC(22:5(4Z,7Z,10Z,13Z,16Z)/16:1(9Z))	0.319278845	6.473127888	1.822753451	0.087123002	0.31898741	-5.567819278	non
alpha-Tocotrienol	-0.273991855	8.411251304	-1.84275488	0.084012833	0.314778539	-5.568248102	non
Anidulafungin	0.151820733	5.976695883	1.794067161	0.091761197	0.325511847	-5.570252302	non
PC(20:2(11Z,14Z)/P-18:1(9Z))	0.452419436	6.183685244	1.803473306	0.090216917	0.323042216	-5.573866585	non
PC(20:1(11Z)/20:1(11Z))	0.156620179	7.284644848	1.841054649	0.084273336	0.315386575	-5.574397856	non
Enterodiol	0.238278872	11.09149606	1.881031147	0.07833443	0.305790318	-5.57447763	non
PI(20:4(8Z,11Z,14Z,17Z)/18:0)	0.202434929	3.840202264	1.528389838	0.145985074	0.400993757	-5.574702009	non
PE(P-18:0/22:4(7Z,10Z,13Z,16Z))	0.254124885	6.523477796	1.820529446	0.087475044	0.319338481	-5.575395075	non
PC(20:4(5Z,8Z,11Z,14Z)/18:1(9Z))	0.358129146	4.396908499	1.641414125	0.120260609	0.367737532	-5.575666098	non
PI(18:2(9Z,12Z)/20:0)	-0.165170445	4.556855867	-1.663354662	0.115744127	0.359086368	-5.57689124	non
APGPR Enterostatin	0.155247476	2.57320337	1.157087122	0.264256544	0.525828339	-5.577057568	non
Chlorotrianisene	0.127271524	3.783835164	1.512839278	0.149863123	0.405400581	-5.577244279	non
Naproxen	0.822248795	1.65455437	0.869114787	0.397662453	0.645221899	-5.581967563	non
Ganglioside GM3 (d18:1/16:0)	-0.428265854	4.704135174	-1.672349794	0.113935108	0.357354695	-5.58227071	non
PC(16:0/22:4(7Z,10Z,13Z,16Z))	0.287334438	3.489179342	1.428195948	0.172506152	0.431154566	-5.582635439	non
LysoPE(0:0/18:1(9Z))	-0.20220974	6.375804278	-1.808279994	0.089436645	0.321951868	-5.582729672	non
TG(18:0/18:2(9Z,12Z)/20:0)	-0.196936664	7.713240243	-1.833027658	0.08551289	0.317252598	-5.583938136	non
Thymol	0.142192627	5.349461442	1.732176895	0.102513594	0.342529813	-5.586280801	non
DG(20:5(5Z,8Z,11Z,14Z,17Z)/16:1(9Z)/0:0)	0.22493439	7.732176595	1.830735578	0.085869791	0.317293324	-5.587245941	non
Leukotriene F4	0.223611573	4.581820624	1.660565052	0.11631015	0.360017194	-5.587939439	non
PC(P-18:1(11Z)/20:2(11Z,14Z))	-0.359692217	8.659872274	-1.830768978	0.085864581	0.317293324	-5.588284585	non
5-Acetylamino-6-amino-3-methyluracil	0.289384263	9.17762087	1.831608261	0.08573375	0.317293324	-5.588550106	non
DG(14:0/22:2(13Z,16Z)/0:0)	-0.394489093	6.249568634	-1.793686133	0.091824241	0.325511847	-5.594241361	non
TG(20:1(11Z)/20:1(11Z)/20:4(5Z,8Z,11Z,14Z))	0.119415416	9.232333876	1.826204418	0.086579221	0.318448889	-5.597478019	non
Urolithin C 3-glucuronide	-0.181890681	5.285519341	-1.718728136	0.10499051	0.345060928	-5.598015089	non
PI(18:1(9Z)/20:4(8Z,11Z,14Z,17Z))	-0.339937401	1.683596478	-0.862496996	0.401184711	0.648316108	-5.59949885	non
PC(18:1(9Z)/22:1(13Z))	0.193323357	6.147879034	1.783330742	0.09355227	0.32938195	-5.602936048	non
4-hydroxyoct-2-enoylglycine	0.21509843	6.618617305	1.807338495	0.089589008	0.322069606	-5.603189666	non
Selenocystathionine	0.111547836	8.948892775	1.821381689	0.087339992	0.319338481	-5.603816273	non
LysoPE(18:1(11Z)/0:0)	0.287898278	3.943678969	1.531939033	0.145111853	0.399960652	-5.603837176	non
LysoPE(16:0/0:0)	-0.429103464	1.088900926	-0.64390845	0.528777472	0.740652627	-5.606203324	non
Bismuth	0.140778435	5.657344659	1.746840955	0.099871037	0.337564104	-5.607579183	non
PE(18:0/18:1(9Z))	1.143542059	3.283755971	1.3124131	0.207936584	0.473199412	-5.610822461	non
PG(18:2(9Z,12Z)/20:3(8Z,11Z,14Z))	1.55330938	2.516063021	1.070256021	0.300418465	0.556953633	-5.611404379	non
PC(20:3(5Z,8Z,11Z)/18:3(9Z,12Z,15Z))	0.195460119	7.618295364	1.816191972	0.088165248	0.319338481	-5.611777156	non
Hydroflumethiazide	0.096403048	9.389829772	1.818063123	0.087866912	0.319338481	-5.61195566	non
Ethopropazine	-0.412857702	4.094628449	-1.551692013	0.140331713	0.391490123	-5.613520944	non
Glycochenodeoxycholic acid 3-glucuronide	1.311828915	5.049711289	1.677420549	0.112926111	0.355844694	-5.616044172	non
PC(20:1(11Z)/18:4(6Z,9Z,12Z,15Z))	-0.252866189	4.418494483	-1.613263639	0.12627607	0.375437465	-5.618884552	non
8-Hydroxy-7-methylguanine	-0.771203853	2.352091825	-1.035543736	0.315846663	0.571049344	-5.621036291	non
PI(16:0/18:2(9Z,12Z))	-0.309629525	6.101834162	-1.767993223	0.096164168	0.332212738	-5.621521687	non
Dicloxacillin	0.103816786	9.160557215	1.810434769	0.089088795	0.321420361	-5.622046353	non
Timolol	0.131633394	3.593202931	1.428450114	0.172434166	0.431154566	-5.622804105	non
N2-Methylguanine	-0.342444753	7.904679111	-1.806838873	0.089669956	0.322069606	-5.624726759	non
DG(20:2(11Z,14Z)/14:0/0:0)	0.219312098	5.244799242	1.696554148	0.10918804	0.352852868	-5.625738394	non
PC(18:3(6Z,9Z,12Z)/18:3(6Z,9Z,12Z))	0.367304113	4.580386708	1.633161173	0.121998208	0.370261102	-5.625988352	non
Carboprost Tromethamine	0.110589522	6.089219033	1.765162477	0.096653158	0.332868788	-5.626083864	non
DG(18:4(6Z,9Z,12Z,15Z)/18:1(11Z)/0:0)	0.164034116	5.15128115	1.686270867	0.111183523	0.353981149	-5.628707628	non
PC(14:1(9Z)/20:1(11Z))	-0.148599539	10.53808397	-1.829562295	0.086052993	0.317359279	-5.628882332	non
PC(14:0/20:2(11Z,14Z))	0.167904498	6.354979861	1.777900564	0.094469789	0.330386714	-5.629517497	non
PC(18:0/22:6(4Z,7Z,10Z,13Z,16Z,19Z))	0.375594797	4.060056898	1.537082274	0.143854225	0.39783958	-5.632391678	non
PC(20:3(8Z,11Z,14Z)/16:0)	-0.163872433	10.85215389	-1.834969648	0.08521153	0.317104018	-5.636040714	non
Trihexosylceramide (d18:1/16:0)	0.113466036	8.981508601	1.800502103	0.09070223	0.323965362	-5.636976237	non
PE(P-18:0/18:1(9Z))	0.582959441	4.937588818	1.660100986	0.116404542	0.360017194	-5.639161943	non
4-hydroxyoct-4-enoylglycine	-0.698787303	3.852054985	-1.463225344	0.162814955	0.418649556	-5.639176153	non
m-Chlorobenzoic acid	0.150048879	6.296022297	1.767077954	0.096322037	0.332212738	-5.64144702	non
PC(20:4(8Z,11Z,14Z,17Z)/18:2(9Z,12Z))	0.129437279	8.469449587	1.79704345	0.091270058	0.324909264	-5.641577224	non
myo-Inositol	0.16224241	8.893582858	1.797423061	0.091207582	0.324909264	-5.641753021	non
PE(24:0/24:0)	-0.370073403	7.916652901	-1.792949687	0.091946199	0.325511847	-5.646743142	non
Griseofulvin	-0.210001751	5.465005775	-1.703123813	0.107929491	0.350327658	-5.646807535	non
2-hydroxyoct-4-enoylglycine	0.411732122	2.79073747	1.154739295	0.265189202	0.526328346	-5.650663375	non
PG(18:1(9Z)/18:3(6Z,9Z,12Z))	0.611951421	2.885029543	1.179408616	0.255513051	0.515683475	-5.652750214	non
4-Androsten-3beta,17beta-diol 3-sulfate	1.007469347	6.161792347	1.74754446	0.09974577	0.337524105	-5.652985337	non
DG(18:4(6Z,9Z,12Z,15Z)/18:0/0:0)	0.844162072	4.374688379	1.569472069	0.136143153	0.386179917	-5.653301054	non
PI(18:3(6Z,9Z,12Z)/18:1(11Z))	0.797277514	5.38504462	1.689540619	0.11054563	0.353981149	-5.654555268	non
25,26-dihydroxyvitamin D	-1.316676756	4.375322682	-1.526180872	0.146530775	0.401103667	-5.654748003	non
PC(20:5(5Z,8Z,11Z,14Z,17Z)/P-16:0)	0.153698366	6.53771011	1.770620676	0.095712238	0.331533975	-5.655315535	non
Nelfinavir	0.334600313	7.604225989	1.786951216	0.092944889	0.327962681	-5.658103045	non
PE(20:2(11Z,14Z)/16:0)	0.532817148	1.959115458	0.87707486	0.393452933	0.640590404	-5.661351664	non
PC(18:0/18:1(11Z))	-0.321361849	6.682975004	-1.771865298	0.095498809	0.331151918	-5.661444771	non
PI(18:1(9Z)/18:3(9Z,12Z,15Z))	-0.352575805	1.631034926	-0.762582321	0.456832558	0.69150118	-5.662749457	non
Dexbrompheniramine	0.287966424	5.128397915	1.661198322	0.116181449	0.360017194	-5.663506576	non
PC(22:5(7Z,10Z,13Z,16Z,19Z)/18:0)	0.675949563	3.911857166	1.468885613	0.161291989	0.41764493	-5.66556232	non
PC(P-18:0/18:4(6Z,9Z,12Z,15Z))	-0.127952632	13.85324257	-1.920863253	0.072790961	0.294027786	-5.666204361	non
DG(20:1(11Z)/18:0/0:0)	0.4653835	5.643099155	1.705245201	0.107525794	0.349886343	-5.667121195	non
5'-Hydroxytenoxicam	0.312299844	3.576609685	1.38817097	0.184152722	0.444263254	-5.667147146	non
N-Arachidonoylglycine	0.270709625	7.933179696	1.776596717	0.094691269	0.330386714	-5.671374455	non
11,12-DiHETrE	0.217221872	7.37870696	1.779204608	0.094248731	0.330386714	-5.672280653	non
Verapamil metabolite D-617	0.341361398	7.699473948	1.774619889	0.095027934	0.330590138	-5.676442074	non
PE(18:1(9Z)/P-18:1(9Z))	0.22070953	5.592245614	1.69278	0.109916787	0.353968579	-5.681241568	non
Orotic acid	0.267373054	4.37718633	1.565545258	0.137059012	0.387275103	-5.682938561	non
Gamma-linolenyl carnitine	0.454733446	6.647985257	1.756875168	0.098097273	0.334431387	-5.683156385	non
Tolcapone	0.137273445	6.658325964	1.755395792	0.098357041	0.334431387	-5.687455353	non
PC(16:1(9Z)/24:0)	0.652194627	6.792164015	1.757060527	0.098064768	0.334431387	-5.68932127	non
PC(20:5(5Z,8Z,11Z,14Z,17Z)/16:1(9Z))	-0.229366239	3.900044876	-1.454385693	0.165217128	0.421041428	-5.692296133	non
Cefpiramide	-0.044601047	0.66635105	-0.160554852	0.874457986	0.944779473	-5.692873668	non
6-[4-(carboxymethyl)phenoxy]-3,4,5-trihydroxyoxane-2-carboxylic acid	-0.404885362	1.415444938	-0.631192613	0.536847382	0.745273214	-5.69399658	non
PC(22:2(13Z,16Z)/18:1(9Z))	0.662672284	6.134008591	1.721696131	0.104439448	0.344376193	-5.694953155	non
Nimodipine	0.37126944	8.034630831	1.760733533	0.097422596	0.334008792	-5.696184529	non
DG(18:0/18:3(6Z,9Z,12Z)/0:0)	-0.630123823	3.762467578	-1.397817834	0.181288754	0.440664791	-5.698381224	non
6-Hydroxydopamine	0.19943057	4.487913748	1.572334964	0.135478701	0.385887593	-5.698716697	non
DG(16:0/18:1(9Z)/0:0)	-0.365455112	4.81133435	-1.60552024	0.127975132	0.377344489	-5.700324671	non
DG(20:0/16:1(9Z)/0:0)	-0.27780743	1.468311173	-0.645146129	0.527995626	0.740346705	-5.700535614	non
PC(20:2(11Z,14Z)/22:4(7Z,10Z,13Z,16Z))	0.323774363	0.71777502	0.18355095	0.856676672	0.935499143	-5.700723789	non
Chlorambucil	-0.438337847	5.360640794	-1.656756621	0.117086742	0.361505317	-5.701497706	non
4a-Carbinolamine tetrahydrobiopterin	0.119396015	6.546573194	1.739471028	0.101191618	0.339525898	-5.704339529	non
Carbamazepine	-0.303638612	4.178382155	-1.506389535	0.151496663	0.407100309	-5.706178433	non
N1-Methyl-4-pyridone-3-carboxamide	0.11113226	5.839132958	1.695490307	0.109393032	0.353026155	-5.70807593	non
PC(24:1(15Z)/P-16:0)	0.29604	5.076729791	1.625271582	0.123679361	0.372221645	-5.709998492	non
3,4,5-trihydroxy-6-{3-[(E)-2-(4-hydroxyphenyl)ethenyl]-5-{[3,4,5-trihydroxy-6-(hydroxymethyl)oxan-2-yl]oxy}phenoxy}oxane-2-carboxylic acid	0.496582499	3.851586726	1.426532091	0.172978004	0.431154566	-5.71033868	non
DG(16:0/16:0/0:0)	-0.262359849	3.79377056	-1.411263822	0.17735745	0.435720391	-5.711148711	non
7-Methylxanthine	0.432453133	4.985820534	1.61625543	0.125624783	0.373847245	-5.711350486	non
Tungsten	0.108856872	6.634732259	1.738336416	0.101396271	0.339857439	-5.712332381	non
PC(20:0/22:1(13Z))	0.249903258	3.991700339	1.464588507	0.162447097	0.41863373	-5.712853846	non
PE(14:1(9Z)/24:1(15Z))	1.181985819	3.664137663	1.335650152	0.200393944	0.46450389	-5.714361435	non
PG(18:1(9Z)/20:4(5Z,8Z,11Z,14Z))	1.842451671	2.647159956	0.982969713	0.340285197	0.590624739	-5.718190534	non
Cobalamin	0.27715337	5.336706846	1.642105616	0.120115989	0.367676303	-5.720293169	non
PC(18:3(6Z,9Z,12Z)/P-18:1(11Z))	-0.505158863	6.481891527	-1.721655195	0.104447032	0.344376193	-5.723711145	non
PC(16:1(9Z)/P-18:1(11Z))	-0.209421521	9.190919769	-1.744785121	0.100237889	0.338092292	-5.725348938	non
PI(18:0/16:1(9Z))	-1.031189729	3.538942425	-1.290389615	0.215291896	0.479598663	-5.72600887	non
TG(16:0/16:1(9Z)/20:1(11Z))	-0.780226575	3.170015311	-1.19214001	0.250625686	0.509019024	-5.726051546	non
S-(2-carboxypropyl)-Cysteamine	0.170958755	3.107858814	1.191308294	0.250942769	0.509340855	-5.728245556	non
TG(18:0/18:0/18:0)	0.427135046	4.496591212	1.546611366	0.141548366	0.393857715	-5.73298548	non
Androsterone glucuronide	-0.196353444	5.289101314	-1.627581014	0.123185216	0.372105108	-5.735147927	non
Testosterone glucuronide	0.710433745	1.844134497	0.739155456	0.470541435	0.697879237	-5.735339685	non
Estrone glucuronide	0.553758806	10.0186544	1.747647188	0.099727489	0.337524105	-5.736740517	non
allo-Inositol	0.163400749	8.16978923	1.734093981	0.102164694	0.341719618	-5.737560689	non
PE(22:0/14:1(9Z))	-0.277524	2.621307122	-1.013709314	0.325838971	0.578049136	-5.737851285	non
Dihydrogenistein	0.263447774	4.220288659	1.496409215	0.154053665	0.408518253	-5.738930586	non
PC(22:2(13Z,16Z)/20:0)	0.395396388	4.382306433	1.523999739	0.147071277	0.401395436	-5.739362442	non
PC(20:4(5Z,8Z,11Z,14Z)/P-16:0)	1.221524656	3.727649331	1.328160558	0.202800787	0.467811298	-5.742382861	non
PC(20:4(8Z,11Z,14Z,17Z)/22:2(13Z,16Z))	0.148785041	5.781680438	1.667935101	0.114819882	0.35815225	-5.742921208	non
DG(18:1(9Z)/20:4(5Z,8Z,11Z,14Z)/0:0)	-0.5749108	3.518119734	-1.295224534	0.213659777	0.479598663	-5.745226911	non
PI(20:3(5Z,8Z,11Z)/18:2(9Z,12Z))	-0.619537168	2.880699742	-1.085934946	0.293633028	0.548342738	-5.745713641	non
PE(16:1(9Z)/20:0)	-0.360637766	8.127323708	-1.728627722	0.103162267	0.343268433	-5.746624475	non
DG(14:1(9Z)/24:1(15Z)/0:0)	0.538058183	7.399915171	1.730037703	0.102904141	0.343037193	-5.747298703	non
Atropine	0.131240714	9.816926858	1.736039073	0.101811756	0.340894211	-5.74774882	non
PE(14:0/22:2(13Z,16Z))	0.251007844	6.483823123	1.707386367	0.107119661	0.349199218	-5.748626364	non
p-Synephrine	-0.396753782	5.884179416	-1.668730961	0.114659943	0.358145016	-5.749574804	non
PC(P-18:1(11Z)/18:1(11Z))	-0.476614474	7.334681314	-1.726590672	0.103536185	0.344155994	-5.751148801	non
PC(18:2(9Z,12Z)/14:0)	-0.028099882	0.86965259	-0.04182804	0.967154431	0.988708335	-5.752482172	non
PC(22:1(13Z)/20:1(11Z))	0.148299203	8.150907081	1.723341692	0.104135006	0.344376193	-5.753974474	non
Esmolol	0.310553228	3.801193732	1.382847153	0.185748916	0.44525104	-5.75541353	non
DG(18:2(9Z,12Z)/20:4(8Z,11Z,14Z,17Z)/0:0)	0.358244232	6.029680043	1.67510296	0.113386312	0.356594955	-5.757706967	non
DG(20:0/20:4(8Z,11Z,14Z,17Z)/0:0)	0.146910933	6.888726783	1.717997624	0.105126529	0.345154689	-5.75792496	non
Gentamicin	0.273198405	5.488765535	1.630803979	0.122498429	0.3710686	-5.758911255	non
Cefdinir	-0.735778049	2.158080411	-0.817086279	0.425904863	0.668433685	-5.759903928	non
Vidarabine	0.299660248	6.747108818	1.71080109	0.106474716	0.348512043	-5.761162748	non
PC(20:3(5Z,8Z,11Z)/20:3(8Z,11Z,14Z))	0.136523241	11.19601241	1.767267781	0.096289276	0.332212738	-5.761589779	non
PC(22:5(7Z,10Z,13Z,16Z,19Z)/P-18:1(11Z))	0.681078902	9.315404984	1.721582923	0.104460421	0.344376193	-5.762797879	non
DG(18:1(11Z)/22:6(4Z,7Z,10Z,13Z,16Z,19Z)/0:0)	0.126013814	5.41314238	1.620810731	0.12463864	0.373419069	-5.762843914	non
Dopamine	0.299779523	2.479600671	0.933285067	0.364573921	0.612263002	-5.76905464	non
DG(20:0/14:0/0:0)	-0.201431176	3.443268637	-1.262303333	0.224968237	0.487254967	-5.771006494	non
Etiocholanolone glucuronide	0.562150265	11.30548691	1.764778919	0.096719582	0.332868788	-5.771339183	non
Irinotecan	-0.218461008	4.148244954	-1.453625246	0.165425139	0.421237209	-5.772609876	non
PC(18:1(11Z)/22:4(7Z,10Z,13Z,16Z))	0.143706277	1.054874945	0.224450087	0.825254437	0.920740791	-5.774413357	non
PC(22:0/P-18:0)	0.166686211	11.12690637	1.756465291	0.098169184	0.334431387	-5.774646668	non
DG(18:0/14:0/0:0)	-0.216894633	3.595189096	-1.305848293	0.210107903	0.476452315	-5.775229953	non
PC(20:1(11Z)/16:0)	0.167845121	4.162489245	1.457608749	0.164337898	0.419800311	-5.776366223	non
Fentanyl	0.329082926	5.791417413	1.644214546	0.119675844	0.366678563	-5.778730912	non
Pyridoxine	0.368514715	8.379888074	1.70743508	0.107110436	0.349199218	-5.779847241	non
Nicotine	0.24717973	8.639510088	1.708027753	0.106998263	0.349199218	-5.780342689	non
PC(18:3(6Z,9Z,12Z)/18:0)	0.107155397	7.963792842	1.702414266	0.108064811	0.350327658	-5.785643553	non
TG(16:0/16:0/20:4(5Z,8Z,11Z,14Z))	-0.27525503	3.65523814	-1.312710578	0.207838616	0.473199412	-5.786539789	non
DG(18:3(6Z,9Z,12Z)/20:2(11Z,14Z)/0:0)	-0.355755463	2.79965086	-1.02411463	0.32104928	0.573445568	-5.78793032	non
Oxcarbazepine	-0.600459579	3.932604852	-1.372081496	0.189010929	0.449384114	-5.790777818	non
PC(20:5(5Z,8Z,11Z,14Z,17Z)/22:0)	-0.141435453	5.385089192	-1.596955934	0.129876959	0.380506311	-5.793404842	non
2-Hydroxydecanoate	-0.701377646	3.516420084	-1.244980365	0.231104157	0.492419009	-5.795018113	non
DG(22:0/14:1(9Z)/0:0)	0.680428134	5.290624532	1.586623015	0.132203475	0.38312758	-5.795062494	non
PC(14:1(9Z)/18:2(9Z,12Z))	-0.554327241	5.297795	-1.587162948	0.132081036	0.38312758	-5.795097372	non
PI(16:0/16:0)	-0.234260544	5.397026641	-1.595198063	0.13027028	0.381310728	-5.797399277	non
3,5-dihydroxy-4-(sulfooxy)benzoic acid	0.309407968	6.601110615	1.680605786	0.112296254	0.354555824	-5.79757269	non
DG(18:1(9Z)/18:2(9Z,12Z)/0:0)	-0.147142214	6.42958474	-1.670984598	0.114208084	0.357429005	-5.799102126	non
Lisinopril	0.267639884	4.654576132	1.522248246	0.14750652	0.401733193	-5.799736162	non
Epi-coprostanol	0.161119045	9.035672149	1.694808914	0.109524504	0.353095565	-5.800806547	non
Caffeic acid	0.122074726	1.694368867	0.579466136	0.570361809	0.772050766	-5.801094481	non
CDP	0.178199221	5.111456127	1.564716791	0.137252902	0.387275103	-5.802037774	non
3,4-Dihydroxymandelic acid	0.1835286	5.773187496	1.625356019	0.123661264	0.372221645	-5.805042543	non
PC(14:1(9Z)/24:0)	-0.416876203	8.272496164	-1.690036766	0.110449114	0.353981149	-5.805874959	non
gamma-Tocopherol	0.201923848	8.221261302	1.689384537	0.110576008	0.353981149	-5.806167737	non
PC(16:0/22:1(13Z))	0.315032568	5.892957046	1.631027317	0.122450959	0.3710686	-5.809634466	non
Fluconazole	-0.33000852	2.5154573	-0.89634229	0.383386716	0.631310125	-5.810909705	non
PC(14:1(9Z)/22:1(13Z))	-0.245791045	8.226151933	-1.686313905	0.111175106	0.353981149	-5.811118761	non
D-chiro-Inositol	0.564837103	6.886944672	1.67992034	0.112431539	0.354634256	-5.812990576	non
Guanadrel	-0.543905981	6.261782233	-1.649814074	0.118513902	0.364859193	-5.8143914	non
Meropenem	0.354011377	5.14458437	1.558666856	0.138675825	0.389974528	-5.815203844	non
MG(14:0/0:0/0:0)	-0.488221067	7.767134727	-1.684033566	0.111621828	0.353981149	-5.815784792	non
MG(20:1(11Z)/0:0/0:0)	-0.193150887	5.344640729	-1.576418498	0.1345357	0.385062711	-5.817290521	non
Zolmitriptan	0.092615027	7.629457935	1.682707916	0.111882238	0.353981149	-5.818467093	non
PI(22:3(10Z,13Z,16Z)/18:3(6Z,9Z,12Z))	0.496127682	5.84333486	1.619418907	0.124939241	0.373538086	-5.819591199	non
PI(16:1(9Z)/16:0)	-0.331165364	1.576658068	-0.475779561	0.640676439	0.817976957	-5.819786154	non
Proparacaine	0.122984512	8.968642426	1.681190239	0.112181013	0.354540583	-5.821217091	non
DG(22:2(13Z,16Z)/14:1(9Z)/0:0)	-0.293755389	6.131814423	-1.636992347	0.121188926	0.368277671	-5.823569522	non
Astaxanthin	0.547842712	9.547039115	1.68292461	0.111839635	0.353981149	-5.824199033	non
Ethambutol	0.384785707	5.844052461	1.616920983	0.125480288	0.373847245	-5.824559377	non
DG(22:1(13Z)/16:1(9Z)/0:0)	-0.049770172	1.169858009	-0.05182105	0.959314137	0.986423154	-5.82620595	non
Ethynodiol Diacetate	0.494638145	8.358777087	1.675967724	0.113214408	0.356403397	-5.827331944	non
PA(16:0/18:2(9Z,12Z))	0.351958149	4.672492636	1.502174348	0.152572261	0.4084329	-5.829597987	non
PE(20:1(11Z)/20:4(8Z,11Z,14Z,17Z))	0.026384008	1.183614883	0.032332096	0.974607978	0.991344634	-5.830593376	non
PI(18:3(9Z,12Z,15Z)/18:1(9Z))	-0.810867865	5.599352706	-1.585356042	0.132491162	0.383269479	-5.831228378	non
PC(20:1(11Z)/22:4(7Z,10Z,13Z,16Z))	0.587598733	4.742627893	1.505362468	0.151758157	0.407100309	-5.831561901	non
PC(14:0/18:0)	0.920228299	1.945217008	0.625285152	0.540619447	0.747719575	-5.832835194	non
LysoPE(18:2(9Z,12Z)/0:0)	0.356421818	6.127569364	1.630274846	0.122610958	0.3710686	-5.833846822	non
PI(22:3(10Z,13Z,16Z)/18:3(9Z,12Z,15Z))	-0.185562821	6.052244881	-1.625233707	0.123687479	0.372221645	-5.83387352	non
PI(18:1(11Z)/20:1(11Z))	-0.106005863	1.290810241	-0.21957779	0.828982824	0.921770834	-5.83440453	non
Quercetin	0.184932935	4.189130527	1.418126347	0.175377972	0.433548516	-5.836719843	non
DG(18:2(9Z,12Z)/18:2(9Z,12Z)/0:0)	0.456219345	5.790649461	1.603763331	0.128363334	0.377795293	-5.836784718	non
TG(16:1(9Z)/18:0/20:0)	0.092413005	9.390241157	1.672574723	0.113890186	0.357354695	-5.837027868	non
DG(16:1(9Z)/20:4(5Z,8Z,11Z,14Z)/0:0)	-0.523445186	5.575706163	-1.582351572	0.133175499	0.383865825	-5.837156766	non
DG(18:1(11Z)/18:3(6Z,9Z,12Z)/0:0)	-0.173395716	5.289341077	-1.557043509	0.139059743	0.389974528	-5.83721808	non
Thromboxane B2	0.292448014	7.476269268	1.668821333	0.114641793	0.358145016	-5.84090992	non
Phenylephrine	0.847918554	5.820947419	1.599000132	0.129420844	0.379523324	-5.840971948	non
7C-aglycone	-0.401088339	6.143035942	-1.6252729	0.123679078	0.372221645	-5.841026582	non
PE(18:0/15:0)	0.322892162	1.434313843	0.331832328	0.744332239	0.876681189	-5.841415008	non
PG(18:1(11Z)/16:1(9Z))	-0.044901188	1.235369971	-0.068796966	0.946005539	0.981620307	-5.841603934	non
PE(18:4(6Z,9Z,12Z,15Z)/22:1(13Z))	0.119905971	4.420615456	1.459488007	0.163827032	0.419496492	-5.841824953	non
8-Hydroxyguanine	-0.326796301	2.035401085	-0.663266075	0.516623515	0.730461518	-5.842249604	non
Pyridoxamine	0.130023633	3.770228677	1.306423273	0.209917012	0.476452315	-5.842638466	non
Deoxyadenosine	0.336104052	8.761610647	1.665778542	0.115254239	0.358350338	-5.844303372	non
MG(0:0/14:0/0:0)	-0.933926417	3.310542594	-1.119354419	0.279547609	0.537592764	-5.845458051	non
PC(20:3(5Z,8Z,11Z)/P-18:0)	0.126687784	6.770385716	1.65594523	0.117252771	0.361670172	-5.845651259	non
Hexadecyl Benzoic acid	0.179918581	5.501133521	1.572045964	0.13554565	0.385887593	-5.846439727	non
PC(20:2(11Z,14Z)/18:3(9Z,12Z,15Z))	-0.250444882	6.257334099	-1.628306789	0.123030273	0.371987011	-5.847849128	non
4-hydroxyoct-7-enoylglycine	0.196284482	4.841470371	1.5068998	0.151366888	0.407100309	-5.84933242	non
Bexarotene	0.209870893	7.228736932	1.663512962	0.115712078	0.359086368	-5.849336059	non
DG(20:2(11Z,14Z)/18:1(9Z)/0:0)	-0.090749437	5.982461189	-1.609477966	0.127104307	0.377038667	-5.850577425	non
6-hydroxyoct-3-enoylglycine	-0.31514914	5.50460975	-1.564880891	0.137214478	0.387275103	-5.855361444	non
DG(18:3(9Z,12Z,15Z)/18:0/0:0)	-0.202514994	4.703327596	-1.486226532	0.15669945	0.410661458	-5.855383886	non
Coumesterol	0.258166431	5.701863359	1.584295406	0.132732405	0.383276755	-5.855875206	non
Hesperetin	0.861450612	5.030179458	1.517051527	0.148804244	0.404116941	-5.856445276	non
3-Methylxanthine	-1.537416247	5.553328149	-1.554050139	0.139770018	0.390556191	-5.85741464	non
Natamycin	0.20767425	5.640591995	1.57635597	0.134550097	0.385062711	-5.859562141	non
DG(16:0/22:4(7Z,10Z,13Z,16Z)/0:0)	0.566825254	7.695819399	1.654715582	0.117504771	0.362099636	-5.85998528	non
PC(18:0/20:5(5Z,8Z,11Z,14Z,17Z))	0.129646409	11.22610956	1.703717837	0.107816317	0.350327658	-5.86127724	non
3-hydroxyphenylpropionylglycine	-0.595920957	2.787597222	-0.930724611	0.365857102	0.613455432	-5.865460382	non
Leukotriene D4	0.178150484	6.901972385	1.646388439	0.119223589	0.366341574	-5.866488688	non
Etonogestrel	0.324791897	5.382309492	1.545569587	0.141798933	0.39421331	-5.866587651	non
DG(22:5(4Z,7Z,10Z,13Z,16Z)/14:0/0:0)	0.142986784	5.755787963	1.580764038	0.133538306	0.383978366	-5.867975561	non
PC(22:4(7Z,10Z,13Z,16Z)/P-18:0)	0.177979157	4.534831079	1.456921736	0.164524987	0.419944143	-5.868745594	non
DG(22:5(4Z,7Z,10Z,13Z,16Z)/16:1(9Z)/0:0)	0.180947745	3.977819769	1.340743957	0.1987701	0.4635082	-5.871017514	non
PC(20:0/22:5(4Z,7Z,10Z,13Z,16Z))	0.173275349	5.077811905	1.512327138	0.149992294	0.405408465	-5.871632445	non
Cinoxacin	0.107028153	4.937016899	1.499081826	0.15336543	0.408518253	-5.872515895	non
Gefitinib	0.332022586	7.451001803	1.646825542	0.119132832	0.366341574	-5.873840326	non
TG(20:0/20:0/20:4(5Z,8Z,11Z,14Z))	0.310314333	3.684863892	1.253508455	0.228067336	0.489893654	-5.874187457	non
Cinnamoylglycine	0.232600436	5.353973993	1.536923143	0.143892998	0.39783958	-5.874802055	non
PC(18:4(6Z,9Z,12Z,15Z)/P-16:0)	-0.157029736	3.166718503	-1.073665478	0.298933269	0.554840883	-5.876445747	non
PC(20:3(8Z,11Z,14Z)/18:0)	-0.179163606	7.349727567	-1.644636736	0.119587897	0.366678563	-5.877234567	non
6-hydroxyoct-7-enoylglycine	-0.476222839	2.340557254	-0.739578236	0.470291844	0.697879237	-5.877960361	non
Adenosine 2',3'-cyclic phosphate	0.409529328	5.416034354	1.539331365	0.143307161	0.397031314	-5.880019659	non
Maltotriose	0.102082524	7.348746273	1.640915236	0.120365041	0.367737532	-5.883421174	non
Trihexyphenidyl	-1.205721665	4.168653903	-1.316580699	0.206567422	0.47283397	-5.884524922	non
PI(16:0/22:5(4Z,7Z,10Z,13Z,16Z))	0.017168365	1.408483991	0.066402844	0.94788155	0.982455668	-5.886947412	non
N,O-Bis- (trimethylsilyl)phenylalanine	-0.71074562	8.931272387	-1.636797418	0.12122999	0.368277671	-5.888388338	non
Enalapril	0.453594508	5.418910745	1.53213368	0.14506409	0.399960652	-5.890379214	non
PC(18:2(9Z,12Z)/16:0)	-0.31762978	5.53279438	-1.542356173	0.14257417	0.395557635	-5.891109384	non
DG(18:4(6Z,9Z,12Z,15Z)/20:2(11Z,14Z)/0:0)	-0.137706254	5.547977012	-1.542034159	0.142652053	0.395557635	-5.895273663	non
DG(18:2(9Z,12Z)/20:3(5Z,8Z,11Z)/0:0)	0.136428575	3.361321976	1.129491314	0.275376188	0.533159456	-5.895308401	non
N-Acetylneuraminate 9-phosphate	-0.398984613	4.786994512	-1.462218328	0.163087147	0.418649556	-5.8971063	non
Diethylstilbestrol	0.744552991	5.347633244	1.519797192	0.148117412	0.403055092	-5.897164826	non
4-hydroxyoct-1-enoylglycine	-0.174644818	6.233706995	-1.59314779	0.130730303	0.381715742	-5.897481843	non
DG(18:3(9Z,12Z,15Z)/20:3(5Z,8Z,11Z)/0:0)	0.218206411	4.811980496	1.468960331	0.161271964	0.41764493	-5.897494135	non
Omeprazole	-0.291560899	6.57624223	-1.608497667	0.127319531	0.377038667	-5.901788694	non
5alpha-Pregnan-3beta,20alpha-diol disulfate	-0.911731021	4.074210302	-1.302745692	0.211140333	0.477313404	-5.904198414	non
PI(20:3(8Z,11Z,14Z)/20:3(5Z,8Z,11Z))	0.203777811	6.958587696	1.621001391	0.12459751	0.373419069	-5.90632933	non
PC(18:1(11Z)/16:1(9Z))	-0.248639255	7.562977248	-1.623881308	0.123977651	0.372745542	-5.906566084	non
Rutin	-0.163314859	4.066791881	-1.332372361	0.201444464	0.465351204	-5.907145556	non
gamma-Carotene	0.299475816	6.709719278	1.611250596	0.126715913	0.376396665	-5.907744068	non
Urobilinogen	0.432116812	5.833590837	1.5574368	0.138966648	0.389974528	-5.908928625	non
PE(14:0/16:0)	-0.132479496	3.294224636	-1.090230474	0.291793838	0.546458639	-5.909078399	non
2-Methoxyestrone	0.153069482	8.916095295	1.621056059	0.124585719	0.373419069	-5.910699297	non
PC(20:0/P-18:0)	0.342781762	6.687999429	1.607589711	0.12751915	0.377038667	-5.911504282	non
Argatroban	0.165644967	4.744567967	1.45151495	0.166003513	0.422051376	-5.911900883	non
Gestrinone	0.266265927	7.943390945	1.617967999	0.125253263	0.373847245	-5.912047745	non
Adapalene	-0.150626719	6.073884391	-1.572927237	0.135341583	0.385887593	-5.912171904	non
PE(16:0/20:2(11Z,14Z))	-0.336115644	4.240946906	-1.362030297	0.192098087	0.453313076	-5.914791994	non
Linoleyl carnitine	-0.294990474	7.811567235	-1.61651437	0.125568549	0.373847245	-5.915519144	non
PE(20:1(11Z)/18:0)	-0.916613047	3.732704812	-1.192733989	0.250399424	0.508881362	-5.917505528	non
TG(16:1(9Z)/16:1(9Z)/20:0)	0.126855872	5.36779186	1.505358034	0.151759287	0.407100309	-5.920973181	non
Treprostinil	0.102473081	5.139433004	1.482289237	0.157732557	0.411514878	-5.920984824	non
Bilirubin	-0.154308581	6.80385237	-1.604862491	0.128120349	0.377426092	-5.922187177	non
trans-Hexadec-2-enoyl carnitine	0.274484867	3.40787967	1.116244755	0.280836655	0.537896757	-5.925979339	non
7-octenoylglycine	0.168285397	7.905621545	1.608464136	0.127326899	0.377038667	-5.926001723	non
PC(18:1(11Z)/14:0)	0.137993788	11.8912768	1.684391912	0.111551525	0.353981149	-5.927142862	non
Amsacrine	-0.762728851	3.558103331	-1.136199519	0.272641409	0.533159456	-5.928960845	non
PC(18:3(9Z,12Z,15Z)/18:3(9Z,12Z,15Z))	0.228543266	8.603971755	1.606416268	0.127777533	0.377108143	-5.931939614	non
PC(18:3(9Z,12Z,15Z)/P-16:0)	0.373893521	10.72024652	1.63705162	0.121176441	0.368277671	-5.934422853	non
PC(16:0/P-18:1(11Z))	0.194564322	6.03822022	1.555042688	0.139534165	0.390282408	-5.934989013	non
Nitroprusside	0.2757021	4.226360993	1.344769287	0.197494343	0.461203153	-5.941002402	non
PI(16:0/20:4(8Z,11Z,14Z,17Z))	0.142378882	7.403529197	1.601407253	0.1288855	0.378638005	-5.941290457	non
MG(0:0/22:2(13Z,16Z)/0:0)	0.327172519	6.699217247	1.587553227	0.131992593	0.38312758	-5.941425281	non
TG(18:2(9Z,12Z)/20:1(11Z)/20:1(11Z))	-0.171621827	4.114604025	-1.316234254	0.206680964	0.47283397	-5.942132146	non
PC(22:2(13Z,16Z)/20:4(5Z,8Z,11Z,14Z))	-0.21029426	4.40363708	-1.375400296	0.188000425	0.448491356	-5.944160241	non
PC(18:3(6Z,9Z,12Z)/P-18:0)	0.334702977	6.067009122	1.549375865	0.14088526	0.392352618	-5.945316951	non
PE(20:1(11Z)/18:1(11Z))	0.157752202	2.770755368	0.836909379	0.414995843	0.658715271	-5.950986723	non
PC(22:5(7Z,10Z,13Z,16Z,19Z)/18:1(9Z))	-0.30028984	7.45463558	-1.593394253	0.130674931	0.381715742	-5.951646781	non
TG(16:1(9Z)/16:1(9Z)/16:1(9Z))	-0.167959611	5.356397138	-1.481932702	0.157826387	0.411514878	-5.951712829	non
DG(16:1(9Z)/18:1(11Z)/0:0)	-0.169042448	3.975457337	-1.272021754	0.221582153	0.484013805	-5.952131572	non
PC(16:1(9Z)/22:5(7Z,10Z,13Z,16Z,19Z))	0.479813963	5.595144352	1.504800369	0.151901428	0.407141475	-5.952563935	non
Phenylpyruvic acid	0.561274523	8.933186059	1.592463445	0.130884158	0.381715742	-5.952933069	non
PC(16:1(9Z)/22:5(4Z,7Z,10Z,13Z,16Z))	0.450280967	5.650414552	1.509834865	0.150622217	0.406085591	-5.953269403	non
DG(14:0/22:5(7Z,10Z,13Z,16Z,19Z)/0:0)	-0.313267005	5.052842693	-1.449292761	0.166614355	0.422589805	-5.95472759	non
5alpha-Androstan-3alpha,17beta-diol disulfate	0.172080782	7.219964351	1.591222761	0.131163482	0.382183248	-5.955870899	non
PC(16:1(9Z)/P-18:1(9Z))	-0.49164272	5.514617369	-1.492092114	0.15517081	0.409075099	-5.957185971	non
Ropinirole	0.187060545	8.267946862	1.586813493	0.13216027	0.38312758	-5.958340211	non
PC(P-18:1(11Z)/18:3(9Z,12Z,15Z))	-0.161508325	6.858136276	-1.581535143	0.133361977	0.383978366	-5.958690466	non
3-[4-methoxy-3-(sulfooxy)phenyl]propanoic acid	0.245473403	3.919434938	1.252206201	0.228529039	0.489912214	-5.959569727	non
TG(16:0/18:2(9Z,12Z)/20:1(11Z))	-0.145717339	5.423493539	-1.481689263	0.15789048	0.411514878	-5.961592384	non
PC(18:0/14:0)	0.202932331	7.793422137	1.583662741	0.132876483	0.383348056	-5.962868483	non
PC(22:5(4Z,7Z,10Z,13Z,16Z)/P-18:1(9Z))	-0.178587877	8.649247983	-1.584526812	0.13267974	0.383276755	-5.963659818	non
TG(18:0/18:0/20:1(11Z))	-0.27944205	3.524395656	-1.118103496	0.280065622	0.537592764	-5.963838656	non
PE(P-18:0/20:2(11Z,14Z))	0.443856246	5.428319501	1.480190339	0.158285594	0.411542544	-5.963900325	non
DG(14:0/18:3(6Z,9Z,12Z)/0:0)	-0.392765192	9.236366485	-1.585959193	0.132354141	0.383218346	-5.96395766	non
PE(18:0/18:2(9Z,12Z))	0.988878023	7.153925484	1.578109411	0.134146852	0.384937927	-5.964648524	non
Phenylbutazone	-0.203333188	5.619435923	-1.497525268	0.153765953	0.408518253	-5.966629866	non
Aminoglutethimide	0.161465914	3.89728868	1.239096727	0.233217589	0.495278887	-5.968184871	non
PE(20:4(8Z,11Z,14Z,17Z)/P-18:0)	-0.27312139	5.546537344	-1.487411535	0.156389619	0.410661458	-5.970029648	non
Mometasone	-0.282378943	7.294762125	-1.58061115	0.13357329	0.383978366	-5.970182022	non
4-Aminohippuric acid	0.149260301	5.813033348	1.513397601	0.149722411	0.405361434	-5.970250156	non
PI(16:0/20:3(8Z,11Z,14Z))	0.022527656	1.725554162	0.073305784	0.94247337	0.979379285	-5.971989897	non
LysoPA(18:2(9Z,12Z)/0:0)	0.090122148	1.809484741	0.228122836	0.822446818	0.919193473	-5.972264986	non
DG(20:3(5Z,8Z,11Z)/18:2(9Z,12Z)/0:0)	-1.403256694	7.791924012	-1.577146279	0.13436822	0.385062711	-5.973593485	non
PE(18:1(11Z)/18:0)	0.014219618	1.728460217	0.028044809	0.97797399	0.991874442	-5.975054435	non
Cephalexin	-0.436590515	6.950425943	-1.569623093	0.136108033	0.386179917	-5.976740392	non
Ethotoin	0.153692289	3.897081488	1.231278846	0.236049009	0.497254398	-5.97738007	non
TG(16:0/18:1(9Z)/20:0)	-1.076620994	5.696877512	-1.485858855	0.156795686	0.410661458	-5.977554847	non
DG(18:0/20:1(11Z)/0:0)	-0.647938391	5.909829765	-1.510386801	0.150482525	0.406049906	-5.977651247	non
MG(0:0/18:3(9Z,12Z,15Z)/0:0)	-0.259036641	7.12008239	-1.57224649	0.135499194	0.385887593	-5.980130956	non
DG(18:0/18:0/0:0)	-0.456332707	8.3338357	-1.571132591	0.135757426	0.385887593	-5.981483117	non
DG(20:1(11Z)/18:1(11Z)/0:0)	0.482739782	3.955936747	1.237224852	0.233893116	0.495712934	-5.983000844	non
Pregnanetriol	-0.39153595	9.085160429	-1.570950218	0.135799745	0.385887593	-5.984637397	non
DG(18:2(9Z,12Z)/20:0/0:0)	-0.180924866	7.841023213	-1.567380713	0.136630279	0.386537291	-5.986268789	non
TG(16:1(9Z)/18:1(9Z)/20:1(11Z))	0.508116254	7.165574118	1.567587238	0.136582109	0.386537291	-5.987317594	non
DG(20:0/18:2(9Z,12Z)/0:0)	0.477147005	7.217979579	1.568040632	0.136476409	0.386537291	-5.987677562	non
TG(16:1(9Z)/20:1(11Z)/20:4(5Z,8Z,11Z,14Z))	-0.276260404	7.994646275	-1.562842585	0.137692384	0.388174051	-5.992460886	non
DG(18:1(9Z)/22:4(7Z,10Z,13Z,16Z)/0:0)	0.418657983	6.417405922	1.536604768	0.143970598	0.39783958	-5.993657607	non
PI(20:3(5Z,8Z,11Z)/20:3(5Z,8Z,11Z))	-0.18040821	5.270417699	-1.441470623	0.168779268	0.426807336	-5.994522704	non
p-Hydroxyphenylacetic acid	-0.165858975	2.101921726	-0.415158141	0.683551851	0.841899912	-5.995289606	non
PE(18:2(9Z,12Z)/22:2(13Z,16Z))	0.181705519	2.312359905	0.545357748	0.593045689	0.785914035	-5.997889143	non
DG(22:0/14:0/0:0)	0.243178622	4.073567141	1.262102452	0.225038653	0.487254967	-5.998300376	non
DG(20:3(5Z,8Z,11Z)/16:0/0:0)	0.423957127	4.763408432	1.38574327	0.184879213	0.445118052	-5.99904789	non
DG(20:3(8Z,11Z,14Z)/18:1(9Z)/0:0)	0.373980749	6.775675172	1.549458471	0.140865486	0.392352618	-6.000364735	non
Glycochenodeoxycholate-3-sulfate	0.159291268	4.949446155	1.40409195	0.179445605	0.438578069	-6.002266858	non
Cyclo(Leu-Phe)	0.268674651	4.04258103	1.249896534	0.229349705	0.49031576	-6.002647181	non
PC(22:4(7Z,10Z,13Z,16Z)/20:2(11Z,14Z))	0.202993591	4.448321089	1.340047369	0.19899154	0.463687833	-6.003999473	non
D-Galactose	0.131880581	7.490132779	1.555260333	0.139482492	0.390282408	-6.007167546	non
(3R,6'R)-3-Hydroxy-3',4'-didehydro-beta,gamma-carotene	0.247005536	5.495289719	1.454447035	0.165200359	0.421041428	-6.009361836	non
PC(16:0/18:1(9Z))	0.127858212	5.456541665	1.45026958	0.166345616	0.422241718	-6.009598885	non
DG(20:1(11Z)/20:3(8Z,11Z,14Z)/0:0)	0.450894472	2.992280847	0.857970334	0.403605776	0.648637712	-6.010778697	non
5-nonenoylglycine	-0.171000661	5.18612201	-1.420399264	0.174726349	0.433110174	-6.011118091	non
DG(20:5(5Z,8Z,11Z,14Z,17Z)/20:2(11Z,14Z)/0:0)	-0.308859183	4.563157427	-1.347416017	0.196659092	0.460573357	-6.01172598	non
5-alpha-Dihydrotestosterone glucuronide	0.644776526	6.553917022	1.528863846	0.145868198	0.400993757	-6.013148042	non
PC(18:1(9Z)/16:1(9Z))	-0.814061031	9.563955431	-1.555761721	0.139363515	0.390282408	-6.013594325	non
PC(20:3(8Z,11Z,14Z)/18:2(9Z,12Z))	0.438470016	4.187704799	1.272151989	0.22153705	0.484013805	-6.015702889	non
PC(P-18:1(9Z)/22:0)	-0.253036873	6.698933055	-1.531430451	0.145236712	0.399961476	-6.020742774	non
1,4-Bis-(1,1-dimethylethyl)-benzene	-0.416084342	3.83123955	-1.160841629	0.262770246	0.523421376	-6.02340074	non
PE(14:1(9Z)/22:1(13Z))	-0.112563877	3.929993959	-1.198791303	0.248100967	0.507903272	-6.024706931	non
Lacto-N-hexaose	-0.342907283	5.013488073	-1.391021316	0.183302712	0.443106915	-6.02657267	non
DG(22:5(4Z,7Z,10Z,13Z,16Z)/18:2(9Z,12Z)/0:0)	0.14956303	5.016944998	1.391072356	0.18328752	0.443106915	-6.027694419	non
6-(3-carboxy-2-hydroxyphenoxy)-3,4,5-trihydroxyoxane-2-carboxylic acid	-0.265436445	4.127832887	-1.246595284	0.230526685	0.491514732	-6.028119021	non
11Z-Eicosenoic acid	0.453919342	4.887430916	1.376793522	0.187577522	0.448338261	-6.028469955	non
Dodecanol	-0.404347751	5.081902473	-1.391636202	0.183119763	0.443106915	-6.035101634	non
PG(18:1(9Z)/18:1(9Z))	-0.114024816	6.342172078	-1.501918912	0.152637645	0.4084329	-6.03650679	non
Melatonin	0.107812578	3.490001385	1.04244503	0.312734664	0.568174895	-6.036584198	non
PE(18:0/22:5(7Z,10Z,13Z,16Z,19Z))	0.254315103	5.935329129	1.473324462	0.160105924	0.415266658	-6.038694067	non
Methylphenidate	-0.12145519	4.478790304	-1.315501085	0.206921412	0.47283397	-6.039360479	non
Palmitoylethanolamide	-0.214857292	7.001044088	-1.528385255	0.145986204	0.400993757	-6.039753455	non
(S)-Lipoic acid	-0.120590094	2.673251866	-0.670175059	0.512324311	0.728918077	-6.040252901	non
PC(22:6(4Z,7Z,10Z,13Z,16Z,19Z)/P-16:0)	-0.139800289	2.624462962	-0.634535396	0.534719374	0.74457238	-6.04643956	non
PC(22:5(7Z,10Z,13Z,16Z,19Z)/20:0)	0.298103069	8.437890394	1.525849574	0.146612766	0.401103667	-6.046548679	non
Doxycycline	0.100590483	5.8589053	1.461669996	0.163235517	0.418649556	-6.04671631	non
PC(20:4(8Z,11Z,14Z,17Z)/22:0)	-0.401379519	7.088949976	-1.523249826	0.147257497	0.401395436	-6.047369689	non
PE(22:1(13Z)/P-16:0)	-0.386794004	8.957919624	-1.523274873	0.147251274	0.401395436	-6.051819382	non
DG(20:3(5Z,8Z,11Z)/20:4(5Z,8Z,11Z,14Z)/0:0)	-0.368075763	5.143644316	-1.383518716	0.185546951	0.44525104	-6.054208008	non
Thiamine pyrophosphate	-0.577075859	12.50799743	-1.620680011	0.124666846	0.373419069	-6.055954733	non
Pefloxacin	0.73856974	7.833061298	1.518176677	0.148522465	0.4038151	-6.057327385	non
5'-Deoxyadenosine	-0.205360311	2.481381524	-0.529279709	0.603893675	0.793639234	-6.059217393	non
Idoxuridine	0.603949323	5.208303379	1.3863951	0.184683925	0.445118052	-6.059352449	non
PC(14:0/22:1(13Z))	-0.413056549	4.787662604	-1.337033113	0.199952026	0.46450389	-6.06088479	non
PI(18:0/16:0)	-0.12328907	5.868285087	-1.451291698	0.166064798	0.422051376	-6.061127116	non
PE(16:0/20:4(5Z,8Z,11Z,14Z))	0.288534925	8.181675253	1.513907056	0.14959411	0.405355855	-6.061540463	non
Varanic acid	0.131347453	7.184374767	1.516728644	0.148885189	0.404116941	-6.061742678	non
MG(18:4(6Z,9Z,12Z,15Z)/0:0/0:0)	0.239199003	5.066934619	1.369419086	0.189824743	0.450313828	-6.062074718	non
PC(18:1(9Z)/18:2(9Z,12Z))	-0.306050579	7.607454131	-1.514385099	0.149473804	0.405355855	-6.063329253	non
DG(18:1(9Z)/18:3(6Z,9Z,12Z)/0:0)	0.13132212	4.658777071	1.324200499	0.204082681	0.470092891	-6.064309519	non
DG(16:0/22:5(4Z,7Z,10Z,13Z,16Z)/0:0)	-0.325278403	5.524071758	-1.414952818	0.176291113	0.434462843	-6.064398267	non
Trospium	-0.141408713	5.163289688	-1.376453861	0.187680552	0.448338261	-6.065660537	non
PC(16:0/24:0)	0.217644477	5.172847711	1.376093051	0.187790048	0.448338261	-6.067180656	non
Coenzyme Q9	-0.731934136	4.803317345	-1.325045827	0.203808503	0.46979835	-6.068248636	non
Codeine	0.414100094	10.96056602	1.553607494	0.13987531	0.390556191	-6.068301323	non
DG(20:2(11Z,14Z)/20:4(5Z,8Z,11Z,14Z)/0:0)	0.131043357	3.487395097	1.008850112	0.328093083	0.579168164	-6.069221146	non
Dopamine 3-O-sulfate	0.470837675	8.167772974	1.507499745	0.151214423	0.407100309	-6.070772016	non
PC(22:2(13Z,16Z)/18:3(9Z,12Z,15Z))	0.177365191	6.539396993	1.488376507	0.156137694	0.410661458	-6.071225907	non
PG(18:2(9Z,12Z)/18:2(9Z,12Z))	0.335311123	2.732075732	0.654260576	0.522257945	0.73519082	-6.071496811	non
PC(P-18:1(11Z)/20:5(5Z,8Z,11Z,14Z,17Z))	0.355153524	6.664878398	1.493888509	0.154705137	0.408518253	-6.071671664	non
6-trans-12-epi-Leukotriene B4	-0.378914396	4.547478003	-1.294231156	0.21399431	0.479598663	-6.072232137	non
PC(14:0/20:4(8Z,11Z,14Z,17Z))	0.140859225	2.388216801	0.442511937	0.664055279	0.833247949	-6.072721648	non
Isoflurane	0.101997339	8.530263582	1.505903364	0.151620396	0.407100309	-6.075080015	non
gamma-Glutamylglycine	0.222555915	5.22025608	1.374339059	0.188323073	0.448735985	-6.075802118	non
Dextrothyroxine	0.355305411	4.001616795	1.173729639	0.257716395	0.518211715	-6.075867301	non
Tetrahydrobiopterin	0.121081575	5.639854864	1.420111578	0.174808716	0.433110174	-6.076041644	non
PC(20:4(5Z,8Z,11Z,14Z)/20:1(11Z))	0.103193174	6.696323588	1.492475487	0.155071332	0.409075099	-6.07633598	non
N-Ribosylhistidine	-0.157792843	6.311282503	-1.468433999	0.161413067	0.41764493	-6.079847302	non
Procyclidine	0.095005738	6.513795565	1.480529887	0.158196018	0.411542544	-6.080139865	non
PC(22:2(13Z,16Z)/18:0)	0.141308154	6.988173933	1.499687215	0.15320989	0.408518253	-6.080961935	non
Clavulanate	-0.40551406	8.216517252	-1.500236112	0.153068978	0.408518253	-6.081343255	non
Ropivacaine	0.35679524	3.242181553	0.885389087	0.389087826	0.637754471	-6.08577039	non
3-Hydroxycapric acid	0.19356215	7.944518917	1.495784179	0.154214991	0.408518253	-6.086269154	non
Biperiden	0.374879829	7.019236417	1.495652199	0.154249074	0.408518253	-6.08641879	non
PC(P-18:0/18:0)	0.826800845	4.030250959	1.153392421	0.265725359	0.526368987	-6.086961178	non
4-(Methylnitrosamino)-1-(3-pyridyl)-1-butanone	0.315556823	4.749853286	1.315140573	0.207039726	0.47283397	-6.088586692	non
Iduronic acid	-0.431133515	8.358774614	-1.494820057	0.154464114	0.408518253	-6.089215136	non
Desaminotyrosine	0.130041658	6.697208958	1.481909034	0.157832617	0.411514878	-6.090966835	non
Doxapram	-0.303804146	4.369045488	-1.247525102	0.230194706	0.491459575	-6.091512208	non
PC(18:2(9Z,12Z)/22:0)	-0.370023567	10.82061769	-1.532080908	0.145077038	0.399960652	-6.091542124	non
Benazepril	-0.268341436	4.943684121	-1.332708628	0.201336489	0.465351204	-6.092188526	non
L-Phenylalanine	0.15557152	11.19901403	1.54449467	0.142057861	0.394591516	-6.094248879	non
Lymecycline	0.486469888	4.550502802	1.279558584	0.21898383	0.482937553	-6.09441242	non
Kojibiose	0.168891292	4.30971267	1.236487234	0.234159727	0.495712934	-6.097760479	non
Mitomycin	0.411076105	8.93388094	1.489255354	0.155908548	0.410661458	-6.098865823	non
PI(16:0/16:1(9Z))	-0.785443555	5.349995705	-1.368697206	0.190045886	0.450359661	-6.098977839	non
Sialyllacto-N-tetraose b	-0.165095428	5.871666809	-1.422751172	0.174054166	0.432241242	-6.099475327	non
MG(0:0/20:4(5Z,8Z,11Z,14Z)/0:0)	0.34537633	8.194261805	1.486595904	0.156602819	0.410661458	-6.099600007	non
Benzthiazide	0.229266341	6.45485541	1.462702982	0.1629561	0.418649556	-6.099818445	non
O-Desmethylverapamil (D-702)	0.389564835	3.829572686	1.098360956	0.288335917	0.543975693	-6.100088469	non
DG(18:0/20:2(11Z,14Z)/0:0)	-0.575558418	5.593114881	-1.391714109	0.183096594	0.443106915	-6.100721613	non
PC(20:2(11Z,14Z)/14:0)	0.103147013	8.036996471	1.484555135	0.157137319	0.411220809	-6.101633125	non
Eicosapentaenoic acid	0.113544735	4.353823645	1.242420583	0.232021804	0.493719028	-6.102376873	non
Epirubicin	-0.127664523	5.299224553	-1.361897195	0.192139239	0.453313076	-6.10309089	non
PC(14:1(9Z)/22:2(13Z,16Z))	0.207167561	4.107249183	1.182124608	0.254464379	0.514213417	-6.103264346	non
Cabergoline	0.637677545	4.86872974	1.313410859	0.20760814	0.473122595	-6.103797217	non
1-hydroxyoct-3-enoylglycine	0.133330088	3.51689125	0.98378896	0.339894434	0.590265563	-6.104924289	non
TG(16:0/18:0/18:2(9Z,12Z))	0.204569518	3.297616089	0.890881991	0.386221746	0.63500155	-6.105009729	non
PC(22:5(7Z,10Z,13Z,16Z,19Z)/16:1(9Z))	-0.205631032	4.235276808	-1.209518814	0.244070148	0.504744531	-6.105271542	non
PC(24:1(15Z)/18:0)	0.178743376	5.486233492	1.380934996	0.18632495	0.446151688	-6.105799762	non
DG(15:0/15:0/0:0)	0.067651598	2.30311062	0.272384283	0.788817977	0.897254942	-6.106935472	non
Propylthiouracil	0.31980864	2.772742906	0.621351131	0.543139455	0.748954278	-6.106991011	non
Sorbitol	-0.322235212	7.604426926	-1.482124375	0.157775938	0.411514878	-6.108083276	non
Chlorogenic acid	0.132905081	5.181330773	1.3449526	0.197436402	0.461203153	-6.10814731	non
DG(16:1(9Z)/18:1(9Z)/0:0)	-0.117130887	4.906409102	-1.316863616	0.206474737	0.47283397	-6.108159551	non
Clomocycline	0.171861383	11.81264397	1.558350032	0.138750683	0.389974528	-6.108292633	non
PC(16:0/20:0)	-0.352555963	3.542696127	-0.980047711	0.341681499	0.592088123	-6.108796973	non
6-octenoylglycine	-0.151666648	3.592797478	-1.005339097	0.329728677	0.580459859	-6.109782767	non
PE(20:4(5Z,8Z,11Z,14Z)/18:0)	0.528007511	4.926975918	1.315828921	0.206813869	0.47283397	-6.110912009	non
PC(16:1(9Z)/18:3(9Z,12Z,15Z))	0.195648867	3.667289164	1.034220903	0.316445705	0.571810444	-6.111136596	non
DG(20:2(11Z,14Z)/16:1(9Z)/0:0)	0.206088911	6.085103346	1.43015328	0.171952423	0.430685827	-6.111854726	non
Imidazolelactic acid	0.232984881	6.024845023	1.425752062	0.173199577	0.431154566	-6.112007723	non
PE(24:1(15Z)/14:0)	0.361408757	6.114077616	1.431259627	0.171640083	0.430239115	-6.112734265	non
8-Hydroxyguanosine	0.095931284	7.235251472	1.480247796	0.158270433	0.411542544	-6.112851379	non
DG(20:4(8Z,11Z,14Z,17Z)/18:1(9Z)/0:0)	0.156013218	3.728149978	1.053210056	0.307924694	0.563594807	-6.114285429	non
DG(16:0/18:1(11Z)/0:0)	0.126817664	4.2388046	1.205746896	0.24548165	0.505283064	-6.114918203	non
PC(18:3(9Z,12Z,15Z)/P-18:1(9Z))	-0.169712031	6.799358243	-1.467139551	0.161760527	0.418036073	-6.11640242	non
Phytosphingosine	-1.207543698	3.640381122	-0.943126071	0.359670795	0.607552485	-6.117845021	non
Zileuton	0.021417832	2.231859106	0.060011022	0.952891646	0.985219	-6.12038787	non
DG(18:1(9Z)/16:0/0:0)	-0.259999492	4.414745188	-1.232848146	0.235478524	0.496794704	-6.121277069	non
PG(18:3(9Z,12Z,15Z)/20:3(8Z,11Z,14Z))	0.120361772	3.979704734	1.127831408	0.276056049	0.53319927	-6.123165483	non
DG(20:4(8Z,11Z,14Z,17Z)/20:3(8Z,11Z,14Z)/0:0)	-0.267068336	2.739836374	-0.571901572	0.575353378	0.773967196	-6.123324636	non
PC(20:4(5Z,8Z,11Z,14Z)/18:2(9Z,12Z))	0.10486478	6.751961928	1.460491539	0.163554765	0.41913356	-6.123554614	non
Phenytoin	0.164174949	5.827234887	1.4004529	0.180512782	0.43956977	-6.124999786	non
DG(22:0/16:0/0:0)	0.59817777	2.770323293	0.575681504	0.572856316	0.773693956	-6.126902142	non
1,3-octadienoylglycine	-0.108681622	8.185267481	-1.466397283	0.161960047	0.418036073	-6.127253222	non
3-Sulfodeoxycholic acid	0.148051307	4.249055715	1.197451387	0.248608002	0.507903272	-6.127333924	non
PI(18:0/22:6(4Z,7Z,10Z,13Z,16Z,19Z))	-0.332860231	3.323421031	-0.865796547	0.399425995	0.646776032	-6.128776808	non
MG(0:0/20:1(11Z)/0:0)	0.585483285	5.278536787	1.339503213	0.19916466	0.463754695	-6.129090152	non
5-hydroxyoct-6-enoylglycine	0.221877734	4.218465634	1.187777509	0.252292263	0.511433368	-6.129121845	non
DG(20:1(11Z)/20:4(8Z,11Z,14Z,17Z)/0:0)	0.278029031	7.206266562	1.466470195	0.16194044	0.418036073	-6.131142723	non
PC(14:0/20:3(5Z,8Z,11Z))	-0.257467167	5.217569075	-1.331089415	0.20185684	0.465968593	-6.131295436	non
Raloxifene	0.248288619	2.750211575	0.567147212	0.578502146	0.776901042	-6.131718691	non
PIP(16:2(9Z,12Z)/18:0)	0.183847937	7.431970363	1.46593284	0.162084993	0.418036073	-6.132268598	non
6-(3-carboxyphenoxy)-3,4,5-trihydroxyoxane-2-carboxylic acid	0.16376086	5.376692675	1.346986816	0.196794346	0.460573357	-6.133300227	non
PC(20:3(5Z,8Z,11Z)/P-18:1(9Z))	0.128864621	6.255719849	1.425229876	0.173348037	0.431154566	-6.133787754	non
4-Hydroxypropofol	-0.598938928	5.586733255	-1.364723856	0.191266818	0.452251659	-6.134933462	non
5-Phenylvaleric acid	0.306010987	4.894965555	1.291455327	0.214931302	0.479598663	-6.13830153	non
7-Methyluric acid	0.665300861	6.217898083	1.417611965	0.175525715	0.433548516	-6.138597218	non
DG(18:1(9Z)/20:4(8Z,11Z,14Z,17Z)/0:0)	-0.286468899	2.902506101	-0.638787942	0.532018968	0.742568562	-6.140151405	non
N-Acetylproline	-0.217642567	4.370041229	-1.208516835	0.244444492	0.504744531	-6.140989517	non
PC(14:1(9Z)/22:5(7Z,10Z,13Z,16Z,19Z))	0.253996984	12.37801467	1.557097388	0.139046986	0.389974528	-6.14117283	non
DG(18:3(9Z,12Z,15Z)/20:1(11Z)/0:0)	0.311068705	5.661269322	1.371873475	0.189074412	0.449384114	-6.141302026	non
Argininosuccinic acid	0.306719889	7.438536917	1.458212419	0.164173651	0.419800311	-6.142521049	non
PC(18:0/20:1(11Z))	-0.144923737	3.743951492	-1.027989715	0.319278474	0.572739206	-6.143092912	non
Ethoxzolamide	0.091525389	7.200626377	1.457847312	0.164272973	0.419800311	-6.143146575	non
PC(18:0/22:4(7Z,10Z,13Z,16Z))	0.078567188	2.366932439	0.206275349	0.839183411	0.926782831	-6.143234845	non
Ritonavir	0.174268668	5.355017073	1.334976491	0.200609491	0.46450389	-6.145368439	non
6-(5-carboxy-2,3-dihydroxyphenoxy)-3,4,5-trihydroxyoxane-2-carboxylic acid	0.130132105	4.366259063	1.207710443	0.244746084	0.504744531	-6.146295536	non
N-a-Acetyl-L-arginine	0.501153282	5.712699129	1.370881757	0.189377302	0.449771091	-6.147210856	non
MG(22:5(7Z,10Z,13Z,16Z,19Z)/0:0/0:0)	0.191186692	4.981318135	1.291669045	0.214859045	0.479598663	-6.149396105	non
PC(20:0/16:0)	-0.133416036	6.239470865	-1.410792526	0.177494061	0.435720391	-6.151234361	non
TG(16:0/16:0/18:2(9Z,12Z))	-0.38772593	6.67657778	-1.433901245	0.170896192	0.429727628	-6.152349795	non
PC(20:2(11Z,14Z)/20:4(5Z,8Z,11Z,14Z))	0.13158087	5.757080629	1.372667195	0.188832278	0.449384114	-6.15309041	non
Stearidonic acid	0.526965942	5.184992496	1.309672268	0.208840941	0.474584757	-6.153897338	non
Gold	-0.007322267	2.335922911	-0.016898863	0.986726687	0.995573679	-6.154554172	non
PI(18:0/20:4(5Z,8Z,11Z,14Z))	0.25549152	6.42659966	1.418146077	0.175372307	0.433548516	-6.157467176	non
PC(18:3(6Z,9Z,12Z)/22:0)	0.203863603	3.095472412	0.726873012	0.477827361	0.703568342	-6.157470567	non
R-138727	-0.190960843	7.290118504	-1.446243392	0.167455586	0.42438823	-6.158542893	non
PE(20:0/18:1(9Z))	-0.306142078	8.577640696	-1.441127716	0.168874701	0.426807336	-6.16352926	non
PE(20:1(11Z)/20:4(5Z,8Z,11Z,14Z))	-0.253930795	4.334550547	-1.179858352	0.255339176	0.515656664	-6.16363276	non
DG(18:2(9Z,12Z)/20:2(11Z,14Z)/0:0)	-0.163830243	2.903680909	-0.603427817	0.554701215	0.759874403	-6.164971671	non
PC(22:2(13Z,16Z)/16:1(9Z))	-0.134191984	4.447247903	-1.204141816	0.246084193	0.506198811	-6.166371781	non
Trimethylsilyl heptadecanoic acid	0.114123907	8.393591808	1.437992899	0.16974919	0.427837245	-6.167178179	non
PC(24:1(15Z)/18:3(9Z,12Z,15Z))	0.216755492	3.893675565	1.058112068	0.305752266	0.562885613	-6.167254726	non
Dihydroxyacetone phosphate	-0.196664384	2.561964606	-0.343123428	0.735982152	0.871400697	-6.167625376	non
PC(20:1(11Z)/18:3(6Z,9Z,12Z))	-0.247786784	4.969662541	-1.273473636	0.221079742	0.483808445	-6.169350677	non
PC(18:3(9Z,12Z,15Z)/P-18:1(11Z))	0.104764687	6.484297359	1.412169102	0.177095285	0.435720391	-6.170168724	non
DG(20:3(8Z,11Z,14Z)/18:3(6Z,9Z,12Z)/0:0)	-0.42339337	8.107616556	-1.434795413	0.170644991	0.429727628	-6.170653298	non
AICAR	-0.137500954	4.323901032	-1.173684225	0.257734073	0.518211715	-6.171506631	non
Flavin mononucleotide	0.154298616	6.860630074	1.427070205	0.172825285	0.431154566	-6.174437607	non
PC(20:0/22:5(7Z,10Z,13Z,16Z,19Z))	-0.216579401	8.803581633	-1.432662836	0.171244603	0.429990259	-6.175599974	non
DG(20:5(5Z,8Z,11Z,14Z,17Z)/20:1(11Z)/0:0)	-0.195228506	3.369203811	-0.836892636	0.415004981	0.658715271	-6.175911654	non
PC(P-16:0/20:2(11Z,14Z))	-0.179520951	3.68221488	-0.970107969	0.346461335	0.596083077	-6.176597731	non
Halazepam	0.394354028	5.575761556	1.334178215	0.200865151	0.464681556	-6.17736567	non
Androsterone	0.255437992	2.500644977	0.24397546	0.81035739	0.910847899	-6.177883581	non
myo-Inositol 6-phosphate	0.131557735	7.266032202	1.432268508	0.171355665	0.429990259	-6.178161697	non
Tenoxicam	0.275619312	3.829924846	1.023611892	0.321279532	0.573445568	-6.179437308	non
PC(P-18:1(11Z)/P-18:1(9Z))	-0.274196819	5.792452297	-1.353366581	0.194791576	0.457553586	-6.179915624	non
Cer(d18:0/23:0)	-0.208427244	3.542588414	-0.908581454	0.377082929	0.625743299	-6.180453988	non
Miglitol	-0.222890627	9.507640104	-1.432086694	0.171406892	0.429990259	-6.181158577	non
Glycocholic acid	0.110620054	6.462065987	1.400277077	0.180564474	0.43956977	-6.184148411	non
1,2-Benzenediol bis(trimethylsilyl) ether	0.080389943	8.708129615	1.421807496	0.174323617	0.432575837	-6.190175789	non
PG(18:0/18:1(11Z))	-0.146303289	5.202519283	-1.281608374	0.218281327	0.48205044	-6.190452565	non
PA(16:0/18:1(9Z))	0.877560266	6.088543877	1.366023754	0.190866691	0.451638131	-6.190773116	non
DG(20:0/18:3(6Z,9Z,12Z)/0:0)	0.398979064	6.774219499	1.410612519	0.177546261	0.435720391	-6.190848787	non
Zileuton sulfoxide	-0.096486131	6.789962664	-1.41162873	0.177251736	0.435720391	-6.190901705	non
Flutamide	0.295578958	3.310841345	0.791034238	0.440517944	0.680315019	-6.192924024	non
DG(14:0/24:1(15Z)/0:0)	-0.150163564	4.928090987	-1.249456672	0.229506256	0.49031576	-6.19336372	non
Pentacosanoic acid	0.400635927	4.266282058	1.138684151	0.271633667	0.532858534	-6.193655605	non
MG(24:1(15Z)/0:0/0:0)	-0.599364069	6.516784239	-1.392310449	0.182919323	0.443106915	-6.194324099	non
DG(18:1(9Z)/18:0/0:0)	-0.120339533	7.46702059	-1.417659415	0.175512082	0.433548516	-6.196793172	non
Diazepam	-0.210686816	6.729357301	-1.403019595	0.179759545	0.438607826	-6.198192019	non
hydroxyvalerylglycine	0.17978015	5.537597538	1.313441463	0.207598072	0.473122595	-6.199340751	non
DG(20:2(11Z,14Z)/20:4(8Z,11Z,14Z,17Z)/0:0)	0.119692748	2.505286639	0.132599753	0.896166793	0.954222257	-6.20119247	non
Pyrimethamine	0.165813483	3.264939795	0.757341765	0.459877702	0.69160039	-6.202061883	non
PC(P-16:0/20:1(11Z))	0.18288857	4.103274579	1.090065321	0.291864393	0.546458639	-6.203697603	non
Gemcitabine	-0.111604116	6.030562893	-1.354531652	0.194427606	0.457065215	-6.205345866	non
Enterolactone	0.165043704	4.257777018	1.130170803	0.275098245	0.533159456	-6.205455715	non
(R)-2-Hydroxycaprylic acid	0.133103547	9.705677685	1.415461343	0.176144531	0.434462843	-6.206390938	non
Colistin	-0.328849452	6.509351759	-1.382643654	0.185810151	0.44525104	-6.209183134	non
Methocarbamol	-0.198754262	7.620882659	-1.406633456	0.178703342	0.437360086	-6.209850176	non
Miglustat	0.184103074	7.158863675	1.407410294	0.178476962	0.437139226	-6.210224132	non
DG(20:3(5Z,8Z,11Z)/20:4(8Z,11Z,14Z,17Z)/0:0)	-0.282760994	3.151644591	-0.676909988	0.508153171	0.726209986	-6.210639285	non
PI(20:4(8Z,11Z,14Z,17Z)/18:1(9Z))	0.15969843	6.562313153	1.384261598	0.185323745	0.44525104	-6.212693654	non
Allopregnanolone	-0.14268426	4.748143766	-1.209966824	0.243902913	0.504744531	-6.214871556	non
Cefmetazole	0.195253389	6.567251515	1.382784859	0.185767659	0.44525104	-6.214922558	non
Olmesartan	0.083062173	9.649183251	1.408196154	0.178248191	0.436912168	-6.21494545	non
Octreotide	0.10483489	7.091833508	1.401847345	0.180103242	0.439112764	-6.216401996	non
PI(18:0/20:3(5Z,8Z,11Z))	-1.06220706	4.223514315	-1.051024222	0.308896993	0.564202642	-6.216984789	non
PC(18:4(6Z,9Z,12Z,15Z)/24:1(15Z))	0.095830729	4.409648398	1.154386817	0.265329436	0.526328346	-6.217392155	non
PC(14:0/P-18:1(11Z))	0.484740767	3.687668511	0.924837772	0.368819014	0.616490293	-6.217419465	non
PE(22:1(13Z)/14:1(9Z))	-0.752185345	4.90673645	-1.217681592	0.241036925	0.501600498	-6.218290225	non
DG(18:2(9Z,12Z)/18:3(6Z,9Z,12Z)/0:0)	0.428640632	5.138794229	1.25151687	0.22877373	0.489912214	-6.218575405	non
Benzquinamide	0.181878742	4.038577163	1.055155843	0.307061042	0.563413146	-6.219645041	non
Lead	-0.29054007	3.720936286	-0.934692033	0.363870129	0.611400828	-6.220586598	non
PI(18:0/20:2(11Z,14Z))	0.412812921	5.522479589	1.29145783	0.214930455	0.479598663	-6.223126518	non
8-nonenoylglycine	0.161561178	6.576945027	1.376071387	0.187796624	0.448338261	-6.224407175	non
Hydroxylansoprazole	-0.221752291	9.189552005	-1.396888379	0.181563105	0.44099783	-6.224474592	non
Fluoxetine	-0.441016922	4.834847042	-1.208359856	0.24450318	0.504744531	-6.224577286	non
PE(22:4(7Z,10Z,13Z,16Z)/P-18:1(11Z))	-0.247927051	4.828774282	-1.208456348	0.244467104	0.504744531	-6.227118661	non
PC(22:5(4Z,7Z,10Z,13Z,16Z)/P-18:1(11Z))	0.298630164	3.524939755	0.850422608	0.407663923	0.651749727	-6.227697262	non
Metharbital	0.637551552	6.363009574	1.357517954	0.193497177	0.455512782	-6.229587716	non
PC(P-18:0/18:1(11Z))	0.851829103	7.765029552	1.390556641	0.183441067	0.443106915	-6.230840372	non
PC(24:1(15Z)/P-18:1(9Z))	-0.157658691	5.25552394	-1.253019217	0.228240706	0.489893654	-6.232438729	non
DG(20:1(11Z)/18:2(9Z,12Z)/0:0)	0.328370969	7.256604662	1.390239948	0.183535409	0.443106915	-6.23327727	non
PE(P-16:0/20:4(5Z,8Z,11Z,14Z))	-0.238626598	4.792994705	-1.196624765	0.248921198	0.508128396	-6.235567277	non
Hawkinsin	-0.274262518	3.246868796	-0.693006021	0.498263976	0.718421924	-6.236096013	non
DG(18:1(11Z)/18:1(9Z)/0:0)	-0.142190304	5.368661044	-1.263067349	0.22470058	0.487254967	-6.236414441	non
Reserpine	0.158529163	5.725921654	1.304020483	0.210715645	0.477313404	-6.236422377	non
DG(16:1(9Z)/22:5(7Z,10Z,13Z,16Z,19Z)/0:0)	-0.245874755	6.3012317	-1.347478077	0.196639542	0.460573357	-6.238493485	non
DG(20:1(11Z)/20:5(5Z,8Z,11Z,14Z,17Z)/0:0)	0.214520842	5.736788144	1.302843209	0.211107822	0.477313404	-6.239077326	non
Equol	0.40635411	5.186512277	1.239287139	0.233148957	0.495278887	-6.239580484	non
TG(16:0/18:2(9Z,12Z)/20:0)	0.196844522	4.961498682	1.214420822	0.242245096	0.502767347	-6.23970934	non
Taurocholic acid 3-sulfate	-0.193194344	4.082286313	-1.044567012	0.311782262	0.567628399	-6.239965154	non
Calcitriol	0.106140917	11.76814947	1.46173747	0.163217253	0.418649556	-6.240799044	non
DG(20:0/18:1(11Z)/0:0)	0.175439232	5.430709923	1.265862758	0.223723392	0.486144827	-6.242184733	non
Lansoprazole sulfone	-1.025127933	4.455508135	-1.092057438	0.291014174	0.546458639	-6.243909419	non
Alpha-Lactose	-0.617975937	3.270958053	-0.67462776	0.509564431	0.726567662	-6.244233933	non
DG(18:1(11Z)/20:2(11Z,14Z)/0:0)	-0.172752586	4.409028952	-1.125320129	0.277086999	0.534140152	-6.245487138	non
PC(20:4(5Z,8Z,11Z,14Z)/22:2(13Z,16Z))	-0.299233776	2.976971441	-0.50388897	0.621221431	0.805630862	-6.246149387	non
DG(22:2(13Z,16Z)/16:1(9Z)/0:0)	-0.467242857	5.184310182	-1.233065994	0.235399414	0.496794704	-6.247079829	non
PC(20:5(5Z,8Z,11Z,14Z,17Z)/22:1(13Z))	-0.128780333	4.244653342	-1.085721723	0.293724544	0.548342738	-6.247619858	non
Minaprine	-0.172115841	12.72365504	-1.494282509	0.154603157	0.408518253	-6.248934858	non
N-Acetylglutamine	0.090613657	5.196212054	1.231244952	0.236061342	0.497254398	-6.249879201	non
DG(18:1(11Z)/18:0/0:0)	-0.200970032	5.693898097	-1.287491411	0.21627495	0.479598663	-6.251209203	non
PC(P-18:1(9Z)/18:1(11Z))	0.485457305	5.551695546	1.270834359	0.221993707	0.484253936	-6.251660904	non
PG(18:2(9Z,12Z)/22:4(7Z,10Z,13Z,16Z))	-0.650721723	5.505000914	-1.262438342	0.224920922	0.487254967	-6.251741635	non
DG(20:3(8Z,11Z,14Z)/18:0/0:0)	-0.15599427	9.043923819	-1.374143857	0.188382469	0.448735985	-6.253295139	non
DG(22:1(13Z)/18:4(6Z,9Z,12Z,15Z)/0:0)	0.184501384	4.098736254	1.039243393	0.314175616	0.569310329	-6.255182243	non
6-(2-carboxy-5-hydroxyphenoxy)-3,4,5-trihydroxyoxane-2-carboxylic acid	-0.162142221	6.061603515	-1.316512186	0.206589872	0.47283397	-6.256319675	non
(13Z,13'Z,3R,3'R,6'R)-Lutein	0.183954047	5.477358132	1.256788742	0.226907567	0.489599632	-6.260067936	non
PE(20:1(11Z)/P-18:1(11Z))	-0.798286367	5.522899462	-1.25605355	0.227167098	0.489599632	-6.260144338	non
Eucalyptol	-0.489664454	4.846227538	-1.177637175	0.256198795	0.516742669	-6.260783697	non
PC(20:4(8Z,11Z,14Z,17Z)/18:0)	0.256260257	3.162208574	0.610905665	0.549861483	0.755500737	-6.260926605	non
5-hydroxyoct-3-enoylglycine	0.123160491	6.943394083	1.360727876	0.192501074	0.453833296	-6.265289895	non
Deferoxamine	-0.358415884	10.78860087	-1.403527613	0.179610763	0.438578069	-6.265526629	non
Mesalazine	0.676723973	3.370489195	0.704765794	0.491110384	0.71226533	-6.267392263	non
PI(16:0/20:2(11Z,14Z))	-0.111276697	3.400384429	-0.736862277	0.471896622	0.698598456	-6.268984351	non
6-hydroxyphenylpropionylglycine	-0.137560883	7.255348861	-1.362263811	0.192025906	0.453313076	-6.26946167	non
Sucralfate	-0.426321945	8.632618486	-1.360126728	0.192687307	0.453939064	-6.270184318	non
PC(16:1(9Z)/22:2(13Z,16Z))	0.214559965	4.197284764	1.052742772	0.308132364	0.563594807	-6.270364399	non
PC(P-18:1(9Z)/24:0)	0.218354425	5.334461221	1.230118677	0.236471452	0.497254398	-6.270845055	non
Prostaglandin A1	-0.168712723	4.802604739	-1.167743571	0.26005449	0.520595986	-6.27111886	non
PC(18:1(11Z)/18:4(6Z,9Z,12Z,15Z))	0.084941639	2.693622514	0.077501447	0.939187636	0.978136636	-6.27230623	non
PE(16:0/18:2(9Z,12Z))	-0.268290966	4.553612958	-1.126456015	0.276620331	0.533790795	-6.273095925	non
DG(14:1(9Z)/20:3(8Z,11Z,14Z)/0:0)	-0.319990708	5.885319354	-1.286805778	0.21650803	0.479752038	-6.273463347	non
DG(20:1(11Z)/20:3(5Z,8Z,11Z)/0:0)	0.123503792	4.400847929	1.099765462	0.287741655	0.543173694	-6.275323005	non
TG(18:0/20:1(11Z)/20:1(11Z))	-0.225127179	11.88731327	-1.440886706	0.168941801	0.426807336	-6.27553277	non
PE(22:2(13Z,16Z)/18:3(9Z,12Z,15Z))	0.10633179	3.357147757	0.706358248	0.490146345	0.711643733	-6.276286127	non
PC(16:1(9Z)/14:1(9Z))	-0.155888629	11.99494456	-1.444468622	0.1679468	0.425297458	-6.276653684	non
Marimastat	0.180708624	4.148319425	1.029747192	0.318477669	0.572139291	-6.279844369	non
DG(16:1(9Z)/18:3(6Z,9Z,12Z)/0:0)	0.15148236	8.202211487	1.350706286	0.195624711	0.459174668	-6.280251743	non
DG(20:3(8Z,11Z,14Z)/16:0/0:0)	0.009077617	2.715789564	0.028726991	0.977438369	0.991688376	-6.28256194	non
TG(18:1(9Z)/18:2(9Z,12Z)/18:2(9Z,12Z))	0.192506069	4.592414695	1.129041866	0.275560148	0.533159456	-6.282606888	non
PG(16:1(9Z)/18:1(11Z))	-0.135356661	6.057331586	-1.294736906	0.213823941	0.479598663	-6.283128527	non
PC(22:0/18:0)	0.160741971	3.740154999	0.880804085	0.39149102	0.639767281	-6.283270616	non
PI(20:4(8Z,11Z,14Z,17Z)/20:0)	0.10808155	2.921768064	0.381656895	0.707747757	0.857249772	-6.284336945	non
DG(20:2(11Z,14Z)/20:2(11Z,14Z)/0:0)	0.211337809	3.987412954	0.971434378	0.345820803	0.596083077	-6.28575992	non
DG(20:0/14:1(9Z)/0:0)	-0.132441759	3.951569153	-0.955297229	0.353669769	0.601182439	-6.287408197	non
11(R)-HETE	0.448172389	8.577643485	1.346434688	0.196968447	0.460645072	-6.287908547	non
Cer(d18:0/20:0)	-0.148572756	3.286361394	-0.644402076	0.528465569	0.740652627	-6.288011451	non
PE(18:1(11Z)/20:1(11Z))	-0.206310083	3.019889772	-0.451928283	0.657400087	0.828458273	-6.289303088	non
Methylhydroxygliclazide	-0.144563702	4.409539693	-1.083760447	0.294567313	0.549277377	-6.291402562	non
PC(18:3(6Z,9Z,12Z)/18:1(9Z))	-0.112215651	5.031787597	-1.17686222	0.256499228	0.516753323	-6.291756145	non
Propofol	0.164940873	5.908173049	1.27516201	0.220496621	0.483616564	-6.292862358	non
PE(22:4(7Z,10Z,13Z,16Z)/18:1(11Z))	0.205384278	8.563444225	1.342718038	0.198143627	0.46238313	-6.292904608	non
Oseltamivir	-0.266221951	3.350378297	-0.666838871	0.514397741	0.730443563	-6.295016848	non
PC(18:3(6Z,9Z,12Z)/18:1(11Z))	0.30178089	5.973859236	1.277934454	0.219541713	0.483087596	-6.295749912	non
PC(18:2(9Z,12Z)/20:4(5Z,8Z,11Z,14Z))	0.238374431	6.656952044	1.321714852	0.204890595	0.471277721	-6.299275336	non
PC(22:1(13Z)/20:3(8Z,11Z,14Z))	0.184171955	7.764133408	1.334869654	0.200643692	0.46450389	-6.301167646	non
PC(22:0/18:1(11Z))	-0.328885411	4.812629798	-1.136570107	0.272490925	0.533159456	-6.304858782	non
p-Octopamine	0.084054953	5.053873101	1.16732921	0.260216928	0.520595986	-6.305498915	non
Adrenic acid	0.309112653	4.374841179	1.061974538	0.304048394	0.561091606	-6.306406416	non
Pyridoxal	0.142935809	3.050587	0.444343937	0.662758175	0.831945465	-6.307453896	non
DG(18:2(9Z,12Z)/22:5(7Z,10Z,13Z,16Z,19Z)/0:0)	-0.043797466	2.888262305	-0.271241729	0.789680979	0.897839537	-6.308169329	non
PC(20:2(11Z,14Z)/20:3(8Z,11Z,14Z))	0.086892203	5.999704974	1.270067302	0.222259889	0.484505434	-6.308527961	non
PI(20:0/20:4(5Z,8Z,11Z,14Z))	-0.07341074	2.914706021	-0.301695878	0.766778287	0.887252281	-6.309073305	non
Dihydrotestosterone	-0.243784487	12.4461619	-1.438583837	0.169584058	0.427756803	-6.309487324	non
PC(22:4(7Z,10Z,13Z,16Z)/16:1(9Z))	0.169557935	5.684775148	1.239726558	0.232990635	0.495278887	-6.309519629	non
Mupirocin	0.236596191	5.532096433	1.219452649	0.240382671	0.500888225	-6.312380109	non
Verapamil	-0.337130217	6.70072118	-1.311962826	0.208084941	0.473201661	-6.312410994	non
5-hydroxyoct-5-enoylglycine	0.101918278	5.371268815	1.198697778	0.248136332	0.507903272	-6.31303393	non
PG(16:1(9Z)/22:4(7Z,10Z,13Z,16Z))	0.175875326	4.606506236	1.103294055	0.286252664	0.541317612	-6.313285022	non
PG(18:0/22:5(4Z,7Z,10Z,13Z,16Z))	0.395545915	6.358107438	1.291161307	0.215030739	0.479598663	-6.31419871	non
Fructosamine	0.177174953	5.094830294	1.161799731	0.262391976	0.523317165	-6.316954462	non
TG(18:2(9Z,12Z)/20:0/20:0)	0.246865655	3.974553435	0.932588513	0.364922695	0.612528372	-6.317841553	non
PE(20:4(5Z,8Z,11Z,14Z)/P-18:0)	-0.163124415	3.359051236	-0.639753631	0.531406803	0.742535789	-6.318653357	non
PE(22:2(13Z,16Z)/16:0)	-0.361233331	7.313321368	-1.321821765	0.204855792	0.471277721	-6.319730147	non
Piperacillin	-0.209947463	7.034399277	-1.319231479	0.205700312	0.4726153	-6.319747104	non
Tetracycline	0.155213401	4.989804192	1.144322231	0.269357292	0.53061734	-6.323308439	non
ADP	0.151669159	6.08419894	1.264164527	0.224316643	0.487005234	-6.323590776	non
PC(14:0/18:2(9Z,12Z))	-0.152909003	10.25890866	-1.33838503	0.199520783	0.464247271	-6.324512023	non
Benzatropine	-1.062610551	7.813235463	-1.31420712	0.207346321	0.473122595	-6.329487039	non
Histidylproline diketopiperazine	0.08522297	9.514463203	1.317015403	0.206425024	0.47283397	-6.330273916	non
DG(20:4(8Z,11Z,14Z,17Z)/20:2(11Z,14Z)/0:0)	-0.454537205	4.313640756	-1.007887296	0.328541033	0.57964025	-6.331361832	non
PE(22:4(7Z,10Z,13Z,16Z)/P-18:0)	0.231234535	3.569252494	0.741303461	0.46927418	0.697879237	-6.33236294	non
DG(22:6(4Z,7Z,10Z,13Z,16Z,19Z)/14:0/0:0)	0.236837074	4.846210161	1.118179725	0.280034035	0.537592764	-6.333555414	non
Tafluprost free acid	0.534719678	10.42499667	1.335698449	0.200378498	0.46450389	-6.335506069	non
3-trans,5-cis-Octadienoyl-CoA	0.171169205	6.312305339	1.269377109	0.222499612	0.484698952	-6.337631876	non
PC(18:1(11Z)/22:5(4Z,7Z,10Z,13Z,16Z))	-0.239327361	5.116072227	-1.146075167	0.268652475	0.529879053	-6.337632724	non
Cefalotin	0.128980162	4.922158562	1.122180438	0.27837997	0.536219605	-6.339316918	non
PI(20:1(11Z)/18:1(11Z))	0.139409836	6.469314982	1.277845888	0.219572167	0.483087596	-6.34026157	non
Monoethyl phthalate	0.301644574	5.136866921	1.145662361	0.26881833	0.529880698	-6.34067359	non
PC(20:0/22:4(7Z,10Z,13Z,16Z))	0.083323282	5.538491675	1.19606477	0.249133545	0.508238762	-6.340820097	non
Anabasine	0.1123244	5.279103283	1.161813233	0.262386648	0.523317165	-6.341811145	non
PC(P-16:0/18:4(6Z,9Z,12Z,15Z))	-0.183666961	4.886851118	-1.114632114	0.281506882	0.537896757	-6.341831524	non
Mono-(2-ethyl-5-hydroxyhexyl) phthalate	-0.131994319	6.641644117	-1.285944644	0.216801052	0.479768727	-6.342360149	non
Lacto-N-fucoheptaose	-0.249599656	6.414783752	-1.271243316	0.221851894	0.484253936	-6.343032676	non
S-(3-Oxo-3-carboxy-n-propyl)cysteine	-0.115180368	6.084712076	-1.246930721	0.230406879	0.491514732	-6.344045555	non
PC(P-18:1(9Z)/P-18:0)	0.138832038	7.630414104	1.30072428	0.211815144	0.477960946	-6.345663086	non
PC(22:5(4Z,7Z,10Z,13Z,16Z)/18:1(11Z))	0.025292332	2.906084364	0.116544974	0.908674111	0.962002166	-6.346015442	non
Cer(d18:0/24:1(15Z))	0.040631062	2.917085785	0.139875923	0.890507459	0.953457636	-6.347157229	non
4-methoxy-3-(sulfooxy)benzoic acid	0.529265088	3.31495646	0.56038113	0.582998517	0.779776728	-6.347321176	non
N-Methyltryptamine	0.096344439	9.542613132	1.302474168	0.211230877	0.477313404	-6.348862238	non
Megestrol	0.095330983	9.52794537	1.3020186	0.211382863	0.477320937	-6.349206888	non
beta-Cortol	0.289441114	7.467074272	1.298722278	0.212485157	0.479136124	-6.349790643	non
L-Arabitol	0.183555907	7.670921134	1.296590758	0.213200359	0.479598663	-6.35028226	non
Prostaglandin E1	0.331760894	8.538605792	1.296846914	0.213114309	0.479598663	-6.35032662	non
Alfuzosin	-0.273501788	3.575095943	-0.709183138	0.488438963	0.710637748	-6.352461645	non
DG(20:4(8Z,11Z,14Z,17Z)/16:0/0:0)	-0.28228402	3.80224515	-0.817876839	0.425466317	0.668433685	-6.35255155	non
3'-Hydroxy-e,e-caroten-3-one	0.250591458	6.889051419	1.288557084	0.215913069	0.479598663	-6.353536753	non
Escitalopram	-0.2197347	7.071764131	-1.292553485	0.214560228	0.479598663	-6.353941133	non
PC(20:4(8Z,11Z,14Z,17Z)/20:1(11Z))	0.231096146	5.043550126	1.121558594	0.278636587	0.536392135	-6.355158685	non
DG(16:0/18:2(9Z,12Z)/0:0)	0.317546602	4.761869798	1.086240375	0.293501973	0.548342738	-6.355531287	non
Dexrazoxane	-0.116986859	7.741907981	-1.291058478	0.215065524	0.479598663	-6.356376732	non
PC(22:6(4Z,7Z,10Z,13Z,16Z,19Z)/16:0)	1.618291644	4.73444513	1.019605947	0.32311846	0.575767689	-6.356957823	non
PI(16:0/20:4(5Z,8Z,11Z,14Z))	0.115992799	7.942864012	1.288820422	0.215823719	0.479598663	-6.357464421	non
PC(16:0/14:0)	0.148724948	3.890721019	0.856569062	0.404357181	0.649195454	-6.357877328	non
PC(18:3(9Z,12Z,15Z)/18:3(6Z,9Z,12Z))	0.356457208	6.78012473	1.279799657	0.218901117	0.482937553	-6.358310342	non
TG(18:0/18:1(9Z)/18:1(9Z))	-0.856686049	4.994509967	-1.105486292	0.285330464	0.540209977	-6.358428436	non
PE(18:4(6Z,9Z,12Z,15Z)/22:0)	0.08264029	3.028720194	0.284163359	0.77993768	0.895127752	-6.358800546	non
Indinavir	-0.074779036	4.951335724	-1.106945997	0.284717638	0.539770956	-6.359292593	non
PE(18:0/22:4(7Z,10Z,13Z,16Z))	0.076637788	7.245139788	1.291372969	0.214959151	0.479598663	-6.359567381	non
MG(22:5(4Z,7Z,10Z,13Z,16Z)/0:0/0:0)	0.138091404	4.819613787	1.090338082	0.291747873	0.546458639	-6.360335129	non
Ciprofloxacin	-0.035126345	2.935374762	-0.081269955	0.936237384	0.976469493	-6.360654463	non
Pyrophosphate	0.133111631	7.654860933	1.28550933	0.216949297	0.479768727	-6.364146599	non
Etodolac	-0.390928866	9.304163469	-1.28824793	0.216018002	0.479598663	-6.364212918	non
Gluconolactone	0.306868265	7.032425377	1.284055167	0.217445088	0.480534189	-6.364267284	non
DG(22:2(13Z,16Z)/18:4(6Z,9Z,12Z,15Z)/0:0)	-0.27473957	6.462683081	-1.256601282	0.22697372	0.489599632	-6.364390987	non
PE(20:1(11Z)/20:3(5Z,8Z,11Z))	-0.219581188	4.25304731	-0.969663719	0.346676051	0.596083077	-6.364742343	non
N1,N12-Diacetylspermine	0.170499371	5.219187327	1.13280921	0.274021004	0.533159456	-6.365748851	non
3-Indolebutyric acid	0.113152094	4.682462744	1.066192868	0.302195449	0.558957135	-6.365814173	non
PI(16:0/22:2(13Z,16Z))	0.415781177	6.457151918	1.255136076	0.227491302	0.489599632	-6.366088232	non
DG(18:2(9Z,12Z)/16:0/0:0)	-0.186064439	6.934621104	-1.276734672	0.219954552	0.483087596	-6.369210399	non
PI(20:3(5Z,8Z,11Z)/20:3(8Z,11Z,14Z))	0.237419085	5.103862055	1.115653624	0.281082196	0.537896757	-6.369350923	non
DG(18:3(6Z,9Z,12Z)/18:3(6Z,9Z,12Z)/0:0)	0.092295152	5.4212065	1.155853583	0.264746249	0.526328346	-6.369440557	non
PC(18:0/16:1(9Z))	-0.22935417	6.011336494	-1.218323738	0.240799548	0.501431485	-6.370157942	non
4-nonenoylglycine	-0.133646998	9.830179178	-1.289775253	0.215499989	0.479598663	-6.370577727	non
PI(20:3(5Z,8Z,11Z)/16:0)	-0.131415651	6.89112144	-1.274237325	0.220815834	0.483784786	-6.370766205	non
TG(16:1(9Z)/18:0/20:1(11Z))	0.124306643	4.514000211	1.031055793	0.317882334	0.572139291	-6.371505585	non
PC(22:0/16:1(9Z))	0.141725466	6.155208388	1.227456115	0.237443164	0.497669712	-6.374025056	non
Taurolithocholic acid 3-sulfate	0.767401504	5.878917127	1.198291186	0.248290122	0.507903272	-6.374983272	non
N-Acetyl-glucosamine 1-phosphate	-1.181608344	10.775233	-1.319028866	0.205766487	0.4726153	-6.375006597	non
Terfenadine	0.09104632	10.22951545	1.296817258	0.21312427	0.479598663	-6.375253611	non
3-Methoxytyrosine	0.101257349	7.427258378	1.276879705	0.219904614	0.483087596	-6.377218474	non
3-O-Sulfogalactosylceramide (d18:1/24:0)	-0.231696934	11.68321844	-1.354487716	0.194441322	0.457065215	-6.378036642	non
Glucosamine	0.120811181	6.625392308	1.255753084	0.227273232	0.489599632	-6.378687706	non
Leukotriene E4	-0.175764269	7.398114738	-1.275261269	0.220462377	0.483616564	-6.37876807	non
PI(18:2(9Z,12Z)/18:1(9Z))	0.087199762	4.359530123	0.988496159	0.337655313	0.588231484	-6.379719889	non
13,14-Dihydro PGE1	-0.287181916	5.765229473	-1.186164624	0.252910562	0.512363289	-6.379812949	non
PG(18:2(9Z,12Z)/22:5(7Z,10Z,13Z,16Z,19Z))	-0.664543263	5.680928916	-1.170313573	0.25904871	0.519878379	-6.380952454	non
PG(16:0/18:3(6Z,9Z,12Z))	0.105997999	5.870253295	1.197333264	0.248652739	0.507903272	-6.381436408	non
PC(22:1(13Z)/20:0)	0.092845868	5.852597559	1.193450277	0.250126781	0.508881362	-6.38398275	non
PC(20:2(11Z,14Z)/18:1(9Z))	-0.237995643	10.33128215	-1.293508304	0.214238	0.479598663	-6.384047533	non
Guanidinosuccinic acid	0.145377647	6.318264312	1.22943711	0.236719899	0.497254398	-6.38615629	non
PI(18:1(11Z)/16:0)	0.24113779	3.318165809	0.499427172	0.624290707	0.807003809	-6.386527884	non
Celecoxib	0.270369881	6.251676186	1.223066767	0.239051817	0.499923335	-6.387691384	non
3,5-dimethoxy-4-(sulfooxy)benzoic acid	0.654896318	4.497833219	0.998152468	0.333094569	0.583824597	-6.388198455	non
Loracarbef	0.683338942	4.329027507	0.95210833	0.355235323	0.602886164	-6.388644703	non
LysoPE(20:0/0:0)	0.110040189	3.760900473	0.760186907	0.458222924	0.69150118	-6.390169865	non
PC(P-18:1(11Z)/18:3(6Z,9Z,12Z))	-0.091437059	7.395241709	-1.265732258	0.223768936	0.486144827	-6.390670403	non
DG(20:2(11Z,14Z)/18:2(9Z,12Z)/0:0)	-0.385718193	3.488360625	-0.589107894	0.564032535	0.768848713	-6.390793792	non
17beta-Estradiol 3-sulfate	0.404228968	10.33948316	1.287694941	0.216205798	0.479598663	-6.391515481	non
1-Phenyl-2-hexanone	-0.220146954	6.944215142	-1.257225108	0.226753634	0.489599632	-6.393051009	non
PC(14:0/18:1(9Z))	0.280291621	3.590392066	0.664354683	0.515944757	0.730443563	-6.394351472	non
PE(22:1(13Z)/16:0)	-0.289288044	5.399649726	-1.128403804	0.275821467	0.53319927	-6.396140235	non
DG(18:1(9Z)/20:1(11Z)/0:0)	0.179207901	5.491550455	1.140695453	0.270819952	0.532518595	-6.396732706	non
LacCer(d18:1/20:0)	-0.187011315	7.140243624	-1.258294386	0.226376781	0.489599632	-6.397616568	non
PC(18:2(9Z,12Z)/18:0)	-0.169284387	14.89993265	-1.48729003	0.156421364	0.410661458	-6.398587258	non
Eriodictyol	0.077093231	5.59928248	1.152695131	0.266003254	0.526594604	-6.398881729	non
PC(P-18:0/18:1(9Z))	0.209359345	8.079091114	1.254697819	0.227646294	0.489599632	-6.399086133	non
DG(14:1(9Z)/16:1(9Z)/0:0)	-0.1106628	6.330063053	-1.216520581	0.241466566	0.501886114	-6.402101603	non
PC(20:2(11Z,14Z)/P-16:0)	0.405686895	4.135256367	0.892458576	0.385401733	0.633977953	-6.402123595	non
PG(18:3(9Z,12Z,15Z)/22:5(7Z,10Z,13Z,16Z,19Z))	0.523909006	4.28845578	0.936222811	0.363105462	0.61075518	-6.402987459	non
3-(3-hydroxy-4-methoxyphenyl)propanoic acid	-0.140736401	7.31409619	-1.254811621	0.227606039	0.489599632	-6.40384412	non
Prilocaine	-0.461577406	10.73203588	-1.292815981	0.214471604	0.479598663	-6.404324959	non
Entecavir	1.141284682	7.901856784	1.253429505	0.228095306	0.489893654	-6.404392683	non
PC(18:3(9Z,12Z,15Z)/24:1(15Z))	0.14870838	6.23699073	1.206142181	0.245333436	0.505283064	-6.406416403	non
PC(20:3(5Z,8Z,11Z)/P-18:1(11Z))	0.231976656	5.320911773	1.10782718	0.284348165	0.539770956	-6.407622235	non
PI(18:2(9Z,12Z)/16:0)	0.181221635	6.687807875	1.234377793	0.234923483	0.49660257	-6.408323726	non
PC(18:4(6Z,9Z,12Z,15Z)/18:0)	-0.122589887	10.43465304	-1.27707267	0.219838187	0.483087596	-6.408813288	non
PG(18:2(9Z,12Z)/20:4(5Z,8Z,11Z,14Z))	-0.180256896	3.795308017	-0.746669764	0.466117286	0.696085269	-6.409151277	non
PC(20:2(11Z,14Z)/18:4(6Z,9Z,12Z,15Z))	0.144454917	5.516511595	1.132680303	0.274073563	0.533159456	-6.409366126	non
Glycyrrhetinic acid	0.269047315	6.462251988	1.219490236	0.2403688	0.500888225	-6.409555172	non
N-Acetyl-L-methionine	0.157717319	3.460420265	0.561921238	0.581973475	0.779776728	-6.409747974	non
GlcCer(d18:1/9Z-18:1)	0.188677105	5.522967923	1.131991789	0.274354413	0.533159456	-6.410988585	non
Chlormerodrin	0.091724007	5.272767127	1.096576128	0.289092405	0.544443234	-6.412790983	non
PC(20:5(5Z,8Z,11Z,14Z,17Z)/18:1(11Z))	0.098774681	4.662850818	1.014242976	0.325592087	0.577930454	-6.415829779	non
MG(20:0/0:0/0:0)	-0.174374	3.951742272	-0.807348599	0.431330312	0.673965403	-6.416461094	non
3-Methyluric acid	0.215955755	5.533471898	1.127607782	0.276147738	0.53319927	-6.417279596	non
DG(16:0/20:0/0:0)	-0.097036752	7.461887018	-1.243253864	0.231722773	0.493409698	-6.41740858	non
2-Phenylglycine	-0.036258879	3.087903507	-0.105101492	0.917604422	0.967090162	-6.417650963	non
DG(18:3(9Z,12Z,15Z)/18:2(9Z,12Z)/0:0)	0.046680804	3.125252501	0.193425238	0.84906537	0.932722855	-6.419189267	non
3-Methyladenine	0.138590106	4.949769867	1.050115785	0.309301736	0.564620736	-6.419518464	non
5-hydroxyoct-2-enoylglycine	-0.12314093	4.060629225	-0.84820911	0.408859083	0.652143493	-6.419767949	non
Taurocholic acid	-0.194628614	3.826514014	-0.744941186	0.467132762	0.697008967	-6.421241369	non
Retinoyl b-glucuronide	0.132174099	8.661899276	1.238326631	0.233495319	0.495540958	-6.422042606	non
Haloperidol	0.069844104	6.404621888	1.201724963	0.246993615	0.507419384	-6.425940205	non
PC(18:1(9Z)/P-18:0)	0.194657773	7.593413115	1.234956179	0.234713877	0.496486337	-6.426118418	non
PE(22:0/18:4(6Z,9Z,12Z,15Z))	-0.177480079	5.234540169	-1.079294857	0.296492821	0.551267197	-6.42620297	non
Crotamiton	0.172075061	7.628809651	1.233907698	0.235093951	0.496635972	-6.426936566	non
Mono-(2-ethyl-5-carboxypentyl) phthalate	0.166633469	5.738990896	1.143205832	0.269806895	0.530951933	-6.427691871	non
5-Hydroxydopamine	0.261426749	7.975699029	1.230072863	0.236488146	0.497254398	-6.428576531	non
Galacturonic acid	0.326948047	6.874177801	1.225430244	0.238184582	0.498809548	-6.428721662	non
Beclometasone dipropionate	-1.215607204	5.844244954	-1.133347511	0.273801609	0.533159456	-6.43008825	non
PIP(16:2(9Z,12Z)/16:0)	-0.073635448	7.92877198	-1.22884457	0.236936057	0.497254398	-6.430215699	non
PI(18:1(11Z)/20:4(8Z,11Z,14Z,17Z))	-0.099265194	6.33861408	-1.192967944	0.250310348	0.508881362	-6.43031867	non
PG(18:1(9Z)/22:5(7Z,10Z,13Z,16Z,19Z))	-0.62238924	6.410868619	-1.194505216	0.24972565	0.508477527	-6.430683809	non
17-beta-Estradiol-3-glucuronide	0.378564357	3.836097755	0.737798535	0.471343042	0.698281434	-6.430891192	non
PC(24:1(15Z)/16:1(9Z))	-0.080471484	5.143557116	-1.062305762	0.303902602	0.561091606	-6.431544225	non
DG(22:4(7Z,10Z,13Z,16Z)/18:1(11Z)/0:0)	-0.460874001	7.387082647	-1.228422411	0.237090154	0.497254398	-6.433385228	non
DG(22:4(7Z,10Z,13Z,16Z)/18:3(9Z,12Z,15Z)/0:0)	0.518533756	4.517114489	0.959200136	0.351760194	0.599631169	-6.434929153	non
Tetrahexosylceramide (d18:1/12:0)	-0.386013881	5.106610176	-1.053706162	0.307704327	0.563594807	-6.435881257	non
DG(20:2(11Z,14Z)/18:3(9Z,12Z,15Z)/0:0)	-0.303796005	4.466586279	-0.946328653	0.358084991	0.60548231	-6.437283344	non
DG(18:1(9Z)/18:1(9Z)/0:0)	0.114846699	5.77159415	1.137808458	0.27198852	0.532858534	-6.437662925	non
PC(16:0/18:2(9Z,12Z))	-0.166216377	6.550301181	-1.200313576	0.247525889	0.507903272	-6.438271052	non
Dolasetron	0.121379035	3.365595765	0.431188895	0.672096657	0.837515957	-6.438871478	non
DG(16:1(9Z)/20:1(11Z)/0:0)	0.066785807	4.542187081	0.968484778	0.347246311	0.596260912	-6.439029813	non
PI(20:2(11Z,14Z)/20:2(11Z,14Z))	0.136735374	3.789566297	0.706422538	0.490107449	0.711643733	-6.440328845	non
Nisoldipine	0.105155067	7.855994379	1.220168675	0.24011855	0.500888225	-6.440714913	non
PE(18:0/20:2(11Z,14Z))	-0.065219656	7.174114962	-1.222823677	0.239141153	0.499923335	-6.441332987	non
Loratadine	0.183351593	6.810857522	1.211009397	0.243514077	0.504466904	-6.443072949	non
DG(18:3(9Z,12Z,15Z)/18:1(9Z)/0:0)	-0.255596646	4.836046104	-1.00711181	0.328902143	0.579640385	-6.445884297	non
4-hydroxyhexanoylglycine	-0.140328868	9.727654175	-1.225121643	0.238297679	0.498809548	-6.446303256	non
PC(16:1(9Z)/22:0)	0.195500752	4.770572132	0.999690142	0.332372355	0.58333272	-6.446759953	non
Sialyllacto-N-tetraose a	0.020179731	3.170846386	0.125779599	0.901476712	0.957222792	-6.448532764	non
Eszopiclone	0.155677312	7.4976842	1.216465999	0.241486779	0.501886114	-6.449096102	non
PC(16:1(9Z)/16:1(9Z))	-0.151087374	3.837211961	-0.713456633	0.485862728	0.710066773	-6.449193954	non
DG(20:3(5Z,8Z,11Z)/18:1(11Z)/0:0)	0.318378899	4.260473071	0.882844132	0.390420527	0.638775431	-6.449211878	non
Dihydroergotamine	0.268631435	7.108739365	1.214543843	0.242199429	0.502767347	-6.44992266	non
Nizatidine	0.175108741	3.438075671	0.468532472	0.645737266	0.820523292	-6.450147338	non
Gentisic acid	0.316198377	10.27680716	1.236392816	0.234193871	0.495712934	-6.450875834	non
PE(16:0/18:1(11Z))	0.109807975	3.612980979	0.59178627	0.562280932	0.766985587	-6.45099639	non
9-Methyluric acid	-0.52734494	3.963063691	-0.742074976	0.468819516	0.697879237	-6.452065497	non
Protoporphyrin IX	-0.587293606	5.65255196	-1.103950845	0.285976144	0.541113375	-6.452770927	non
Monomethyl phthalate	0.108934568	5.461194281	1.084836588	0.294104671	0.548733351	-6.453158636	non
PC(18:0/22:1(13Z))	-0.179364907	5.978184002	-1.143079397	0.269857849	0.530951933	-6.453333852	non
PE(14:0/24:1(15Z))	0.060300582	3.221153256	0.214181501	0.833117112	0.92469376	-6.453404669	non
PG(18:1(11Z)/16:0)	0.621729216	4.543792364	0.941876606	0.360290794	0.60793155	-6.453462539	non
PE(20:0/20:4(5Z,8Z,11Z,14Z))	-0.09272498	5.871541082	-1.131316464	0.274630092	0.533159456	-6.455819981	non
1,7-octadienoylglycine	-0.069397104	6.603308543	-1.188107357	0.252165958	0.511433368	-6.456592847	non
Farnesol	0.11817522	5.256068793	1.052561016	0.308213167	0.563594807	-6.45688948	non
PI(22:4(7Z,10Z,13Z,16Z)/16:0)	0.109431224	8.451864726	1.207284158	0.244905631	0.504744531	-6.457825283	non
Corticosterone	-0.225039232	5.550837699	-1.090509042	0.291674859	0.546458639	-6.458620141	non
PC(P-16:0/18:3(6Z,9Z,12Z))	-0.163558363	4.725637727	-0.978443262	0.342449904	0.59277986	-6.458884246	non
PC(P-18:0/20:0)	0.121041042	3.514490337	0.50985624	0.617127815	0.803241757	-6.459455118	non
PE(18:1(9Z)/P-18:0)	0.093443243	3.297940505	0.303670532	0.765300694	0.886378704	-6.460254202	non
Biochanin A	0.303943515	4.291882068	0.880310921	0.391750095	0.639767281	-6.460963924	non
Carbimazole	-0.706606864	5.087473497	-1.023715109	0.321232249	0.573445568	-6.462094182	non
9,12,13-TriHOME	-0.385929295	8.552811245	-1.203295744	0.246402263	0.506528595	-6.462399606	non
Cystathionine ketimine	0.139566465	5.142998248	1.031606347	0.317632104	0.572022819	-6.462999052	non
Prostaglandin D1	0.094432682	4.750843054	0.977396186	0.342952024	0.593329175	-6.465861634	non
MG(0:0/18:2(9Z,12Z)/0:0)	-0.168288593	7.833727827	-1.197732043	0.248501733	0.507903272	-6.467488526	non
Nevirapine	0.21951928	4.223203298	0.85071265	0.407507487	0.651749727	-6.468716829	non
DG(18:1(11Z)/20:3(8Z,11Z,14Z)/0:0)	-0.094417428	5.146639228	-1.026256054	0.320069841	0.573186207	-6.469106834	non
Tenofovir	0.224427544	8.035548007	1.195278644	0.249431873	0.508477527	-6.469321955	non
Heptadecanoyl carnitine	0.125858036	5.388706678	1.057441805	0.306048648	0.562885613	-6.471144896	non
PC(20:4(8Z,11Z,14Z,17Z)/20:0)	0.283567829	6.63981584	1.176793349	0.256525941	0.516753323	-6.472035643	non
Lidocaine	0.166518381	6.06304111	1.134181886	0.273461802	0.533159456	-6.472521341	non
PI(16:0/22:4(10Z,13Z,16Z,19Z))	0.318870123	7.630571157	1.194519651	0.249720164	0.508477527	-6.47313438	non
3-Sialyl-N-acetyllactosamine	-0.120787952	6.055943826	-1.13226336	0.274243611	0.533159456	-6.473481831	non
PE(18:1(11Z)/P-18:0)	0.10534368	3.500161877	0.468940719	0.645451695	0.820523292	-6.474460987	non
Monoisobutyl phthalic acid	0.529619328	5.217606241	1.029505562	0.318587684	0.572139291	-6.475983285	non
Dydrogesterone	-0.070856931	6.8845207	-1.185278268	0.253250839	0.512729157	-6.476367425	non
DG(20:4(5Z,8Z,11Z,14Z)/14:0/0:0)	-0.362065627	3.763388412	-0.62559959	0.540418304	0.747719575	-6.476826099	non
p-Cresol sulfate	0.212404617	4.76274499	0.965649468	0.348620442	0.597342711	-6.478788949	non
Vindesine	0.231148539	5.661625689	1.086716348	0.293297827	0.548342738	-6.479187205	non
Diadenosine hexaphosphate	-0.434831212	3.359070734	-0.277931108	0.784632368	0.895839876	-6.479233703	non
N-Acetylasparagine	-0.28303189	5.120986835	-1.012998977	0.326167796	0.578241238	-6.47934713	non
PC(16:0/20:3(5Z,8Z,11Z))	-0.229516817	5.636078854	-1.080761048	0.295859602	0.55104709	-6.480509113	non
PC(P-18:0/P-18:1(11Z))	0.441829693	6.114043355	1.130225291	0.275075966	0.533159456	-6.480802681	non
Dibucaine	1.215589965	7.509562887	1.183170023	0.254061609	0.514046519	-6.482756372	non
cis-Vaccenic acid	0.209413128	5.8305564	1.101140293	0.287160826	0.542396125	-6.484519099	non
Torasemide	-0.21589993	11.29765244	-1.25185125	0.22865501	0.489912214	-6.484539798	non
Vincristine	0.078555758	5.719534231	1.088900968	0.292362175	0.547071647	-6.484575376	non
Octaethylene glycol	-0.077789149	4.028244382	-0.752623806	0.462629806	0.693730307	-6.487262723	non
PI(22:5(4Z,7Z,10Z,13Z,16Z)/16:0)	0.441514196	5.470453189	1.052588943	0.308200751	0.563594807	-6.48729093	non
PC(22:0/20:2(11Z,14Z))	0.247523657	7.450135479	1.182343928	0.25437984	0.514213417	-6.489056501	non
DG(18:2(9Z,12Z)/22:4(7Z,10Z,13Z,16Z)/0:0)	0.10682962	10.42666143	1.207379915	0.244869784	0.504744531	-6.49176546	non
GlcCer(d18:1/25:0)	0.141507975	6.911238661	1.173167174	0.257935406	0.518291982	-6.49179152	non
DG(18:3(6Z,9Z,12Z)/20:3(8Z,11Z,14Z)/0:0)	-0.139511013	7.93681897	-1.175798216	0.256912156	0.517206855	-6.492083865	non
Perflutren	0.27616411	11.80936671	1.268205269	0.22290709	0.48521513	-6.493057487	non
PE(20:3(5Z,8Z,11Z)/P-18:0)	0.282755759	10.24297598	1.198920485	0.248052125	0.507903272	-6.493513856	non
PC(22:2(13Z,16Z)/P-18:1(9Z))	-0.151632904	5.818925239	-1.090754227	0.291570167	0.546458639	-6.493556345	non
PC(14:0/18:3(9Z,12Z,15Z))	-0.195344132	6.117638919	-1.11904113	0.279677276	0.537592764	-6.4936351	non
PI(20:2(11Z,14Z)/18:2(9Z,12Z))	0.101451925	5.337690337	1.025672297	0.320336626	0.573186207	-6.496226581	non
DG(18:3(9Z,12Z,15Z)/14:0/0:0)	-0.113731461	5.569906665	-1.056480859	0.306473931	0.562979286	-6.49814912	non
6-hydroxyoct-6-enoylglycine	-0.214620599	3.371740988	-0.25813831	0.7995983	0.903416657	-6.499257871	non
PE(22:2(13Z,16Z)/P-16:0)	0.156427865	4.590701581	0.913790436	0.374421403	0.624048017	-6.499431914	non
PC(18:2(9Z,12Z)/18:2(9Z,12Z))	-0.203264206	3.783159014	-0.607411478	0.552120112	0.758279589	-6.500487015	non
PC(O-16:0/18:2(9Z,12Z))	-0.065587286	3.29996908	-0.115881657	0.90919142	0.962079279	-6.501000929	non
PC(16:1(9Z)/18:2(9Z,12Z))	-0.348574466	5.357849697	-1.023664013	0.321255655	0.573445568	-6.501013309	non
Pamidronate	-0.695139295	4.076413597	-0.713135073	0.486056296	0.710066773	-6.502044892	non
2,4-octadienoylglycine	-0.335537442	8.118497582	-1.167341941	0.260211936	0.520595986	-6.502327557	non
11-Dehydro-thromboxane B2	0.081708553	5.113612624	0.988176202	0.33780718	0.588231484	-6.502569585	non
MG(0:0/22:1(13Z)/0:0)	-0.365270489	4.577788337	-0.897454849	0.382810783	0.630685185	-6.502795097	non
3'-Hydroxydiclofenac	-0.84219038	7.244796078	-1.161256971	0.262606213	0.523419336	-6.504199709	non
(R)-Lipoic acid	0.843174515	6.868187351	1.153855496	0.265540928	0.526328346	-6.504692484	non
Sulpiride	0.077585785	9.016146555	1.167542919	0.26013314	0.520595986	-6.504698536	non
PC(22:6(4Z,7Z,10Z,13Z,16Z,19Z)/14:0)	-0.778847229	8.364540812	-1.165489317	0.260939137	0.521066895	-6.505234121	non
PI(20:3(8Z,11Z,14Z)/20:3(8Z,11Z,14Z))	0.119117058	11.63232481	1.249731942	0.229408275	0.49031576	-6.505680699	non
PC(14:1(9Z)/20:2(11Z,14Z))	0.246831459	7.206080829	1.16737236	0.260200009	0.520595986	-6.506092442	non
DG(20:4(8Z,11Z,14Z,17Z)/16:1(9Z)/0:0)	0.226293727	4.19597118	0.794559164	0.438522478	0.678600327	-6.50715805	non
LacCer(d18:1/16:0)	0.132096179	7.466961402	1.16609226	0.260702298	0.521066895	-6.50760189	non
DG(18:1(9Z)/20:3(5Z,8Z,11Z)/0:0)	0.090546177	5.303296842	1.009290129	0.32788851	0.579168164	-6.50772004	non
DG(20:2(11Z,14Z)/18:3(6Z,9Z,12Z)/0:0)	-0.548131514	5.582809279	-1.042848406	0.312553457	0.568174895	-6.509008909	non
PG(18:0/20:4(5Z,8Z,11Z,14Z))	0.340572857	5.544913686	1.041118634	0.313331052	0.568742796	-6.510319351	non
3,7-octadienoylglycine	0.191968463	5.985378866	1.09216993	0.290966218	0.546458639	-6.510759362	non
Guanosine triphosphate	0.127233461	5.520540112	1.038020835	0.31472711	0.569988015	-6.510838355	non
DG(20:5(5Z,8Z,11Z,14Z,17Z)/16:0/0:0)	-0.051767627	3.356311887	-0.185938872	0.854834643	0.935499143	-6.512239813	non
DG(16:1(9Z)/20:3(8Z,11Z,14Z)/0:0)	-0.512238921	5.825923409	-1.066199452	0.302192563	0.558957135	-6.515548827	non
8,9-DiHETrE	-0.073347983	7.982310134	-1.15409183	0.26544684	0.526328346	-6.516439986	non
LysoPA(0:0/18:0)	-0.226182933	6.561062353	-1.131177944	0.274686664	0.533159456	-6.517104777	non
4-Allylphenol sulfate	-0.123300929	7.294152469	-1.156962173	0.264306116	0.525828339	-6.51808035	non
Nonyl cyclopropane	-0.12129465	4.663556526	-0.902496487	0.380208194	0.62833171	-6.52058092	non
PC(20:3(5Z,8Z,11Z)/18:1(11Z))	0.18595994	5.448838499	1.017410829	0.324129313	0.576483847	-6.521079387	non
Tranexamic Acid	-0.297137443	5.757734007	-1.055756201	0.306794924	0.563246713	-6.521728475	non
m-Coumaric acid	0.029897841	3.345780997	0.101147526	0.92069275	0.968975555	-6.521830394	non
Arabinosylhypoxanthine	0.151136785	8.489481429	1.151075857	0.266649439	0.527052474	-6.522439892	non
PC(14:1(9Z)/22:5(4Z,7Z,10Z,13Z,16Z))	0.427872336	11.34133785	1.222034647	0.2394313	0.500204232	-6.522529524	non
Cer(d18:0/16:0)	0.197785024	5.847509489	1.06687755	0.301895473	0.558957135	-6.523002969	non
Indole-3-propionic acid	0.060770389	3.43219872	0.270813035	0.790004856	0.897839537	-6.523507939	non
Epinephrine	-0.088950741	7.250381659	-1.151916877	0.266313675	0.526884295	-6.52364941	non
Ganglioside GD2 (d18:1/24:0)	0.098761694	5.009643327	0.952155624	0.35521207	0.602886164	-6.524174857	non
Erythromycin	-0.247108584	3.905273658	-0.633897136	0.535125328	0.744814663	-6.525279431	non
Oleoylethanolamide	-0.338395863	12.51924487	-1.273164056	0.221186795	0.483808445	-6.526205939	non
Droperidol	0.13621951	5.383610066	1.001948563	0.331313632	0.581973781	-6.526858221	non
PC(P-18:1(11Z)/22:5(4Z,7Z,10Z,13Z,16Z))	0.143828339	6.856466844	1.138824856	0.271576682	0.532858534	-6.527910882	non
PE(22:5(7Z,10Z,13Z,16Z,19Z)/18:0)	0.171111299	7.485201301	1.147649675	0.268020585	0.528957651	-6.52822097	non
PE(20:2(11Z,14Z)/20:3(8Z,11Z,14Z))	0.080207789	5.59169735	1.029536652	0.318573527	0.572139291	-6.529670437	non
2-Hydroxymyristic acid	-0.12047008	11.24789017	-1.211501642	0.243330656	0.504412354	-6.529802334	non
DG(22:5(7Z,10Z,13Z,16Z,19Z)/14:0/0:0)	0.479446196	5.470224559	1.008965323	0.328039511	0.579168164	-6.53146195	non
6,7-octadienoylglycine	0.07474944	8.028281691	1.138020563	0.271902538	0.532858534	-6.53422189	non
Aspirin	0.063917836	9.886460347	1.150881794	0.26672696	0.527052474	-6.535485516	non
PC(22:0/14:0)	-0.111754445	6.311340087	-1.096091571	0.289298035	0.544511131	-6.536106593	non
1,6-octadienoylglycine	0.088253182	5.562608824	1.018128697	0.323798486	0.576373565	-6.537089181	non
PC(20:0/18:3(9Z,12Z,15Z))	0.252220431	7.597406492	1.13826764	0.271802404	0.532858534	-6.537389063	non
PC(18:3(6Z,9Z,12Z)/18:2(9Z,12Z))	0.275633302	4.321422111	0.79754966	0.436834027	0.678600327	-6.538595286	non
DG(18:4(6Z,9Z,12Z,15Z)/18:1(9Z)/0:0)	-0.084181371	3.549793	-0.358421742	0.724723127	0.865154397	-6.538879061	non
PI(18:2(9Z,12Z)/18:1(11Z))	0.114910054	5.693116555	1.033819785	0.316627512	0.571817177	-6.538915601	non
5-hydroxyhexanoylglycine	0.217721367	6.580839934	1.112770921	0.282281885	0.537896757	-6.539682473	non
Quinic acid	0.252423337	5.209428043	0.962317354	0.350240184	0.598839846	-6.54055732	non
Dimethylguanidino valeric acid	-0.380354817	5.905327525	-1.052948876	0.308040755	0.563594807	-6.540695243	non
Cer(d18:1/16:0)	-0.163697404	7.478109038	-1.134935227	0.273155269	0.533159456	-6.542080753	non
PI(18:1(11Z)/18:1(9Z))	0.195847759	5.119371656	0.947682771	0.357415933	0.605134293	-6.542409259	non
Difucosyllacto-N-hexaose	-0.280061259	6.556949477	-1.106585542	0.284868877	0.539770956	-6.543394669	non
N-Acetyl-D-glucosamine	0.851269613	4.423443752	0.79073097	0.440689891	0.680315019	-6.543674431	non
Carbinoxamine	-0.273257933	8.153972833	-1.129992122	0.275171314	0.533159456	-6.544074459	non
13,14-Dihydro-15-keto PGF2a	-0.428095078	8.495686533	-1.131057588	0.274735825	0.533159456	-6.544157274	non
PE(P-16:0/18:1(9Z))	-0.120004099	7.883239082	-1.128873724	0.275628993	0.533159456	-6.545046237	non
27-Hydroxycholesterol	-0.153691025	5.597968409	-1.0117502	0.326746444	0.578380834	-6.547427025	non
PE(22:2(13Z,16Z)/15:0)	-0.0059203	3.402987365	-0.022131233	0.982617519	0.992820911	-6.549228319	non
Diltiazem	0.967889441	5.388975869	0.974346695	0.344417329	0.594582819	-6.55125193	non
DG(14:0/22:5(4Z,7Z,10Z,13Z,16Z)/0:0)	0.027802779	3.489759374	0.245002892	0.809575529	0.910843386	-6.552795274	non
DG(20:0/18:1(9Z)/0:0)	0.034517275	3.469131382	0.210922349	0.835616526	0.925867724	-6.552849254	non
Phenylpropanolamine	-0.140562898	7.277871124	-1.12520564	0.277134068	0.534140152	-6.553303624	non
Diflorasone	0.148433812	3.627622378	0.402192937	0.692875419	0.847303601	-6.55331658	non
PE(P-18:1(11Z)/20:1(11Z))	-0.181194083	6.718541492	-1.106970426	0.28470739	0.539770956	-6.554418878	non
DG(18:1(9Z)/14:0/0:0)	0.079725577	7.728066829	1.118026856	0.280097382	0.537592764	-6.558094219	non
p-Chlorobenzene sulfonyl urea	0.096763665	13.43929482	1.290597213	0.215221616	0.479598663	-6.558317823	non
PI(18:2(9Z,12Z)/20:3(8Z,11Z,14Z))	-0.118681787	3.884521249	-0.574714608	0.57349452	0.773693956	-6.558409476	non
PG(16:0/20:3(8Z,11Z,14Z))	-0.16696266	5.383589772	-0.96946636	0.346771469	0.596083077	-6.55858269	non
MG(18:3(9Z,12Z,15Z)/0:0/0:0)	0.127777053	5.386784686	0.969790086	0.346614966	0.596083077	-6.558840322	non
DG(18:3(9Z,12Z,15Z)/16:0/0:0)	-0.125293397	7.025329402	-1.11511989	0.281304032	0.537896757	-6.560170963	non
PC(20:0/22:2(13Z,16Z))	0.070390751	3.779957808	0.505789878	0.619915981	0.805238761	-6.561100845	non
PC(22:1(13Z)/18:3(9Z,12Z,15Z))	0.090729338	5.9112947	1.036903884	0.315231574	0.570579812	-6.561213619	non
DG(20:0/20:5(5Z,8Z,11Z,14Z,17Z)/0:0)	0.144701906	5.206057516	0.939114202	0.361664141	0.609055049	-6.561944431	non
CE(22:6(4Z,7Z,10Z,13Z,16Z,19Z))	-0.102518856	7.684943358	-1.11450823	0.281558418	0.537896757	-6.56254351	non
LacCer(d18:1/22:0)	0.131211518	5.018719995	0.91171898	0.375478284	0.624048017	-6.562959487	non
PC(20:0/22:0)	0.178200096	3.664122664	0.410065081	0.687208183	0.844479707	-6.563192302	non
PC(18:4(6Z,9Z,12Z,15Z)/22:0)	0.117396532	8.439786059	1.113751167	0.281873512	0.537896757	-6.563471523	non
CE(20:1(11Z))	0.059649942	7.449305516	1.116069442	0.280909459	0.537896757	-6.563476834	non
PC(20:4(8Z,11Z,14Z,17Z)/16:0)	-0.117278529	7.168843594	-1.115082238	0.281319687	0.537896757	-6.563518685	non
PC(P-18:1(11Z)/P-16:0)	0.339844071	8.444547071	1.113051158	0.282165093	0.537896757	-6.564137316	non
PC(16:1(9Z)/20:5(5Z,8Z,11Z,14Z,17Z))	0.114392816	3.532681091	0.265581032	0.793960807	0.899896982	-6.564181828	non
Prostaglandin D2	0.700524335	7.37545217	1.112187267	0.282525246	0.537896757	-6.565427953	non
MG(15:0/0:0/0:0)	-0.16341642	7.154378797	-1.11217228	0.282531497	0.537896757	-6.566156378	non
PC(22:6(4Z,7Z,10Z,13Z,16Z,19Z)/20:0)	0.340397149	8.661636372	1.112005649	0.282601006	0.537896757	-6.566178004	non
Eugenol	0.112104286	4.263981781	0.744346019	0.467482712	0.697207147	-6.566508197	non
NADP	-0.34520145	6.453834793	-1.077139407	0.297425521	0.552361682	-6.566875732	non
DG(18:0/16:0/0:0)	-0.364736134	4.218182704	-0.711226778	0.487205968	0.710130895	-6.566927082	non
Butalbital	0.741881215	5.677019884	0.996471131	0.333885529	0.584254188	-6.567721339	non
DG(18:2(9Z,12Z)/18:1(9Z)/0:0)	0.132852126	4.164580052	0.703734926	0.491735045	0.712593713	-6.567782684	non
PC(22:5(7Z,10Z,13Z,16Z,19Z)/P-18:0)	1.233745314	5.587479037	0.97565239	0.343789396	0.593818048	-6.569027043	non
Adenosine	0.064336842	7.824125081	1.106995757	0.284696765	0.539770956	-6.569171457	non
Tiglylcarnitine	0.078429468	5.214474417	0.932126533	0.365154141	0.612596629	-6.569651076	non
MG(22:6(4Z,7Z,10Z,13Z,16Z,19Z)/0:0/0:0)	-0.097120694	4.065738017	-0.65338616	0.522806875	0.73553181	-6.570222025	non
2-Hydroxycinnamic acid	-0.10603175	5.346055441	-0.950355894	0.3560977	0.603401907	-6.571472914	non
Retinal	-0.682630889	5.888873334	-1.015952512	0.324802115	0.577166349	-6.571511354	non
PC(20:1(11Z)/18:3(9Z,12Z,15Z))	-0.328631787	5.758175491	-1.006420898	0.329224108	0.57988953	-6.571720921	non
Buclizine	0.249385058	6.246734988	1.057232311	0.306141327	0.562885613	-6.571787507	non
12,13-EpOME	-0.260022664	4.932675802	-0.88691655	0.388289407	0.637096212	-6.57310978	non
DG(20:3(5Z,8Z,11Z)/20:3(8Z,11Z,14Z)/0:0)	0.138838443	4.313506532	0.752023875	0.462980481	0.693730307	-6.574019282	non
PC(20:5(5Z,8Z,11Z,14Z,17Z)/16:0)	-0.092373454	5.350824359	-0.947422284	0.357544571	0.605134293	-6.574941274	non
4-hydroxyoct-6-enoylglycine	0.115684665	5.481202807	0.965855733	0.348520349	0.597342711	-6.576794518	non
TG(18:0/18:0/18:1(9Z))	-0.13689437	3.89722698	-0.548757636	0.590764344	0.784197539	-6.576797884	non
PC(P-18:0/18:3(6Z,9Z,12Z))	-0.234277341	3.644596083	-0.339904085	0.738359519	0.87273611	-6.576938771	non
PC(20:0/P-16:0)	-0.105759649	7.498645727	-1.101809359	0.286878477	0.542181748	-6.578344563	non
PG(18:1(11Z)/22:6(4Z,7Z,10Z,13Z,16Z,19Z))	0.335519706	5.234289237	0.924280959	0.369100013	0.616638992	-6.579975014	non
4-hydroxy-5-[4-hydroxy-3-(sulfooxy)phenyl]pentanoic acid	-0.170050124	7.133386644	-1.097242494	0.288809799	0.544230202	-6.581907262	non
Mazindol	-0.078818954	3.844189642	-0.501848724	0.622624027	0.806101731	-6.584847442	non
PC(P-18:0/22:2(13Z,16Z))	0.079914137	3.732744884	0.419949922	0.680119219	0.840720363	-6.585072668	non
PC(14:1(9Z)/22:0)	0.083952354	4.121132606	0.658964631	0.519310466	0.733937459	-6.585746724	non
Pseudoephedrine	0.084082514	4.893525927	0.867113282	0.398725575	0.646620111	-6.587010802	non
PC(14:0/P-16:0)	-0.182548824	5.981439641	-1.017174014	0.324238501	0.576483847	-6.587366493	non
GlcCer(d18:1/24:0)	-0.189557044	9.57196872	-1.097809608	0.288569446	0.544096589	-6.587450875	non
Aciclovir	0.064763077	7.251334616	1.093254663	0.290504088	0.546458639	-6.58858765	non
PC(14:1(9Z)/18:1(11Z))	0.191961892	5.52320381	0.958148767	0.352273892	0.600080355	-6.590227756	non
PG(18:1(11Z)/20:4(5Z,8Z,11Z,14Z))	0.269863709	9.388758845	1.092596472	0.290784433	0.546458639	-6.590340787	non
PG(18:0/18:1(9Z))	-0.152738501	6.332316151	-1.04627312	0.311018037	0.567165167	-6.590343695	non
PA(16:0/18:1(11Z))	-0.165689442	4.884934916	-0.859749062	0.402653289	0.648623846	-6.591116749	non
PI(20:3(8Z,11Z,14Z)/16:0)	0.147966056	10.28731043	1.11362548	0.281925849	0.537896757	-6.591477234	non
5-Methyltetrahydrofolic acid	0.031642639	3.527522791	0.114594987	0.91019499	0.96236907	-6.592140811	non
PC(20:2(11Z,14Z)/14:1(9Z))	0.134364906	4.265128581	0.710007104	0.487941615	0.710558062	-6.592226462	non
PC(20:4(8Z,11Z,14Z,17Z)/18:1(11Z))	0.200778933	5.342492299	0.926553611	0.36795402	0.61568544	-6.593200797	non
6-(2-carboxy-4-hydroxyphenoxy)-3,4,5-trihydroxyoxane-2-carboxylic acid	0.167754302	3.562924213	0.178113405	0.860874343	0.936962336	-6.596231485	non
DG(24:1(15Z)/24:0/0:0)	0.663936937	4.944957147	0.859703461	0.40267769	0.648623846	-6.596629635	non
PC(P-16:0/P-16:0)	0.052040014	3.539092006	0.113841715	0.910782597	0.962647439	-6.596721702	non
PC(22:4(7Z,10Z,13Z,16Z)/20:0)	-0.178687129	6.557119302	-1.056992057	0.306247638	0.562885613	-6.596836625	non
PC(20:1(11Z)/18:0)	0.096414768	7.9762264	1.079783843	0.296281527	0.551193502	-6.5976171	non
[truncated: 1,212 more rows]
