# Supplementary material for: Flos Carthami Exerts Hepatoprotective Action in a Rat Model of Alcoholic Liver Injury via Modulating the Metabolomics Profile
Source: Evid Based Complement Alternat Med. 2022 May 2;2022:8158699. doi: 10.1155/2022/8158699 (PMC9085312; doi:10.1155/2022/8158699)
Supplement: Supplementary Materials — Additional Figure S1. Enrichment analysis of metabolites differentially expressed between the CG and MG. Additional Figure S2. Enrichment analysis of metabolites differentially expressed between the FC and MG. Additional Figure S3. Metabolite interaction network of FC-responsive metabolites in alcoholic liver injury. Additional File S1. List of ingredients in FC as reported in TCMSP. Additional File S2. List of metabolites differentially expressed between the CG and MG. Additional File S3. List of metabolites differentially expressed between the FC and MG. Additional File S4. List of FC-responsive metabolites in alcoholic liver injury. Additional File S5. Pearson correlation of FC-responsive metabolites in alcoholic liver injury. [file 8158699.f1.zip › 8158699.f1/Additional File S4 (1).txt]

NAME	SPOT	CG	MG	FC
1-METHYLADENINE	ID_0	0	103,406.91	18,181.34
3-METHYLADENINE	ID_1	0	131,318.52	1,796.27
PHENYLGLYOXYLIC ACID	ID_4	0	112,519.43	4,769.16
D-XYLULOSE	ID_6	0	41,701.29	15,901.25
3-INDOLEACETONITRILE	ID_40	0	11,337.91	5,848.13
4-HYDROXYNONENAL	ID_41	0	44,761.87	26,591.43
N-ACETYLVALINE	ID_46	0	98,049.84	55,764.35
PREGABALIN	ID_47	0	148,602.11	87,969.57
OXOADIPIC ACID	ID_48	0	9,125.68	3,412.41
3-HYDROXYOCTANOIC ACID	ID_50	0	22,977.75	-17,882.95
(R)-2-HYDROXYCAPRYLIC ACID	ID_51	0	27,782.77	348.01
TRIMETHYLSILYL L-ALANINE	ID_56	0	94,619.22	12,155.09
ACETYLCYSTEINE	ID_65	0	758,644.40	532,697.38
S-(2-CARBOXYPROPYL)-CYSTEAMINE	ID_67	0	35,654.88	17,616.02
4-HYDROXYCINNAMIC ACID	ID_70	0	15,186.04	4,674.90
L-FUCOSE	ID_72	0	200,582.08	129,155.57
1,5-ANHYDROSORBITOL	ID_73	0	38,636.71	19,189.79
4-METHOXYPHENYLACETIC ACID	ID_85	0	51,651.51	37,269.49
THIOGUANINE	ID_89	0	27,173.36	-10,371.73
8-HYDROXYGUANINE	ID_90	0	35,894.96	-234.1
PHENYLEPHRINE	ID_93	0	53,458.78	18,972.57
P-SYNEPHRINE	ID_94	0	68,055.89	48,860.82
NONYL CYCLOPROPANE	ID_100	0	46,826.31	-13,512.89
PROPYLTHIOURACIL	ID_111	0	60,949.34	28,656.92
GLYCEROL 3-PHOSPHATE	ID_113	0	40,445.98	-34,410.76
GUANIDINOSUCCINIC ACID	ID_127	0	44,599.66	9,801.60
DEBRISOQUINE	ID_132	0	73,221.87	2,718.42
ASCORBIC ACID	ID_133	0	46,143.64	13,558.06
SULFORAPHANE	ID_135	0	60,409.91	41,044.90
CYSTEINYLGLYCINE	ID_139	0	78,060.02	-190.43
5-PHENYLVALERIC ACID	ID_143	0	115,513.73	-20,139.08
GLUCOSAMINE	ID_146	0	35,805.91	23,997.71
(R)-SALSOLINOL	ID_148	0	205,341.14	360.7
MEXILETINE	ID_149	0	137,982.53	90,157.45
MONOMETHYL PHTHALATE	ID_153	0	188,118.86	102,959.58
D-GLUCOSE	ID_155	0	58,564.70	7,869.90
MYO-INOSITOL	ID_158	0	83,424.07	38,907.39
ALLO-INOSITOL	ID_162	0	57,446.80	2,984.68
THEOPHYLLINE	ID_164	0	32,612.04	11,609.53
O-TYROSINE	ID_170	0	23,565.10	15,435.34
3-(2,4-DIHYDROXYPHENYL)PROPANOIC ACID	ID_180	0	32,332.88	19,785.32
VANYLGLYCOL	ID_190	0	52,052.42	18,076.03
CARBIMAZOLE	ID_197	0	228,466.17	141,636.67
1,1-DIMETHYLETHYL HEPTANOIC ACID	ID_198	0	150,899.47	85,215.06
N1-ACETYLSPERMIDINE	ID_200	0	27,587.95	9,165.24
N-ACETYLGLUTAMINE	ID_204	0	43,469.17	12,223.27
2-HYDROXYDECANOATE	ID_209	0	35,180.95	24,042.98
1-HYDROXYHEXANOYLGLYCINE	ID_214	0	33,355.06	5,071.70
DIAMINOPIMELIC ACID	ID_219	0	54,360.20	36,726.84
1,4-BIS-(1,1-DIMETHYLETHYL)-BENZENE	ID_220	0	59,641.87	1,256.20
5-METHOXYTRYPTOPHOL	ID_223	0	32,187.80	10,076.72
4-HYDROXYDEBRISOQUINE	ID_224	0	53,544.92	13,521.50
CITRIC ACID	ID_225	0	20,733.23	-7,506.67
D-THREO-ISOCITRIC ACID	ID_227	0	52,193.95	27,616.43
5-KETO-D-GLUCONATE	ID_235	0	55,766.24	32,008.93
MONOETHYL PHTHALATE	ID_237	0	40,565.75	24,584.38
4-AMINOHIPPURIC ACID	ID_238	0	52,403.87	26,404.49
TETRAETHYLENE GLYCOL	ID_241	0	102,950.55	36,585.33
1,3-DIMETHYLURIC ACID	ID_245	0	39,388.98	13,109.81
7,9-DIMETHYLURIC ACID	ID_248	0	34,493.02	17,020.14
GOLD	ID_251	0	24,558.57	14,107.26
1,4-OCTADIENOYLGLYCINE	ID_255	0	47,352.31	13,123.90
1,7-OCTADIENOYLGLYCINE	ID_258	0	124,401.21	17,271.81
2,3-OCTADIENOYLGLYCINE	ID_259	0	20,998.98	953.91
2,4-OCTADIENOYLGLYCINE	ID_260	0	73,348.83	-4,360.74
2,7-OCTADIENOYLGLYCINE	ID_263	0	75,358.51	-27,063.18
5,7-OCTADIENOYLGLYCINE	ID_272	0	35,520.41	9,791.66
6,7-OCTADIENOYLGLYCINE	ID_273	0	39,420.60	7,126.92
1-[2-METHYL-3-(METHYLTHIO) ALLYL]CYCLOHEX-2-ENOL	ID_278	0	84,193.26	54,650.84
CLAVULANATE	ID_281	0	28,138.37	10,531.00
4-OCTENOYLGLYCINE	ID_285	0	75,569.90	53,472.55
ASYMMETRIC DIMETHYLARGININE	ID_292	0	203,216.77	123,776.91
CYSTATHIONINE KETIMINE	ID_293	0	43,170.69	15,604.70
GAMMA-GLUTAMYLGLYCINE	ID_296	0	47,386.62	4,075.33
ETHAMBUTOL	ID_299	0	25,575.59	6,643.83
CINNAMOYLGLYCINE	ID_301	0	37,766.23	7,184.71
N-PROPIONYLMETHIONINE	ID_302	0	50,032.83	15,677.41
(S)-LIPOIC ACID	ID_304	0	92,405.99	20,607.33
(R)-LIPOIC ACID	ID_305	0	32,467.27	3,180.41
BISMUTH	ID_310	0	41,990.14	23,767.43
SEDOHEPTULOSE	ID_313	0	79,181.11	57,296.35
ALTRETAMINE	ID_315	0	137,789.71	75,091.47
PHOSPHOCREATINE	ID_316	0	50,602.04	-3,058.81
METHYLDOPA	ID_319	0	53,625.47	14,227.39
PRAMIPEXOLE	ID_320	0	52,351.29	28,495.30
CARMUSTINE	ID_323	0	121,655.15	37,509.77
BACLOFEN	ID_324	0	87,714.18	56,384.37
2-NONENOYLGLYCINE	ID_325	0	66,208.12	35,051.69
4-NONENOYLGLYCINE	ID_327	0	29,215.16	10,605.16
5-NONENOYLGLYCINE	ID_328	0	78,088.33	39,505.28
6-NONENOYLGLYCINE	ID_329	0	56,888.33	28,680.44
8-NONENOYLGLYCINE	ID_331	0	28,778.42	4,710.66
GUANADREL	ID_332	0	25,279.46	18,160.08
4-ALLYLPHENOL SULFATE	ID_333	0	93,086.37	17,444.01
METHYL BISNORBIOTINYL KETONE	ID_334	0	17,500.94	3,045.96
GLYCERYLPHOSPHORYLETHANOLAMINE	ID_337	0	69,280.70	41,766.02
1-HYDROXYOCT-2-ENOYLGLYCINE	ID_338	0	70,000.47	-6,023.51
1-HYDROXYOCT-3-ENOYLGLYCINE	ID_339	0	92,512.46	23,816.55
1-HYDROXYOCT-6-ENOYLGLYCINE	ID_342	0	45,381.56	31,803.80
2-HYDROXYOCT-1-ENOYLGLYCINE	ID_344	0	24,737.25	1,227.86
2-HYDROXYOCT-2-ENOYLGLYCINE	ID_345	0	59,714.21	34,876.51
2-HYDROXYOCT-5-ENOYLGLYCINE	ID_348	0	18,313.76	3,696.14
2-HYDROXYOCT-6-ENOYLGLYCINE	ID_349	0	94,101.15	44,576.47
3-HYDROXYOCT-1-ENOYLGLYCINE	ID_351	0	9,671.08	-5,111.31
5-HYDROXYOCT-1-ENOYLGLYCINE	ID_365	0	40,745.61	26,551.35
5-HYDROXYOCT-2-ENOYLGLYCINE	ID_366	0	14,058.42	-10,782.08
5-HYDROXYOCT-3-ENOYLGLYCINE	ID_367	0	50,175.91	12,781.85
5-HYDROXYOCT-5-ENOYLGLYCINE	ID_369	0	100,622.16	37,350.11
5-HYDROXYOCT-6-ENOYLGLYCINE	ID_370	0	66,477.43	42,656.78
6-HYDROXYOCT-1-ENOYLGLYCINE	ID_372	0	142,260.17	54,202.77
6-HYDROXYOCT-4-ENOYLGLYCINE	ID_375	0	56,131.17	30,431.41
6-HYDROXYOCT-5-ENOYLGLYCINE	ID_376	0	27,241.31	1,746.77
6-HYDROXYOCT-6-ENOYLGLYCINE	ID_377	0	33,131.01	10,928.51
7-HYDROXYOCT-1-ENOYLGLYCINE	ID_379	0	26,891.70	7,423.77
7-HYDROXYOCT-3-ENOYLGLYCINE	ID_381	0	23,245.72	16,980.78
7-HYDROXYOCT-5-ENOYLGLYCINE	ID_383	0	41,702.49	19,315.61
7-HYDROXYOCT-7-ENOYLGLYCINE	ID_385	0	29,389.60	3,082.95
NITROPRUSSIDE	ID_386	0	39,836.68	21,745.35
GAMMA-GLUTAMYLALANINE	ID_392	0	105,000.16	55,151.73
PRIMIDONE	ID_394	0	25,713.18	11,012.70
5-METHOXYDIMETHYLTRYPTAMINE	ID_396	0	18,890.86	7,428.47
MIGLUSTAT	ID_400	0	67,668.68	39,919.70
N-ACETYLGALACTOSAMINE	ID_404	0	70,574.47	19,927.22
MONOISOBUTYL PHTHALIC ACID	ID_409	0	45,846.26	17,001.30
2-HYDROXYPHENYLPROPIONYLGLYCINE	ID_412	0	120,698.09	30,349.79
3-HYDROXYPHENYLPROPIONYLGLYCINE	ID_413	0	44,131.59	7,261.44
5-HYDROXYPHENYLPROPIONYLGLYCINE	ID_415	0	387,641.67	249,643.57
L-3-HYDROXYKYNURENINE	ID_417	0	82,855.50	47,244.85
PORPHOBILINOGEN	ID_422	0	65,211.17	46,346.79
PENTOBARBITAL	ID_425	0	6,887.78	-2,301.95
HEPTYL CYCLOHEXANE CARBOXYLIC ACID	ID_427	0	38,188.31	-294.41
NABUMETONE	ID_432	0	22,876.21	10,205.17
ISOLEUCYLPROLINE	ID_433	0	414,039.27	250,116.62
ERGOTHIONEINE	ID_436	0	97,293.34	54,505.45
TRIMETHYLSILYL NONANOIC ACID	ID_439	0	110,601.41	54,777.95
2-[4-(SULFOOXY)PHENYL]ACETIC ACID	ID_442	0	26,741.90	8,266.03
NALIDIXIC ACID	ID_443	0	35,107.73	24,864.93
MELATONIN	ID_445	0	108,064.16	71,367.05
DOPAMINE 4-SULFATE	ID_446	0	238,649.35	136,293.06
DOPAMINE 3-O-SULFATE	ID_447	0	29,765.25	2,438.12
2-HYDROXY-3-(SULFOOXY)BENZOIC ACID	ID_450	0	109,619.22	70,122.87
P-CHLOROBENZENE SULFONYL UREA	ID_451	0	61,169.38	27,573.40
RILUZOLE	ID_452	0	168,461.78	105,647.67
ZILEUTON	ID_455	0	80,802.66	1,266.86
2,6-DI-TERT-BUTYL-4-HYDROXY-4-METHYL-2,5-CYCLOHEXADIENONE	ID_457	0	52,084.23	28,346.44
4A-CARBINOLAMINE TETRAHYDROBIOPTERIN	ID_461	0	155,722.21	105,697.01
EQUOL	ID_469	0	93,194.04	36,309.57
CYTIDINE	ID_471	0	138,010.68	81,949.38
TIGLYLCARNITINE	ID_472	0	2,555.75	1,627.00
ETOMIDATE	ID_477	0	15,497.61	10,662.42
1,11-UNDECANEDICARBOXYLIC ACID	ID_478	0	50,981.88	20,105.43
2-HYDROXYMYRISTIC ACID	ID_479	0	81,326.62	31,712.06
2-[4-HYDROXY-3-(SULFOOXY)PHENYL]ACETIC ACID	ID_487	0	62,716.95	34,524.29
PYRIDOXAMINE 5'-PHOSPHATE	ID_489	0	65,132.82	40,150.66
PYRIMETHAMINE	ID_491	0	168,285.58	97,718.14
NOREPINEPHRINE SULFATE	ID_493	0	266,849.06	81,473.59
3,5-DIHYDROXY-4-(SULFOOXY)BENZOIC ACID	ID_497	0	176,246.88	103,181.70
URACIL MUSTARD	ID_502	0	130,874.30	40,044.41
5-HYDROXYKETAMINE	ID_512	0	45,358.41	13,917.00
N-ACETYLVANILALANINE	ID_514	0	81,148.01	49,901.46
1,2-BENZENEDIOL BIS(TRIMETHYLSILYL) ETHER	ID_517	0	58,191.48	14,075.44
KETOROLAC	ID_523	0	52,984.28	8,704.17
ATOMOXETINE	ID_524	0	33,295.67	17,782.40
DIPHENHYDRAMINE	ID_525	0	35,162.72	23,924.98
TRIPELENNAMINE	ID_526	0	94,596.62	51,705.48
NICOTINIC ACID RIBONUCLEOSIDE	ID_528	0	52,495.16	16,796.42
ETHOXZOLAMIDE	ID_534	0	99,732.82	54,153.32
FRUCTOSE 6-PHOSPHATE	ID_540	0	50,027.43	13,674.51
GLUCOSE 6-PHOSPHATE	ID_541	0	12,952.21	-2,057.50
MYO-INOSITOL 1-PHOSPHATE	ID_544	0	117,631.15	52,261.15
CYCLO(LEU-PHE)	ID_547	0	16,242.05	3,552.00
ASPARTYLLYSINE	ID_552	0	10,559.57	311.4
METHOHEXITAL	ID_559	0	159,971.84	-5,748.60
EPINEPHRINE SULFATE	ID_560	0	89,529.36	2,479.37
TICLOPIDINE	ID_561	0	84,840.96	61,983.90
NORTRIPTYLINE	ID_564	0	23,395.67	16,059.55
ACETYL-N-FORMYL-5-METHOXYKYNURENAMINE	ID_567	0	53,224.87	18,121.71
GAMMA-CEHC	ID_569	0	131,121.92	83,736.98
MIRTAZAPINE	ID_574	0	21,182.13	-6,064.59
2,3-DIPHOSPHOGLYCERIC ACID	ID_576	0	26,404.36	17,670.67
NEVIRAPINE	ID_577	0	22,252.67	9.78
DEOXYGUANOSINE	ID_581	0	81,304.86	37,095.69
METOPROLOL	ID_584	0	187,839.93	61,550.44
FORMONONETIN	ID_586	0	161,070.71	67,759.45
DEXRAZOXANE	ID_589	0	30,179.99	2,172.66
STEARALDEHYDE	ID_592	0	44,031.50	30,117.22
SELENOCYSTATHIONINE	ID_593	0	33,986.26	17,944.69
SULFAMETHIZOLE	ID_594	0	86,350.05	47,871.36
APIGENIN	ID_596	0	30,308.41	18,655.54
ESTRONE	ID_597	0	24,406.83	-13,324.48
HEPTADECANOIC ACID	ID_598	0	21,706.40	14,153.77
PELARGONIDIN	ID_600	0	14,213.77	-5,507.52
NORHYDROMORPHONE	ID_601	0	21,381.91	10,601.70
5C-AGLYCONE	ID_606	0	65,152.43	24,978.70
SOTALOL	ID_607	0	22,059.34	-6,559.18
MODAFINIL	ID_612	0	5,977.99	556.91
BIOTIN SULFONE	ID_620	0	227,927.96	93,170.84
STEARIDONIC ACID	ID_623	0	11,297.49	6,378.35
ENTECAVIR	ID_626	0	80,185.26	58,231.70
AMITRIPTYLINE	ID_627	0	79,153.11	4,979.03
3,5-DIMETHOXY-4-(SULFOOXY)BENZOIC ACID	ID_629	0	27,234.01	11,741.50
ISOVALERYLGLUCURONIDE	ID_630	0	230,866.16	131,097.45
CIDOFOVIR	ID_636	0	249,681.91	152,044.25
CIS-VACCENIC ACID	ID_643	0	61,493.77	10,160.40
PETROSELINIC ACID	ID_644	0	97,498.25	27,646.46
GUANOSINE	ID_646	0	44,675.01	-29,179.14
N-PHENYLACETYLPHENYLALANINE	ID_647	0	143,924.13	91,615.15
LEVALLORPHAN	ID_649	0	5,440.00	1,273.17
RETINAL	ID_657	0	19,682.27	12,713.08
N4-ACETYLCYTIDINE	ID_659	0	46,698.24	16,627.98
MORPHINE	ID_660	0	54,668.50	38,892.82
HYDROMORPHONE	ID_661	0	91,978.27	4,091.00
LUTEOLIN	ID_662	0	219,215.79	119,100.64
4-HYDROXY TOLBUTAMIDE	ID_664	0	107,247.55	30,754.91
4-HYDROXYESTRONE	ID_665	0	105,918.97	76,222.70
13-CIS RETINOL	ID_667	0	175,853.29	85,947.80
N1,N12-DIACETYLSPERMINE	ID_668	0	9,061.73	-1,550.59
CYANIDIN	ID_669	0	7,606.49	1,232.87
N-RIBOSYLHISTIDINE	ID_671	0	28,673.15	20,663.92
ETODOLAC	ID_672	0	110,133.90	78,820.77
ZOLMITRIPTAN	ID_673	0	73,572.92	46,304.39
CYPROHEPTADINE	ID_674	0	232,640.89	41,235.52
ERIODICTYOL	ID_678	0	177,542.27	103,176.08
ESTRIOL	ID_679	0	65,393.72	-17,362.97
DEHYDROEPIANDROSTERONE	ID_680	0	14,540.17	-10,336.23
ARGININOSUCCINIC ACID	ID_689	0	4,713.87	508.17
TRIMETHOPRIM	ID_690	0	18,494.00	-2,285.21
VERAPAMIL METABOLITE D-617	ID_691	0	31,203.08	3,656.00
SUCCINYLCHOLINE	ID_692	0	98,365.92	15,017.33
DIHYDROTESTOSTERONE	ID_694	0	67,403.71	31,241.34
4-ANDROSTENEDIOL	ID_695	0	19,807.26	14,356.96
BRIMONIDINE	ID_696	0	136,089.42	46,247.17
SODIUM TETRADECYL SULFATE	ID_705	0	47,968.85	31,302.68
13-OXOODE	ID_707	0	50,493.89	6,103.76
17A-ETHYNYLESTRADIOL	ID_713	0	213,242.04	121,548.67
CISPLATIN	ID_720	0	79,635.84	5,123.48
ENTEROLACTONE	ID_724	0	8,037.43	-759.84
SPHINGOSINE	ID_731	0	71,829.88	9,215.69
PALMITOYLETHANOLAMIDE	ID_733	0	114,721.80	-9,722.28
9-CIS-RETINOIC ACID	ID_737	0	91,886.15	21,434.53
13-CIS-RETINOIC ACID	ID_738	0	23,796.59	-12,585.65
MG(14:1(9Z)/0:0/0:0)	ID_741	0	34,478.01	23,976.60
QUERCETIN	ID_746	0	111,774.10	65,068.42
HESPERETIN	ID_748	0	49,481.07	32,357.69
MG(14:0/0:0/0:0)	ID_753	0	133,430.48	40,125.95
SERTRALINE	ID_759	0	27,052.08	12,006.95
4-HYDROXY-5-[4-HYDROXY-3-(SULFOOXY)PHENYL]PENTANOIC ACID	ID_763	0	10,054.00	-10,029.11
FLUCONAZOLE	ID_764	0	20,550.41	10,720.67
GLUTATHIONE	ID_769	0	94,058.61	59,724.00
BENZATROPINE	ID_770	0	7,339.25	-7,009.53
WARFARIN	ID_773	0	80,096.70	10,615.88
GESTRINONE	ID_776	0	44,614.95	-30,878.90
N-ACETYLNEURAMINIC ACID	ID_779	0	136,538.97	87,864.73
FLUOXETINE	ID_780	0	55,263.53	28,642.14
METIXENE	ID_781	0	93,101.82	59,348.63
N,O-BIS- (TRIMETHYLSILYL)PHENYLALANINE	ID_782	0	115,187.12	17,799.88
DICYCLOMINE	ID_784	0	25,752.35	17,939.81
DESOGESTREL	ID_787	0	66,042.73	5,089.88
3'-HYDROXYDICLOFENAC	ID_790	0	21,997.34	-14,701.83
N2,N2-DIMETHYLGUANOSINE	ID_791	0	98,135.94	61,163.31
DYDROGESTERONE	ID_797	0	23,897.37	8,264.29
9(S)-HPODE	ID_798	0	15,841.33	5,814.23
AMOXAPINE	ID_800	0	14,718.03	-1,304.85
REBOXETINE	ID_801	0	95,730.46	18,798.90
6-(3-CARBOXYPHENOXY)-3,4,5-TRIHYDROXYOXANE-2-CARBOXYLIC ACID	ID_802	0	108,230.11	59,640.33
PROGESTERONE	ID_807	0	20,643.31	-8,081.25
OXYCODONE	ID_811	0	66,210.26	8,809.54
4-HYDROXYRETINOIC ACID	ID_816	0	20,938.22	-4,651.00
MG(15:0/0:0/0:0)	ID_819	0	29,674.02	-7,634.92
5-HEPE	ID_829	0	13,562.34	5,948.60
TRIDIHEXETHYL	ID_834	0	16,011.46	-8,937.98
8,9-EPOXYEICOSATRIENOIC ACID	ID_838	0	418,541.48	96,468.22
16(R)-HETE	ID_843	0	81,352.97	16,929.56
18-HYDROXYARACHIDONIC ACID	ID_847	0	131,384.94	93,153.62
FAMCICLOVIR	ID_849	0	95,490.45	34,188.65
15(S)-HYDROXYEICOSATRIENOIC ACID	ID_851	0	38,460.79	8,927.30
DOLASETRON	ID_854	0	128,222.53	41,287.95
VALACICLOVIR	ID_855	0	34,424.88	6,571.08
OLEOYLETHANOLAMIDE	ID_862	0	285,008.09	192,711.74
CLOZAPINE	ID_863	0	8,110.96	-4,540.23
ACITRETIN	ID_864	0	9,473.91	1,036.25
STANOZOLOL	ID_870	0	17,306.46	11,601.38
CYCLIC AMP	ID_874	0	241,215.64	171,475.18
FUROSEMIDE	ID_876	0	96,646.71	22,848.02
6-(3-CARBOXY-5-HYDROXYPHENOXY)-3,4,5-TRIHYDROXYOXANE-2-CARBOXYLIC ACID	ID_882	0	208,654.65	144,229.47
6-(3-CARBOXY-2-HYDROXYPHENOXY)-3,4,5-TRIHYDROXYOXANE-2-CARBOXYLIC ACID	ID_883	0	85,389.73	10,940.04
6-(2-CARBOXY-6-HYDROXYPHENOXY)-3,4,5-TRIHYDROXYOXANE-2-CARBOXYLIC ACID	ID_884	0	76,281.79	41,215.48
MG(16:0/0:0/0:0)	ID_893	0	177,739.70	81,331.77
PIROXICAM	ID_895	0	30,978.31	18,503.44
CIPROFLOXACIN	ID_898	0	141,015.72	92,003.98
IPRATROPIUM BROMIDE	ID_901	0	36,262.49	17,972.29
GLYCEROPHOSPHOINOSITOL	ID_904	0	125,801.63	45,936.64
DOCOSATRIENOIC ACID	ID_911	0	23,422.61	14,459.93
NICOTINAMIDE RIBOTIDE	ID_912	0	142,739.07	54,719.63
SELENOCYSTINE	ID_913	0	41,941.25	11,244.18
6-TRANS-12-EPI-LEUKOTRIENE B4	ID_922	0	94,746.15	43,787.42
TENOXICAM	ID_924	0	100,806.79	52,276.68
2,8-DIHYDROXYQUINOLINE-BETA-D-GLUCURONIDE	ID_926	0	32,122.96	-12,297.84
AICAR	ID_929	0	29,820.83	5,162.72
NICOTINE GLUCURONIDE	ID_930	0	226,973.31	142,933.43
11,12-DIHETRE	ID_933	0	29,013.87	7,810.67
ERUCIC ACID	ID_935	0	164,893.71	64,939.83
CETOLEIC ACID	ID_936	0	75,151.36	-6,566.32
6-[3-(2-CARBOXYETH-1-EN-1-YL)PHENOXY]-3,4,5-TRIHYDROXYOXANE-2-CARBOXYLIC ACID	ID_943	0	80,289.87	38,062.15
PROPIOMAZINE	ID_944	0	19,188.19	-11,931.61
PENTAMIDINE	ID_945	0	66,723.87	45,488.71
6-[4-(CARBOXYMETHYL)-2-HYDROXYPHENOXY]-3,4,5-TRIHYDROXYOXANE-2-CARBOXYLIC ACID	ID_962	0	122,682.83	21,790.97
OXYPHENCYCLIMINE	ID_965	0	281,936.40	126,978.51
DODECANOYLCARNITINE	ID_967	0	189,932.10	71,911.86
CYCLIC GMP	ID_968	0	119,875.11	-11,091.90
OMEPRAZOLE	ID_970	0	136,873.92	98,582.02
5'-HYDROXYPIROXICAM	ID_977	0	186,014.81	24,831.24
TORASEMIDE	ID_981	0	58,737.55	28,923.34
BEXAROTENE	ID_982	0	23,092.72	13,859.70
R-138727	ID_986	0	57,297.99	8,528.33
PENICILLIN V	ID_988	0	173,634.11	68,789.90
PROSTAGLANDIN D3	ID_991	0	115,459.93	-23,151.77
TETRAHYDRODEOXYCORTISOL	ID_993	0	73,161.53	29,093.31
HALAZEPAM	ID_1000	0	81,371.43	37,777.31
LIPOXIN A4	ID_1010	0	30,847.09	10,603.88
MG(0:0/18:3(6Z,9Z,12Z)/0:0)	ID_1011	0	53,994.90	23,732.01
13,14-DIHYDRO-15-KETO PGF2A	ID_1022	0	110,746.17	79,040.37
8-ISOPROSTAGLANDIN F2A	ID_1023	0	121,964.69	36,750.16
PROSTAGLANDIN D1	ID_1024	0	21,599.66	7,732.60
MG(0:0/18:2(9Z,12Z)/0:0)	ID_1025	0	6,227.97	-5,702.33
PROSTAGLANDIN F1A	ID_1027	0	188,823.92	82,039.41
13,14-DIHYDRO PGE1	ID_1028	0	70,674.24	33,150.65
MG(18:1(11Z)/0:0/0:0)	ID_1031	0	66,798.93	22,193.00
6-[3-(2-CARBOXYETHYL)-5-HYDROXYPHENOXY]-3,4,5-TRIHYDROXYOXANE-2-CARBOXYLIC ACID	ID_1035	0	211,289.63	103,893.08
GREPAFLOXACIN	ID_1039	0	92,045.52	23,152.26
DITYROSINE	ID_1041	0	34,943.25	-18,254.89
OMEPRAZOLE SULFONE	ID_1045	0	12,983.86	-6,081.84
METOLAZONE	ID_1051	0	121,793.65	18,073.45
20-CARBOXY-LEUKOTRIENE B4	ID_1054	0	63,225.80	30,811.65
CHLORMERODRIN	ID_1057	0	128,074.98	1,827.01
6,15-DIKETO,13,14-DIHYDRO-PGF1A	ID_1060	0	140,261.06	36,095.06
PROPANTHELINE	ID_1063	0	129,314.93	12,202.70
CINNARIZINE	ID_1064	0	178,145.20	-61.98
CARBOPROST TROMETHAMINE	ID_1066	0	181,374.84	38,828.87
BETA-CORTOL	ID_1068	0	12,705.13	-3,248.17
ANDROSTERONE SULFATE	ID_1073	0	67,619.22	41,464.83
TETRAHYDROCURCUMIN	ID_1080	0	19,068.50	293.32
GENTIAN VIOLET	ID_1082	0	479,228.10	279,529.41
NABILONE	ID_1083	0	94,247.95	64,867.54
PROCHLORPERAZINE	ID_1085	0	9,558.24	6,740.03
6-HYDROXYMETHYLETORICOXIB	ID_1086	0	55,746.02	-12,522.55
CARBENICILLIN	ID_1097	0	15,441.89	-2,828.55
MG(0:0/20:4(5Z,8Z,11Z,14Z)/0:0)	ID_1100	0	70,704.78	20,012.39
MG(0:0/20:4(8Z,11Z,14Z,17Z)/0:0)	ID_1101	0	24,659.89	679.85
MG(20:3(5Z,8Z,11Z)/0:0/0:0)	ID_1108	0	37,584.27	2,850.29
PRAZOSIN	ID_1120	0	326,835.11	2,346.53
BORTEZOMIB	ID_1123	0	128,777.36	22,696.78
EICOSANOIC ACID, TRIMETHYLSILYL ESTER	ID_1131	0	54,930.42	-9,325.19
BUSPIRONE	ID_1135	0	8,317.08	735.55
MG(20:0/0:0/0:0)	ID_1137	0	93,750.56	12,295.26
5'-HYDROXYLORNOXICAM	ID_1140	0	340,805.72	180,611.82
HETACILLIN	ID_1147	0	28,317.39	8,167.56
ALFUZOSIN	ID_1148	0	55,641.06	28,471.68
AMSACRINE	ID_1154	0	45,244.27	15,652.83
LYSOPA(P-16:0/0:0)	ID_1156	0	124,408.13	19,193.78
SULFASALAZINE	ID_1164	0	55,664.42	17,407.49
6-[5-(4-CARBOXY-2-HYDROXYBUTYL)-2-HYDROXYPHENOXY]-3,4,5-TRIHYDROXYOXANE-2-CARBOXYLIC ACID	ID_1173	0	19,878.54	-11,580.51
MG(22:6(4Z,7Z,10Z,13Z,16Z,19Z)/0:0/0:0)	ID_1175	0	13,168.97	-5,885.65
24-HYDROXYCHOLESTEROL	ID_1176	0	34,060.90	-1,490.98
25-HYDROXYCHOLESTEROL	ID_1180	0	142,903.72	78,508.78
MG(22:5(4Z,7Z,10Z,13Z,16Z)/0:0/0:0)	ID_1189	0	65,422.23	30,172.29
TOREMIFENE	ID_1191	0	599,076.44	382,772.15
ALCLOMETASONE	ID_1196	0	156,106.08	40,959.91
LYSOPA(0:0/16:0)	ID_1199	0	101,291.74	-28,490.94
MG(0:0/22:1(13Z)/0:0)	ID_1207	0	209,930.45	92,427.37
HEPTADECANOYL CARNITINE	ID_1210	0	252,095.82	152,674.63
DILTIAZEM	ID_1211	0	116,219.89	59,795.92
ALFENTANIL	ID_1217	0	16,792.59	11,810.57
BETA-TOCOPHEROL	ID_1221	0	139,288.38	45,583.84
NIMODIPINE	ID_1222	0	24,683.53	14,267.24
BENDROFLUMETHIAZIDE	ID_1225	0	99,256.10	52,582.01
GAMMA-LINOLENYL CARNITINE	ID_1226	0	50,222.67	21,326.84
ALPHA-TOCOTRIENOL	ID_1230	0	133,836.34	46,867.77
MOMETASONE	ID_1237	0	28,076.18	11,042.14
OLEOYLCARNITINE	ID_1239	0	48,128.81	35,013.64
OXICONAZOLE	ID_1240	0	158,678.44	23,315.02
6-HYDROXYFLUVASTATIN	ID_1242	0	475,097.62	154,852.73
RANOLAZINE	ID_1244	0	105,141.82	45,735.49
TRANDOLAPRIL	ID_1246	0	22,029.47	1,948.40
ALPHA-TOCOPHEROL	ID_1247	0	45,134.33	-17,362.80
BENZTHIAZIDE	ID_1248	0	834,397.57	155,176.89
AZTREONAM	ID_1252	0	107,535.39	67,988.25
VALSARTAN	ID_1253	0	216,815.11	10,168.60
VARANIC ACID	ID_1254	0	99,284.34	50,430.43
LYSOPA(18:0/0:0)	ID_1257	0	23,085.48	-12,572.06
LYSOPE(15:0/0:0)	ID_1259	0	183,187.12	121,553.63
CANDESARTAN	ID_1260	0	76,722.05	9,752.33
OLMESARTAN	ID_1275	0	229,125.06	150,411.02
ARACHIDONOYLCARNITINE	ID_1277	0	282,364.97	168,867.33
LYSOPE(0:0/16:0)	ID_1281	0	53,636.61	35,637.73
5-METHYLTETRAHYDROFOLIC ACID	ID_1294	0	243,035.19	108,805.36
SORAFENIB	ID_1295	0	108,157.36	-21,764.45
TRIHYDROXYCOPROSTANOIC ACID	ID_1298	0	35,556.92	-16,319.78
DICLOXACILLIN	ID_1304	0	253,402.83	128,540.46
CEFMETAZOLE	ID_1306	0	61,592.17	17,100.28
MASLINIC ACID	ID_1310	0	478,941.01	297,193.11
FOLINIC ACID	ID_1311	0	42,016.36	13,211.70
RALOXIFENE	ID_1312	0	171,374.07	62,351.14
TUFTSIN	ID_1339	0	25,673.01	9,207.74
MALTOTRIOSE	ID_1342	0	36,292.89	-12,341.65
RAFFINOSE	ID_1343	0	115,280.93	69,210.19
LYSOPE(20:2(11Z,14Z)/0:0)	ID_1345	0	31,013.78	-6,359.00
CLOMOCYCLINE	ID_1346	0	660,494.96	220,064.33
CER(D18:0/14:0)	ID_1354	0	21,428.48	-8,902.84
LYSOPC(18:1(9Z)/0:0)	ID_1360	0	67,714.68	21,294.10
GUANOSINE TRIPHOSPHATE	ID_1361	0	160,667.28	52,653.58
5-CIS-LYCOPENE	ID_1367	0	59,564.26	42,040.78
GAMMA-CAROTENE	ID_1369	0	19,736.03	-7,768.59
9-CIS-BETA-CAROTENE	ID_1370	0	53,104.19	3,867.17
DG(14:1(9Z)/16:1(9Z)/0:0)	ID_1372	0	737,901.82	174,765.04
DG(16:1(9Z)/14:1(9Z)/0:0)	ID_1373	0	196,851.33	100,017.39
NEUROSPORENE	ID_1375	0	90,028.00	6,113.21
DG(14:1(9Z)/16:0/0:0)	ID_1377	0	135,134.44	-41,064.58
DG(15:0/15:0/0:0)	ID_1382	0	234,950.43	152,525.68
DG(16:0/14:0/0:0)	ID_1383	0	31,674.96	-27,838.06
PHYTOENE	ID_1387	0	133,725.94	38,252.69
(3R,6'R)-3-HYDROXY-3',4'-DIDEHYDRO-BETA,GAMMA-CAROTENE	ID_1389	0	146,361.87	98,578.35
2',3'-ANHYDROLUTEIN	ID_1390	0	144,048.14	37,414.21
CER(T18:0/16:0)	ID_1394	0	78,120.61	22,720.64
ATORVASTATIN	ID_1395	0	31,483.26	14,101.46
DG(14:0/18:3(6Z,9Z,12Z)/0:0)	ID_1398	0	72,794.78	23,223.83
DG(14:1(9Z)/18:2(9Z,12Z)/0:0)	ID_1400	0	283,402.85	74,493.40
DG(18:2(9Z,12Z)/14:1(9Z)/0:0)	ID_1401	0	261,289.75	186,049.77
DG(14:0/18:2(9Z,12Z)/0:0)	ID_1410	0	383,195.94	277,850.64
DG(14:1(9Z)/18:1(9Z)/0:0)	ID_1412	0	95,729.05	36,313.07
DG(14:0/18:1(9Z)/0:0)	ID_1424	0	241,337.96	106,156.12
DG(16:0/16:1(9Z)/0:0)	ID_1426	0	30,786.28	11,392.72
DG(18:1(11Z)/14:0/0:0)	ID_1429	0	87,275.51	23,317.51
ZEAXANTHIN	ID_1437	0	227,443.52	157,891.78
DG(14:0/18:0/0:0)	ID_1442	0	223,260.94	57,450.07
GADODIAMIDE	ID_1445	0	153,702.30	50,547.71
MONTELUKAST	ID_1452	0	22,911.51	-11,939.45
TIGECYCLINE	ID_1453	0	29,714.29	-4,445.37
DG(16:1(9Z)/18:3(9Z,12Z,15Z)/0:0)	ID_1463	0	70,114.41	31,532.01
DG(18:3(6Z,9Z,12Z)/16:1(9Z)/0:0)	ID_1464	0	213,464.17	82,080.41
DG(20:4(5Z,8Z,11Z,14Z)/14:0/0:0)	ID_1469	0	158,438.93	-10,626.24
UROBILIN	ID_1471	0	137,257.40	-46,893.11
UROBILINOGEN	ID_1472	0	125,952.64	6,152.38
DG(16:0/18:3(6Z,9Z,12Z)/0:0)	ID_1476	0	624.28	-147.35
DG(16:0/18:3(9Z,12Z,15Z)/0:0)	ID_1477	0	26,584.92	8,124.68
DG(20:2(11Z,14Z)/14:1(9Z)/0:0)	ID_1482	0	166,665.36	62,859.91
DG(14:1(9Z)/20:1(11Z)/0:0)	ID_1487	0	63,231.03	-33,729.74
DG(18:1(11Z)/16:1(9Z)/0:0)	ID_1491	0	96,696.21	37,189.82
DG(20:2(11Z,14Z)/14:0/0:0)	ID_1495	0	382,450.01	256,628.18
DG(14:1(9Z)/20:0/0:0)	ID_1498	0	171,132.80	106,485.64
DG(16:0/18:1(11Z)/0:0)	ID_1499	0	175,275.84	51,962.00
DG(18:1(11Z)/16:0/0:0)	ID_1503	0	194,898.12	129,468.50
DG(20:0/14:1(9Z)/0:0)	ID_1505	0	38,279.88	-15,831.81
TAUROCHOLIC ACID 3-SULFATE	ID_1507	0	58,248.09	25,606.55
ASTAXANTHIN	ID_1510	0	249,520.42	130,362.42
DG(16:0/18:0/0:0)	ID_1512	0	102,261.75	-87,393.07
LERCANIDIPINE	ID_1520	0	250,632.84	95,741.72
DG(14:1(9Z)/22:5(4Z,7Z,10Z,13Z,16Z)/0:0)	ID_1523	0	9,597.07	-3,321.53
DG(18:2(9Z,12Z)/18:4(6Z,9Z,12Z,15Z)/0:0)	ID_1526	0	74,717.40	-39,722.42
DG(18:4(6Z,9Z,12Z,15Z)/18:2(9Z,12Z)/0:0)	ID_1531	0	36,863.92	-25,605.08
INDINAVIR	ID_1536	0	32,930.44	-12,626.42
DG(18:1(11Z)/18:4(6Z,9Z,12Z,15Z)/0:0)	ID_1544	0	210,623.60	87,394.24
DG(18:3(6Z,9Z,12Z)/18:2(9Z,12Z)/0:0)	ID_1548	0	33,213.36	21,109.58
DG(18:3(9Z,12Z,15Z)/18:2(9Z,12Z)/0:0)	ID_1549	0	47,109.12	10,278.25
DG(22:5(7Z,10Z,13Z,16Z,19Z)/14:0/0:0)	ID_1557	0	143,545.80	99,927.64
HEME	ID_1558	0	408,007.52	222,122.75
DG(16:1(9Z)/20:3(5Z,8Z,11Z)/0:0)	ID_1561	0	17,709.78	-3,856.97
DG(16:1(9Z)/20:3(8Z,11Z,14Z)/0:0)	ID_1562	0	14,240.64	-5,019.84
DG(18:1(11Z)/18:3(9Z,12Z,15Z)/0:0)	ID_1565	0	156,227.54	19,027.90
DG(18:3(6Z,9Z,12Z)/18:1(11Z)/0:0)	ID_1569	0	156,357.88	-142,026.73
DG(18:3(9Z,12Z,15Z)/18:1(9Z)/0:0)	ID_1572	0	11,524.15	-9,136.36
DG(20:3(8Z,11Z,14Z)/16:1(9Z)/0:0)	ID_1575	0	10,159.87	-244.52
DG(16:1(9Z)/20:2(11Z,14Z)/0:0)	ID_1583	0	30,794.90	-7,404.59
DG(18:0/18:3(9Z,12Z,15Z)/0:0)	ID_1585	0	169,538.91	110,056.20
DG(20:3(8Z,11Z,14Z)/16:0/0:0)	ID_1594	0	182,142.46	82,487.94
DG(14:1(9Z)/22:1(13Z)/0:0)	ID_1597	0	293,692.27	-3,351.24
DG(16:1(9Z)/20:1(11Z)/0:0)	ID_1599	0	153,612.13	103,403.84
DG(18:1(9Z)/18:1(9Z)/0:0)	ID_1604	0	579,299.57	235,229.54
DG(14:0/22:1(13Z)/0:0)	ID_1611	0	166,091.14	112,782.40
DG(16:0/20:1(11Z)/0:0)	ID_1613	0	68,346.42	39,172.79
DG(18:1(9Z)/18:0/0:0)	ID_1618	0	87,094.42	20,051.67
CER(D18:0/22:0)	ID_1623	0	57,242.41	4,644.79
DG(18:0/18:0/0:0)	ID_1626	0	35,540.98	5,951.76
DG(20:0/16:0/0:0)	ID_1627	0	94,794.80	63,769.67
GLYCOCHENODEOXYCHOLIC ACID 3-GLUCURONIDE	ID_1630	0	165,738.69	115,692.44
REMIKIREN	ID_1631	0	68,319.56	25,877.33
CER(D18:0/23:0)	ID_1634	0	249,181.39	-116,607.84
DG(18:1(11Z)/20:5(5Z,8Z,11Z,14Z,17Z)/0:0)	ID_1639	0	129,214.86	93,178.08
DG(18:1(9Z)/20:5(5Z,8Z,11Z,14Z,17Z)/0:0)	ID_1640	0	41,474.39	26,700.21
DG(18:3(9Z,12Z,15Z)/20:3(8Z,11Z,14Z)/0:0)	ID_1646	0	51,265.84	-45,712.73
DG(18:4(6Z,9Z,12Z,15Z)/20:2(11Z,14Z)/0:0)	ID_1647	0	406,574.74	138,794.89
DG(20:3(8Z,11Z,14Z)/18:3(6Z,9Z,12Z)/0:0)	ID_1651	0	34,972.45	-3,636.81
DG(20:3(8Z,11Z,14Z)/18:3(9Z,12Z,15Z)/0:0)	ID_1652	0	74,535.87	43,345.45
DG(22:5(4Z,7Z,10Z,13Z,16Z)/16:1(9Z)/0:0)	ID_1657	0	72,191.90	39,275.30
DG(16:0/22:5(7Z,10Z,13Z,16Z,19Z)/0:0)	ID_1662	0	82,308.83	-35,289.56
DG(18:1(11Z)/20:4(5Z,8Z,11Z,14Z)/0:0)	ID_1665	0	115,207.21	65,297.51
DG(18:2(9Z,12Z)/20:3(5Z,8Z,11Z)/0:0)	ID_1669	0	600,617.98	414,586.80
DG(20:3(5Z,8Z,11Z)/18:2(9Z,12Z)/0:0)	ID_1677	0	221,393.45	55,500.97
DG(20:5(5Z,8Z,11Z,14Z,17Z)/18:0/0:0)	ID_1683	0	179,970.39	15,724.77
DG(22:5(4Z,7Z,10Z,13Z,16Z)/16:0/0:0)	ID_1685	0	224,862.50	162,085.97
GLCCER(D18:1/12:0)	ID_1687	0	66,657.52	-31,559.46
DG(18:1(9Z)/20:3(8Z,11Z,14Z)/0:0)	ID_1693	0	255,346.39	144,517.22
DG(18:2(9Z,12Z)/20:2(11Z,14Z)/0:0)	ID_1694	0	95,932.54	28,035.99
DG(18:4(6Z,9Z,12Z,15Z)/20:0/0:0)	ID_1697	0	20,196.86	-17,044.62
DG(20:2(11Z,14Z)/18:2(9Z,12Z)/0:0)	ID_1701	0	823,292.04	229,174.85
DG(20:3(8Z,11Z,14Z)/18:1(9Z)/0:0)	ID_1705	0	173,449.05	84,515.49
DG(20:4(5Z,8Z,11Z,14Z)/18:0/0:0)	ID_1706	0	1,485.91	-1,454.17
DG(22:4(7Z,10Z,13Z,16Z)/16:0/0:0)	ID_1708	0	274,701.83	194,257.64
DG(18:1(11Z)/20:2(11Z,14Z)/0:0)	ID_1713	0	36,757.62	-11,515.79
DG(18:1(9Z)/20:2(11Z,14Z)/0:0)	ID_1714	0	12,887.07	-6,371.37
DG(18:2(9Z,12Z)/20:1(11Z)/0:0)	ID_1715	0	37,024.88	23,443.65
DG(20:2(11Z,14Z)/18:1(11Z)/0:0)	ID_1721	0	149,281.34	67,447.92
DG(20:3(8Z,11Z,14Z)/18:0/0:0)	ID_1724	0	120,970.41	28,513.96
DG(16:1(9Z)/22:1(13Z)/0:0)	ID_1729	0	60,253.68	17,735.37
DG(18:2(9Z,12Z)/20:0/0:0)	ID_1733	0	351,363.79	44,658.83
DG(20:0/18:2(9Z,12Z)/0:0)	ID_1734	0	37,069.26	-21,693.15
DG(16:1(9Z)/22:0/0:0)	ID_1746	0	43,039.01	10,526.17
DG(20:0/18:1(11Z)/0:0)	ID_1750	0	626,532.28	5,083.53
DG(20:1(11Z)/18:0/0:0)	ID_1752	0	106,795.81	30,853.38
DG(22:0/16:1(9Z)/0:0)	ID_1753	0	66,705.07	41,146.35
DG(24:0/14:1(9Z)/0:0)	ID_1755	0	18,262.06	13,222.49
DG(22:0/16:0/0:0)	ID_1763	0	40,814.55	-13,322.28
TENIPOSIDE	ID_1765	0	25,866.11	7,500.20
COPROPORPHYRINOGEN I	ID_1766	0	165,263.63	35,943.69
CER(D18:1/25:0)	ID_1768	0	243,542.82	66,328.38
NATAMYCIN	ID_1770	0	122,532.82	73,448.32
DG(18:1(9Z)/22:6(4Z,7Z,10Z,13Z,16Z,19Z)/0:0)	ID_1774	0	71,349.28	12,750.77
DG(18:2(9Z,12Z)/22:5(4Z,7Z,10Z,13Z,16Z)/0:0)	ID_1775	0	23,845.60	187.54
DG(18:3(9Z,12Z,15Z)/22:4(7Z,10Z,13Z,16Z)/0:0)	ID_1778	0	578,361.68	209,084.55
DG(20:3(5Z,8Z,11Z)/20:4(8Z,11Z,14Z,17Z)/0:0)	ID_1781	0	167,845.94	105,154.82
DG(20:3(8Z,11Z,14Z)/20:4(5Z,8Z,11Z,14Z)/0:0)	ID_1782	0	287,770.31	59,387.01
DG(20:4(5Z,8Z,11Z,14Z)/20:3(8Z,11Z,14Z)/0:0)	ID_1785	0	407,439.43	272,873.69
DG(20:4(8Z,11Z,14Z,17Z)/20:2(11Z,14Z)/0:0)	ID_1810	0	1,437,634.79	294,231.77
DG(20:5(5Z,8Z,11Z,14Z,17Z)/20:1(11Z)/0:0)	ID_1811	0	204,250.79	116,130.80
DG(22:6(4Z,7Z,10Z,13Z,16Z,19Z)/18:0/0:0)	ID_1818	0	189,792.68	79,166.51
DG(18:0/22:5(4Z,7Z,10Z,13Z,16Z)/0:0)	ID_1819	0	229,090.88	76,032.56
DG(20:2(11Z,14Z)/20:3(5Z,8Z,11Z)/0:0)	ID_1829	0	7,330.74	3,642.45
DG(22:1(13Z)/18:4(6Z,9Z,12Z,15Z)/0:0)	ID_1836	0	552,299.62	252,313.97
DG(22:4(7Z,10Z,13Z,16Z)/18:1(11Z)/0:0)	ID_1839	0	40,699.20	-18,120.70
DG(22:4(7Z,10Z,13Z,16Z)/18:1(9Z)/0:0)	ID_1840	0	95,760.25	42,114.71
DG(18:1(11Z)/20:3(5Z,8Z,11Z)/0:0)	ID_1846	0	63,842.05	-18,197.78
DG(18:3(6Z,9Z,12Z)/22:1(13Z)/0:0)	ID_1848	0	37,936.64	-6,351.00
DG(20:0/20:4(5Z,8Z,11Z,14Z)/0:0)	ID_1851	0	138,865.03	-37,570.95
DG(20:0/20:4(8Z,11Z,14Z,17Z)/0:0)	ID_1852	0	23,435.64	1,403.25
DG(20:1(11Z)/20:3(5Z,8Z,11Z)/0:0)	ID_1853	0	20,574.68	-20,152.51
DG(20:2(11Z,14Z)/20:2(11Z,14Z)/0:0)	ID_1855	0	248,323.24	66,742.32
DG(20:3(5Z,8Z,11Z)/20:1(11Z)/0:0)	ID_1856	0	85,233.84	26,719.23
DG(20:4(5Z,8Z,11Z,14Z)/20:0/0:0)	ID_1858	0	75,326.37	48,305.88
DG(22:4(7Z,10Z,13Z,16Z)/18:0/0:0)	ID_1864	0	66,003.10	-31,913.49
PA(16:0/18:1(11Z))	ID_1868	0	873,455.33	560,682.31
PC(14:0/14:1(9Z))	ID_1871	0	185,404.75	9,884.00
DG(18:0/22:2(13Z,16Z)/0:0)	ID_1873	0	45,318.58	-7,056.16
PE(14:0/18:0)	ID_1883	0	105,521.45	76,235.53
PE(P-16:0/18:2(9Z,12Z))	ID_1886	0	294,318.46	62,662.87
GLCCER(D18:1/16:0)	ID_1887	0	67,271.96	22,802.93
PA(18:1(11Z)/18:1(11Z))	ID_1889	0	168,252.09	66,147.24
PC(16:1(9Z)/14:1(9Z))	ID_1894	0	138,549.59	35,439.10
PE(P-16:0/18:1(9Z))	ID_1898	0	9,957.86	250.59
PE(15:0/18:1(9Z))	ID_1901	0	21,424.96	10,212.92
PC(15:0/15:0)	ID_1904	0	588,502.95	424,539.29
PE(18:0/15:0)	ID_1906	0	239,324.64	169,479.72
LACTO-N-TETRAOSE	ID_1907	0	182,501.34	99,302.91
NEOLACTOTETRAOSE	ID_1908	0	13,954.30	-4,958.52
PC(P-18:1(9Z)/14:1(9Z))	ID_1914	0	102,572.45	64,392.22
PE(16:0/18:2(9Z,12Z))	ID_1915	0	115,316.55	-278.35
PC(14:0/P-18:1(11Z))	ID_1916	0	264,553.11	116,509.70
PC(P-16:0/16:1(9Z))	ID_1920	0	400,517.81	71,518.40
PC(P-18:0/14:1(9Z))	ID_1921	0	34,617.81	10,790.66
PC(P-18:1(11Z)/14:0)	ID_1922	0	299,638.71	177,597.37
VALRUBICIN	ID_1934	0	138,474.50	94,204.59
PC(14:1(9Z)/18:3(9Z,12Z,15Z))	ID_1939	0	47,700.43	-8,117.66
PC(18:3(9Z,12Z,15Z)/14:1(9Z))	ID_1941	0	267,798.76	21,717.11
GLCCER(D18:1/9Z-18:1)	ID_1943	0	111,970.28	65,581.74
PC(14:0/18:3(6Z,9Z,12Z))	ID_1944	0	166,208.01	100,111.32
PC(14:0/18:3(9Z,12Z,15Z))	ID_1945	0	305,487.97	134,030.46
PC(18:2(9Z,12Z)/14:1(9Z))	ID_1947	0	113,040.88	39,759.26
PE(18:1(11Z)/P-18:1(11Z))	ID_1950	0	139,471.39	50,634.00
PE(20:2(11Z,14Z)/P-16:0)	ID_1955	0	473,389.16	266,334.35
PE(P-16:0/20:2(11Z,14Z))	ID_1956	0	438,654.76	157,528.67
PC(P-16:0/P-18:1(11Z))	ID_1962	0	196,532.75	95,970.79
PC(14:0/18:2(9Z,12Z))	ID_1967	0	11,132.36	-4,414.94
PC(14:1(9Z)/18:1(11Z))	ID_1968	0	309,375.66	196,441.61
PC(14:1(9Z)/18:1(9Z))	ID_1969	0	69,990.51	22,614.83
PE(18:0/P-18:1(11Z))	ID_1974	0	5,063.66	-954.25
PE(18:0/P-18:1(9Z))	ID_1975	0	105,697.21	-5,168.46
PE(18:1(9Z)/P-18:0)	ID_1977	0	155,919.01	-37,865.80
PE(P-18:0/18:1(9Z))	ID_1981	0	219,864.04	93,276.95
PE(P-18:1(9Z)/18:0)	ID_1983	0	144,987.69	75,524.29
PC(18:1(9Z)/14:0)	ID_1993	0	237,484.16	131,627.63
PC(P-16:0/18:4(6Z,9Z,12Z,15Z))	ID_1999	0	12,557.92	-649.18
PC(P-18:1(11Z)/16:1(9Z))	ID_2010	0	412,793.79	121,108.71
PE(16:0/20:2(11Z,14Z))	ID_2015	0	303,822.79	24,952.23
PE(20:2(11Z,14Z)/16:0)	ID_2022	0	44,187.12	-29,374.24
PE(22:2(13Z,16Z)/14:0)	ID_2024	0	25,673.35	-8,831.95
PE(18:1(9Z)/18:1(9Z))	ID_2026	0	187,259.43	89,711.02
PC(P-18:1(9Z)/16:0)	ID_2037	0	452,569.78	146,825.34
NADPH	ID_2039	0	80,583.32	25,812.07
PE(16:0/20:1(11Z))	ID_2042	0	1,217,344.37	505,200.13
PE(20:0/16:1(9Z))	ID_2046	0	436,120.61	108,762.92
PE(20:1(11Z)/16:0)	ID_2047	0	68,399.60	37,191.30
PG(18:2(9Z,12Z)/16:0)	ID_2057	0	584,873.05	-23,836.22
PG(18:0/16:1(9Z))	ID_2062	0	553,363.23	366,003.87
PG(18:1(9Z)/16:0)	ID_2064	0	331,550.41	98,434.30
PE(20:4(5Z,8Z,11Z,14Z)/P-18:0)	ID_2065	0	46,095.04	9,950.76
VINDESINE	ID_2067	0	757,802.64	312,595.05
PC(14:0/20:4(8Z,11Z,14Z,17Z))	ID_2069	0	14,232.97	8,420.10
PC(14:1(9Z)/20:3(8Z,11Z,14Z))	ID_2071	0	1,122,599.07	434,899.97
PC(18:3(9Z,12Z,15Z)/16:1(9Z))	ID_2076	0	144,300.66	87,037.54
PC(18:4(6Z,9Z,12Z,15Z)/16:0)	ID_2077	0	897,555.79	548,743.83
PC(20:3(8Z,11Z,14Z)/14:1(9Z))	ID_2079	0	158,019.04	79,250.43
PC(14:0/20:3(8Z,11Z,14Z))	ID_2089	0	31,538.19	-10,760.93
PC(14:1(9Z)/20:2(11Z,14Z))	ID_2090	0	13,317.24	-10,868.67
PC(18:2(9Z,12Z)/16:1(9Z))	ID_2094	0	146,688.59	67,673.24
PC(18:3(9Z,12Z,15Z)/16:0)	ID_2096	0	212,037.27	62,195.83
PC(20:3(8Z,11Z,14Z)/14:0)	ID_2099	0	6,326.79	-5,550.41
PE(22:2(13Z,16Z)/P-16:0)	ID_2103	0	140,594.29	-72,593.02
PE(P-18:1(9Z)/20:1(11Z))	ID_2107	0	77,918.09	1,871.51
PC(P-18:1(11Z)/P-18:0)	ID_2110	0	90,779.55	-84,256.00
GLCCER(D18:1/20:0)	ID_2112	0	257,260.47	75,856.88
PC(16:1(9Z)/18:1(9Z))	ID_2117	0	276,486.14	-39,350.16
PC(20:2(11Z,14Z)/14:0)	ID_2122	0	337,798.61	102,807.69
PE(P-16:0/22:1(13Z))	ID_2129	0	141,862.80	58,849.70
PE(P-18:0/20:1(11Z))	ID_2130	0	95,862.87	-18,246.15
PE(P-18:1(9Z)/20:0)	ID_2132	0	40,382.94	9,565.99
PC(16:0/18:1(11Z))	ID_2135	0	95,469.11	-74,820.60
PC(16:0/18:1(9Z))	ID_2136	0	251,328.96	175,343.96
PC(18:1(11Z)/16:0)	ID_2139	0	270,408.28	190,146.74
PC(18:1(9Z)/16:0)	ID_2140	0	464,624.01	116,935.85
PC(20:0/14:1(9Z))	ID_2141	0	81,143.63	-48,100.79
PC(P-18:1(11Z)/18:4(6Z,9Z,12Z,15Z))	ID_2146	0	24,049.07	-21,042.47
PC(P-18:1(9Z)/18:4(6Z,9Z,12Z,15Z))	ID_2147	0	1,403,021.13	572,997.30
PC(18:3(6Z,9Z,12Z)/P-18:1(9Z))	ID_2149	0	45,973.79	-18,475.45
PC(18:3(9Z,12Z,15Z)/P-18:1(9Z))	ID_2151	0	178,836.23	73,906.15
PC(18:4(6Z,9Z,12Z,15Z)/P-18:0)	ID_2152	0	212,539.22	-127,402.56
PC(P-18:1(11Z)/18:3(9Z,12Z,15Z))	ID_2158	0	67,060.89	324.83
PC(P-18:1(9Z)/18:3(9Z,12Z,15Z))	ID_2160	0	158,482.94	38,288.68
PENTAGASTRIN	ID_2161	0	1,086,286.33	524,621.17
PE(20:4(8Z,11Z,14Z,17Z)/18:0)	ID_2163	0	163,114.97	66,793.69
PG(16:1(9Z)/20:4(5Z,8Z,11Z,14Z))	ID_2176	0	118,656.85	33,626.14
PG(18:2(9Z,12Z)/18:3(9Z,12Z,15Z))	ID_2178	0	753,302.78	517,994.59
PG(18:3(9Z,12Z,15Z)/18:2(9Z,12Z))	ID_2180	0	33,023.06	-28,122.13
PE(20:3(5Z,8Z,11Z)/18:0)	ID_2181	0	315,028.93	80,237.33
PC(18:1(9Z)/P-18:1(9Z))	ID_2186	0	21,925.63	-4,843.12
PC(P-18:1(9Z)/18:1(11Z))	ID_2193	0	183,394.30	-41,357.49
PG(18:1(11Z)/18:3(9Z,12Z,15Z))	ID_2199	0	96,821.22	16,663.62
PG(18:2(9Z,12Z)/18:2(9Z,12Z))	ID_2202	0	165,418.91	114,371.02
PG(18:3(9Z,12Z,15Z)/18:1(11Z))	ID_2205	0	219,932.02	123,678.18
PE(14:1(9Z)/24:1(15Z))	ID_2207	0	415,307.63	143,255.75
PE(16:1(9Z)/22:1(13Z))	ID_2209	0	557,663.65	-113,692.12
PE(18:0/20:2(11Z,14Z))	ID_2210	0	802,147.91	466,363.01
PE(18:1(11Z)/20:1(11Z))	ID_2211	0	180,644.50	31,027.38
PE(18:1(9Z)/20:1(11Z))	ID_2212	0	93,891.96	-85,853.13
PE(18:2(9Z,12Z)/20:0)	ID_2213	0	10,876.71	-3,523.05
PE(24:1(15Z)/14:1(9Z))	ID_2220	0	57,301.18	-1,846.44
PC(20:1(11Z)/P-16:0)	ID_2225	0	901,578.00	-20,088.13
PG(18:1(9Z)/18:2(9Z,12Z))	ID_2236	0	377,010.76	261,740.61
PE(20:0/18:1(11Z))	ID_2248	0	129,315.23	-65,577.20
PE(20:1(11Z)/18:0)	ID_2250	0	297,515.45	73,262.35
PE(22:1(13Z)/16:0)	ID_2252	0	152,040.13	37,158.05
PC(18:0/P-18:0)	ID_2255	0	39,415.10	17,585.12
PG(18:0/18:2(9Z,12Z))	ID_2259	0	194,311.30	64,583.58
PG(18:0/18:1(9Z))	ID_2267	0	471,178.97	147,406.62
PG(18:1(9Z)/18:0)	ID_2269	0	104,429.40	65,207.97
DEXTROTHYROXINE	ID_2271	0	83,761.99	25,777.81
PC(14:1(9Z)/22:5(4Z,7Z,10Z,13Z,16Z))	ID_2273	0	151,656.68	48,592.03
PC(16:1(9Z)/20:5(5Z,8Z,11Z,14Z,17Z))	ID_2275	0	203,756.33	-25,859.92
PC(18:2(9Z,12Z)/18:4(6Z,9Z,12Z,15Z))	ID_2276	0	120,187.65	59,927.30
PC(18:3(6Z,9Z,12Z)/18:3(9Z,12Z,15Z))	ID_2278	0	323,840.37	103,072.57
PC(18:3(9Z,12Z,15Z)/18:3(6Z,9Z,12Z))	ID_2279	0	17,813.17	-8,402.49
PC(18:4(6Z,9Z,12Z,15Z)/18:2(9Z,12Z))	ID_2281	0	29,761.57	15,550.90
PC(22:5(4Z,7Z,10Z,13Z,16Z)/14:1(9Z))	ID_2283	0	23,111.44	-7,407.86
PE(P-18:1(11Z)/22:4(7Z,10Z,13Z,16Z))	ID_2292	0	100,262.33	12,368.58
3'-SIALYL-3-FUCOSYLLACTOSE	ID_2295	0	97,578.43	49,188.22
PC(14:0/22:5(4Z,7Z,10Z,13Z,16Z))	ID_2296	0	234,743.54	94,587.05
PC(16:1(9Z)/20:4(8Z,11Z,14Z,17Z))	ID_2301	0	170,730.31	42,663.55
PE(P-18:0/22:4(7Z,10Z,13Z,16Z))	ID_2317	0	107,231.31	44,708.88
PC(16:0/20:4(5Z,8Z,11Z,14Z))	ID_2320	0	321,277.31	31,414.28
PC(16:1(9Z)/20:3(5Z,8Z,11Z))	ID_2322	0	80,036.09	-12,238.88
PC(18:1(11Z)/18:3(6Z,9Z,12Z))	ID_2325	0	77,362.39	2,429.94
PC(18:1(11Z)/18:3(9Z,12Z,15Z))	ID_2326	0	92,880.73	7,461.65
PC(18:1(9Z)/18:3(9Z,12Z,15Z))	ID_2328	0	152,592.14	99,392.92
PC(18:3(6Z,9Z,12Z)/18:1(11Z))	ID_2330	0	169,095.67	-27,044.68
PC(18:3(6Z,9Z,12Z)/18:1(9Z))	ID_2331	0	9,834.95	504.42
PC(20:3(8Z,11Z,14Z)/16:1(9Z))	ID_2336	0	67,935.20	22,611.83
PC(22:4(7Z,10Z,13Z,16Z)/14:0)	ID_2339	0	1,193,702.19	768,507.38
PC(14:1(9Z)/22:2(13Z,16Z))	ID_2340	0	619,540.18	123,850.04
PC(16:0/20:3(5Z,8Z,11Z))	ID_2341	0	60,207.46	-21,038.72
PC(18:1(11Z)/18:2(9Z,12Z))	ID_2346	0	2,063,989.14	578,420.79
PC(18:1(9Z)/18:2(9Z,12Z))	ID_2347	0	154,981.36	36,661.81
PC(18:2(9Z,12Z)/18:1(11Z))	ID_2348	0	55,265.06	726.42
PC(18:3(6Z,9Z,12Z)/18:0)	ID_2350	0	44,700.50	3,345.68
PC(20:3(5Z,8Z,11Z)/16:0)	ID_2353	0	942,385.57	518,533.98
PC(22:2(13Z,16Z)/14:1(9Z))	ID_2355	0	1,053,324.51	419,140.60
SM(D16:1/24:1(15Z))	ID_2357	0	632,631.16	176,957.53
PC(16:0/20:2(11Z,14Z))	ID_2360	0	108,132.20	1,678.41
PC(18:1(11Z)/18:1(9Z))	ID_2364	0	1,089,111.79	399,782.38
PC(20:1(11Z)/16:1(9Z))	ID_2367	0	214,826.36	-178,995.21
PC(22:2(13Z,16Z)/14:0)	ID_2370	0	350,740.46	110,128.51
PC(18:1(11Z)/18:0)	ID_2377	0	43,604.61	-27,124.14
PC(22:1(13Z)/14:0)	ID_2382	0	1,461,051.01	912,858.34
PC(20:5(5Z,8Z,11Z,14Z,17Z)/P-18:1(11Z))	ID_2384	0	97,353.66	-70,128.19
PC(P-18:1(9Z)/20:5(5Z,8Z,11Z,14Z,17Z))	ID_2389	0	49,663.92	-22,793.43
DG(24:1(15Z)/24:0/0:0)	ID_2395	0	313,056.12	27,019.19
PC(20:4(8Z,11Z,14Z,17Z)/P-18:1(9Z))	ID_2400	0	142,196.24	54,500.15
PE(18:1(9Z)/22:4(7Z,10Z,13Z,16Z))	ID_2413	0	130,115.79	49,531.16
PE(18:3(9Z,12Z,15Z)/22:2(13Z,16Z))	ID_2415	0	94,872.09	-85,473.25
PE(20:2(11Z,14Z)/20:3(5Z,8Z,11Z))	ID_2420	0	290,750.65	75,557.57
PE(22:1(13Z)/18:4(6Z,9Z,12Z,15Z))	ID_2427	0	147,626.63	17,480.98
PE(22:4(7Z,10Z,13Z,16Z)/18:1(9Z))	ID_2431	0	1,400,473.95	886,496.94
PC(P-18:0/20:4(5Z,8Z,11Z,14Z))	ID_2442	0	663,126.32	412,183.76
PC(P-18:1(11Z)/20:3(5Z,8Z,11Z))	ID_2444	0	33,597.80	15,902.52
PC(P-18:1(9Z)/20:3(8Z,11Z,14Z))	ID_2447	0	900,000.40	570,121.32
PG(18:3(6Z,9Z,12Z)/20:3(8Z,11Z,14Z))	ID_2453	0	481,766.80	119,446.89
PE(18:3(9Z,12Z,15Z)/22:1(13Z))	ID_2460	0	34,886.41	8,982.28
PE(18:4(6Z,9Z,12Z,15Z)/22:0)	ID_2461	0	255,142.76	145,124.28
PE(20:4(5Z,8Z,11Z,14Z)/20:0)	ID_2469	0	432,661.53	277,742.67
PE(20:4(8Z,11Z,14Z,17Z)/20:0)	ID_2470	0	955,883.79	289,198.63
PE(22:0/18:4(6Z,9Z,12Z,15Z))	ID_2471	0	586,603.79	132,045.42
PE(22:2(13Z,16Z)/18:2(9Z,12Z))	ID_2474	0	85,210.16	-9,531.56
PG(16:0/22:5(4Z,7Z,10Z,13Z,16Z))	ID_2484	0	2,088,652.53	1,160,737.55
PG(16:1(9Z)/22:4(7Z,10Z,13Z,16Z))	ID_2486	0	110,464.74	-60,460.02
PG(18:2(9Z,12Z)/20:3(5Z,8Z,11Z))	ID_2489	0	930,274.51	152,936.71
PG(18:1(11Z)/20:3(5Z,8Z,11Z))	ID_2493	0	362,432.51	137,145.26
SM(D17:1/24:1(15Z))	ID_2497	0	79,091.61	-23,266.13
PC(20:1(11Z)/P-18:0)	ID_2500	0	483,084.91	229,298.29
PC(P-16:0/22:1(13Z))	ID_2502	0	92,849.11	-40,624.75
PC(P-18:0/20:1(11Z))	ID_2503	0	474,058.86	188,858.88
PC(P-18:1(9Z)/20:0)	ID_2505	0	883,003.46	142,890.42
TG(16:0/16:1(9Z)/16:1(9Z))	ID_2512	0	945,405.32	528,776.20
PC(16:1(9Z)/22:5(7Z,10Z,13Z,16Z,19Z))	ID_2517	0	311,215.15	71,164.92
PC(18:2(9Z,12Z)/20:4(5Z,8Z,11Z,14Z))	ID_2520	0	700,774.38	314,578.23
PC(20:2(11Z,14Z)/18:4(6Z,9Z,12Z,15Z))	ID_2527	0	1,478,343.62	1,008,032.45
PC(20:5(5Z,8Z,11Z,14Z,17Z)/18:1(9Z))	ID_2535	0	1,012,323.05	403,002.16
PC(16:1(9Z)/22:4(7Z,10Z,13Z,16Z))	ID_2543	0	48,813.48	29,383.92
PC(18:0/20:5(5Z,8Z,11Z,14Z,17Z))	ID_2544	0	53,413.52	37,870.96
PC(18:1(11Z)/20:4(8Z,11Z,14Z,17Z))	ID_2546	0	582,464.04	380,748.19
PC(18:2(9Z,12Z)/20:3(5Z,8Z,11Z))	ID_2549	0	1,342,606.83	-816,327.32
PC(20:1(11Z)/18:4(6Z,9Z,12Z,15Z))	ID_2554	0	1,078,461.04	104,684.44
PC(20:4(5Z,8Z,11Z,14Z)/18:1(11Z))	ID_2559	0	51,684.16	-6,669.78
PC(20:4(5Z,8Z,11Z,14Z)/18:1(9Z))	ID_2560	0	1,423,948.02	-498,460.27
PC(20:5(5Z,8Z,11Z,14Z,17Z)/18:0)	ID_2563	0	2,933,197.51	679,012.60
PC(22:4(7Z,10Z,13Z,16Z)/16:1(9Z))	ID_2564	0	296,581.73	152,355.97
PC(22:5(7Z,10Z,13Z,16Z,19Z)/16:0)	ID_2566	0	119,608.30	-62,333.69
PIMECROLIMUS	ID_2569	0	97,875.25	2,361.67
PC(20:4(5Z,8Z,11Z,14Z)/18:0)	ID_2589	0	133,761.97	23,275.81
GLCCER(D18:1/24:1(15Z))	ID_2592	0	195,157.76	23,858.53
VINBLASTINE	ID_2593	0	205,589.71	-71,702.98
PC(20:3(8Z,11Z,14Z)/18:0)	ID_2609	0	586,141.67	278,376.74
PC(14:1(9Z)/24:0)	ID_2614	0	167,049.86	-31,728.02
PC(16:0/22:1(13Z))	ID_2615	0	481,498.78	339,687.85
PC(18:0/20:1(11Z))	ID_2617	0	81,393.61	4,202.29
PC(18:1(11Z)/20:0)	ID_2618	0	324,458.07	127,668.96
PC(22:0/16:1(9Z))	ID_2623	0	582,336.35	409,588.08
PC(P-18:1(9Z)/22:5(4Z,7Z,10Z,13Z,16Z))	ID_2637	0	411,253.33	253,394.20
PC(18:0/20:0)	ID_2641	0	1,034,163.28	469,650.73
PC(22:0/16:0)	ID_2643	0	156,673.85	59,213.83
PG(18:2(9Z,12Z)/22:6(4Z,7Z,10Z,13Z,16Z,19Z))	ID_2645	0	492,675.77	256,190.51
PC(P-18:0/22:5(7Z,10Z,13Z,16Z,19Z))	ID_2655	0	203,217.53	29,079.43
PC(P-18:1(9Z)/22:4(7Z,10Z,13Z,16Z))	ID_2657	0	2,297,082.74	1,538,254.51
PG(18:2(9Z,12Z)/22:5(4Z,7Z,10Z,13Z,16Z))	ID_2660	0	47,442.61	22,382.31
PG(18:2(9Z,12Z)/22:5(7Z,10Z,13Z,16Z,19Z))	ID_2661	0	145,095.76	31,981.62
PG(18:1(11Z)/22:4(7Z,10Z,13Z,16Z))	ID_2679	0	191,827.66	31,985.83
TG(16:1(9Z)/16:1(9Z)/18:2(9Z,12Z))	ID_2690	0	2,541,902.26	1,699,500.16
PC(22:0/P-18:1(11Z))	ID_2691	0	759,009.01	-42,820.94
PC(P-18:1(9Z)/22:0)	ID_2698	0	479,248.03	232,961.87
TG(16:0/16:1(9Z)/18:2(9Z,12Z))	ID_2699	0	1,013,060.35	129,472.60
PC(P-16:0/24:0)	ID_2703	0	27,561.26	-170.85
TG(16:0/16:1(9Z)/18:1(9Z))	ID_2706	0	127,175.65	-65,935.18
TG(16:0/16:0/18:1(9Z))	ID_2708	0	641,678.42	-228,248.33
PC(18:1(9Z)/22:5(7Z,10Z,13Z,16Z,19Z))	ID_2714	0	1,038,086.41	177,892.60
PC(18:4(6Z,9Z,12Z,15Z)/22:2(13Z,16Z))	ID_2716	0	451,168.99	136,767.71
PC(20:3(5Z,8Z,11Z)/20:3(5Z,8Z,11Z))	ID_2720	0	6,350.30	-2,469.91
PC(20:4(5Z,8Z,11Z,14Z)/20:2(11Z,14Z))	ID_2724	0	430,080.83	-45,880.36
PC(20:4(8Z,11Z,14Z,17Z)/20:2(11Z,14Z))	ID_2725	0	1,913,133.98	-55,631.79
PC(22:6(4Z,7Z,10Z,13Z,16Z,19Z)/18:0)	ID_2733	0	66,831.54	-7,704.49
PI(16:1(9Z)/18:1(9Z))	ID_2735	0	138,337.34	34,641.20
PI(18:1(9Z)/16:1(9Z))	ID_2739	0	98,192.09	-75,474.82
PC(18:0/22:5(7Z,10Z,13Z,16Z,19Z))	ID_2744	0	164,381.93	105,846.48
PC(20:1(11Z)/20:4(5Z,8Z,11Z,14Z))	ID_2751	0	51,971.22	-33,288.66
PC(20:3(8Z,11Z,14Z)/20:2(11Z,14Z))	ID_2756	0	2,120,683.21	243,991.93
PC(20:5(5Z,8Z,11Z,14Z,17Z)/20:0)	ID_2759	0	4,685,763.55	2,123,543.55
PI(16:0/18:1(11Z))	ID_2768	0	897,332.71	328,012.56
PC(18:0/22:4(7Z,10Z,13Z,16Z))	ID_2774	0	99,988.11	71,751.78
PC(20:0/20:4(8Z,11Z,14Z,17Z))	ID_2780	0	1,056,153.99	470,097.28
PC(20:4(5Z,8Z,11Z,14Z)/20:0)	ID_2785	0	276,943.37	-192,643.43
PC(20:4(8Z,11Z,14Z,17Z)/20:0)	ID_2786	0	470,536.55	99,733.90
PC(18:1(11Z)/22:2(13Z,16Z))	ID_2795	0	2,273,557.86	1,550,319.49
PC(20:0/20:3(8Z,11Z,14Z))	ID_2801	0	99,168.86	21,358.61
PC(20:2(11Z,14Z)/20:1(11Z))	ID_2803	0	64,414.13	-33,442.58
PC(20:3(8Z,11Z,14Z)/20:0)	ID_2805	0	169,593.77	89,764.21
PC(22:0/18:3(9Z,12Z,15Z))	ID_2807	0	183,923.21	77,634.61
PC(22:2(13Z,16Z)/18:1(9Z))	ID_2810	0	1,052,517.44	473,065.46
PC(18:1(11Z)/22:1(13Z))	ID_2814	0	1,835,213.73	644,165.32
PC(22:0/18:2(9Z,12Z))	ID_2820	0	698,058.74	399,645.73
PC(22:1(13Z)/18:1(9Z))	ID_2821	0	2,791,961.38	993,635.79
PC(22:2(13Z,16Z)/18:0)	ID_2822	0	198,321.30	142,954.52
PC(16:1(9Z)/24:0)	ID_2830	0	1,609,469.34	941,230.71
PC(22:0/18:1(11Z))	ID_2836	0	676,393.80	353,866.70
PC(24:1(15Z)/16:0)	ID_2840	0	1,235,447.98	228,894.63
PC(18:0/22:0)	ID_2842	0	2,726,000.83	1,920,875.19
LACTO-N-FUCOPENTAOSE III	ID_2848	0	1,896,190.56	902,269.52
PC(24:1(15Z)/P-18:1(11Z))	ID_2852	0	200,251.48	51,435.02
PC(P-18:1(11Z)/24:1(15Z))	ID_2854	0	552,464.90	80,466.11
TG(16:0/16:0/20:4(5Z,8Z,11Z,14Z))	ID_2856	0	112,725.61	40,302.93
TG(16:0/18:2(9Z,12Z)/18:2(9Z,12Z))	ID_2857	0	1,969,320.94	208,334.22
TG(16:1(9Z)/18:1(9Z)/18:2(9Z,12Z))	ID_2858	0	75,743.15	20,052.23
PC(24:0/P-18:1(11Z))	ID_2859	0	331,351.59	78,211.64
PC(24:0/P-18:1(9Z))	ID_2860	0	147,871.28	-22,709.00
PC(P-18:1(9Z)/24:0)	ID_2864	0	1,150,236.70	453,695.71
PI(18:1(9Z)/18:3(9Z,12Z,15Z))	ID_2876	0	595,570.36	36,415.22
PI(18:3(6Z,9Z,12Z)/18:1(9Z))	ID_2878	0	130,183.04	-37,389.64
TG(16:1(9Z)/18:0/18:1(9Z))	ID_2888	0	144,144.75	1,133.18
TG(16:1(9Z)/16:1(9Z)/20:0)	ID_2889	0	2,568,846.28	715,009.78
PI(16:0/20:3(8Z,11Z,14Z))	ID_2891	0	513,028.98	268,033.51
PI(18:1(11Z)/18:2(9Z,12Z))	ID_2894	0	2,168,169.30	245,395.75
TG(16:1(9Z)/18:0/18:0)	ID_2905	0	1,060,345.29	545,215.60
LACCER(D18:1/16:0)	ID_2906	0	95,715.77	953.23
PC(20:1(11Z)/22:5(4Z,7Z,10Z,13Z,16Z))	ID_2908	0	2,982,862.00	934,533.70
PC(20:4(5Z,8Z,11Z,14Z)/22:2(13Z,16Z))	ID_2911	0	439,170.82	308,289.00
PC(22:2(13Z,16Z)/20:4(5Z,8Z,11Z,14Z))	ID_2915	0	2,174,651.28	1,036,270.33
PC(22:2(13Z,16Z)/20:4(8Z,11Z,14Z,17Z))	ID_2916	0	3,461,611.99	2,277,614.50
PC(22:4(7Z,10Z,13Z,16Z)/20:2(11Z,14Z))	ID_2917	0	3,551,265.97	987,008.19
PC(22:5(4Z,7Z,10Z,13Z,16Z)/20:1(11Z))	ID_2918	0	230,177.35	94,855.15
PI(18:0/18:2(9Z,12Z))	ID_2922	0	107,767.70	53,152.47
PI(18:1(9Z)/18:1(9Z))	ID_2926	0	1,920,102.17	510,672.12
PI(20:2(11Z,14Z)/16:0)	ID_2928	0	753,691.73	527,767.25
PC(20:3(5Z,8Z,11Z)/22:2(13Z,16Z))	ID_2934	0	1,528,397.08	666,045.18
PC(20:5(5Z,8Z,11Z,14Z,17Z)/22:0)	ID_2938	0	765,241.68	254,519.31
PC(22:1(13Z)/20:4(8Z,11Z,14Z,17Z))	ID_2941	0	132,967.86	20,319.29
PC(22:4(7Z,10Z,13Z,16Z)/20:1(11Z))	ID_2944	0	4,414,427.08	3,094,179.11
PC(22:5(4Z,7Z,10Z,13Z,16Z)/20:0)	ID_2945	0	1,067,964.29	751,201.76
PC(22:5(7Z,10Z,13Z,16Z,19Z)/20:0)	ID_2946	0	196,081.72	77,683.46
PC(20:2(11Z,14Z)/22:2(13Z,16Z))	ID_2952	0	1,333,231.39	873,974.20
PC(20:4(5Z,8Z,11Z,14Z)/22:0)	ID_2955	0	2,484,015.90	701,282.60
PC(22:1(13Z)/20:3(5Z,8Z,11Z))	ID_2959	0	1,044,571.62	214,204.96
PI(18:0/18:0)	ID_2967	0	676,490.59	44,284.37
PC(20:1(11Z)/22:1(13Z))	ID_2973	0	4,078,328.51	1,927,383.08
PC(22:0/20:2(11Z,14Z))	ID_2975	0	391,650.52	189,232.50
PC(24:1(15Z)/18:1(11Z))	ID_2979	0	988,296.87	308,943.45
PC(18:0/24:0)	ID_2991	0	2,321,497.59	864,994.28
PC(24:0/18:0)	ID_2994	0	758,603.66	339,104.66
TG(18:0/18:2(9Z,12Z)/18:2(9Z,12Z))	ID_3003	0	823,512.02	139,186.03
TG(18:1(9Z)/18:1(9Z)/18:2(9Z,12Z))	ID_3005	0	1,225,162.54	-843,920.16
PI(18:1(11Z)/20:4(8Z,11Z,14Z,17Z))	ID_3010	0	348,512.32	144,008.49
PI(18:2(9Z,12Z)/20:3(5Z,8Z,11Z))	ID_3012	0	417,078.71	-322,385.37
PI(20:3(8Z,11Z,14Z)/18:2(9Z,12Z))	ID_3015	0	1,107,358.88	123,263.76
TG(16:1(9Z)/18:1(9Z)/20:1(11Z))	ID_3026	0	50,561.30	-37,638.42
PI(18:1(11Z)/20:3(5Z,8Z,11Z))	ID_3032	0	6,791,732.88	4,549,737.90
PI(18:2(9Z,12Z)/20:2(11Z,14Z))	ID_3036	0	4,794,002.28	1,686,636.31
PI(20:2(11Z,14Z)/18:2(9Z,12Z))	ID_3037	0	2,817,882.27	599,571.36
PI(18:0/20:4(5Z,8Z,11Z,14Z))	ID_3046	0	761,227.76	-577,924.83
TG(16:0/18:2(9Z,12Z)/20:0)	ID_3048	0	3,661,179.86	2,404,151.28
TG(18:0/18:1(9Z)/18:1(9Z))	ID_3050	0	3,705,031.55	2,431,934.83
TG(16:1(9Z)/18:0/20:1(11Z))	ID_3051	0	2,513,410.57	1,403,485.26
PI(18:0/20:3(5Z,8Z,11Z))	ID_3055	0	265,182.47	189,660.23
PI(20:1(11Z)/18:2(9Z,12Z))	ID_3058	0	794,367.11	578,678.55
PI(20:3(8Z,11Z,14Z)/18:0)	ID_3060	0	683,754.48	291,286.63
PI(18:1(9Z)/20:1(11Z))	ID_3069	0	5,091,039.33	1,590,621.43
PI(20:0/18:2(9Z,12Z))	ID_3071	0	2,160,518.84	1,037,235.77
PI(22:2(13Z,16Z)/16:0)	ID_3075	0	2,335,146.43	1,290,744.55
TG(16:1(9Z)/20:1(11Z)/20:4(5Z,8Z,11Z,14Z))	ID_3080	0	4,248,982.71	1,217,212.40
PI(20:3(5Z,8Z,11Z)/20:3(5Z,8Z,11Z))	ID_3085	0	4,825,636.08	1,143,280.06
PI(20:3(8Z,11Z,14Z)/20:3(5Z,8Z,11Z))	ID_3087	0	3,319,650.77	1,475,243.39
PI(22:3(10Z,13Z,16Z)/18:3(6Z,9Z,12Z))	ID_3089	0	909,809.68	481,429.28
PI(22:3(10Z,13Z,16Z)/18:3(9Z,12Z,15Z))	ID_3090	0	974,014.48	-248,594.19
PI(18:0/22:5(4Z,7Z,10Z,13Z,16Z))	ID_3093	0	1,585,629.41	-472,075.78
PI(18:0/22:5(7Z,10Z,13Z,16Z,19Z))	ID_3094	0	142,060.14	26,787.74
PI(20:1(11Z)/20:4(8Z,11Z,14Z,17Z))	ID_3097	0	870,385.31	-212,919.90
PI(20:4(5Z,8Z,11Z,14Z)/20:1(11Z))	ID_3098	0	552,353.01	249,094.67
PI(22:5(7Z,10Z,13Z,16Z,19Z)/18:0)	ID_3102	0	4,901,396.26	1,147,312.38
PIP(16:2(9Z,12Z)/18:0)	ID_3105	0	1,743,573.90	509,111.08
PI(18:0/22:4(7Z,10Z,13Z,16Z))	ID_3107	0	11,633,028.68	6,768,838.44
PI(20:0/20:4(5Z,8Z,11Z,14Z))	ID_3110	0	355,456.63	35,913.17
PI(20:4(8Z,11Z,14Z,17Z)/20:0)	ID_3113	0	1,494,904.79	-1,242,968.69
TG(16:1(9Z)/20:0/20:1(11Z))	ID_3120	0	3,944,710.36	1,123,724.98
TG(18:1(9Z)/18:1(9Z)/20:0)	ID_3121	0	6,164,939.40	1,331,645.79
TG(16:0/20:0/20:1(11Z))	ID_3123	0	2,852,619.01	819,338.10
TG(18:0/18:0/20:1(11Z))	ID_3124	0	12,071,434.68	8,099,968.57
TG(16:1(9Z)/20:0/20:0)	ID_3126	0	349,186.19	28,607.18
TG(18:2(9Z,12Z)/20:1(11Z)/20:1(11Z))	ID_3132	0	2,794,392.48	1,387,726.59
TG(18:2(9Z,12Z)/20:0/20:1(11Z))	ID_3134	0	13,880,195.09	5,012,313.65
TG(18:2(9Z,12Z)/20:0/20:0)	ID_3137	0	12,193,238.89	3,366,757.42
LACCER(D18:1/22:0)	ID_3138	0	2,475,372.71	-713,052.77
TG(20:1(11Z)/20:1(11Z)/20:4(5Z,8Z,11Z,14Z))	ID_3141	0	17,873,883.27	10,381,591.92
TG(20:0/20:0/20:4(5Z,8Z,11Z,14Z))	ID_3145	0	1,814,145.72	184,314.85
TG(20:0/20:0/20:1(11Z))	ID_3150	0	90,083.77	-28,045.78
DIADENOSINE HEXAPHOSPHATE	ID_3156	0	2,591,669.27	-963,500.41
SIALYLLACTO-N-TETRAOSE A	ID_3157	0	2,484,055.23	-509,740.84
SIALYLLACTO-N-TETRAOSE B	ID_3159	0	368,905.02	-16,487.69
TG(22:6(4Z,7Z,10Z,13Z,16Z,19Z)/22:6(4Z,7Z,10Z,13Z,16Z,19Z)/22:6(4Z,7Z,10Z,13Z,16Z,19Z))	ID_3165	0	4,275,971.74	276,872.40
TRIHEXOSYLCERAMIDE (D18:1/16:0)	ID_3166	0	20,010,323.02	12,138,877.29
TRIHEXOSYLCERAMIDE (D18:1/9Z-18:1)	ID_3167	0	6,239,066.45	1,028,270.66
VASOPRESSIN	ID_3169	0	624,350.51	-215,742.43
TRIHEXOSYLCERAMIDE (D18:1/22:0)	ID_3174	0	2,024,549.28	244,553.16
TRIHEXOSYLCERAMIDE (D18:1/24:1(15Z))	ID_3175	0	13,072,343.85	5,323,342.96
ANIDULAFUNGIN	ID_3178	0	17,352,680.99	11,138,968.43
TRIHEXOSYLCERAMIDE (D18:1/25:0)	ID_3179	0	4,312,254.14	-2,432,443.21
LACTO-N-FUCOHEPTAOSE	ID_3186	0	13,290,682.37	4,835,316.04
GANGLIOSIDE GM3 (D18:1/24:1(15Z))	ID_3187	0	8,063,628.65	5,168,363.32
GOSERELIN	ID_3188	0	3,037,792.83	739,042.86
DISIALYLLACTO-N-TETRAOSE	ID_3189	0	5,471,591.13	124,921.67
HEPTAGLUTAMYL FOLIC ACID	ID_3195	0	17,853,771.09	8,963,148.84
CERULETIDE	ID_3197	0	12,563,220.03	4,831,341.91
DOLICHOL-20	ID_3201	0	1,330,647.43	-553,394.53
CL(I-14:0/I-17:0/I-17:0/I-20:0)	ID_3202	0	14,071,741.50	5,026,098.20
CETRORELIX	ID_3204	0	9,740,043.55	3,031,167.27
GANGLIOSIDE GD3 (D18:1/16:0)	ID_3205	0	17,136,482.63	8,899,099.33
GANGLIOSIDE GM2 (D18:1/26:0)	ID_3208	0	6,167,094.30	-1,505,564.10
FONDAPARINUX SODIUM	ID_3209	0	45,131,853.80	15,517,606.40
GANGLIOSIDE GD2 (D18:1/24:0)	ID_3210	0	32,531,646.50	10,346,351.40
