# Supplementary material for: Flos Carthami Exerts Hepatoprotective Action in a Rat Model of Alcoholic Liver Injury via Modulating the Metabolomics Profile
Source: Evid Based Complement Alternat Med. 2022 May 2;2022:8158699. doi: 10.1155/2022/8158699 (PMC9085312; doi:10.1155/2022/8158699)
Supplement: Supplementary Materials — Additional Figure S1. Enrichment analysis of metabolites differentially expressed between the CG and MG. Additional Figure S2. Enrichment analysis of metabolites differentially expressed between the FC and MG. Additional Figure S3. Metabolite interaction network of FC-responsive metabolites in alcoholic liver injury. Additional File S1. List of ingredients in FC as reported in TCMSP. Additional File S2. List of metabolites differentially expressed between the CG and MG. Additional File S3. List of metabolites differentially expressed between the FC and MG. Additional File S4. List of FC-responsive metabolites in alcoholic liver injury. Additional File S5. Pearson correlation of FC-responsive metabolites in alcoholic liver injury. [file 8158699.f1.zip › 8158699.f1/Additional File S5.txt]

Var1	Var2	r value
PHENYLGLYOXYLIC ACID	1-METHYLADENINE	0.945014597
GUANIDINOSUCCINIC ACID	1-METHYLADENINE	0.897093656
(R)-SALSOLINOL	1-METHYLADENINE	0.94621631
N1-ACETYLSPERMIDINE	1-METHYLADENINE	0.91321843
5-KETO-D-GLUCONATE	1-METHYLADENINE	0.828875791
4-AMINOHIPPURIC ACID	1-METHYLADENINE	0.85704384
(S)-LIPOIC ACID	1-METHYLADENINE	0.827451204
5-NONENOYLGLYCINE	1-METHYLADENINE	0.85513915
8-NONENOYLGLYCINE	1-METHYLADENINE	0.863284458
4-ALLYLPHENOL SULFATE	1-METHYLADENINE	0.814860729
1-HYDROXYOCT-3-ENOYLGLYCINE	1-METHYLADENINE	0.865695468
2-HYDROXYOCT-2-ENOYLGLYCINE	1-METHYLADENINE	0.839072313
6-HYDROXYOCT-1-ENOYLGLYCINE	1-METHYLADENINE	0.915496626
P-CHLOROBENZENE SULFONYL UREA	1-METHYLADENINE	0.827514016
EQUOL	1-METHYLADENINE	0.924562608
2-HYDROXYMYRISTIC ACID	1-METHYLADENINE	0.818637589
1,2-BENZENEDIOL BIS(TRIMETHYLSILYL) ETHER	1-METHYLADENINE	0.869233043
NICOTINIC ACID RIBONUCLEOSIDE	1-METHYLADENINE	0.860387293
FRUCTOSE 6-PHOSPHATE	1-METHYLADENINE	0.803846011
AMITRIPTYLINE	1-METHYLADENINE	0.905180884
13-CIS RETINOL	1-METHYLADENINE	0.889549853
BRIMONIDINE	1-METHYLADENINE	0.860134785
FAMCICLOVIR	1-METHYLADENINE	0.873830351
PROSTAGLANDIN F1A	1-METHYLADENINE	0.890536961
RANOLAZINE	1-METHYLADENINE	0.859020399
MASLINIC ACID	1-METHYLADENINE	0.813783285
DG(14:1(9Z)/16:1(9Z)/0:0)	1-METHYLADENINE	0.832607703
DG(16:0/18:1(11Z)/0:0)	1-METHYLADENINE	0.815664572
CER(D18:0/23:0)	1-METHYLADENINE	0.824159624
DG(20:3(5Z,8Z,11Z)/18:2(9Z,12Z)/0:0)	1-METHYLADENINE	0.817638518
DG(20:2(11Z,14Z)/20:2(11Z,14Z)/0:0)	1-METHYLADENINE	0.835252376
PC(P-16:0/16:1(9Z))	1-METHYLADENINE	0.811113471
PC(P-18:1(11Z)/16:1(9Z))	1-METHYLADENINE	0.842229027
PE(20:0/16:1(9Z))	1-METHYLADENINE	0.849093287
PG(18:1(9Z)/16:0)	1-METHYLADENINE	0.801592541
PC(14:1(9Z)/20:3(8Z,11Z,14Z))	1-METHYLADENINE	0.831699236
PC(20:2(11Z,14Z)/14:0)	1-METHYLADENINE	0.82852564
PC(14:1(9Z)/22:2(13Z,16Z))	1-METHYLADENINE	0.824852418
PG(18:2(9Z,12Z)/20:3(5Z,8Z,11Z))	1-METHYLADENINE	0.854160142
PC(20:4(5Z,8Z,11Z,14Z)/18:1(9Z))	1-METHYLADENINE	0.850667822
PC(20:5(5Z,8Z,11Z,14Z,17Z)/18:0)	1-METHYLADENINE	0.927140603
PC(20:3(8Z,11Z,14Z)/20:2(11Z,14Z))	1-METHYLADENINE	0.868353359
PI(18:2(9Z,12Z)/20:2(11Z,14Z))	1-METHYLADENINE	0.864377623
PI(20:3(8Z,11Z,14Z)/20:3(5Z,8Z,11Z))	1-METHYLADENINE	0.812393973
TG(18:2(9Z,12Z)/20:0/20:1(11Z))	1-METHYLADENINE	0.852252655
LACTO-N-FUCOHEPTAOSE	1-METHYLADENINE	0.837523909
DEBRISOQUINE	3-METHYLADENINE	0.938555567
CYSTEINYLGLYCINE	3-METHYLADENINE	0.907839912
ALLO-INOSITOL	3-METHYLADENINE	0.938092427
1-HYDROXYHEXANOYLGLYCINE	3-METHYLADENINE	0.945066807
2,3-OCTADIENOYLGLYCINE	3-METHYLADENINE	0.862191111
(R)-LIPOIC ACID	3-METHYLADENINE	0.942236845
7-HYDROXYOCT-7-ENOYLGLYCINE	3-METHYLADENINE	0.876890301
HEPTYL CYCLOHEXANE CARBOXYLIC ACID	3-METHYLADENINE	0.915462146
TRIMETHYLSILYL NONANOIC ACID	3-METHYLADENINE	0.828941138
ASPARTYLLYSINE	3-METHYLADENINE	0.884998175
SPHINGOSINE	3-METHYLADENINE	0.838810915
WARFARIN	3-METHYLADENINE	0.857015811
REBOXETINE	3-METHYLADENINE	0.912723795
CLOZAPINE	3-METHYLADENINE	0.826423599
6-(3-CARBOXY-2-HYDROXYPHENOXY)-3,4,5-TRIHYDROXYOXANE-2-CARBOXYLIC ACID	3-METHYLADENINE	0.829231239
6-[4-(CARBOXYMETHYL)-2-HYDROXYPHENOXY]-3,4,5-TRIHYDROXYOXANE-2-CARBOXYLIC ACID	3-METHYLADENINE	0.873392281
GREPAFLOXACIN	3-METHYLADENINE	0.872292026
PROPANTHELINE	3-METHYLADENINE	0.865019824
GENTIAN VIOLET	3-METHYLADENINE	0.816641575
DILTIAZEM	3-METHYLADENINE	0.808658819
GAMMA-CAROTENE	3-METHYLADENINE	0.871484844
NEUROSPORENE	3-METHYLADENINE	0.876942965
GADODIAMIDE	3-METHYLADENINE	0.857271669
DG(18:2(9Z,12Z)/18:4(6Z,9Z,12Z,15Z)/0:0)	3-METHYLADENINE	0.834221755
DG(14:1(9Z)/22:1(13Z)/0:0)	3-METHYLADENINE	0.974950987
DG(20:0/18:2(9Z,12Z)/0:0)	3-METHYLADENINE	0.880812919
PC(18:3(9Z,12Z,15Z)/14:1(9Z))	3-METHYLADENINE	0.866098567
PE(16:0/20:2(11Z,14Z))	3-METHYLADENINE	0.874172767
PI(20:3(5Z,8Z,11Z)/20:3(5Z,8Z,11Z))	3-METHYLADENINE	0.881408476
1-METHYLADENINE	PHENYLGLYOXYLIC ACID	0.945014597
GUANIDINOSUCCINIC ACID	PHENYLGLYOXYLIC ACID	0.930471699
(R)-SALSOLINOL	PHENYLGLYOXYLIC ACID	0.992539434
N1-ACETYLSPERMIDINE	PHENYLGLYOXYLIC ACID	0.917580779
4-AMINOHIPPURIC ACID	PHENYLGLYOXYLIC ACID	0.841630985
TETRAETHYLENE GLYCOL	PHENYLGLYOXYLIC ACID	0.827547364
2,4-OCTADIENOYLGLYCINE	PHENYLGLYOXYLIC ACID	0.873139363
(S)-LIPOIC ACID	PHENYLGLYOXYLIC ACID	0.846392601
PHOSPHOCREATINE	PHENYLGLYOXYLIC ACID	0.862483717
5-NONENOYLGLYCINE	PHENYLGLYOXYLIC ACID	0.837635718
8-NONENOYLGLYCINE	PHENYLGLYOXYLIC ACID	0.923808309
4-ALLYLPHENOL SULFATE	PHENYLGLYOXYLIC ACID	0.867998902
1-HYDROXYOCT-3-ENOYLGLYCINE	PHENYLGLYOXYLIC ACID	0.868489089
6-HYDROXYOCT-1-ENOYLGLYCINE	PHENYLGLYOXYLIC ACID	0.896856647
7-HYDROXYOCT-1-ENOYLGLYCINE	PHENYLGLYOXYLIC ACID	0.854611471
P-CHLOROBENZENE SULFONYL UREA	PHENYLGLYOXYLIC ACID	0.824376843
EQUOL	PHENYLGLYOXYLIC ACID	0.912935683
2-HYDROXYMYRISTIC ACID	PHENYLGLYOXYLIC ACID	0.856759092
1,2-BENZENEDIOL BIS(TRIMETHYLSILYL) ETHER	PHENYLGLYOXYLIC ACID	0.908481003
NICOTINIC ACID RIBONUCLEOSIDE	PHENYLGLYOXYLIC ACID	0.896476453
FRUCTOSE 6-PHOSPHATE	PHENYLGLYOXYLIC ACID	0.860765632
EPINEPHRINE SULFATE	PHENYLGLYOXYLIC ACID	0.81417987
BIOTIN SULFONE	PHENYLGLYOXYLIC ACID	0.82622986
AMITRIPTYLINE	PHENYLGLYOXYLIC ACID	0.898858829
13-CIS RETINOL	PHENYLGLYOXYLIC ACID	0.848905395
BRIMONIDINE	PHENYLGLYOXYLIC ACID	0.866036658
FAMCICLOVIR	PHENYLGLYOXYLIC ACID	0.877724442
PROSTAGLANDIN F1A	PHENYLGLYOXYLIC ACID	0.876219165
CINNARIZINE	PHENYLGLYOXYLIC ACID	0.8215585
LYSOPA(0:0/16:0)	PHENYLGLYOXYLIC ACID	0.823482461
RANOLAZINE	PHENYLGLYOXYLIC ACID	0.869618702
BENZTHIAZIDE	PHENYLGLYOXYLIC ACID	0.831198633
DG(14:1(9Z)/16:1(9Z)/0:0)	PHENYLGLYOXYLIC ACID	0.885840375
DG(16:0/18:1(11Z)/0:0)	PHENYLGLYOXYLIC ACID	0.871035606
CER(D18:0/23:0)	PHENYLGLYOXYLIC ACID	0.855386596
DG(20:3(5Z,8Z,11Z)/18:2(9Z,12Z)/0:0)	PHENYLGLYOXYLIC ACID	0.863335289
DG(18:2(9Z,12Z)/20:0/0:0)	PHENYLGLYOXYLIC ACID	0.837296129
DG(20:4(8Z,11Z,14Z,17Z)/20:2(11Z,14Z)/0:0)	PHENYLGLYOXYLIC ACID	0.846378649
DG(20:2(11Z,14Z)/20:2(11Z,14Z)/0:0)	PHENYLGLYOXYLIC ACID	0.841007329
PC(P-16:0/16:1(9Z))	PHENYLGLYOXYLIC ACID	0.826967079
PC(P-18:1(11Z)/16:1(9Z))	PHENYLGLYOXYLIC ACID	0.833065945
PE(20:0/16:1(9Z))	PHENYLGLYOXYLIC ACID	0.901312112
PG(18:2(9Z,12Z)/16:0)	PHENYLGLYOXYLIC ACID	0.83957488
PC(14:1(9Z)/20:3(8Z,11Z,14Z))	PHENYLGLYOXYLIC ACID	0.850593526
PC(20:2(11Z,14Z)/14:0)	PHENYLGLYOXYLIC ACID	0.815130611
PC(20:1(11Z)/P-16:0)	PHENYLGLYOXYLIC ACID	0.816858433
PG(18:2(9Z,12Z)/20:3(5Z,8Z,11Z))	PHENYLGLYOXYLIC ACID	0.918063907
PC(P-18:1(9Z)/20:0)	PHENYLGLYOXYLIC ACID	0.801351291
PC(20:4(5Z,8Z,11Z,14Z)/18:1(9Z))	PHENYLGLYOXYLIC ACID	0.87460069
PC(20:5(5Z,8Z,11Z,14Z,17Z)/18:0)	PHENYLGLYOXYLIC ACID	0.949381576
PC(20:4(8Z,11Z,14Z,17Z)/20:2(11Z,14Z))	PHENYLGLYOXYLIC ACID	0.814295741
PC(20:3(8Z,11Z,14Z)/20:2(11Z,14Z))	PHENYLGLYOXYLIC ACID	0.924998195
TG(16:0/18:2(9Z,12Z)/18:2(9Z,12Z))	PHENYLGLYOXYLIC ACID	0.804316968
PC(20:1(11Z)/22:5(4Z,7Z,10Z,13Z,16Z))	PHENYLGLYOXYLIC ACID	0.801250964
PC(18:0/24:0)	PHENYLGLYOXYLIC ACID	0.809124288
PI(18:2(9Z,12Z)/20:2(11Z,14Z))	PHENYLGLYOXYLIC ACID	0.85961827
PI(20:3(8Z,11Z,14Z)/20:3(5Z,8Z,11Z))	PHENYLGLYOXYLIC ACID	0.836885371
TG(18:2(9Z,12Z)/20:0/20:1(11Z))	PHENYLGLYOXYLIC ACID	0.855641967
1,1-DIMETHYLETHYL HEPTANOIC ACID	D-XYLULOSE	0.838097631
2-HYDROXYDECANOATE	D-XYLULOSE	0.81650029
CYSTATHIONINE KETIMINE	D-XYLULOSE	0.95202849
N-PROPIONYLMETHIONINE	D-XYLULOSE	0.930751286
PRAMIPEXOLE	D-XYLULOSE	0.948155257
FORMONONETIN	D-XYLULOSE	0.930066724
N-PHENYLACETYLPHENYLALANINE	D-XYLULOSE	0.813454613
N-ACETYLNEURAMINIC ACID	D-XYLULOSE	0.879480195
OLEOYLETHANOLAMIDE	D-XYLULOSE	0.867490581
MG(16:0/0:0/0:0)	D-XYLULOSE	0.958756349
DODECANOYLCARNITINE	D-XYLULOSE	0.950423493
DG(18:2(9Z,12Z)/20:3(5Z,8Z,11Z)/0:0)	D-XYLULOSE	0.854273268
PA(16:0/18:1(11Z))	D-XYLULOSE	0.889318636
PE(16:0/20:1(11Z))	D-XYLULOSE	0.943280911
VINDESINE	D-XYLULOSE	0.954112849
PC(P-18:1(9Z)/18:4(6Z,9Z,12Z,15Z))	D-XYLULOSE	0.944755291
PC(22:4(7Z,10Z,13Z,16Z)/14:0)	D-XYLULOSE	0.80720081
PC(18:1(11Z)/18:1(9Z))	D-XYLULOSE	0.954974199
PE(22:4(7Z,10Z,13Z,16Z)/18:1(9Z))	D-XYLULOSE	0.812169572
BACLOFEN	3-INDOLEACETONITRILE	0.8636662
4A-CARBINOLAMINE TETRAHYDROBIOPTERIN	3-INDOLEACETONITRILE	0.800739172
N-ACETYLVALINE	4-HYDROXYNONENAL	0.804993677
13-CIS RETINOL	4-HYDROXYNONENAL	0.810729856
MASLINIC ACID	4-HYDROXYNONENAL	0.805812213
PHYTOENE	4-HYDROXYNONENAL	0.838651899
DG(18:1(11Z)/20:4(5Z,8Z,11Z,14Z)/0:0)	4-HYDROXYNONENAL	0.81656108
DG(20:2(11Z,14Z)/18:1(11Z)/0:0)	4-HYDROXYNONENAL	0.802325183
PC(20:2(11Z,14Z)/14:0)	4-HYDROXYNONENAL	0.823540971
PC(22:0/16:1(9Z))	4-HYDROXYNONENAL	0.828651944
PC(20:3(5Z,8Z,11Z)/22:2(13Z,16Z))	4-HYDROXYNONENAL	0.835178925
LACTO-N-FUCOHEPTAOSE	4-HYDROXYNONENAL	0.808327207
4-HYDROXYNONENAL	N-ACETYLVALINE	0.804993677
L-FUCOSE	N-ACETYLVALINE	0.838715505
PROPYLTHIOURACIL	N-ACETYLVALINE	0.87169997
MONOMETHYL PHTHALATE	N-ACETYLVALINE	0.826787488
CARBIMAZOLE	N-ACETYLVALINE	0.857055331
1-[2-METHYL-3-(METHYLTHIO) ALLYL]CYCLOHEX-2-ENOL	N-ACETYLVALINE	0.846147971
ASYMMETRIC DIMETHYLARGININE	N-ACETYLVALINE	0.917405459
5-HYDROXYOCT-5-ENOYLGLYCINE	N-ACETYLVALINE	0.81277887
5-HYDROXYPHENYLPROPIONYLGLYCINE	N-ACETYLVALINE	0.865645368
DOPAMINE 4-SULFATE	N-ACETYLVALINE	0.807798309
BIOTIN SULFONE	N-ACETYLVALINE	0.837244468
25-HYDROXYCHOLESTEROL	N-ACETYLVALINE	0.895280605
TOREMIFENE	N-ACETYLVALINE	0.865166955
PC(14:1(9Z)/20:3(8Z,11Z,14Z))	N-ACETYLVALINE	0.855258345
PC(20:2(11Z,14Z)/14:0)	N-ACETYLVALINE	0.844596113
PC(20:3(8Z,11Z,14Z)/18:0)	N-ACETYLVALINE	0.802065128
PC(20:3(5Z,8Z,11Z)/22:2(13Z,16Z))	N-ACETYLVALINE	0.85331765
PC(22:5(4Z,7Z,10Z,13Z,16Z)/20:0)	N-ACETYLVALINE	0.812718901
PI(18:2(9Z,12Z)/20:2(11Z,14Z))	N-ACETYLVALINE	0.860821508
LACTO-N-FUCOHEPTAOSE	N-ACETYLVALINE	0.825923312
8-HYDROXYGUANINE	(R)-2-HYDROXYCAPRYLIC ACID	0.998009211
L-3-HYDROXYKYNURENINE	(R)-2-HYDROXYCAPRYLIC ACID	0.850924295
DEXRAZOXANE	(R)-2-HYDROXYCAPRYLIC ACID	0.889568131
PHENYLEPHRINE	S-(2-CARBOXYPROPYL)-CYSTEAMINE	0.882640214
ASCORBIC ACID	S-(2-CARBOXYPROPYL)-CYSTEAMINE	0.938884025
MYO-INOSITOL	S-(2-CARBOXYPROPYL)-CYSTEAMINE	0.859258825
N-ACETYLGLUTAMINE	S-(2-CARBOXYPROPYL)-CYSTEAMINE	0.867394201
D-THREO-ISOCITRIC ACID	S-(2-CARBOXYPROPYL)-CYSTEAMINE	0.950928281
GOLD	S-(2-CARBOXYPROPYL)-CYSTEAMINE	0.902103277
CLAVULANATE	S-(2-CARBOXYPROPYL)-CYSTEAMINE	0.880740783
GAMMA-GLUTAMYLGLYCINE	S-(2-CARBOXYPROPYL)-CYSTEAMINE	0.803833156
ETHAMBUTOL	S-(2-CARBOXYPROPYL)-CYSTEAMINE	0.88828802
4-NONENOYLGLYCINE	S-(2-CARBOXYPROPYL)-CYSTEAMINE	0.880065346
METHYL BISNORBIOTINYL KETONE	S-(2-CARBOXYPROPYL)-CYSTEAMINE	0.832735603
2-HYDROXYOCT-1-ENOYLGLYCINE	S-(2-CARBOXYPROPYL)-CYSTEAMINE	0.850326019
MIGLUSTAT	S-(2-CARBOXYPROPYL)-CYSTEAMINE	0.904883877
N-ACETYLGALACTOSAMINE	S-(2-CARBOXYPROPYL)-CYSTEAMINE	0.902240017
3-HYDROXYPHENYLPROPIONYLGLYCINE	S-(2-CARBOXYPROPYL)-CYSTEAMINE	0.865181206
ACETYL-N-FORMYL-5-METHOXYKYNURENAMINE	S-(2-CARBOXYPROPYL)-CYSTEAMINE	0.884946451
CIS-VACCENIC ACID	S-(2-CARBOXYPROPYL)-CYSTEAMINE	0.842358963
4-HYDROXY TOLBUTAMIDE	S-(2-CARBOXYPROPYL)-CYSTEAMINE	0.912306976
SUCCINYLCHOLINE	S-(2-CARBOXYPROPYL)-CYSTEAMINE	0.842233784
9-CIS-RETINOIC ACID	S-(2-CARBOXYPROPYL)-CYSTEAMINE	0.856952083
N,O-BIS- (TRIMETHYLSILYL)PHENYLALANINE	S-(2-CARBOXYPROPYL)-CYSTEAMINE	0.913661225
DESOGESTREL	S-(2-CARBOXYPROPYL)-CYSTEAMINE	0.842951707
6-(3-CARBOXYPHENOXY)-3,4,5-TRIHYDROXYOXANE-2-CARBOXYLIC ACID	S-(2-CARBOXYPROPYL)-CYSTEAMINE	0.826932473
OXYCODONE	S-(2-CARBOXYPROPYL)-CYSTEAMINE	0.882757923
DOLASETRON	S-(2-CARBOXYPROPYL)-CYSTEAMINE	0.914463796
FUROSEMIDE	S-(2-CARBOXYPROPYL)-CYSTEAMINE	0.908253079
CIPROFLOXACIN	S-(2-CARBOXYPROPYL)-CYSTEAMINE	0.805636432
GLYCEROPHOSPHOINOSITOL	S-(2-CARBOXYPROPYL)-CYSTEAMINE	0.923631666
NICOTINAMIDE RIBOTIDE	S-(2-CARBOXYPROPYL)-CYSTEAMINE	0.883893756
6-TRANS-12-EPI-LEUKOTRIENE B4	S-(2-CARBOXYPROPYL)-CYSTEAMINE	0.896932594
TENOXICAM	S-(2-CARBOXYPROPYL)-CYSTEAMINE	0.891823835
R-138727	S-(2-CARBOXYPROPYL)-CYSTEAMINE	0.858040976
HALAZEPAM	S-(2-CARBOXYPROPYL)-CYSTEAMINE	0.888450487
MG(0:0/18:3(6Z,9Z,12Z)/0:0)	S-(2-CARBOXYPROPYL)-CYSTEAMINE	0.86256798
8-ISOPROSTAGLANDIN F2A	S-(2-CARBOXYPROPYL)-CYSTEAMINE	0.932619754
6,15-DIKETO,13,14-DIHYDRO-PGF1A	S-(2-CARBOXYPROPYL)-CYSTEAMINE	0.866510582
BORTEZOMIB	S-(2-CARBOXYPROPYL)-CYSTEAMINE	0.863090269
LYSOPA(P-16:0/0:0)	S-(2-CARBOXYPROPYL)-CYSTEAMINE	0.811396857
ALCLOMETASONE	S-(2-CARBOXYPROPYL)-CYSTEAMINE	0.846600778
BETA-TOCOPHEROL	S-(2-CARBOXYPROPYL)-CYSTEAMINE	0.901048615
ALPHA-TOCOTRIENOL	S-(2-CARBOXYPROPYL)-CYSTEAMINE	0.881049401
DICLOXACILLIN	S-(2-CARBOXYPROPYL)-CYSTEAMINE	0.932355552
CEFMETAZOLE	S-(2-CARBOXYPROPYL)-CYSTEAMINE	0.830555018
DG(16:1(9Z)/14:1(9Z)/0:0)	S-(2-CARBOXYPROPYL)-CYSTEAMINE	0.909798405
2',3'-ANHYDROLUTEIN	S-(2-CARBOXYPROPYL)-CYSTEAMINE	0.9028599
DG(14:1(9Z)/18:2(9Z,12Z)/0:0)	S-(2-CARBOXYPROPYL)-CYSTEAMINE	0.864732016
DG(14:0/18:1(9Z)/0:0)	S-(2-CARBOXYPROPYL)-CYSTEAMINE	0.812414244
DG(18:1(11Z)/14:0/0:0)	S-(2-CARBOXYPROPYL)-CYSTEAMINE	0.818724403
DG(14:0/18:0/0:0)	S-(2-CARBOXYPROPYL)-CYSTEAMINE	0.814094413
DG(18:3(6Z,9Z,12Z)/16:1(9Z)/0:0)	S-(2-CARBOXYPROPYL)-CYSTEAMINE	0.927336072
DG(20:4(5Z,8Z,11Z,14Z)/14:0/0:0)	S-(2-CARBOXYPROPYL)-CYSTEAMINE	0.848362434
UROBILINOGEN	S-(2-CARBOXYPROPYL)-CYSTEAMINE	0.825413459
DG(20:2(11Z,14Z)/14:1(9Z)/0:0)	S-(2-CARBOXYPROPYL)-CYSTEAMINE	0.892934192
DG(18:1(11Z)/16:1(9Z)/0:0)	S-(2-CARBOXYPROPYL)-CYSTEAMINE	0.875900751
DG(14:1(9Z)/20:0/0:0)	S-(2-CARBOXYPROPYL)-CYSTEAMINE	0.897293854
ASTAXANTHIN	S-(2-CARBOXYPROPYL)-CYSTEAMINE	0.917670935
DG(20:3(8Z,11Z,14Z)/16:0/0:0)	S-(2-CARBOXYPROPYL)-CYSTEAMINE	0.90331471
DG(18:4(6Z,9Z,12Z,15Z)/20:2(11Z,14Z)/0:0)	S-(2-CARBOXYPROPYL)-CYSTEAMINE	0.863967074
DG(20:1(11Z)/18:0/0:0)	S-(2-CARBOXYPROPYL)-CYSTEAMINE	0.85280933
CER(D18:1/25:0)	S-(2-CARBOXYPROPYL)-CYSTEAMINE	0.838868209
DG(18:3(9Z,12Z,15Z)/22:4(7Z,10Z,13Z,16Z)/0:0)	S-(2-CARBOXYPROPYL)-CYSTEAMINE	0.906774046
PE(P-16:0/18:2(9Z,12Z))	S-(2-CARBOXYPROPYL)-CYSTEAMINE	0.851884081
PC(P-18:1(11Z)/14:0)	S-(2-CARBOXYPROPYL)-CYSTEAMINE	0.812491298
PC(P-16:0/P-18:1(11Z))	S-(2-CARBOXYPROPYL)-CYSTEAMINE	0.894317521
PE(P-18:0/18:1(9Z))	S-(2-CARBOXYPROPYL)-CYSTEAMINE	0.927677786
PC(18:1(9Z)/14:0)	S-(2-CARBOXYPROPYL)-CYSTEAMINE	0.856201329
PC(P-18:1(9Z)/16:0)	S-(2-CARBOXYPROPYL)-CYSTEAMINE	0.887834594
GLCCER(D18:1/20:0)	S-(2-CARBOXYPROPYL)-CYSTEAMINE	0.812653101
PC(16:0/18:1(9Z))	S-(2-CARBOXYPROPYL)-CYSTEAMINE	0.801474922
PC(18:1(9Z)/16:0)	S-(2-CARBOXYPROPYL)-CYSTEAMINE	0.800309999
PC(P-18:1(9Z)/18:3(9Z,12Z,15Z))	S-(2-CARBOXYPROPYL)-CYSTEAMINE	0.80525945
PENTAGASTRIN	S-(2-CARBOXYPROPYL)-CYSTEAMINE	0.839638466
PE(14:1(9Z)/24:1(15Z))	S-(2-CARBOXYPROPYL)-CYSTEAMINE	0.890446709
PG(18:0/18:1(9Z))	S-(2-CARBOXYPROPYL)-CYSTEAMINE	0.912787461
PC(18:3(6Z,9Z,12Z)/18:3(9Z,12Z,15Z))	S-(2-CARBOXYPROPYL)-CYSTEAMINE	0.829297515
SM(D16:1/24:1(15Z))	S-(2-CARBOXYPROPYL)-CYSTEAMINE	0.863355622
PE(22:0/18:4(6Z,9Z,12Z,15Z))	S-(2-CARBOXYPROPYL)-CYSTEAMINE	0.866524189
PC(18:2(9Z,12Z)/20:4(5Z,8Z,11Z,14Z))	S-(2-CARBOXYPROPYL)-CYSTEAMINE	0.873902743
PC(20:1(11Z)/18:4(6Z,9Z,12Z,15Z))	S-(2-CARBOXYPROPYL)-CYSTEAMINE	0.861610926
PC(22:0/P-18:1(11Z))	S-(2-CARBOXYPROPYL)-CYSTEAMINE	0.843238859
TG(16:0/16:1(9Z)/18:2(9Z,12Z))	S-(2-CARBOXYPROPYL)-CYSTEAMINE	0.842139957
PC(20:5(5Z,8Z,11Z,14Z,17Z)/20:0)	S-(2-CARBOXYPROPYL)-CYSTEAMINE	0.82839511
PC(20:0/20:4(8Z,11Z,14Z,17Z))	S-(2-CARBOXYPROPYL)-CYSTEAMINE	0.90307145
PC(18:1(11Z)/22:1(13Z))	S-(2-CARBOXYPROPYL)-CYSTEAMINE	0.812547781
PC(22:1(13Z)/18:1(9Z))	S-(2-CARBOXYPROPYL)-CYSTEAMINE	0.891875355
PC(24:1(15Z)/16:0)	S-(2-CARBOXYPROPYL)-CYSTEAMINE	0.894966244
PC(P-18:1(9Z)/24:0)	S-(2-CARBOXYPROPYL)-CYSTEAMINE	0.800282314
TG(16:1(9Z)/16:1(9Z)/20:0)	S-(2-CARBOXYPROPYL)-CYSTEAMINE	0.898803253
PC(22:2(13Z,16Z)/20:4(5Z,8Z,11Z,14Z))	S-(2-CARBOXYPROPYL)-CYSTEAMINE	0.895290085
PC(20:4(5Z,8Z,11Z,14Z)/22:0)	S-(2-CARBOXYPROPYL)-CYSTEAMINE	0.907947731
PC(20:1(11Z)/22:1(13Z))	S-(2-CARBOXYPROPYL)-CYSTEAMINE	0.815079039
PI(20:2(11Z,14Z)/18:2(9Z,12Z))	S-(2-CARBOXYPROPYL)-CYSTEAMINE	0.871905485
TG(18:1(9Z)/18:1(9Z)/20:0)	S-(2-CARBOXYPROPYL)-CYSTEAMINE	0.871514338
TG(18:2(9Z,12Z)/20:0/20:0)	S-(2-CARBOXYPROPYL)-CYSTEAMINE	0.864845788
HEPTAGLUTAMYL FOLIC ACID	S-(2-CARBOXYPROPYL)-CYSTEAMINE	0.906006985
CINNAMOYLGLYCINE	4-HYDROXYCINNAMIC ACID	0.82346358
N-ACETYLVALINE	L-FUCOSE	0.838715505
MEXILETINE	L-FUCOSE	0.841020267
MONOMETHYL PHTHALATE	L-FUCOSE	0.925020758
CARBIMAZOLE	L-FUCOSE	0.935065689
ASYMMETRIC DIMETHYLARGININE	L-FUCOSE	0.886179211
5-HYDROXYPHENYLPROPIONYLGLYCINE	L-FUCOSE	0.933633969
NABUMETONE	L-FUCOSE	0.89321553
DOPAMINE 4-SULFATE	L-FUCOSE	0.947258611
BIOTIN SULFONE	L-FUCOSE	0.834619869
PENTAMIDINE	L-FUCOSE	0.812165392
TOREMIFENE	L-FUCOSE	0.803937987
5-METHYLTETRAHYDROFOLIC ACID	L-FUCOSE	0.803820842
GUANOSINE TRIPHOSPHATE	L-FUCOSE	0.849598373
PA(18:1(11Z)/18:1(11Z))	L-FUCOSE	0.858709374
PC(14:1(9Z)/20:3(8Z,11Z,14Z))	L-FUCOSE	0.813591515
GLUCOSAMINE	1,5-ANHYDROSORBITOL	0.895945158
1,1-DIMETHYLETHYL HEPTANOIC ACID	1,5-ANHYDROSORBITOL	0.958509768
2-HYDROXYDECANOATE	1,5-ANHYDROSORBITOL	0.909208818
N-PROPIONYLMETHIONINE	1,5-ANHYDROSORBITOL	0.824252048
PRAMIPEXOLE	1,5-ANHYDROSORBITOL	0.802394632
ISOLEUCYLPROLINE	1,5-ANHYDROSORBITOL	0.984701042
MELATONIN	1,5-ANHYDROSORBITOL	0.941267721
SULFAMETHIZOLE	1,5-ANHYDROSORBITOL	0.947806069
4-HYDROXYESTRONE	1,5-ANHYDROSORBITOL	0.907465851
ETODOLAC	1,5-ANHYDROSORBITOL	0.908693988
N-ACETYLNEURAMINIC ACID	1,5-ANHYDROSORBITOL	0.843899025
18-HYDROXYARACHIDONIC ACID	1,5-ANHYDROSORBITOL	0.880290571
OLEOYLETHANOLAMIDE	1,5-ANHYDROSORBITOL	0.897162476
DODECANOYLCARNITINE	1,5-ANHYDROSORBITOL	0.814436112
OMEPRAZOLE	1,5-ANHYDROSORBITOL	0.878598709
13,14-DIHYDRO-15-KETO PGF2A	1,5-ANHYDROSORBITOL	0.882710857
LYSOPE(15:0/0:0)	1,5-ANHYDROSORBITOL	0.858663835
ZEAXANTHIN	1,5-ANHYDROSORBITOL	0.885636496
PC(15:0/15:0)	1,5-ANHYDROSORBITOL	0.930852512
PE(16:0/20:1(11Z))	1,5-ANHYDROSORBITOL	0.802276936
PG(18:2(9Z,12Z)/18:3(9Z,12Z,15Z))	1,5-ANHYDROSORBITOL	0.906062606
PC(22:4(7Z,10Z,13Z,16Z)/14:0)	1,5-ANHYDROSORBITOL	0.827527469
PE(22:4(7Z,10Z,13Z,16Z)/18:1(9Z))	1,5-ANHYDROSORBITOL	0.8236276
PC(P-18:1(9Z)/22:4(7Z,10Z,13Z,16Z))	1,5-ANHYDROSORBITOL	0.804581589
PC(18:1(11Z)/22:2(13Z,16Z))	1,5-ANHYDROSORBITOL	0.911454556
PC(22:2(13Z,16Z)/20:4(8Z,11Z,14Z,17Z))	1,5-ANHYDROSORBITOL	0.915740058
PC(22:4(7Z,10Z,13Z,16Z)/20:1(11Z))	1,5-ANHYDROSORBITOL	0.914628324
PI(18:1(11Z)/20:3(5Z,8Z,11Z))	1,5-ANHYDROSORBITOL	0.944792768
SULFORAPHANE	4-METHOXYPHENYLACETIC ACID	0.811877564
5-KETO-D-GLUCONATE	4-METHOXYPHENYLACETIC ACID	0.904716335
4-AMINOHIPPURIC ACID	4-METHOXYPHENYLACETIC ACID	0.867098849
5-NONENOYLGLYCINE	4-METHOXYPHENYLACETIC ACID	0.863039496
2-HYDROXYOCT-2-ENOYLGLYCINE	4-METHOXYPHENYLACETIC ACID	0.860365367
6-HYDROXYOCT-1-ENOYLGLYCINE	4-METHOXYPHENYLACETIC ACID	0.836513188
EQUOL	4-METHOXYPHENYLACETIC ACID	0.804699802
PYRIMETHAMINE	4-METHOXYPHENYLACETIC ACID	0.800292101
ENTECAVIR	4-METHOXYPHENYLACETIC ACID	0.836044793
ISOVALERYLGLUCURONIDE	4-METHOXYPHENYLACETIC ACID	0.802955967
13-CIS RETINOL	4-METHOXYPHENYLACETIC ACID	0.824624343
ZOLMITRIPTAN	4-METHOXYPHENYLACETIC ACID	0.827465672
6-(3-CARBOXY-5-HYDROXYPHENOXY)-3,4,5-TRIHYDROXYOXANE-2-CARBOXYLIC ACID	4-METHOXYPHENYLACETIC ACID	0.852071295
PROSTAGLANDIN F1A	4-METHOXYPHENYLACETIC ACID	0.802766932
6-[3-(2-CARBOXYETHYL)-5-HYDROXYPHENOXY]-3,4,5-TRIHYDROXYOXANE-2-CARBOXYLIC ACID	4-METHOXYPHENYLACETIC ACID	0.83025687
RANOLAZINE	4-METHOXYPHENYLACETIC ACID	0.837196684
ARACHIDONOYLCARNITINE	4-METHOXYPHENYLACETIC ACID	0.828752514
MASLINIC ACID	4-METHOXYPHENYLACETIC ACID	0.937461557
DG(15:0/15:0/0:0)	4-METHOXYPHENYLACETIC ACID	0.847280903
DG(18:0/18:3(9Z,12Z,15Z)/0:0)	4-METHOXYPHENYLACETIC ACID	0.826458809
DG(14:0/22:1(13Z)/0:0)	4-METHOXYPHENYLACETIC ACID	0.800356965
DG(22:5(4Z,7Z,10Z,13Z,16Z)/16:0/0:0)	4-METHOXYPHENYLACETIC ACID	0.844585061
PC(14:1(9Z)/18:1(11Z))	4-METHOXYPHENYLACETIC ACID	0.814441069
PE(20:4(5Z,8Z,11Z,14Z)/20:0)	4-METHOXYPHENYLACETIC ACID	0.805238793
TG(16:0/18:2(9Z,12Z)/20:0)	4-METHOXYPHENYLACETIC ACID	0.853845219
TG(18:0/18:1(9Z)/18:1(9Z))	4-METHOXYPHENYLACETIC ACID	0.854398398
TG(18:0/18:0/20:1(11Z))	4-METHOXYPHENYLACETIC ACID	0.865631151
(R)-2-HYDROXYCAPRYLIC ACID	8-HYDROXYGUANINE	0.998009211
L-3-HYDROXYKYNURENINE	8-HYDROXYGUANINE	0.842637231
DEXRAZOXANE	8-HYDROXYGUANINE	0.875148758
S-(2-CARBOXYPROPYL)-CYSTEAMINE	PHENYLEPHRINE	0.882640214
ASCORBIC ACID	PHENYLEPHRINE	0.915576375
MYO-INOSITOL	PHENYLEPHRINE	0.835027911
N-ACETYLGLUTAMINE	PHENYLEPHRINE	0.943722135
D-THREO-ISOCITRIC ACID	PHENYLEPHRINE	0.910223764
GOLD	PHENYLEPHRINE	0.917937073
6,7-OCTADIENOYLGLYCINE	PHENYLEPHRINE	0.912505747
CLAVULANATE	PHENYLEPHRINE	0.948120648
GAMMA-GLUTAMYLGLYCINE	PHENYLEPHRINE	0.902493614
ETHAMBUTOL	PHENYLEPHRINE	0.91330125
METHYLDOPA	PHENYLEPHRINE	0.807664318
4-NONENOYLGLYCINE	PHENYLEPHRINE	0.922345426
2-HYDROXYOCT-1-ENOYLGLYCINE	PHENYLEPHRINE	0.898003123
7-HYDROXYOCT-5-ENOYLGLYCINE	PHENYLEPHRINE	0.845549998
MIGLUSTAT	PHENYLEPHRINE	0.897790619
N-ACETYLGALACTOSAMINE	PHENYLEPHRINE	0.869190317
3-HYDROXYPHENYLPROPIONYLGLYCINE	PHENYLEPHRINE	0.940007827
ERGOTHIONEINE	PHENYLEPHRINE	0.894929565
2,6-DI-TERT-BUTYL-4-HYDROXY-4-METHYL-2,5-CYCLOHEXADIENONE	PHENYLEPHRINE	0.855364201
URACIL MUSTARD	PHENYLEPHRINE	0.861001406
ACETYL-N-FORMYL-5-METHOXYKYNURENAMINE	PHENYLEPHRINE	0.946981064
5C-AGLYCONE	PHENYLEPHRINE	0.867368597
CIS-VACCENIC ACID	PHENYLEPHRINE	0.88483452
4-HYDROXY TOLBUTAMIDE	PHENYLEPHRINE	0.908066773
VERAPAMIL METABOLITE D-617	PHENYLEPHRINE	0.867248746
SUCCINYLCHOLINE	PHENYLEPHRINE	0.91932166
CISPLATIN	PHENYLEPHRINE	0.916886854
9-CIS-RETINOIC ACID	PHENYLEPHRINE	0.896991561
N,O-BIS- (TRIMETHYLSILYL)PHENYLALANINE	PHENYLEPHRINE	0.911107347
DESOGESTREL	PHENYLEPHRINE	0.899767749
6-(3-CARBOXYPHENOXY)-3,4,5-TRIHYDROXYOXANE-2-CARBOXYLIC ACID	PHENYLEPHRINE	0.840102091
OXYCODONE	PHENYLEPHRINE	0.874721833
DOLASETRON	PHENYLEPHRINE	0.947683446
FUROSEMIDE	PHENYLEPHRINE	0.943828661
CIPROFLOXACIN	PHENYLEPHRINE	0.8499113
GLYCEROPHOSPHOINOSITOL	PHENYLEPHRINE	0.948253374
NICOTINAMIDE RIBOTIDE	PHENYLEPHRINE	0.951809862
6-TRANS-12-EPI-LEUKOTRIENE B4	PHENYLEPHRINE	0.857150098
TENOXICAM	PHENYLEPHRINE	0.927068014
R-138727	PHENYLEPHRINE	0.874585591
HALAZEPAM	PHENYLEPHRINE	0.843182032
MG(0:0/18:3(6Z,9Z,12Z)/0:0)	PHENYLEPHRINE	0.874809966
8-ISOPROSTAGLANDIN F2A	PHENYLEPHRINE	0.931135672
6,15-DIKETO,13,14-DIHYDRO-PGF1A	PHENYLEPHRINE	0.922816899
BORTEZOMIB	PHENYLEPHRINE	0.921069105
LYSOPA(P-16:0/0:0)	PHENYLEPHRINE	0.886419686
ALCLOMETASONE	PHENYLEPHRINE	0.892381046
BETA-TOCOPHEROL	PHENYLEPHRINE	0.918935459
ALPHA-TOCOTRIENOL	PHENYLEPHRINE	0.90416625
DICLOXACILLIN	PHENYLEPHRINE	0.95051986
CEFMETAZOLE	PHENYLEPHRINE	0.840940994
DG(16:1(9Z)/14:1(9Z)/0:0)	PHENYLEPHRINE	0.914295758
2',3'-ANHYDROLUTEIN	PHENYLEPHRINE	0.91789707
DG(14:1(9Z)/18:2(9Z,12Z)/0:0)	PHENYLEPHRINE	0.829276372
DG(14:0/18:1(9Z)/0:0)	PHENYLEPHRINE	0.877796307
DG(18:1(11Z)/14:0/0:0)	PHENYLEPHRINE	0.886144761
DG(14:0/18:0/0:0)	PHENYLEPHRINE	0.848992874
DG(18:3(6Z,9Z,12Z)/16:1(9Z)/0:0)	PHENYLEPHRINE	0.909718853
DG(20:4(5Z,8Z,11Z,14Z)/14:0/0:0)	PHENYLEPHRINE	0.843703587
UROBILINOGEN	PHENYLEPHRINE	0.865226602
DG(20:2(11Z,14Z)/14:1(9Z)/0:0)	PHENYLEPHRINE	0.92224478
DG(18:1(11Z)/16:1(9Z)/0:0)	PHENYLEPHRINE	0.844726233
DG(14:1(9Z)/20:0/0:0)	PHENYLEPHRINE	0.907083804
ASTAXANTHIN	PHENYLEPHRINE	0.949250729
DG(20:3(8Z,11Z,14Z)/16:0/0:0)	PHENYLEPHRINE	0.917843992
DG(18:4(6Z,9Z,12Z,15Z)/20:2(11Z,14Z)/0:0)	PHENYLEPHRINE	0.929147747
DG(20:5(5Z,8Z,11Z,14Z,17Z)/18:0/0:0)	PHENYLEPHRINE	0.879244356
DG(20:1(11Z)/18:0/0:0)	PHENYLEPHRINE	0.903120471
CER(D18:1/25:0)	PHENYLEPHRINE	0.8864551
DG(18:3(9Z,12Z,15Z)/22:4(7Z,10Z,13Z,16Z)/0:0)	PHENYLEPHRINE	0.931823459
PE(P-16:0/18:2(9Z,12Z))	PHENYLEPHRINE	0.905156638
PC(P-18:1(11Z)/14:0)	PHENYLEPHRINE	0.843062594
PC(P-16:0/P-18:1(11Z))	PHENYLEPHRINE	0.88606634
PE(P-18:0/18:1(9Z))	PHENYLEPHRINE	0.912933771
PC(18:1(9Z)/14:0)	PHENYLEPHRINE	0.819069086
PC(P-18:1(9Z)/16:0)	PHENYLEPHRINE	0.92573672
PC(20:3(8Z,11Z,14Z)/14:1(9Z))	PHENYLEPHRINE	0.802493427
GLCCER(D18:1/20:0)	PHENYLEPHRINE	0.885817084
PC(18:1(9Z)/16:0)	PHENYLEPHRINE	0.894147048
PC(P-18:1(9Z)/18:3(9Z,12Z,15Z))	PHENYLEPHRINE	0.844846868
PENTAGASTRIN	PHENYLEPHRINE	0.926242862
PE(14:1(9Z)/24:1(15Z))	PHENYLEPHRINE	0.892851108
PE(20:1(11Z)/18:0)	PHENYLEPHRINE	0.842203232
PG(18:0/18:1(9Z))	PHENYLEPHRINE	0.937709596
PC(18:3(6Z,9Z,12Z)/18:3(9Z,12Z,15Z))	PHENYLEPHRINE	0.896354685
SM(D16:1/24:1(15Z))	PHENYLEPHRINE	0.934645689
PE(22:0/18:4(6Z,9Z,12Z,15Z))	PHENYLEPHRINE	0.913937708
PC(18:2(9Z,12Z)/20:4(5Z,8Z,11Z,14Z))	PHENYLEPHRINE	0.927777906
PC(20:1(11Z)/18:4(6Z,9Z,12Z,15Z))	PHENYLEPHRINE	0.918995354
PC(22:0/P-18:1(11Z))	PHENYLEPHRINE	0.916687872
TG(16:0/16:1(9Z)/18:2(9Z,12Z))	PHENYLEPHRINE	0.916814726
PC(20:0/20:4(8Z,11Z,14Z,17Z))	PHENYLEPHRINE	0.923589807
PC(18:1(11Z)/22:1(13Z))	PHENYLEPHRINE	0.93706419
PC(22:1(13Z)/18:1(9Z))	PHENYLEPHRINE	0.953409646
PC(24:1(15Z)/16:0)	PHENYLEPHRINE	0.925437401
PC(P-18:1(9Z)/24:0)	PHENYLEPHRINE	0.803515023
TG(16:1(9Z)/16:1(9Z)/20:0)	PHENYLEPHRINE	0.966010649
PC(22:2(13Z,16Z)/20:4(5Z,8Z,11Z,14Z))	PHENYLEPHRINE	0.931401482
PC(20:4(5Z,8Z,11Z,14Z)/22:0)	PHENYLEPHRINE	0.921066532
PC(20:1(11Z)/22:1(13Z))	PHENYLEPHRINE	0.816942247
PI(20:2(11Z,14Z)/18:2(9Z,12Z))	PHENYLEPHRINE	0.934576771
TG(16:1(9Z)/20:1(11Z)/20:4(5Z,8Z,11Z,14Z))	PHENYLEPHRINE	0.858893212
TG(18:1(9Z)/18:1(9Z)/20:0)	PHENYLEPHRINE	0.906691847
TG(18:2(9Z,12Z)/20:0/20:0)	PHENYLEPHRINE	0.951165425
HEPTAGLUTAMYL FOLIC ACID	PHENYLEPHRINE	0.900413243
ALTRETAMINE	P-SYNEPHRINE	0.80538095
2-NONENOYLGLYCINE	P-SYNEPHRINE	0.878141795
5-HYDROXYKETAMINE	P-SYNEPHRINE	0.825237165
N4-ACETYLCYTIDINE	P-SYNEPHRINE	0.849126949
N-ACETYLVALINE	PROPYLTHIOURACIL	0.87169997
1-[2-METHYL-3-(METHYLTHIO) ALLYL]CYCLOHEX-2-ENOL	PROPYLTHIOURACIL	0.953148176
ASYMMETRIC DIMETHYLARGININE	PROPYLTHIOURACIL	0.898410103
BIOTIN SULFONE	PROPYLTHIOURACIL	0.853050425
TETRAHYDRODEOXYCORTISOL	PROPYLTHIOURACIL	0.815806162
CARBOPROST TROMETHAMINE	PROPYLTHIOURACIL	0.873453284
25-HYDROXYCHOLESTEROL	PROPYLTHIOURACIL	0.821761627
TOREMIFENE	PROPYLTHIOURACIL	0.962998193
DG(14:0/18:3(6Z,9Z,12Z)/0:0)	PROPYLTHIOURACIL	0.854985532
DG(18:0/22:5(4Z,7Z,10Z,13Z,16Z)/0:0)	PROPYLTHIOURACIL	0.878072205
GLCCER(D18:1/16:0)	PROPYLTHIOURACIL	0.860837346
GLCCER(D18:1/9Z-18:1)	PROPYLTHIOURACIL	0.816915658
PC(14:1(9Z)/20:3(8Z,11Z,14Z))	PROPYLTHIOURACIL	0.8781288
PC(20:2(11Z,14Z)/14:0)	PROPYLTHIOURACIL	0.852129823
PC(20:3(5Z,8Z,11Z)/22:2(13Z,16Z))	PROPYLTHIOURACIL	0.879089107
PC(22:5(4Z,7Z,10Z,13Z,16Z)/20:0)	PROPYLTHIOURACIL	0.842093221
PI(18:2(9Z,12Z)/20:2(11Z,14Z))	PROPYLTHIOURACIL	0.906213823
LACTO-N-FUCOHEPTAOSE	PROPYLTHIOURACIL	0.912162724
CETRORELIX	PROPYLTHIOURACIL	0.845498688
1-METHYLADENINE	GUANIDINOSUCCINIC ACID	0.897093656
PHENYLGLYOXYLIC ACID	GUANIDINOSUCCINIC ACID	0.930471699
(R)-SALSOLINOL	GUANIDINOSUCCINIC ACID	0.913625194
N1-ACETYLSPERMIDINE	GUANIDINOSUCCINIC ACID	0.952556079
5-KETO-D-GLUCONATE	GUANIDINOSUCCINIC ACID	0.823195836
4-AMINOHIPPURIC ACID	GUANIDINOSUCCINIC ACID	0.893074842
TETRAETHYLENE GLYCOL	GUANIDINOSUCCINIC ACID	0.906327136
1,3-DIMETHYLURIC ACID	GUANIDINOSUCCINIC ACID	0.815393227
2,4-OCTADIENOYLGLYCINE	GUANIDINOSUCCINIC ACID	0.893955838
(S)-LIPOIC ACID	GUANIDINOSUCCINIC ACID	0.934642434
PHOSPHOCREATINE	GUANIDINOSUCCINIC ACID	0.869155565
CARMUSTINE	GUANIDINOSUCCINIC ACID	0.886589074
5-NONENOYLGLYCINE	GUANIDINOSUCCINIC ACID	0.899067985
8-NONENOYLGLYCINE	GUANIDINOSUCCINIC ACID	0.969540199
4-ALLYLPHENOL SULFATE	GUANIDINOSUCCINIC ACID	0.905440657
1-HYDROXYOCT-3-ENOYLGLYCINE	GUANIDINOSUCCINIC ACID	0.92679499
2-HYDROXYOCT-2-ENOYLGLYCINE	GUANIDINOSUCCINIC ACID	0.822297427
6-HYDROXYOCT-1-ENOYLGLYCINE	GUANIDINOSUCCINIC ACID	0.953605466
7-HYDROXYOCT-1-ENOYLGLYCINE	GUANIDINOSUCCINIC ACID	0.878388973
GAMMA-GLUTAMYLALANINE	GUANIDINOSUCCINIC ACID	0.840759946
TRIMETHYLSILYL NONANOIC ACID	GUANIDINOSUCCINIC ACID	0.841692026
P-CHLOROBENZENE SULFONYL UREA	GUANIDINOSUCCINIC ACID	0.890874306
EQUOL	GUANIDINOSUCCINIC ACID	0.925506148
2-HYDROXYMYRISTIC ACID	GUANIDINOSUCCINIC ACID	0.884161571
NOREPINEPHRINE SULFATE	GUANIDINOSUCCINIC ACID	0.831920994
3,5-DIHYDROXY-4-(SULFOOXY)BENZOIC ACID	GUANIDINOSUCCINIC ACID	0.825048771
1,2-BENZENEDIOL BIS(TRIMETHYLSILYL) ETHER	GUANIDINOSUCCINIC ACID	0.922327084
KETOROLAC	GUANIDINOSUCCINIC ACID	0.823223185
NICOTINIC ACID RIBONUCLEOSIDE	GUANIDINOSUCCINIC ACID	0.894862781
FRUCTOSE 6-PHOSPHATE	GUANIDINOSUCCINIC ACID	0.842220931
MYO-INOSITOL 1-PHOSPHATE	GUANIDINOSUCCINIC ACID	0.826182208
EPINEPHRINE SULFATE	GUANIDINOSUCCINIC ACID	0.868693858
AMITRIPTYLINE	GUANIDINOSUCCINIC ACID	0.86087298
ISOVALERYLGLUCURONIDE	GUANIDINOSUCCINIC ACID	0.813142493
13-CIS RETINOL	GUANIDINOSUCCINIC ACID	0.888858627
CYPROHEPTADINE	GUANIDINOSUCCINIC ACID	0.828770175
BRIMONIDINE	GUANIDINOSUCCINIC ACID	0.899025989
8,9-EPOXYEICOSATRIENOIC ACID	GUANIDINOSUCCINIC ACID	0.850916624
16(R)-HETE	GUANIDINOSUCCINIC ACID	0.80352549
FAMCICLOVIR	GUANIDINOSUCCINIC ACID	0.906397439
TORASEMIDE	GUANIDINOSUCCINIC ACID	0.856934884
PROSTAGLANDIN F1A	GUANIDINOSUCCINIC ACID	0.927419921
6-[3-(2-CARBOXYETHYL)-5-HYDROXYPHENOXY]-3,4,5-TRIHYDROXYOXANE-2-CARBOXYLIC ACID	GUANIDINOSUCCINIC ACID	0.829523094
CINNARIZINE	GUANIDINOSUCCINIC ACID	0.869421135
BENDROFLUMETHIAZIDE	GUANIDINOSUCCINIC ACID	0.811687493
OXICONAZOLE	GUANIDINOSUCCINIC ACID	0.863183045
RANOLAZINE	GUANIDINOSUCCINIC ACID	0.890854461
BENZTHIAZIDE	GUANIDINOSUCCINIC ACID	0.870688253
ARACHIDONOYLCARNITINE	GUANIDINOSUCCINIC ACID	0.815455185
MASLINIC ACID	GUANIDINOSUCCINIC ACID	0.835458015
DG(14:1(9Z)/16:1(9Z)/0:0)	GUANIDINOSUCCINIC ACID	0.922151592
DG(15:0/15:0/0:0)	GUANIDINOSUCCINIC ACID	0.805215622
DG(16:0/18:1(11Z)/0:0)	GUANIDINOSUCCINIC ACID	0.852434093
DG(18:1(9Z)/18:1(9Z)/0:0)	GUANIDINOSUCCINIC ACID	0.882066325
DG(20:3(5Z,8Z,11Z)/18:2(9Z,12Z)/0:0)	GUANIDINOSUCCINIC ACID	0.861984086
DG(18:2(9Z,12Z)/20:0/0:0)	GUANIDINOSUCCINIC ACID	0.916162489
DG(20:4(8Z,11Z,14Z,17Z)/20:2(11Z,14Z)/0:0)	GUANIDINOSUCCINIC ACID	0.890190309
PC(16:1(9Z)/14:1(9Z))	GUANIDINOSUCCINIC ACID	0.819751169
LACTO-N-TETRAOSE	GUANIDINOSUCCINIC ACID	0.833892371
PC(14:0/P-18:1(11Z))	GUANIDINOSUCCINIC ACID	0.815899008
PC(P-16:0/16:1(9Z))	GUANIDINOSUCCINIC ACID	0.890686688
PC(P-18:1(11Z)/16:1(9Z))	GUANIDINOSUCCINIC ACID	0.902229764
PE(20:0/16:1(9Z))	GUANIDINOSUCCINIC ACID	0.852357157
PG(18:2(9Z,12Z)/16:0)	GUANIDINOSUCCINIC ACID	0.871295494
PG(18:1(9Z)/16:0)	GUANIDINOSUCCINIC ACID	0.862981523
PC(14:1(9Z)/20:3(8Z,11Z,14Z))	GUANIDINOSUCCINIC ACID	0.816908683
PE(20:3(5Z,8Z,11Z)/18:0)	GUANIDINOSUCCINIC ACID	0.86302583
PC(20:1(11Z)/P-16:0)	GUANIDINOSUCCINIC ACID	0.855790153
PC(14:1(9Z)/22:2(13Z,16Z))	GUANIDINOSUCCINIC ACID	0.80199792
PG(18:2(9Z,12Z)/20:3(5Z,8Z,11Z))	GUANIDINOSUCCINIC ACID	0.912046507
PC(P-18:1(9Z)/20:0)	GUANIDINOSUCCINIC ACID	0.887856849
PC(20:5(5Z,8Z,11Z,14Z,17Z)/18:1(9Z))	GUANIDINOSUCCINIC ACID	0.857182992
PC(20:5(5Z,8Z,11Z,14Z,17Z)/18:0)	GUANIDINOSUCCINIC ACID	0.954214083
PC(20:4(8Z,11Z,14Z,17Z)/20:2(11Z,14Z))	GUANIDINOSUCCINIC ACID	0.851630937
PC(20:3(8Z,11Z,14Z)/20:2(11Z,14Z))	GUANIDINOSUCCINIC ACID	0.833667164
TG(16:0/18:2(9Z,12Z)/18:2(9Z,12Z))	GUANIDINOSUCCINIC ACID	0.86769125
PI(18:1(11Z)/18:2(9Z,12Z))	GUANIDINOSUCCINIC ACID	0.864133086
PC(20:1(11Z)/22:5(4Z,7Z,10Z,13Z,16Z))	GUANIDINOSUCCINIC ACID	0.882250123
PI(18:2(9Z,12Z)/20:2(11Z,14Z))	GUANIDINOSUCCINIC ACID	0.811256091
PI(20:3(8Z,11Z,14Z)/20:3(5Z,8Z,11Z))	GUANIDINOSUCCINIC ACID	0.822746232
TG(18:0/18:0/20:1(11Z))	GUANIDINOSUCCINIC ACID	0.802438348
TG(18:2(9Z,12Z)/20:0/20:1(11Z))	GUANIDINOSUCCINIC ACID	0.830232491
3-METHYLADENINE	DEBRISOQUINE	0.938555567
CYSTEINYLGLYCINE	DEBRISOQUINE	0.856579448
ALLO-INOSITOL	DEBRISOQUINE	0.996955326
1-HYDROXYHEXANOYLGLYCINE	DEBRISOQUINE	0.981658811
2,3-OCTADIENOYLGLYCINE	DEBRISOQUINE	0.971054746
(S)-LIPOIC ACID	DEBRISOQUINE	0.850131154
(R)-LIPOIC ACID	DEBRISOQUINE	0.970918212
CARMUSTINE	DEBRISOQUINE	0.832418099
1-HYDROXYOCT-2-ENOYLGLYCINE	DEBRISOQUINE	0.805663578
7-HYDROXYOCT-7-ENOYLGLYCINE	DEBRISOQUINE	0.966180779
GAMMA-GLUTAMYLALANINE	DEBRISOQUINE	0.836929979
HEPTYL CYCLOHEXANE CARBOXYLIC ACID	DEBRISOQUINE	0.980087447
TRIMETHYLSILYL NONANOIC ACID	DEBRISOQUINE	0.885469949
2-HYDROXY-3-(SULFOOXY)BENZOIC ACID	DEBRISOQUINE	0.835378303
1,11-UNDECANEDICARBOXYLIC ACID	DEBRISOQUINE	0.804331553
ASPARTYLLYSINE	DEBRISOQUINE	0.910643097
SPHINGOSINE	DEBRISOQUINE	0.965878524
SERTRALINE	DEBRISOQUINE	0.821688042
WARFARIN	DEBRISOQUINE	0.974277165
REBOXETINE	DEBRISOQUINE	0.984169274
8,9-EPOXYEICOSATRIENOIC ACID	DEBRISOQUINE	0.803516208
15(S)-HYDROXYEICOSATRIENOIC ACID	DEBRISOQUINE	0.83048816
6-(3-CARBOXY-2-HYDROXYPHENOXY)-3,4,5-TRIHYDROXYOXANE-2-CARBOXYLIC ACID	DEBRISOQUINE	0.960867092
6-[4-(CARBOXYMETHYL)-2-HYDROXYPHENOXY]-3,4,5-TRIHYDROXYOXANE-2-CARBOXYLIC ACID	DEBRISOQUINE	0.979581983
GREPAFLOXACIN	DEBRISOQUINE	0.965353564
PROPANTHELINE	DEBRISOQUINE	0.96025898
GENTIAN VIOLET	DEBRISOQUINE	0.838849875
PRAZOSIN	DEBRISOQUINE	0.813166376
DILTIAZEM	DEBRISOQUINE	0.824840808
5-CIS-LYCOPENE	DEBRISOQUINE	0.860513421
GAMMA-CAROTENE	DEBRISOQUINE	0.917691169
NEUROSPORENE	DEBRISOQUINE	0.981245106
GADODIAMIDE	DEBRISOQUINE	0.946490968
DG(18:2(9Z,12Z)/18:4(6Z,9Z,12Z,15Z)/0:0)	DEBRISOQUINE	0.8357125
DG(14:1(9Z)/22:1(13Z)/0:0)	DEBRISOQUINE	0.918692305
DG(20:0/18:2(9Z,12Z)/0:0)	DEBRISOQUINE	0.924082
DG(20:0/18:1(11Z)/0:0)	DEBRISOQUINE	0.850245829
PC(18:3(9Z,12Z,15Z)/14:1(9Z))	DEBRISOQUINE	0.972734554
PE(P-16:0/20:2(11Z,14Z))	DEBRISOQUINE	0.801356134
PE(16:0/20:2(11Z,14Z))	DEBRISOQUINE	0.976181242
PE(18:4(6Z,9Z,12Z,15Z)/22:0)	DEBRISOQUINE	0.880290244
PIMECROLIMUS	DEBRISOQUINE	0.817804815
PI(20:3(5Z,8Z,11Z)/20:3(5Z,8Z,11Z))	DEBRISOQUINE	0.974496433
S-(2-CARBOXYPROPYL)-CYSTEAMINE	ASCORBIC ACID	0.938884025
PHENYLEPHRINE	ASCORBIC ACID	0.915576375
MYO-INOSITOL	ASCORBIC ACID	0.944694633
N-ACETYLGLUTAMINE	ASCORBIC ACID	0.913077605
D-THREO-ISOCITRIC ACID	ASCORBIC ACID	0.894637667
GOLD	ASCORBIC ACID	0.900410298
6,7-OCTADIENOYLGLYCINE	ASCORBIC ACID	0.855756388
CLAVULANATE	ASCORBIC ACID	0.874674919
GAMMA-GLUTAMYLGLYCINE	ASCORBIC ACID	0.93435506
ETHAMBUTOL	ASCORBIC ACID	0.957144447
4-NONENOYLGLYCINE	ASCORBIC ACID	0.888158615
2-HYDROXYOCT-1-ENOYLGLYCINE	ASCORBIC ACID	0.896973471
7-HYDROXYOCT-5-ENOYLGLYCINE	ASCORBIC ACID	0.842137284
MIGLUSTAT	ASCORBIC ACID	0.890670451
N-ACETYLGALACTOSAMINE	ASCORBIC ACID	0.961707553
3-HYDROXYPHENYLPROPIONYLGLYCINE	ASCORBIC ACID	0.918313332
ERGOTHIONEINE	ASCORBIC ACID	0.818691265
2,6-DI-TERT-BUTYL-4-HYDROXY-4-METHYL-2,5-CYCLOHEXADIENONE	ASCORBIC ACID	0.805575494
URACIL MUSTARD	ASCORBIC ACID	0.850183585
CYCLO(LEU-PHE)	ASCORBIC ACID	0.825004638
ACETYL-N-FORMYL-5-METHOXYKYNURENAMINE	ASCORBIC ACID	0.948658076
CIS-VACCENIC ACID	ASCORBIC ACID	0.946376729
4-HYDROXY TOLBUTAMIDE	ASCORBIC ACID	0.929031063
VERAPAMIL METABOLITE D-617	ASCORBIC ACID	0.853942091
SUCCINYLCHOLINE	ASCORBIC ACID	0.944141266
CISPLATIN	ASCORBIC ACID	0.821596562
9-CIS-RETINOIC ACID	ASCORBIC ACID	0.950473255
N,O-BIS- (TRIMETHYLSILYL)PHENYLALANINE	ASCORBIC ACID	0.923665051
DESOGESTREL	ASCORBIC ACID	0.864786133
OXYCODONE	ASCORBIC ACID	0.894940912
MG(15:0/0:0/0:0)	ASCORBIC ACID	0.811416032
DOLASETRON	ASCORBIC ACID	0.947084126
FUROSEMIDE	ASCORBIC ACID	0.951444909
GLYCEROPHOSPHOINOSITOL	ASCORBIC ACID	0.952688584
NICOTINAMIDE RIBOTIDE	ASCORBIC ACID	0.907911139
6-TRANS-12-EPI-LEUKOTRIENE B4	ASCORBIC ACID	0.886152371
TENOXICAM	ASCORBIC ACID	0.878387388
R-138727	ASCORBIC ACID	0.910663927
HALAZEPAM	ASCORBIC ACID	0.853044011
MG(0:0/18:3(6Z,9Z,12Z)/0:0)	ASCORBIC ACID	0.869670858
8-ISOPROSTAGLANDIN F2A	ASCORBIC ACID	0.91875027
6,15-DIKETO,13,14-DIHYDRO-PGF1A	ASCORBIC ACID	0.949887514
BORTEZOMIB	ASCORBIC ACID	0.943452675
LYSOPA(P-16:0/0:0)	ASCORBIC ACID	0.922932525
ALCLOMETASONE	ASCORBIC ACID	0.924113777
BETA-TOCOPHEROL	ASCORBIC ACID	0.899358214
ALPHA-TOCOTRIENOL	ASCORBIC ACID	0.938468361
DICLOXACILLIN	ASCORBIC ACID	0.939439846
CEFMETAZOLE	ASCORBIC ACID	0.830071454
DG(16:1(9Z)/14:1(9Z)/0:0)	ASCORBIC ACID	0.888822054
PHYTOENE	ASCORBIC ACID	0.804901617
2',3'-ANHYDROLUTEIN	ASCORBIC ACID	0.906543554
DG(14:1(9Z)/18:2(9Z,12Z)/0:0)	ASCORBIC ACID	0.82461711
DG(14:0/18:1(9Z)/0:0)	ASCORBIC ACID	0.843114722
DG(18:1(11Z)/14:0/0:0)	ASCORBIC ACID	0.877935285
DG(14:0/18:0/0:0)	ASCORBIC ACID	0.816641385
DG(18:3(6Z,9Z,12Z)/16:1(9Z)/0:0)	ASCORBIC ACID	0.90228235
DG(20:4(5Z,8Z,11Z,14Z)/14:0/0:0)	ASCORBIC ACID	0.875976515
UROBILINOGEN	ASCORBIC ACID	0.877072876
DG(20:2(11Z,14Z)/14:1(9Z)/0:0)	ASCORBIC ACID	0.898371
DG(18:1(11Z)/16:1(9Z)/0:0)	ASCORBIC ACID	0.884183054
DG(14:1(9Z)/20:0/0:0)	ASCORBIC ACID	0.859366068
ASTAXANTHIN	ASCORBIC ACID	0.914335447
DG(20:3(8Z,11Z,14Z)/16:0/0:0)	ASCORBIC ACID	0.881156569
DG(18:4(6Z,9Z,12Z,15Z)/20:2(11Z,14Z)/0:0)	ASCORBIC ACID	0.895144511
DG(20:5(5Z,8Z,11Z,14Z,17Z)/18:0/0:0)	ASCORBIC ACID	0.917524497
DG(20:1(11Z)/18:0/0:0)	ASCORBIC ACID	0.884780073
CER(D18:1/25:0)	ASCORBIC ACID	0.929595151
DG(18:3(9Z,12Z,15Z)/22:4(7Z,10Z,13Z,16Z)/0:0)	ASCORBIC ACID	0.945654625
PE(P-16:0/18:2(9Z,12Z))	ASCORBIC ACID	0.874699942
PC(P-16:0/P-18:1(11Z))	ASCORBIC ACID	0.886947553
PE(P-18:0/18:1(9Z))	ASCORBIC ACID	0.921087842
PC(P-18:1(9Z)/16:0)	ASCORBIC ACID	0.946318257
PC(20:3(8Z,11Z,14Z)/14:1(9Z))	ASCORBIC ACID	0.807081901
GLCCER(D18:1/20:0)	ASCORBIC ACID	0.817987386
PC(18:1(9Z)/16:0)	ASCORBIC ACID	0.856546009
PC(P-18:1(9Z)/18:3(9Z,12Z,15Z))	ASCORBIC ACID	0.837159583
PENTAGASTRIN	ASCORBIC ACID	0.852286296
PE(14:1(9Z)/24:1(15Z))	ASCORBIC ACID	0.935560257
PG(18:0/18:1(9Z))	ASCORBIC ACID	0.918974278
PC(18:3(6Z,9Z,12Z)/18:3(9Z,12Z,15Z))	ASCORBIC ACID	0.825422437
PC(18:1(9Z)/18:2(9Z,12Z))	ASCORBIC ACID	0.80327285
SM(D16:1/24:1(15Z))	ASCORBIC ACID	0.912470885
PE(22:0/18:4(6Z,9Z,12Z,15Z))	ASCORBIC ACID	0.934490011
PC(18:2(9Z,12Z)/20:4(5Z,8Z,11Z,14Z))	ASCORBIC ACID	0.856746613
PC(20:1(11Z)/18:4(6Z,9Z,12Z,15Z))	ASCORBIC ACID	0.953172803
PC(22:0/P-18:1(11Z))	ASCORBIC ACID	0.914592384
TG(16:0/16:1(9Z)/18:2(9Z,12Z))	ASCORBIC ACID	0.909804942
PC(20:0/20:4(8Z,11Z,14Z,17Z))	ASCORBIC ACID	0.886228174
PC(18:1(11Z)/22:1(13Z))	ASCORBIC ACID	0.883997105
PC(22:1(13Z)/18:1(9Z))	ASCORBIC ACID	0.932049653
PC(24:1(15Z)/16:0)	ASCORBIC ACID	0.939448125
PC(P-18:1(9Z)/24:0)	ASCORBIC ACID	0.832496002
TG(16:1(9Z)/16:1(9Z)/20:0)	ASCORBIC ACID	0.954607013
PC(22:2(13Z,16Z)/20:4(5Z,8Z,11Z,14Z))	ASCORBIC ACID	0.874215394
PC(20:4(5Z,8Z,11Z,14Z)/22:0)	ASCORBIC ACID	0.931511564
PC(22:1(13Z)/20:3(5Z,8Z,11Z))	ASCORBIC ACID	0.821570873
PC(20:1(11Z)/22:1(13Z))	ASCORBIC ACID	0.805291556
PI(20:2(11Z,14Z)/18:2(9Z,12Z))	ASCORBIC ACID	0.899353257
TG(16:1(9Z)/20:1(11Z)/20:4(5Z,8Z,11Z,14Z))	ASCORBIC ACID	0.820995514
TG(18:1(9Z)/18:1(9Z)/20:0)	ASCORBIC ACID	0.906933811
TG(18:2(9Z,12Z)/20:0/20:0)	ASCORBIC ACID	0.898303994
HEPTAGLUTAMYL FOLIC ACID	ASCORBIC ACID	0.886560257
4-METHOXYPHENYLACETIC ACID	SULFORAPHANE	0.811877564
N1-ACETYLSPERMIDINE	SULFORAPHANE	0.812809717
4-AMINOHIPPURIC ACID	SULFORAPHANE	0.857463751
TETRAETHYLENE GLYCOL	SULFORAPHANE	0.809272013
1,3-DIMETHYLURIC ACID	SULFORAPHANE	0.859746366
(S)-LIPOIC ACID	SULFORAPHANE	0.883837709
SEDOHEPTULOSE	SULFORAPHANE	0.800958956
CARMUSTINE	SULFORAPHANE	0.887462593
5-NONENOYLGLYCINE	SULFORAPHANE	0.884236419
1-HYDROXYOCT-3-ENOYLGLYCINE	SULFORAPHANE	0.802630106
2-HYDROXYOCT-2-ENOYLGLYCINE	SULFORAPHANE	0.810445148
5-HYDROXYOCT-1-ENOYLGLYCINE	SULFORAPHANE	0.821814328
6-HYDROXYOCT-1-ENOYLGLYCINE	SULFORAPHANE	0.844426683
GAMMA-GLUTAMYLALANINE	SULFORAPHANE	0.970498263
TRIMETHYLSILYL NONANOIC ACID	SULFORAPHANE	0.956137859
2-HYDROXY-3-(SULFOOXY)BENZOIC ACID	SULFORAPHANE	0.934943395
P-CHLOROBENZENE SULFONYL UREA	SULFORAPHANE	0.882095479
1,11-UNDECANEDICARBOXYLIC ACID	SULFORAPHANE	0.877820188
NOREPINEPHRINE SULFATE	SULFORAPHANE	0.839069615
KETOROLAC	SULFORAPHANE	0.818691029
ENTECAVIR	SULFORAPHANE	0.830182642
ISOVALERYLGLUCURONIDE	SULFORAPHANE	0.833650439
BRIMONIDINE	SULFORAPHANE	0.814263748
WARFARIN	SULFORAPHANE	0.803400245
REBOXETINE	SULFORAPHANE	0.823088463
8,9-EPOXYEICOSATRIENOIC ACID	SULFORAPHANE	0.811501797
6-(3-CARBOXY-5-HYDROXYPHENOXY)-3,4,5-TRIHYDROXYOXANE-2-CARBOXYLIC ACID	SULFORAPHANE	0.833029744
NICOTINE GLUCURONIDE	SULFORAPHANE	0.810917112
6-[4-(CARBOXYMETHYL)-2-HYDROXYPHENOXY]-3,4,5-TRIHYDROXYOXANE-2-CARBOXYLIC ACID	SULFORAPHANE	0.807588017
PROSTAGLANDIN F1A	SULFORAPHANE	0.85849484
GREPAFLOXACIN	SULFORAPHANE	0.852967645
PROPANTHELINE	SULFORAPHANE	0.814295791
GENTIAN VIOLET	SULFORAPHANE	0.930797717
DILTIAZEM	SULFORAPHANE	0.912252781
BENZTHIAZIDE	SULFORAPHANE	0.812710517
MASLINIC ACID	SULFORAPHANE	0.838656564
5-CIS-LYCOPENE	SULFORAPHANE	0.837979913
DG(14:1(9Z)/16:1(9Z)/0:0)	SULFORAPHANE	0.842826479
DG(15:0/15:0/0:0)	SULFORAPHANE	0.812394045
GADODIAMIDE	SULFORAPHANE	0.838365669
DG(18:0/18:3(9Z,12Z,15Z)/0:0)	SULFORAPHANE	0.802378916
DG(22:5(4Z,7Z,10Z,13Z,16Z)/16:0/0:0)	SULFORAPHANE	0.887046553
DG(22:4(7Z,10Z,13Z,16Z)/16:0/0:0)	SULFORAPHANE	0.806721852
DG(20:4(5Z,8Z,11Z,14Z)/20:3(8Z,11Z,14Z)/0:0)	SULFORAPHANE	0.840782537
DG(20:4(8Z,11Z,14Z,17Z)/20:2(11Z,14Z)/0:0)	SULFORAPHANE	0.832057487
LACTO-N-TETRAOSE	SULFORAPHANE	0.874003959
PC(14:0/P-18:1(11Z))	SULFORAPHANE	0.838382473
PE(P-16:0/20:2(11Z,14Z))	SULFORAPHANE	0.893404354
PC(P-18:1(11Z)/16:1(9Z))	SULFORAPHANE	0.845186823
PC(20:3(5Z,8Z,11Z)/16:0)	SULFORAPHANE	0.802464926
PC(22:2(13Z,16Z)/14:1(9Z))	SULFORAPHANE	0.83245346
PE(18:4(6Z,9Z,12Z,15Z)/22:0)	SULFORAPHANE	0.869285965
PE(20:4(5Z,8Z,11Z,14Z)/20:0)	SULFORAPHANE	0.850394761
PC(20:2(11Z,14Z)/18:4(6Z,9Z,12Z,15Z))	SULFORAPHANE	0.800119703
PC(20:5(5Z,8Z,11Z,14Z,17Z)/18:1(9Z))	SULFORAPHANE	0.916563516
LACTO-N-FUCOPENTAOSE III	SULFORAPHANE	0.897450415
PC(20:1(11Z)/22:5(4Z,7Z,10Z,13Z,16Z))	SULFORAPHANE	0.856052048
PI(20:3(5Z,8Z,11Z)/20:3(5Z,8Z,11Z))	SULFORAPHANE	0.859749917
TG(18:0/18:0/20:1(11Z))	SULFORAPHANE	0.815033372
3-METHYLADENINE	CYSTEINYLGLYCINE	0.907839912
DEBRISOQUINE	CYSTEINYLGLYCINE	0.856579448
ALLO-INOSITOL	CYSTEINYLGLYCINE	0.871837321
1-HYDROXYHEXANOYLGLYCINE	CYSTEINYLGLYCINE	0.849481027
(R)-LIPOIC ACID	CYSTEINYLGLYCINE	0.892313493
7-HYDROXYOCT-7-ENOYLGLYCINE	CYSTEINYLGLYCINE	0.832448507
HEPTYL CYCLOHEXANE CARBOXYLIC ACID	CYSTEINYLGLYCINE	0.834115541
ASPARTYLLYSINE	CYSTEINYLGLYCINE	0.801885529
REBOXETINE	CYSTEINYLGLYCINE	0.843921637
6-[4-(CARBOXYMETHYL)-2-HYDROXYPHENOXY]-3,4,5-TRIHYDROXYOXANE-2-CARBOXYLIC ACID	CYSTEINYLGLYCINE	0.801107187
6-HYDROXYMETHYLETORICOXIB	CYSTEINYLGLYCINE	0.944681178
GAMMA-CAROTENE	CYSTEINYLGLYCINE	0.816559293
DG(14:1(9Z)/22:1(13Z)/0:0)	CYSTEINYLGLYCINE	0.876370331
DG(20:0/18:2(9Z,12Z)/0:0)	CYSTEINYLGLYCINE	0.800576231
DG(18:1(9Z)/22:6(4Z,7Z,10Z,13Z,16Z,19Z)/0:0)	CYSTEINYLGLYCINE	0.80820446
PC(18:3(9Z,12Z,15Z)/14:1(9Z))	CYSTEINYLGLYCINE	0.84064015
PE(16:0/20:2(11Z,14Z))	CYSTEINYLGLYCINE	0.836187436
TRIHEXOSYLCERAMIDE (D18:1/22:0)	CYSTEINYLGLYCINE	0.859688367
2,7-OCTADIENOYLGLYCINE	5-PHENYLVALERIC ACID	0.941418453
1,5-ANHYDROSORBITOL	GLUCOSAMINE	0.895945158
1,1-DIMETHYLETHYL HEPTANOIC ACID	GLUCOSAMINE	0.93556557
2-HYDROXYDECANOATE	GLUCOSAMINE	0.904236308
N-PROPIONYLMETHIONINE	GLUCOSAMINE	0.821663205
PRAMIPEXOLE	GLUCOSAMINE	0.853627
ISOLEUCYLPROLINE	GLUCOSAMINE	0.882804064
MELATONIN	GLUCOSAMINE	0.928292001
TICLOPIDINE	GLUCOSAMINE	0.85812344
FORMONONETIN	GLUCOSAMINE	0.834786839
SULFAMETHIZOLE	GLUCOSAMINE	0.915120968
N-PHENYLACETYLPHENYLALANINE	GLUCOSAMINE	0.86790405
4-HYDROXYESTRONE	GLUCOSAMINE	0.937311361
ETODOLAC	GLUCOSAMINE	0.954632615
N-ACETYLNEURAMINIC ACID	GLUCOSAMINE	0.862111812
18-HYDROXYARACHIDONIC ACID	GLUCOSAMINE	0.924530452
OLEOYLETHANOLAMIDE	GLUCOSAMINE	0.858040744
MG(16:0/0:0/0:0)	GLUCOSAMINE	0.810967804
DODECANOYLCARNITINE	GLUCOSAMINE	0.831553321
OMEPRAZOLE	GLUCOSAMINE	0.951480299
13,14-DIHYDRO-15-KETO PGF2A	GLUCOSAMINE	0.923448476
LYSOPE(15:0/0:0)	GLUCOSAMINE	0.957349124
ZEAXANTHIN	GLUCOSAMINE	0.957016598
DG(18:2(9Z,12Z)/20:3(5Z,8Z,11Z)/0:0)	GLUCOSAMINE	0.836077038
PA(16:0/18:1(11Z))	GLUCOSAMINE	0.864982756
PC(15:0/15:0)	GLUCOSAMINE	0.95952022
PE(16:0/20:1(11Z))	GLUCOSAMINE	0.859367382
VINDESINE	GLUCOSAMINE	0.815618276
PC(P-18:1(9Z)/18:4(6Z,9Z,12Z,15Z))	GLUCOSAMINE	0.855215467
PG(18:2(9Z,12Z)/18:3(9Z,12Z,15Z))	GLUCOSAMINE	0.945684437
PC(22:4(7Z,10Z,13Z,16Z)/14:0)	GLUCOSAMINE	0.917529056
PC(18:1(11Z)/18:1(9Z))	GLUCOSAMINE	0.819670168
PE(22:4(7Z,10Z,13Z,16Z)/18:1(9Z))	GLUCOSAMINE	0.912071254
PC(P-18:1(9Z)/22:4(7Z,10Z,13Z,16Z))	GLUCOSAMINE	0.904654474
TG(16:1(9Z)/16:1(9Z)/18:2(9Z,12Z))	GLUCOSAMINE	0.897361727
PC(18:1(11Z)/22:2(13Z,16Z))	GLUCOSAMINE	0.936227837
PC(22:2(13Z,16Z)/20:4(8Z,11Z,14Z,17Z))	GLUCOSAMINE	0.938741533
PC(22:4(7Z,10Z,13Z,16Z)/20:1(11Z))	GLUCOSAMINE	0.94096898
PI(18:1(11Z)/20:3(5Z,8Z,11Z))	GLUCOSAMINE	0.947042093
1-METHYLADENINE	(R)-SALSOLINOL	0.94621631
PHENYLGLYOXYLIC ACID	(R)-SALSOLINOL	0.992539434
GUANIDINOSUCCINIC ACID	(R)-SALSOLINOL	0.913625194
N1-ACETYLSPERMIDINE	(R)-SALSOLINOL	0.89487097
4-AMINOHIPPURIC ACID	(R)-SALSOLINOL	0.810625845
2,4-OCTADIENOYLGLYCINE	(R)-SALSOLINOL	0.876017471
(S)-LIPOIC ACID	(R)-SALSOLINOL	0.828301062
PHOSPHOCREATINE	(R)-SALSOLINOL	0.870194258
5-NONENOYLGLYCINE	(R)-SALSOLINOL	0.804709184
8-NONENOYLGLYCINE	(R)-SALSOLINOL	0.906273311
4-ALLYLPHENOL SULFATE	(R)-SALSOLINOL	0.861619636
1-HYDROXYOCT-3-ENOYLGLYCINE	(R)-SALSOLINOL	0.848150918
6-HYDROXYOCT-1-ENOYLGLYCINE	(R)-SALSOLINOL	0.879125347
7-HYDROXYOCT-1-ENOYLGLYCINE	(R)-SALSOLINOL	0.836265897
EQUOL	(R)-SALSOLINOL	0.892551837
2-HYDROXYMYRISTIC ACID	(R)-SALSOLINOL	0.814915296
1,2-BENZENEDIOL BIS(TRIMETHYLSILYL) ETHER	(R)-SALSOLINOL	0.885752951
NICOTINIC ACID RIBONUCLEOSIDE	(R)-SALSOLINOL	0.869644537
FRUCTOSE 6-PHOSPHATE	(R)-SALSOLINOL	0.851702129
EPINEPHRINE SULFATE	(R)-SALSOLINOL	0.825476318
BIOTIN SULFONE	(R)-SALSOLINOL	0.810946424
AMITRIPTYLINE	(R)-SALSOLINOL	0.888584243
13-CIS RETINOL	(R)-SALSOLINOL	0.821327826
BRIMONIDINE	(R)-SALSOLINOL	0.837899099
FAMCICLOVIR	(R)-SALSOLINOL	0.849749801
PROSTAGLANDIN F1A	(R)-SALSOLINOL	0.855621984
CINNARIZINE	(R)-SALSOLINOL	0.822181198
LYSOPA(0:0/16:0)	(R)-SALSOLINOL	0.815786964
RANOLAZINE	(R)-SALSOLINOL	0.845885
BENZTHIAZIDE	(R)-SALSOLINOL	0.816246297
VALSARTAN	(R)-SALSOLINOL	0.817255516
DG(14:1(9Z)/16:1(9Z)/0:0)	(R)-SALSOLINOL	0.865577581
DG(16:0/18:1(11Z)/0:0)	(R)-SALSOLINOL	0.85937706
CER(D18:0/23:0)	(R)-SALSOLINOL	0.867663052
DG(20:3(5Z,8Z,11Z)/18:2(9Z,12Z)/0:0)	(R)-SALSOLINOL	0.85087895
DG(18:2(9Z,12Z)/20:0/0:0)	(R)-SALSOLINOL	0.81723364
DG(20:4(8Z,11Z,14Z,17Z)/20:2(11Z,14Z)/0:0)	(R)-SALSOLINOL	0.830467642
DG(20:2(11Z,14Z)/20:2(11Z,14Z)/0:0)	(R)-SALSOLINOL	0.836467774
PC(P-16:0/16:1(9Z))	(R)-SALSOLINOL	0.810211156
PC(P-18:1(11Z)/16:1(9Z))	(R)-SALSOLINOL	0.810898521
PE(20:0/16:1(9Z))	(R)-SALSOLINOL	0.884869055
PG(18:2(9Z,12Z)/16:0)	(R)-SALSOLINOL	0.845078403
PC(14:1(9Z)/20:3(8Z,11Z,14Z))	(R)-SALSOLINOL	0.834347294
PC(20:2(11Z,14Z)/14:0)	(R)-SALSOLINOL	0.801266797
PC(20:1(11Z)/P-16:0)	(R)-SALSOLINOL	0.830968952
PG(18:2(9Z,12Z)/20:3(5Z,8Z,11Z))	(R)-SALSOLINOL	0.895738577
PC(20:4(5Z,8Z,11Z,14Z)/18:1(9Z))	(R)-SALSOLINOL	0.869629908
PC(20:5(5Z,8Z,11Z,14Z,17Z)/18:0)	(R)-SALSOLINOL	0.935244938
PC(20:4(8Z,11Z,14Z,17Z)/20:2(11Z,14Z))	(R)-SALSOLINOL	0.822015876
PC(20:3(8Z,11Z,14Z)/20:2(11Z,14Z))	(R)-SALSOLINOL	0.907887871
PI(18:2(9Z,12Z)/20:2(11Z,14Z))	(R)-SALSOLINOL	0.849135646
PI(20:3(8Z,11Z,14Z)/20:3(5Z,8Z,11Z))	(R)-SALSOLINOL	0.82343647
TG(18:2(9Z,12Z)/20:0/20:1(11Z))	(R)-SALSOLINOL	0.836965836
L-FUCOSE	MEXILETINE	0.841020267
MONOMETHYL PHTHALATE	MEXILETINE	0.903040858
CARBIMAZOLE	MEXILETINE	0.918104353
4-OCTENOYLGLYCINE	MEXILETINE	0.806762848
ASYMMETRIC DIMETHYLARGININE	MEXILETINE	0.862823049
5-HYDROXYPHENYLPROPIONYLGLYCINE	MEXILETINE	0.945786823
NALIDIXIC ACID	MEXILETINE	0.857798457
DOPAMINE 4-SULFATE	MEXILETINE	0.912657124
FRUCTOSE 6-PHOSPHATE	MEXILETINE	0.81479896
BIOTIN SULFONE	MEXILETINE	0.863291662
MORPHINE	MEXILETINE	0.815673106
PIROXICAM	MEXILETINE	0.847919213
25-HYDROXYCHOLESTEROL	MEXILETINE	0.820801101
5-METHYLTETRAHYDROFOLIC ACID	MEXILETINE	0.826145563
DG(15:0/15:0/0:0)	MEXILETINE	0.822756646
DG(18:1(11Z)/16:0/0:0)	MEXILETINE	0.816662303
DG(14:0/22:1(13Z)/0:0)	MEXILETINE	0.809011227
DG(20:3(5Z,8Z,11Z)/18:2(9Z,12Z)/0:0)	MEXILETINE	0.839943853
PC(14:0/18:3(6Z,9Z,12Z))	MEXILETINE	0.852656077
PG(18:0/16:1(9Z))	MEXILETINE	0.817726174
PC(14:1(9Z)/20:3(8Z,11Z,14Z))	MEXILETINE	0.828866548
PC(P-18:1(9Z)/20:3(8Z,11Z,14Z))	MEXILETINE	0.814905878
TG(16:0/18:2(9Z,12Z)/20:0)	MEXILETINE	0.813315479
TG(18:0/18:1(9Z)/18:1(9Z))	MEXILETINE	0.813643025
TG(18:0/18:0/20:1(11Z))	MEXILETINE	0.836707718
N-ACETYLVALINE	MONOMETHYL PHTHALATE	0.826787488
L-FUCOSE	MONOMETHYL PHTHALATE	0.925020758
MEXILETINE	MONOMETHYL PHTHALATE	0.903040858
CARBIMAZOLE	MONOMETHYL PHTHALATE	0.988223265
4-AMINOHIPPURIC ACID	MONOMETHYL PHTHALATE	0.83792532
ASYMMETRIC DIMETHYLARGININE	MONOMETHYL PHTHALATE	0.859180551
5-NONENOYLGLYCINE	MONOMETHYL PHTHALATE	0.821517327
5-HYDROXYPHENYLPROPIONYLGLYCINE	MONOMETHYL PHTHALATE	0.933044331
NABUMETONE	MONOMETHYL PHTHALATE	0.844654269
NALIDIXIC ACID	MONOMETHYL PHTHALATE	0.87413085
DOPAMINE 4-SULFATE	MONOMETHYL PHTHALATE	0.95410386
EQUOL	MONOMETHYL PHTHALATE	0.809129118
BIOTIN SULFONE	MONOMETHYL PHTHALATE	0.921241397
ENTECAVIR	MONOMETHYL PHTHALATE	0.834909075
MORPHINE	MONOMETHYL PHTHALATE	0.839593374
PIROXICAM	MONOMETHYL PHTHALATE	0.842802275
PENTAMIDINE	MONOMETHYL PHTHALATE	0.836781004
25-HYDROXYCHOLESTEROL	MONOMETHYL PHTHALATE	0.84639268
BENDROFLUMETHIAZIDE	MONOMETHYL PHTHALATE	0.854164433
RANOLAZINE	MONOMETHYL PHTHALATE	0.830657119
ARACHIDONOYLCARNITINE	MONOMETHYL PHTHALATE	0.82457426
5-METHYLTETRAHYDROFOLIC ACID	MONOMETHYL PHTHALATE	0.830660054
GUANOSINE TRIPHOSPHATE	MONOMETHYL PHTHALATE	0.859405472
DG(15:0/15:0/0:0)	MONOMETHYL PHTHALATE	0.86487825
DG(18:1(11Z)/16:0/0:0)	MONOMETHYL PHTHALATE	0.828476434
DG(18:0/18:3(9Z,12Z,15Z)/0:0)	MONOMETHYL PHTHALATE	0.816267324
DG(14:0/22:1(13Z)/0:0)	MONOMETHYL PHTHALATE	0.831311375
DG(20:3(8Z,11Z,14Z)/20:4(5Z,8Z,11Z,14Z)/0:0)	MONOMETHYL PHTHALATE	0.810397009
DG(20:5(5Z,8Z,11Z,14Z,17Z)/20:1(11Z)/0:0)	MONOMETHYL PHTHALATE	0.831525845
DG(20:2(11Z,14Z)/20:2(11Z,14Z)/0:0)	MONOMETHYL PHTHALATE	0.804773812
PA(18:1(11Z)/18:1(11Z))	MONOMETHYL PHTHALATE	0.821659342
LACTO-N-TETRAOSE	MONOMETHYL PHTHALATE	0.800203128
PE(20:0/16:1(9Z))	MONOMETHYL PHTHALATE	0.831360641
PC(14:1(9Z)/20:3(8Z,11Z,14Z))	MONOMETHYL PHTHALATE	0.897436852
PE(20:4(5Z,8Z,11Z,14Z)/20:0)	MONOMETHYL PHTHALATE	0.810518939
PC(20:3(8Z,11Z,14Z)/18:0)	MONOMETHYL PHTHALATE	0.806234175
PC(22:0/16:1(9Z))	MONOMETHYL PHTHALATE	0.802674164
PI(18:1(9Z)/18:1(9Z))	MONOMETHYL PHTHALATE	0.829061564
PC(18:0/24:0)	MONOMETHYL PHTHALATE	0.83645394
PI(18:2(9Z,12Z)/20:2(11Z,14Z))	MONOMETHYL PHTHALATE	0.837190322
TG(16:0/18:2(9Z,12Z)/20:0)	MONOMETHYL PHTHALATE	0.863527033
TG(18:0/18:1(9Z)/18:1(9Z))	MONOMETHYL PHTHALATE	0.863913971
PI(20:3(8Z,11Z,14Z)/20:3(5Z,8Z,11Z))	MONOMETHYL PHTHALATE	0.804788528
TG(18:0/18:0/20:1(11Z))	MONOMETHYL PHTHALATE	0.876694338
TG(18:2(9Z,12Z)/20:0/20:1(11Z))	MONOMETHYL PHTHALATE	0.803379938
TRIHEXOSYLCERAMIDE (D18:1/24:1(15Z))	MONOMETHYL PHTHALATE	0.825720822
1,4-BIS-(1,1-DIMETHYLETHYL)-BENZENE	D-GLUCOSE	0.956419766
TETRAETHYLENE GLYCOL	D-GLUCOSE	0.820058059
1,3-DIMETHYLURIC ACID	D-GLUCOSE	0.83854943
1,4-OCTADIENOYLGLYCINE	D-GLUCOSE	0.913827964
1,7-OCTADIENOYLGLYCINE	D-GLUCOSE	0.982550066
1-HYDROXYOCT-2-ENOYLGLYCINE	D-GLUCOSE	0.932058875
2-HYDROXYOCT-6-ENOYLGLYCINE	D-GLUCOSE	0.819551653
2-HYDROXYPHENYLPROPIONYLGLYCINE	D-GLUCOSE	0.945837194
CYTIDINE	D-GLUCOSE	0.810756188
2-[4-HYDROXY-3-(SULFOOXY)PHENYL]ACETIC ACID	D-GLUCOSE	0.810157341
NOREPINEPHRINE SULFATE	D-GLUCOSE	0.917776754
KETOROLAC	D-GLUCOSE	0.813969296
ETHOXZOLAMIDE	D-GLUCOSE	0.832163107
METOPROLOL	D-GLUCOSE	0.932772336
LUTEOLIN	D-GLUCOSE	0.854778929
CYPROHEPTADINE	D-GLUCOSE	0.961611213
BRIMONIDINE	D-GLUCOSE	0.837961479
FLUOXETINE	D-GLUCOSE	0.862770142
8,9-EPOXYEICOSATRIENOIC ACID	D-GLUCOSE	0.907836877
PRAZOSIN	D-GLUCOSE	0.951578438
6-HYDROXYFLUVASTATIN	D-GLUCOSE	0.915882525
BENZTHIAZIDE	D-GLUCOSE	0.938640596
RAFFINOSE	D-GLUCOSE	0.802497999
CLOMOCYCLINE	D-GLUCOSE	0.929718215
DG(14:1(9Z)/16:1(9Z)/0:0)	D-GLUCOSE	0.894342075
HEME	D-GLUCOSE	0.853336679
DG(20:2(11Z,14Z)/18:2(9Z,12Z)/0:0)	D-GLUCOSE	0.927675796
DG(20:0/18:1(11Z)/0:0)	D-GLUCOSE	0.939332315
DG(20:4(5Z,8Z,11Z,14Z)/20:3(8Z,11Z,14Z)/0:0)	D-GLUCOSE	0.802604118
DG(20:4(8Z,11Z,14Z,17Z)/20:2(11Z,14Z)/0:0)	D-GLUCOSE	0.923384039
PE(P-16:0/20:2(11Z,14Z))	D-GLUCOSE	0.812647856
PC(18:4(6Z,9Z,12Z,15Z)/16:0)	D-GLUCOSE	0.827055746
PE(18:0/20:2(11Z,14Z))	D-GLUCOSE	0.805037328
PC(18:1(11Z)/18:2(9Z,12Z))	D-GLUCOSE	0.934818582
PC(22:1(13Z)/14:0)	D-GLUCOSE	0.839676771
PI(16:0/18:1(11Z))	D-GLUCOSE	0.813472002
PI(18:0/22:4(7Z,10Z,13Z,16Z))	D-GLUCOSE	0.842577056
TG(20:1(11Z)/20:1(11Z)/20:4(5Z,8Z,11Z,14Z))	D-GLUCOSE	0.844663301
TRIHEXOSYLCERAMIDE (D18:1/16:0)	D-GLUCOSE	0.830883086
S-(2-CARBOXYPROPYL)-CYSTEAMINE	MYO-INOSITOL	0.859258825
PHENYLEPHRINE	MYO-INOSITOL	0.835027911
ASCORBIC ACID	MYO-INOSITOL	0.944694633
N-ACETYLGLUTAMINE	MYO-INOSITOL	0.819246312
D-THREO-ISOCITRIC ACID	MYO-INOSITOL	0.813988562
GOLD	MYO-INOSITOL	0.845808051
GAMMA-GLUTAMYLGLYCINE	MYO-INOSITOL	0.881683119
ETHAMBUTOL	MYO-INOSITOL	0.891631378
MIGLUSTAT	MYO-INOSITOL	0.85593891
N-ACETYLGALACTOSAMINE	MYO-INOSITOL	0.897353001
3-HYDROXYPHENYLPROPIONYLGLYCINE	MYO-INOSITOL	0.825440569
2-[4-(SULFOOXY)PHENYL]ACETIC ACID	MYO-INOSITOL	0.842895953
URACIL MUSTARD	MYO-INOSITOL	0.834032957
ACETYL-N-FORMYL-5-METHOXYKYNURENAMINE	MYO-INOSITOL	0.888121881
CIS-VACCENIC ACID	MYO-INOSITOL	0.893049993
4-HYDROXY TOLBUTAMIDE	MYO-INOSITOL	0.833100938
CYANIDIN	MYO-INOSITOL	0.808625037
SUCCINYLCHOLINE	MYO-INOSITOL	0.883657992
9-CIS-RETINOIC ACID	MYO-INOSITOL	0.901074343
N,O-BIS- (TRIMETHYLSILYL)PHENYLALANINE	MYO-INOSITOL	0.811295219
DOLASETRON	MYO-INOSITOL	0.868932298
FUROSEMIDE	MYO-INOSITOL	0.850724206
GLYCEROPHOSPHOINOSITOL	MYO-INOSITOL	0.886267108
NICOTINAMIDE RIBOTIDE	MYO-INOSITOL	0.829201305
6-TRANS-12-EPI-LEUKOTRIENE B4	MYO-INOSITOL	0.81525215
TENOXICAM	MYO-INOSITOL	0.820097513
R-138727	MYO-INOSITOL	0.858804147
6,15-DIKETO,13,14-DIHYDRO-PGF1A	MYO-INOSITOL	0.89015632
BORTEZOMIB	MYO-INOSITOL	0.877399868
LYSOPA(P-16:0/0:0)	MYO-INOSITOL	0.87989113
ALCLOMETASONE	MYO-INOSITOL	0.868272755
ALPHA-TOCOTRIENOL	MYO-INOSITOL	0.884119767
DICLOXACILLIN	MYO-INOSITOL	0.872667557
DG(16:1(9Z)/14:1(9Z)/0:0)	MYO-INOSITOL	0.825171381
PHYTOENE	MYO-INOSITOL	0.855493583
DG(18:3(6Z,9Z,12Z)/16:1(9Z)/0:0)	MYO-INOSITOL	0.80442053
ASTAXANTHIN	MYO-INOSITOL	0.8501128
DG(18:4(6Z,9Z,12Z,15Z)/20:2(11Z,14Z)/0:0)	MYO-INOSITOL	0.829870401
DG(18:1(11Z)/20:4(5Z,8Z,11Z,14Z)/0:0)	MYO-INOSITOL	0.844304345
DG(20:5(5Z,8Z,11Z,14Z,17Z)/18:0/0:0)	MYO-INOSITOL	0.852014963
DG(20:2(11Z,14Z)/18:1(11Z)/0:0)	MYO-INOSITOL	0.838934979
CER(D18:1/25:0)	MYO-INOSITOL	0.856703943
DG(18:3(9Z,12Z,15Z)/22:4(7Z,10Z,13Z,16Z)/0:0)	MYO-INOSITOL	0.895281787
PC(P-16:0/P-18:1(11Z))	MYO-INOSITOL	0.800515707
PE(P-18:0/18:1(9Z))	MYO-INOSITOL	0.832274011
PC(P-18:1(9Z)/16:0)	MYO-INOSITOL	0.896700158
PC(20:3(8Z,11Z,14Z)/14:1(9Z))	MYO-INOSITOL	0.834117674
PENTAGASTRIN	MYO-INOSITOL	0.808411369
PE(14:1(9Z)/24:1(15Z))	MYO-INOSITOL	0.876602916
PG(18:0/18:1(9Z))	MYO-INOSITOL	0.828442492
PC(18:1(9Z)/18:3(9Z,12Z,15Z))	MYO-INOSITOL	0.817535457
SM(D16:1/24:1(15Z))	MYO-INOSITOL	0.835699216
PE(22:0/18:4(6Z,9Z,12Z,15Z))	MYO-INOSITOL	0.864332749
PC(P-18:0/20:1(11Z))	MYO-INOSITOL	0.825500934
PC(18:1(11Z)/20:4(8Z,11Z,14Z,17Z))	MYO-INOSITOL	0.865427306
PC(20:1(11Z)/18:4(6Z,9Z,12Z,15Z))	MYO-INOSITOL	0.883675643
PC(22:0/16:1(9Z))	MYO-INOSITOL	0.809724226
PC(22:0/P-18:1(11Z))	MYO-INOSITOL	0.808299571
TG(16:0/16:1(9Z)/18:2(9Z,12Z))	MYO-INOSITOL	0.828725037
PC(18:1(11Z)/22:1(13Z))	MYO-INOSITOL	0.823396363
PC(22:1(13Z)/18:1(9Z))	MYO-INOSITOL	0.862203762
PC(24:1(15Z)/16:0)	MYO-INOSITOL	0.855725544
PC(P-18:1(9Z)/24:0)	MYO-INOSITOL	0.800987958
TG(16:1(9Z)/16:1(9Z)/20:0)	MYO-INOSITOL	0.887426095
PC(20:4(5Z,8Z,11Z,14Z)/22:0)	MYO-INOSITOL	0.855936718
PI(20:2(11Z,14Z)/18:2(9Z,12Z))	MYO-INOSITOL	0.803760794
TG(18:1(9Z)/18:1(9Z)/20:0)	MYO-INOSITOL	0.813442757
TG(18:2(9Z,12Z)/20:0/20:0)	MYO-INOSITOL	0.80587611
3-METHYLADENINE	ALLO-INOSITOL	0.938092427
DEBRISOQUINE	ALLO-INOSITOL	0.996955326
CYSTEINYLGLYCINE	ALLO-INOSITOL	0.871837321
1-HYDROXYHEXANOYLGLYCINE	ALLO-INOSITOL	0.980340309
2,3-OCTADIENOYLGLYCINE	ALLO-INOSITOL	0.967302807
(S)-LIPOIC ACID	ALLO-INOSITOL	0.846445778
(R)-LIPOIC ACID	ALLO-INOSITOL	0.96957627
CARMUSTINE	ALLO-INOSITOL	0.819717192
1-HYDROXYOCT-2-ENOYLGLYCINE	ALLO-INOSITOL	0.810047786
7-HYDROXYOCT-7-ENOYLGLYCINE	ALLO-INOSITOL	0.965865447
GAMMA-GLUTAMYLALANINE	ALLO-INOSITOL	0.835544078
HEPTYL CYCLOHEXANE CARBOXYLIC ACID	ALLO-INOSITOL	0.97334335
TRIMETHYLSILYL NONANOIC ACID	ALLO-INOSITOL	0.886787409
2-HYDROXY-3-(SULFOOXY)BENZOIC ACID	ALLO-INOSITOL	0.835206204
1,11-UNDECANEDICARBOXYLIC ACID	ALLO-INOSITOL	0.811545995
ASPARTYLLYSINE	ALLO-INOSITOL	0.91080852
SPHINGOSINE	ALLO-INOSITOL	0.966104501
SERTRALINE	ALLO-INOSITOL	0.805830487
WARFARIN	ALLO-INOSITOL	0.971166005
REBOXETINE	ALLO-INOSITOL	0.984706746
8,9-EPOXYEICOSATRIENOIC ACID	ALLO-INOSITOL	0.81380915
15(S)-HYDROXYEICOSATRIENOIC ACID	ALLO-INOSITOL	0.828732472
6-(3-CARBOXY-2-HYDROXYPHENOXY)-3,4,5-TRIHYDROXYOXANE-2-CARBOXYLIC ACID	ALLO-INOSITOL	0.959110668
6-[4-(CARBOXYMETHYL)-2-HYDROXYPHENOXY]-3,4,5-TRIHYDROXYOXANE-2-CARBOXYLIC ACID	ALLO-INOSITOL	0.980051662
GREPAFLOXACIN	ALLO-INOSITOL	0.961754957
PROPANTHELINE	ALLO-INOSITOL	0.956611101
GENTIAN VIOLET	ALLO-INOSITOL	0.845077197
PRAZOSIN	ALLO-INOSITOL	0.818277271
DILTIAZEM	ALLO-INOSITOL	0.81639552
5-CIS-LYCOPENE	ALLO-INOSITOL	0.861907362
GAMMA-CAROTENE	ALLO-INOSITOL	0.913104833
NEUROSPORENE	ALLO-INOSITOL	0.978512846
DG(14:1(9Z)/16:0/0:0)	ALLO-INOSITOL	0.801453972
GADODIAMIDE	ALLO-INOSITOL	0.941412621
DG(18:2(9Z,12Z)/18:4(6Z,9Z,12Z,15Z)/0:0)	ALLO-INOSITOL	0.823941403
DG(14:1(9Z)/22:1(13Z)/0:0)	ALLO-INOSITOL	0.919677676
DG(20:0/18:2(9Z,12Z)/0:0)	ALLO-INOSITOL	0.919778223
DG(20:0/18:1(11Z)/0:0)	ALLO-INOSITOL	0.85514789
PC(18:3(9Z,12Z,15Z)/14:1(9Z))	ALLO-INOSITOL	0.975496908
PE(P-16:0/20:2(11Z,14Z))	ALLO-INOSITOL	0.803516746
PE(16:0/20:2(11Z,14Z))	ALLO-INOSITOL	0.97777812
PE(18:4(6Z,9Z,12Z,15Z)/22:0)	ALLO-INOSITOL	0.878591633
PIMECROLIMUS	ALLO-INOSITOL	0.818562053
PI(20:3(5Z,8Z,11Z)/20:3(5Z,8Z,11Z))	ALLO-INOSITOL	0.974875837
3-(2,4-DIHYDROXYPHENYL)PROPANOIC ACID	O-TYROSINE	0.824476978
MONOETHYL PHTHALATE	O-TYROSINE	0.852150287
TETRAETHYLENE GLYCOL	O-TYROSINE	0.810320131
1,4-OCTADIENOYLGLYCINE	O-TYROSINE	0.857288888
SEDOHEPTULOSE	O-TYROSINE	0.915037986
6-NONENOYLGLYCINE	O-TYROSINE	0.817964643
1-HYDROXYOCT-6-ENOYLGLYCINE	O-TYROSINE	0.859596536
6-HYDROXYOCT-4-ENOYLGLYCINE	O-TYROSINE	0.926148487
2-HYDROXYPHENYLPROPIONYLGLYCINE	O-TYROSINE	0.808276078
P-CHLOROBENZENE SULFONYL UREA	O-TYROSINE	0.816246785
RILUZOLE	O-TYROSINE	0.939779915
TRIPELENNAMINE	O-TYROSINE	0.824300469
METOPROLOL	O-TYROSINE	0.827022297
ENTECAVIR	O-TYROSINE	0.80564913
GLUTATHIONE	O-TYROSINE	0.830866006
8,9-EPOXYEICOSATRIENOIC ACID	O-TYROSINE	0.812596033
CYCLIC AMP	O-TYROSINE	0.948912989
6-(3-CARBOXY-5-HYDROXYPHENOXY)-3,4,5-TRIHYDROXYOXANE-2-CARBOXYLIC ACID	O-TYROSINE	0.91947303
GENTIAN VIOLET	O-TYROSINE	0.801835882
HEPTADECANOYL CARNITINE	O-TYROSINE	0.859547852
BENZTHIAZIDE	O-TYROSINE	0.805725383
RALOXIFENE	O-TYROSINE	0.813883765
CLOMOCYCLINE	O-TYROSINE	0.827626022
DG(20:2(11Z,14Z)/14:0/0:0)	O-TYROSINE	0.868536086
DG(20:2(11Z,14Z)/18:2(9Z,12Z)/0:0)	O-TYROSINE	0.828317154
PC(16:1(9Z)/14:1(9Z))	O-TYROSINE	0.839712246
PE(18:0/15:0)	O-TYROSINE	0.872848675
PC(18:1(11Z)/18:2(9Z,12Z))	O-TYROSINE	0.828306582
TG(16:0/16:1(9Z)/16:1(9Z))	O-TYROSINE	0.815823281
O-TYROSINE	3-(2,4-DIHYDROXYPHENYL)PROPANOIC ACID	0.824476978
MONOETHYL PHTHALATE	3-(2,4-DIHYDROXYPHENYL)PROPANOIC ACID	0.907567938
4-OCTENOYLGLYCINE	3-(2,4-DIHYDROXYPHENYL)PROPANOIC ACID	0.822989932
SEDOHEPTULOSE	3-(2,4-DIHYDROXYPHENYL)PROPANOIC ACID	0.809881628
6-NONENOYLGLYCINE	3-(2,4-DIHYDROXYPHENYL)PROPANOIC ACID	0.816973523
6-HYDROXYOCT-4-ENOYLGLYCINE	3-(2,4-DIHYDROXYPHENYL)PROPANOIC ACID	0.86506297
PORPHOBILINOGEN	3-(2,4-DIHYDROXYPHENYL)PROPANOIC ACID	0.810500587
RILUZOLE	3-(2,4-DIHYDROXYPHENYL)PROPANOIC ACID	0.881852776
TRIPELENNAMINE	3-(2,4-DIHYDROXYPHENYL)PROPANOIC ACID	0.829876522
ZOLMITRIPTAN	3-(2,4-DIHYDROXYPHENYL)PROPANOIC ACID	0.806326526
GLUTATHIONE	3-(2,4-DIHYDROXYPHENYL)PROPANOIC ACID	0.911157813
CYCLIC AMP	3-(2,4-DIHYDROXYPHENYL)PROPANOIC ACID	0.836316526
AMSACRINE	3-(2,4-DIHYDROXYPHENYL)PROPANOIC ACID	0.835837792
HEPTADECANOYL CARNITINE	3-(2,4-DIHYDROXYPHENYL)PROPANOIC ACID	0.808698809
RALOXIFENE	3-(2,4-DIHYDROXYPHENYL)PROPANOIC ACID	0.817422296
DG(20:2(11Z,14Z)/14:0/0:0)	3-(2,4-DIHYDROXYPHENYL)PROPANOIC ACID	0.873515076
DG(18:1(9Z)/18:1(9Z)/0:0)	3-(2,4-DIHYDROXYPHENYL)PROPANOIC ACID	0.81805303
DG(20:3(5Z,8Z,11Z)/20:4(8Z,11Z,14Z,17Z)/0:0)	3-(2,4-DIHYDROXYPHENYL)PROPANOIC ACID	0.822379682
PE(18:0/15:0)	3-(2,4-DIHYDROXYPHENYL)PROPANOIC ACID	0.814661973
TG(16:0/16:1(9Z)/16:1(9Z))	3-(2,4-DIHYDROXYPHENYL)PROPANOIC ACID	0.804171433
PC(18:0/22:0)	3-(2,4-DIHYDROXYPHENYL)PROPANOIC ACID	0.822213368
4-HYDROXYDEBRISOQUINE	VANYLGLYCOL	0.821855204
NABUMETONE	VANYLGLYCOL	0.80139237
EQUOL	VANYLGLYCOL	0.806656053
FRUCTOSE 6-PHOSPHATE	VANYLGLYCOL	0.847484272
DEOXYGUANOSINE	VANYLGLYCOL	0.838139773
BIOTIN SULFONE	VANYLGLYCOL	0.821310056
VALSARTAN	VANYLGLYCOL	0.825094502
5-METHYLTETRAHYDROFOLIC ACID	VANYLGLYCOL	0.881638109
GUANOSINE TRIPHOSPHATE	VANYLGLYCOL	0.820451208
DG(16:0/18:1(11Z)/0:0)	VANYLGLYCOL	0.816868866
DG(20:3(8Z,11Z,14Z)/20:4(5Z,8Z,11Z,14Z)/0:0)	VANYLGLYCOL	0.840526673
PC(14:0/18:3(6Z,9Z,12Z))	VANYLGLYCOL	0.845547862
PE(20:0/16:1(9Z))	VANYLGLYCOL	0.866731213
PC(20:3(8Z,11Z,14Z)/18:0)	VANYLGLYCOL	0.801503183
PC(18:1(9Z)/22:5(7Z,10Z,13Z,16Z,19Z))	VANYLGLYCOL	0.800923706
PC(20:3(8Z,11Z,14Z)/20:2(11Z,14Z))	VANYLGLYCOL	0.832454355
PC(16:1(9Z)/24:0)	VANYLGLYCOL	0.810274849
TG(16:1(9Z)/18:0/18:0)	VANYLGLYCOL	0.816514868
PC(18:0/24:0)	VANYLGLYCOL	0.850169543
PI(20:3(8Z,11Z,14Z)/20:3(5Z,8Z,11Z))	VANYLGLYCOL	0.808153164
TG(18:2(9Z,12Z)/20:0/20:1(11Z))	VANYLGLYCOL	0.807792868
TRIHEXOSYLCERAMIDE (D18:1/24:1(15Z))	VANYLGLYCOL	0.830158681
N-ACETYLVALINE	CARBIMAZOLE	0.857055331
L-FUCOSE	CARBIMAZOLE	0.935065689
MEXILETINE	CARBIMAZOLE	0.918104353
MONOMETHYL PHTHALATE	CARBIMAZOLE	0.988223265
4-AMINOHIPPURIC ACID	CARBIMAZOLE	0.844536185
ASYMMETRIC DIMETHYLARGININE	CARBIMAZOLE	0.901207638
5-NONENOYLGLYCINE	CARBIMAZOLE	0.826527743
5-HYDROXYPHENYLPROPIONYLGLYCINE	CARBIMAZOLE	0.955441644
NABUMETONE	CARBIMAZOLE	0.84012631
NALIDIXIC ACID	CARBIMAZOLE	0.885935197
DOPAMINE 4-SULFATE	CARBIMAZOLE	0.948845724
EQUOL	CARBIMAZOLE	0.81432737
STEARALDEHYDE	CARBIMAZOLE	0.802835699
BIOTIN SULFONE	CARBIMAZOLE	0.914707957
ENTECAVIR	CARBIMAZOLE	0.838537393
MORPHINE	CARBIMAZOLE	0.839434396
PIROXICAM	CARBIMAZOLE	0.826780217
PENTAMIDINE	CARBIMAZOLE	0.853064191
25-HYDROXYCHOLESTEROL	CARBIMAZOLE	0.851130478
BENDROFLUMETHIAZIDE	CARBIMAZOLE	0.814915815
RANOLAZINE	CARBIMAZOLE	0.819951684
ARACHIDONOYLCARNITINE	CARBIMAZOLE	0.806380904
5-METHYLTETRAHYDROFOLIC ACID	CARBIMAZOLE	0.840008419
GUANOSINE TRIPHOSPHATE	CARBIMAZOLE	0.821435987
DG(15:0/15:0/0:0)	CARBIMAZOLE	0.85928963
DG(18:1(11Z)/16:0/0:0)	CARBIMAZOLE	0.826049161
DG(18:0/18:3(9Z,12Z,15Z)/0:0)	CARBIMAZOLE	0.811401815
DG(14:0/22:1(13Z)/0:0)	CARBIMAZOLE	0.832428628
DG(20:5(5Z,8Z,11Z,14Z,17Z)/20:1(11Z)/0:0)	CARBIMAZOLE	0.839381827
PA(18:1(11Z)/18:1(11Z))	CARBIMAZOLE	0.804195158
PC(14:0/18:3(6Z,9Z,12Z))	CARBIMAZOLE	0.812502472
PC(14:1(9Z)/18:1(11Z))	CARBIMAZOLE	0.801722277
PE(20:0/16:1(9Z))	CARBIMAZOLE	0.823377408
PC(14:1(9Z)/20:3(8Z,11Z,14Z))	CARBIMAZOLE	0.890656268
PE(20:4(5Z,8Z,11Z,14Z)/20:0)	CARBIMAZOLE	0.809404609
PC(20:3(8Z,11Z,14Z)/18:0)	CARBIMAZOLE	0.817319654
PI(18:1(9Z)/18:1(9Z))	CARBIMAZOLE	0.804977257
PC(18:0/24:0)	CARBIMAZOLE	0.835353303
PI(18:2(9Z,12Z)/20:2(11Z,14Z))	CARBIMAZOLE	0.837217292
TG(16:0/18:2(9Z,12Z)/20:0)	CARBIMAZOLE	0.848907234
TG(18:0/18:1(9Z)/18:1(9Z))	CARBIMAZOLE	0.849264124
TG(18:0/18:0/20:1(11Z))	CARBIMAZOLE	0.876411469
TRIHEXOSYLCERAMIDE (D18:1/24:1(15Z))	CARBIMAZOLE	0.825556912
D-XYLULOSE	1,1-DIMETHYLETHYL HEPTANOIC ACID	0.838097631
1,5-ANHYDROSORBITOL	1,1-DIMETHYLETHYL HEPTANOIC ACID	0.958509768
GLUCOSAMINE	1,1-DIMETHYLETHYL HEPTANOIC ACID	0.93556557
2-HYDROXYDECANOATE	1,1-DIMETHYLETHYL HEPTANOIC ACID	0.958988861
CYSTATHIONINE KETIMINE	1,1-DIMETHYLETHYL HEPTANOIC ACID	0.854668779
N-PROPIONYLMETHIONINE	1,1-DIMETHYLETHYL HEPTANOIC ACID	0.908307442
PRAMIPEXOLE	1,1-DIMETHYLETHYL HEPTANOIC ACID	0.912477172
ISOLEUCYLPROLINE	1,1-DIMETHYLETHYL HEPTANOIC ACID	0.954794693
MELATONIN	1,1-DIMETHYLETHYL HEPTANOIC ACID	0.966380947
TICLOPIDINE	1,1-DIMETHYLETHYL HEPTANOIC ACID	0.853746239
FORMONONETIN	1,1-DIMETHYLETHYL HEPTANOIC ACID	0.89567469
SULFAMETHIZOLE	1,1-DIMETHYLETHYL HEPTANOIC ACID	0.960542643
N-PHENYLACETYLPHENYLALANINE	1,1-DIMETHYLETHYL HEPTANOIC ACID	0.868315733
4-HYDROXYESTRONE	1,1-DIMETHYLETHYL HEPTANOIC ACID	0.932574597
ETODOLAC	1,1-DIMETHYLETHYL HEPTANOIC ACID	0.946540424
QUERCETIN	1,1-DIMETHYLETHYL HEPTANOIC ACID	0.80818746
N-ACETYLNEURAMINIC ACID	1,1-DIMETHYLETHYL HEPTANOIC ACID	0.921994
18-HYDROXYARACHIDONIC ACID	1,1-DIMETHYLETHYL HEPTANOIC ACID	0.931120211
OLEOYLETHANOLAMIDE	1,1-DIMETHYLETHYL HEPTANOIC ACID	0.959962862
MG(16:0/0:0/0:0)	1,1-DIMETHYLETHYL HEPTANOIC ACID	0.878529578
DODECANOYLCARNITINE	1,1-DIMETHYLETHYL HEPTANOIC ACID	0.921114263
OMEPRAZOLE	1,1-DIMETHYLETHYL HEPTANOIC ACID	0.93378532
13,14-DIHYDRO-15-KETO PGF2A	1,1-DIMETHYLETHYL HEPTANOIC ACID	0.92768809
LYSOPE(15:0/0:0)	1,1-DIMETHYLETHYL HEPTANOIC ACID	0.909608297
DG(18:2(9Z,12Z)/14:1(9Z)/0:0)	1,1-DIMETHYLETHYL HEPTANOIC ACID	0.835730204
ZEAXANTHIN	1,1-DIMETHYLETHYL HEPTANOIC ACID	0.927727289
DG(18:2(9Z,12Z)/20:3(5Z,8Z,11Z)/0:0)	1,1-DIMETHYLETHYL HEPTANOIC ACID	0.900452552
PA(16:0/18:1(11Z))	1,1-DIMETHYLETHYL HEPTANOIC ACID	0.902369826
PC(15:0/15:0)	1,1-DIMETHYLETHYL HEPTANOIC ACID	0.964778889
PE(16:0/20:1(11Z))	1,1-DIMETHYLETHYL HEPTANOIC ACID	0.919527174
VINDESINE	1,1-DIMETHYLETHYL HEPTANOIC ACID	0.877232195
PC(P-18:1(9Z)/18:4(6Z,9Z,12Z,15Z))	1,1-DIMETHYLETHYL HEPTANOIC ACID	0.914389406
PG(18:2(9Z,12Z)/18:3(9Z,12Z,15Z))	1,1-DIMETHYLETHYL HEPTANOIC ACID	0.951420944
PC(22:4(7Z,10Z,13Z,16Z)/14:0)	1,1-DIMETHYLETHYL HEPTANOIC ACID	0.926953763
PC(18:1(11Z)/18:1(9Z))	1,1-DIMETHYLETHYL HEPTANOIC ACID	0.880941772
PE(22:4(7Z,10Z,13Z,16Z)/18:1(9Z))	1,1-DIMETHYLETHYL HEPTANOIC ACID	0.925997597
PC(P-18:1(9Z)/22:4(7Z,10Z,13Z,16Z))	1,1-DIMETHYLETHYL HEPTANOIC ACID	0.907459705
TG(16:1(9Z)/16:1(9Z)/18:2(9Z,12Z))	1,1-DIMETHYLETHYL HEPTANOIC ACID	0.899959347
PC(18:1(11Z)/22:2(13Z,16Z))	1,1-DIMETHYLETHYL HEPTANOIC ACID	0.955035828
PC(22:2(13Z,16Z)/20:4(8Z,11Z,14Z,17Z))	1,1-DIMETHYLETHYL HEPTANOIC ACID	0.962360852
PC(22:4(7Z,10Z,13Z,16Z)/20:1(11Z))	1,1-DIMETHYLETHYL HEPTANOIC ACID	0.965350146
PI(18:1(11Z)/20:3(5Z,8Z,11Z))	1,1-DIMETHYLETHYL HEPTANOIC ACID	0.971737989
1-METHYLADENINE	N1-ACETYLSPERMIDINE	0.91321843
PHENYLGLYOXYLIC ACID	N1-ACETYLSPERMIDINE	0.917580779
GUANIDINOSUCCINIC ACID	N1-ACETYLSPERMIDINE	0.952556079
SULFORAPHANE	N1-ACETYLSPERMIDINE	0.812809717
(R)-SALSOLINOL	N1-ACETYLSPERMIDINE	0.89487097
5-KETO-D-GLUCONATE	N1-ACETYLSPERMIDINE	0.876484095
4-AMINOHIPPURIC ACID	N1-ACETYLSPERMIDINE	0.926139981
TETRAETHYLENE GLYCOL	N1-ACETYLSPERMIDINE	0.905760404
1,3-DIMETHYLURIC ACID	N1-ACETYLSPERMIDINE	0.851928657
2,4-OCTADIENOYLGLYCINE	N1-ACETYLSPERMIDINE	0.800886846
(S)-LIPOIC ACID	N1-ACETYLSPERMIDINE	0.902255593
CARMUSTINE	N1-ACETYLSPERMIDINE	0.832597878
5-NONENOYLGLYCINE	N1-ACETYLSPERMIDINE	0.934628624
8-NONENOYLGLYCINE	N1-ACETYLSPERMIDINE	0.920147948
4-ALLYLPHENOL SULFATE	N1-ACETYLSPERMIDINE	0.850311666
1-HYDROXYOCT-3-ENOYLGLYCINE	N1-ACETYLSPERMIDINE	0.887742948
2-HYDROXYOCT-2-ENOYLGLYCINE	N1-ACETYLSPERMIDINE	0.890758058
6-HYDROXYOCT-1-ENOYLGLYCINE	N1-ACETYLSPERMIDINE	0.967890925
7-HYDROXYOCT-1-ENOYLGLYCINE	N1-ACETYLSPERMIDINE	0.85031429
GAMMA-GLUTAMYLALANINE	N1-ACETYLSPERMIDINE	0.83623954
TRIMETHYLSILYL NONANOIC ACID	N1-ACETYLSPERMIDINE	0.845565536
P-CHLOROBENZENE SULFONYL UREA	N1-ACETYLSPERMIDINE	0.955050766
EQUOL	N1-ACETYLSPERMIDINE	0.956497307
2-HYDROXYMYRISTIC ACID	N1-ACETYLSPERMIDINE	0.910561636
NOREPINEPHRINE SULFATE	N1-ACETYLSPERMIDINE	0.833414749
3,5-DIHYDROXY-4-(SULFOOXY)BENZOIC ACID	N1-ACETYLSPERMIDINE	0.903497889
1,2-BENZENEDIOL BIS(TRIMETHYLSILYL) ETHER	N1-ACETYLSPERMIDINE	0.868553452
KETOROLAC	N1-ACETYLSPERMIDINE	0.845935257
NICOTINIC ACID RIBONUCLEOSIDE	N1-ACETYLSPERMIDINE	0.956944945
FRUCTOSE 6-PHOSPHATE	N1-ACETYLSPERMIDINE	0.891487835
BIOTIN SULFONE	N1-ACETYLSPERMIDINE	0.801418415
AMITRIPTYLINE	N1-ACETYLSPERMIDINE	0.868128357
ISOVALERYLGLUCURONIDE	N1-ACETYLSPERMIDINE	0.834687901
13-CIS RETINOL	N1-ACETYLSPERMIDINE	0.923555273
CYPROHEPTADINE	N1-ACETYLSPERMIDINE	0.843029136
BRIMONIDINE	N1-ACETYLSPERMIDINE	0.928830461
8,9-EPOXYEICOSATRIENOIC ACID	N1-ACETYLSPERMIDINE	0.85621594
FAMCICLOVIR	N1-ACETYLSPERMIDINE	0.959170514
TORASEMIDE	N1-ACETYLSPERMIDINE	0.875711714
PROSTAGLANDIN F1A	N1-ACETYLSPERMIDINE	0.958662757
6-[3-(2-CARBOXYETHYL)-5-HYDROXYPHENOXY]-3,4,5-TRIHYDROXYOXANE-2-CARBOXYLIC ACID	N1-ACETYLSPERMIDINE	0.804990782
GENTIAN VIOLET	N1-ACETYLSPERMIDINE	0.806110138
ALFUZOSIN	N1-ACETYLSPERMIDINE	0.848538534
25-HYDROXYCHOLESTEROL	N1-ACETYLSPERMIDINE	0.806738909
MG(22:5(4Z,7Z,10Z,13Z,16Z)/0:0/0:0)	N1-ACETYLSPERMIDINE	0.80828436
OXICONAZOLE	N1-ACETYLSPERMIDINE	0.857286225
6-HYDROXYFLUVASTATIN	N1-ACETYLSPERMIDINE	0.804712762
RANOLAZINE	N1-ACETYLSPERMIDINE	0.908654132
BENZTHIAZIDE	N1-ACETYLSPERMIDINE	0.873674558
CANDESARTAN	N1-ACETYLSPERMIDINE	0.804219981
ARACHIDONOYLCARNITINE	N1-ACETYLSPERMIDINE	0.843494504
MASLINIC ACID	N1-ACETYLSPERMIDINE	0.865882186
DG(14:1(9Z)/16:1(9Z)/0:0)	N1-ACETYLSPERMIDINE	0.913153686
DG(15:0/15:0/0:0)	N1-ACETYLSPERMIDINE	0.828352316
DG(16:0/18:1(11Z)/0:0)	N1-ACETYLSPERMIDINE	0.917845419
DG(18:0/18:3(9Z,12Z,15Z)/0:0)	N1-ACETYLSPERMIDINE	0.816721575
DG(18:1(9Z)/18:1(9Z)/0:0)	N1-ACETYLSPERMIDINE	0.876754876
DG(20:3(5Z,8Z,11Z)/18:2(9Z,12Z)/0:0)	N1-ACETYLSPERMIDINE	0.899512089
DG(18:2(9Z,12Z)/20:0/0:0)	N1-ACETYLSPERMIDINE	0.903755286
DG(20:4(8Z,11Z,14Z,17Z)/20:2(11Z,14Z)/0:0)	N1-ACETYLSPERMIDINE	0.884034691
PC(16:1(9Z)/14:1(9Z))	N1-ACETYLSPERMIDINE	0.825067406
LACTO-N-TETRAOSE	N1-ACETYLSPERMIDINE	0.866482944
PC(14:0/P-18:1(11Z))	N1-ACETYLSPERMIDINE	0.820205732
PC(P-16:0/16:1(9Z))	N1-ACETYLSPERMIDINE	0.907018727
PE(P-16:0/20:2(11Z,14Z))	N1-ACETYLSPERMIDINE	0.812691175
PC(P-18:1(11Z)/16:1(9Z))	N1-ACETYLSPERMIDINE	0.929257185
PE(20:0/16:1(9Z))	N1-ACETYLSPERMIDINE	0.885638765
PG(18:1(9Z)/16:0)	N1-ACETYLSPERMIDINE	0.846460915
PC(14:1(9Z)/20:3(8Z,11Z,14Z))	N1-ACETYLSPERMIDINE	0.820157565
PE(20:3(5Z,8Z,11Z)/18:0)	N1-ACETYLSPERMIDINE	0.892160842
PC(14:1(9Z)/22:2(13Z,16Z))	N1-ACETYLSPERMIDINE	0.808407783
PE(20:4(5Z,8Z,11Z,14Z)/20:0)	N1-ACETYLSPERMIDINE	0.850547588
PG(18:2(9Z,12Z)/20:3(5Z,8Z,11Z))	N1-ACETYLSPERMIDINE	0.943953259
PC(P-18:1(9Z)/20:0)	N1-ACETYLSPERMIDINE	0.883368236
PC(20:5(5Z,8Z,11Z,14Z,17Z)/18:1(9Z))	N1-ACETYLSPERMIDINE	0.83935121
PC(20:5(5Z,8Z,11Z,14Z,17Z)/18:0)	N1-ACETYLSPERMIDINE	0.967215184
PC(20:3(8Z,11Z,14Z)/18:0)	N1-ACETYLSPERMIDINE	0.819252487
PC(20:3(8Z,11Z,14Z)/20:2(11Z,14Z))	N1-ACETYLSPERMIDINE	0.846504829
TG(16:0/18:2(9Z,12Z)/18:2(9Z,12Z))	N1-ACETYLSPERMIDINE	0.874657584
PI(18:1(11Z)/18:2(9Z,12Z))	N1-ACETYLSPERMIDINE	0.866123001
PC(20:1(11Z)/22:5(4Z,7Z,10Z,13Z,16Z))	N1-ACETYLSPERMIDINE	0.917419474
PC(18:0/24:0)	N1-ACETYLSPERMIDINE	0.834664433
PI(18:2(9Z,12Z)/20:2(11Z,14Z))	N1-ACETYLSPERMIDINE	0.818379967
TG(16:0/18:2(9Z,12Z)/20:0)	N1-ACETYLSPERMIDINE	0.800229977
TG(18:0/18:1(9Z)/18:1(9Z))	N1-ACETYLSPERMIDINE	0.800977448
PI(20:3(8Z,11Z,14Z)/20:3(5Z,8Z,11Z))	N1-ACETYLSPERMIDINE	0.858552193
TG(18:0/18:0/20:1(11Z))	N1-ACETYLSPERMIDINE	0.821769134
TG(18:2(9Z,12Z)/20:0/20:1(11Z))	N1-ACETYLSPERMIDINE	0.877090287
TRIHEXOSYLCERAMIDE (D18:1/24:1(15Z))	N1-ACETYLSPERMIDINE	0.839297629
S-(2-CARBOXYPROPYL)-CYSTEAMINE	N-ACETYLGLUTAMINE	0.867394201
PHENYLEPHRINE	N-ACETYLGLUTAMINE	0.943722135
ASCORBIC ACID	N-ACETYLGLUTAMINE	0.913077605
MYO-INOSITOL	N-ACETYLGLUTAMINE	0.819246312
D-THREO-ISOCITRIC ACID	N-ACETYLGLUTAMINE	0.921870884
GOLD	N-ACETYLGLUTAMINE	0.918649917
6,7-OCTADIENOYLGLYCINE	N-ACETYLGLUTAMINE	0.860608553
CLAVULANATE	N-ACETYLGLUTAMINE	0.949784237
GAMMA-GLUTAMYLGLYCINE	N-ACETYLGLUTAMINE	0.921608355
ETHAMBUTOL	N-ACETYLGLUTAMINE	0.934801496
METHYLDOPA	N-ACETYLGLUTAMINE	0.854237518
4-NONENOYLGLYCINE	N-ACETYLGLUTAMINE	0.960507634
METHYL BISNORBIOTINYL KETONE	N-ACETYLGLUTAMINE	0.853408343
2-HYDROXYOCT-1-ENOYLGLYCINE	N-ACETYLGLUTAMINE	0.92776043
7-HYDROXYOCT-5-ENOYLGLYCINE	N-ACETYLGLUTAMINE	0.895102495
MIGLUSTAT	N-ACETYLGLUTAMINE	0.922345178
N-ACETYLGALACTOSAMINE	N-ACETYLGLUTAMINE	0.870079531
3-HYDROXYPHENYLPROPIONYLGLYCINE	N-ACETYLGLUTAMINE	0.945260971
ERGOTHIONEINE	N-ACETYLGLUTAMINE	0.837553861
2,6-DI-TERT-BUTYL-4-HYDROXY-4-METHYL-2,5-CYCLOHEXADIENONE	N-ACETYLGLUTAMINE	0.821775507
URACIL MUSTARD	N-ACETYLGLUTAMINE	0.881834339
ACETYL-N-FORMYL-5-METHOXYKYNURENAMINE	N-ACETYLGLUTAMINE	0.941529202
5C-AGLYCONE	N-ACETYLGLUTAMINE	0.887647586
CIS-VACCENIC ACID	N-ACETYLGLUTAMINE	0.890275609
4-HYDROXY TOLBUTAMIDE	N-ACETYLGLUTAMINE	0.941923722
VERAPAMIL METABOLITE D-617	N-ACETYLGLUTAMINE	0.90020749
SUCCINYLCHOLINE	N-ACETYLGLUTAMINE	0.915062738
CISPLATIN	N-ACETYLGLUTAMINE	0.911035377
9-CIS-RETINOIC ACID	N-ACETYLGLUTAMINE	0.894878659
N,O-BIS- (TRIMETHYLSILYL)PHENYLALANINE	N-ACETYLGLUTAMINE	0.949825167
DESOGESTREL	N-ACETYLGLUTAMINE	0.891684528
6-(3-CARBOXYPHENOXY)-3,4,5-TRIHYDROXYOXANE-2-CARBOXYLIC ACID	N-ACETYLGLUTAMINE	0.863643262
OXYCODONE	N-ACETYLGLUTAMINE	0.918162188
MG(15:0/0:0/0:0)	N-ACETYLGLUTAMINE	0.826213035
DOLASETRON	N-ACETYLGLUTAMINE	0.974471783
FUROSEMIDE	N-ACETYLGLUTAMINE	0.96620392
CIPROFLOXACIN	N-ACETYLGLUTAMINE	0.851540724
GLYCEROPHOSPHOINOSITOL	N-ACETYLGLUTAMINE	0.953497615
NICOTINAMIDE RIBOTIDE	N-ACETYLGLUTAMINE	0.967986669
6-TRANS-12-EPI-LEUKOTRIENE B4	N-ACETYLGLUTAMINE	0.874654271
TENOXICAM	N-ACETYLGLUTAMINE	0.920032117
AICAR	N-ACETYLGLUTAMINE	0.822235074
R-138727	N-ACETYLGLUTAMINE	0.873576992
HALAZEPAM	N-ACETYLGLUTAMINE	0.888266233
MG(0:0/18:3(6Z,9Z,12Z)/0:0)	N-ACETYLGLUTAMINE	0.908734415
8-ISOPROSTAGLANDIN F2A	N-ACETYLGLUTAMINE	0.945977878
6,15-DIKETO,13,14-DIHYDRO-PGF1A	N-ACETYLGLUTAMINE	0.918952093
BORTEZOMIB	N-ACETYLGLUTAMINE	0.932598477
LYSOPA(P-16:0/0:0)	N-ACETYLGLUTAMINE	0.898241387
ALCLOMETASONE	N-ACETYLGLUTAMINE	0.936010745
BETA-TOCOPHEROL	N-ACETYLGLUTAMINE	0.947737714
ALPHA-TOCOTRIENOL	N-ACETYLGLUTAMINE	0.922658701
DICLOXACILLIN	N-ACETYLGLUTAMINE	0.950872864
CEFMETAZOLE	N-ACETYLGLUTAMINE	0.825844286
DG(16:1(9Z)/14:1(9Z)/0:0)	N-ACETYLGLUTAMINE	0.922336291
2',3'-ANHYDROLUTEIN	N-ACETYLGLUTAMINE	0.954838826
DG(14:1(9Z)/18:2(9Z,12Z)/0:0)	N-ACETYLGLUTAMINE	0.86832247
DG(14:0/18:1(9Z)/0:0)	N-ACETYLGLUTAMINE	0.91463113
DG(18:1(11Z)/14:0/0:0)	N-ACETYLGLUTAMINE	0.90513049
DG(14:0/18:0/0:0)	N-ACETYLGLUTAMINE	0.883721983
DG(18:3(6Z,9Z,12Z)/16:1(9Z)/0:0)	N-ACETYLGLUTAMINE	0.92307618
DG(20:4(5Z,8Z,11Z,14Z)/14:0/0:0)	N-ACETYLGLUTAMINE	0.80596949
UROBILINOGEN	N-ACETYLGLUTAMINE	0.92249057
DG(20:2(11Z,14Z)/14:1(9Z)/0:0)	N-ACETYLGLUTAMINE	0.956300212
DG(18:1(11Z)/16:1(9Z)/0:0)	N-ACETYLGLUTAMINE	0.898294458
DG(14:1(9Z)/20:0/0:0)	N-ACETYLGLUTAMINE	0.902602538
ASTAXANTHIN	N-ACETYLGLUTAMINE	0.947620291
LERCANIDIPINE	N-ACETYLGLUTAMINE	0.834407027
DG(20:3(8Z,11Z,14Z)/16:0/0:0)	N-ACETYLGLUTAMINE	0.947128744
DG(18:4(6Z,9Z,12Z,15Z)/20:2(11Z,14Z)/0:0)	N-ACETYLGLUTAMINE	0.95475583
DG(20:5(5Z,8Z,11Z,14Z,17Z)/18:0/0:0)	N-ACETYLGLUTAMINE	0.889514779
DG(20:1(11Z)/18:0/0:0)	N-ACETYLGLUTAMINE	0.917426806
CER(D18:1/25:0)	N-ACETYLGLUTAMINE	0.896744118
DG(18:3(9Z,12Z,15Z)/22:4(7Z,10Z,13Z,16Z)/0:0)	N-ACETYLGLUTAMINE	0.946864997
PE(P-16:0/18:2(9Z,12Z))	N-ACETYLGLUTAMINE	0.93269495
PC(P-18:1(11Z)/14:0)	N-ACETYLGLUTAMINE	0.88975119
PC(P-16:0/P-18:1(11Z))	N-ACETYLGLUTAMINE	0.921671405
PE(P-18:0/18:1(9Z))	N-ACETYLGLUTAMINE	0.926049134
PC(18:1(9Z)/14:0)	N-ACETYLGLUTAMINE	0.865907864
PC(P-18:1(9Z)/16:0)	N-ACETYLGLUTAMINE	0.936222213
GLCCER(D18:1/20:0)	N-ACETYLGLUTAMINE	0.904336148
PC(18:1(9Z)/16:0)	N-ACETYLGLUTAMINE	0.895955529
PC(P-18:1(9Z)/18:3(9Z,12Z,15Z))	N-ACETYLGLUTAMINE	0.814803406
PENTAGASTRIN	N-ACETYLGLUTAMINE	0.923210528
PE(14:1(9Z)/24:1(15Z))	N-ACETYLGLUTAMINE	0.895647729
PE(20:1(11Z)/18:0)	N-ACETYLGLUTAMINE	0.861868257
PG(18:0/18:1(9Z))	N-ACETYLGLUTAMINE	0.959250484
PC(18:3(6Z,9Z,12Z)/18:3(9Z,12Z,15Z))	N-ACETYLGLUTAMINE	0.925598388
SM(D16:1/24:1(15Z))	N-ACETYLGLUTAMINE	0.963127552
PE(22:0/18:4(6Z,9Z,12Z,15Z))	N-ACETYLGLUTAMINE	0.934346526
PC(18:2(9Z,12Z)/20:4(5Z,8Z,11Z,14Z))	N-ACETYLGLUTAMINE	0.942897893
PC(20:1(11Z)/18:4(6Z,9Z,12Z,15Z))	N-ACETYLGLUTAMINE	0.930028018
PC(22:0/P-18:1(11Z))	N-ACETYLGLUTAMINE	0.917451177
TG(16:0/16:1(9Z)/18:2(9Z,12Z))	N-ACETYLGLUTAMINE	0.935142825
PC(20:0/20:4(8Z,11Z,14Z,17Z))	N-ACETYLGLUTAMINE	0.942611064
PC(18:1(11Z)/22:1(13Z))	N-ACETYLGLUTAMINE	0.944046082
PC(22:1(13Z)/18:1(9Z))	N-ACETYLGLUTAMINE	0.971747252
PC(24:1(15Z)/16:0)	N-ACETYLGLUTAMINE	0.93713244
TG(16:1(9Z)/16:1(9Z)/20:0)	N-ACETYLGLUTAMINE	0.947568036
PC(22:2(13Z,16Z)/20:4(5Z,8Z,11Z,14Z))	N-ACETYLGLUTAMINE	0.944279422
PC(20:4(5Z,8Z,11Z,14Z)/22:0)	N-ACETYLGLUTAMINE	0.955804294
PC(20:1(11Z)/22:1(13Z))	N-ACETYLGLUTAMINE	0.866166351
PI(20:2(11Z,14Z)/18:2(9Z,12Z))	N-ACETYLGLUTAMINE	0.952322008
PI(18:1(9Z)/20:1(11Z))	N-ACETYLGLUTAMINE	0.855562237
TG(16:1(9Z)/20:1(11Z)/20:4(5Z,8Z,11Z,14Z))	N-ACETYLGLUTAMINE	0.898809461
PI(22:5(7Z,10Z,13Z,16Z,19Z)/18:0)	N-ACETYLGLUTAMINE	0.858683618
TG(18:1(9Z)/18:1(9Z)/20:0)	N-ACETYLGLUTAMINE	0.926751949
TG(18:2(9Z,12Z)/20:0/20:0)	N-ACETYLGLUTAMINE	0.950184361
HEPTAGLUTAMYL FOLIC ACID	N-ACETYLGLUTAMINE	0.914282817
D-XYLULOSE	2-HYDROXYDECANOATE	0.81650029
1,5-ANHYDROSORBITOL	2-HYDROXYDECANOATE	0.909208818
GLUCOSAMINE	2-HYDROXYDECANOATE	0.904236308
1,1-DIMETHYLETHYL HEPTANOIC ACID	2-HYDROXYDECANOATE	0.958988861
CYSTATHIONINE KETIMINE	2-HYDROXYDECANOATE	0.857813426
N-PROPIONYLMETHIONINE	2-HYDROXYDECANOATE	0.893424611
PRAMIPEXOLE	2-HYDROXYDECANOATE	0.928004713
ISOLEUCYLPROLINE	2-HYDROXYDECANOATE	0.922850333
MELATONIN	2-HYDROXYDECANOATE	0.937752699
TICLOPIDINE	2-HYDROXYDECANOATE	0.853897958
FORMONONETIN	2-HYDROXYDECANOATE	0.861145719
SULFAMETHIZOLE	2-HYDROXYDECANOATE	0.92226112
N-PHENYLACETYLPHENYLALANINE	2-HYDROXYDECANOATE	0.901825669
4-HYDROXYESTRONE	2-HYDROXYDECANOATE	0.905759395
ETODOLAC	2-HYDROXYDECANOATE	0.911497822
QUERCETIN	2-HYDROXYDECANOATE	0.832312959
N-ACETYLNEURAMINIC ACID	2-HYDROXYDECANOATE	0.94100416
18-HYDROXYARACHIDONIC ACID	2-HYDROXYDECANOATE	0.897970717
OLEOYLETHANOLAMIDE	2-HYDROXYDECANOATE	0.931422955
MG(16:0/0:0/0:0)	2-HYDROXYDECANOATE	0.867646496
DODECANOYLCARNITINE	2-HYDROXYDECANOATE	0.908780131
OMEPRAZOLE	2-HYDROXYDECANOATE	0.908164848
13,14-DIHYDRO-15-KETO PGF2A	2-HYDROXYDECANOATE	0.923310124
LYSOPE(15:0/0:0)	2-HYDROXYDECANOATE	0.861277847
DG(18:2(9Z,12Z)/14:1(9Z)/0:0)	2-HYDROXYDECANOATE	0.878484973
ZEAXANTHIN	2-HYDROXYDECANOATE	0.887608439
DG(18:2(9Z,12Z)/20:3(5Z,8Z,11Z)/0:0)	2-HYDROXYDECANOATE	0.904461027
PA(16:0/18:1(11Z))	2-HYDROXYDECANOATE	0.898187209
PC(15:0/15:0)	2-HYDROXYDECANOATE	0.952128999
PE(16:0/20:1(11Z))	2-HYDROXYDECANOATE	0.888578709
VINDESINE	2-HYDROXYDECANOATE	0.861138411
PC(P-18:1(9Z)/18:4(6Z,9Z,12Z,15Z))	2-HYDROXYDECANOATE	0.887724474
PG(18:2(9Z,12Z)/18:3(9Z,12Z,15Z))	2-HYDROXYDECANOATE	0.933479356
PC(22:4(7Z,10Z,13Z,16Z)/14:0)	2-HYDROXYDECANOATE	0.916851222
PC(18:1(11Z)/18:1(9Z))	2-HYDROXYDECANOATE	0.866398183
PE(22:4(7Z,10Z,13Z,16Z)/18:1(9Z))	2-HYDROXYDECANOATE	0.919137213
PC(P-18:1(9Z)/22:4(7Z,10Z,13Z,16Z))	2-HYDROXYDECANOATE	0.893500228
TG(16:1(9Z)/16:1(9Z)/18:2(9Z,12Z))	2-HYDROXYDECANOATE	0.886874426
PC(18:1(11Z)/22:2(13Z,16Z))	2-HYDROXYDECANOATE	0.934649439
PC(22:2(13Z,16Z)/20:4(8Z,11Z,14Z,17Z))	2-HYDROXYDECANOATE	0.935568083
PC(22:4(7Z,10Z,13Z,16Z)/20:1(11Z))	2-HYDROXYDECANOATE	0.940948382
PI(18:1(11Z)/20:3(5Z,8Z,11Z))	2-HYDROXYDECANOATE	0.946587952
3-METHYLADENINE	1-HYDROXYHEXANOYLGLYCINE	0.945066807
DEBRISOQUINE	1-HYDROXYHEXANOYLGLYCINE	0.981658811
CYSTEINYLGLYCINE	1-HYDROXYHEXANOYLGLYCINE	0.849481027
ALLO-INOSITOL	1-HYDROXYHEXANOYLGLYCINE	0.980340309
2,3-OCTADIENOYLGLYCINE	1-HYDROXYHEXANOYLGLYCINE	0.959791625
(S)-LIPOIC ACID	1-HYDROXYHEXANOYLGLYCINE	0.827056753
(R)-LIPOIC ACID	1-HYDROXYHEXANOYLGLYCINE	0.962138671
CARMUSTINE	1-HYDROXYHEXANOYLGLYCINE	0.813860698
GUANADREL	1-HYDROXYHEXANOYLGLYCINE	0.8090413
7-HYDROXYOCT-7-ENOYLGLYCINE	1-HYDROXYHEXANOYLGLYCINE	0.943762235
GAMMA-GLUTAMYLALANINE	1-HYDROXYHEXANOYLGLYCINE	0.847383071
HEPTYL CYCLOHEXANE CARBOXYLIC ACID	1-HYDROXYHEXANOYLGLYCINE	0.9573755
TRIMETHYLSILYL NONANOIC ACID	1-HYDROXYHEXANOYLGLYCINE	0.892071541
2-HYDROXY-3-(SULFOOXY)BENZOIC ACID	1-HYDROXYHEXANOYLGLYCINE	0.86913166
1,11-UNDECANEDICARBOXYLIC ACID	1-HYDROXYHEXANOYLGLYCINE	0.823383495
ASPARTYLLYSINE	1-HYDROXYHEXANOYLGLYCINE	0.913776532
SPHINGOSINE	1-HYDROXYHEXANOYLGLYCINE	0.944524055
SERTRALINE	1-HYDROXYHEXANOYLGLYCINE	0.806263963
WARFARIN	1-HYDROXYHEXANOYLGLYCINE	0.947604945
REBOXETINE	1-HYDROXYHEXANOYLGLYCINE	0.970017049
15(S)-HYDROXYEICOSATRIENOIC ACID	1-HYDROXYHEXANOYLGLYCINE	0.816333584
6-(3-CARBOXY-2-HYDROXYPHENOXY)-3,4,5-TRIHYDROXYOXANE-2-CARBOXYLIC ACID	1-HYDROXYHEXANOYLGLYCINE	0.940611609
6-[4-(CARBOXYMETHYL)-2-HYDROXYPHENOXY]-3,4,5-TRIHYDROXYOXANE-2-CARBOXYLIC ACID	1-HYDROXYHEXANOYLGLYCINE	0.957317895
GREPAFLOXACIN	1-HYDROXYHEXANOYLGLYCINE	0.950293643
PROPANTHELINE	1-HYDROXYHEXANOYLGLYCINE	0.951052054
GENTIAN VIOLET	1-HYDROXYHEXANOYLGLYCINE	0.85433227
DILTIAZEM	1-HYDROXYHEXANOYLGLYCINE	0.849222503
5-CIS-LYCOPENE	1-HYDROXYHEXANOYLGLYCINE	0.874727089
GAMMA-CAROTENE	1-HYDROXYHEXANOYLGLYCINE	0.90623524
NEUROSPORENE	1-HYDROXYHEXANOYLGLYCINE	0.960609233
GADODIAMIDE	1-HYDROXYHEXANOYLGLYCINE	0.935423785
DG(18:2(9Z,12Z)/18:4(6Z,9Z,12Z,15Z)/0:0)	1-HYDROXYHEXANOYLGLYCINE	0.847137094
DG(14:1(9Z)/22:1(13Z)/0:0)	1-HYDROXYHEXANOYLGLYCINE	0.914922456
DG(20:0/18:2(9Z,12Z)/0:0)	1-HYDROXYHEXANOYLGLYCINE	0.894662743
DG(20:0/18:1(11Z)/0:0)	1-HYDROXYHEXANOYLGLYCINE	0.817212738
PC(18:3(9Z,12Z,15Z)/14:1(9Z))	1-HYDROXYHEXANOYLGLYCINE	0.944564285
PE(P-16:0/20:2(11Z,14Z))	1-HYDROXYHEXANOYLGLYCINE	0.804262652
PE(16:0/20:2(11Z,14Z))	1-HYDROXYHEXANOYLGLYCINE	0.947594796
PE(18:4(6Z,9Z,12Z,15Z)/22:0)	1-HYDROXYHEXANOYLGLYCINE	0.883657747
PIMECROLIMUS	1-HYDROXYHEXANOYLGLYCINE	0.834623675
PI(20:3(5Z,8Z,11Z)/20:3(5Z,8Z,11Z))	1-HYDROXYHEXANOYLGLYCINE	0.960940413
5-HYDROXYOCT-1-ENOYLGLYCINE	DIAMINOPIMELIC ACID	0.843801508
TRIPELENNAMINE	DIAMINOPIMELIC ACID	0.824546138
DG(22:5(4Z,7Z,10Z,13Z,16Z)/16:1(9Z)/0:0)	DIAMINOPIMELIC ACID	0.816209048
DG(22:4(7Z,10Z,13Z,16Z)/16:0/0:0)	DIAMINOPIMELIC ACID	0.810234251
D-GLUCOSE	1,4-BIS-(1,1-DIMETHYLETHYL)-BENZENE	0.956419766
1,3-DIMETHYLURIC ACID	1,4-BIS-(1,1-DIMETHYLETHYL)-BENZENE	0.816941606
1,4-OCTADIENOYLGLYCINE	1,4-BIS-(1,1-DIMETHYLETHYL)-BENZENE	0.880493743
1,7-OCTADIENOYLGLYCINE	1,4-BIS-(1,1-DIMETHYLETHYL)-BENZENE	0.969609446
1-HYDROXYOCT-2-ENOYLGLYCINE	1,4-BIS-(1,1-DIMETHYLETHYL)-BENZENE	0.949387065
2-HYDROXYPHENYLPROPIONYLGLYCINE	1,4-BIS-(1,1-DIMETHYLETHYL)-BENZENE	0.910323659
2-[4-HYDROXY-3-(SULFOOXY)PHENYL]ACETIC ACID	1,4-BIS-(1,1-DIMETHYLETHYL)-BENZENE	0.816227009
NOREPINEPHRINE SULFATE	1,4-BIS-(1,1-DIMETHYLETHYL)-BENZENE	0.903614947
KETOROLAC	1,4-BIS-(1,1-DIMETHYLETHYL)-BENZENE	0.843174083
ETHOXZOLAMIDE	1,4-BIS-(1,1-DIMETHYLETHYL)-BENZENE	0.819556864
METOPROLOL	1,4-BIS-(1,1-DIMETHYLETHYL)-BENZENE	0.901961973
LUTEOLIN	1,4-BIS-(1,1-DIMETHYLETHYL)-BENZENE	0.817699391
CYPROHEPTADINE	1,4-BIS-(1,1-DIMETHYLETHYL)-BENZENE	0.94100473
FLUOXETINE	1,4-BIS-(1,1-DIMETHYLETHYL)-BENZENE	0.827210634
8,9-EPOXYEICOSATRIENOIC ACID	1,4-BIS-(1,1-DIMETHYLETHYL)-BENZENE	0.91178731
PRAZOSIN	1,4-BIS-(1,1-DIMETHYLETHYL)-BENZENE	0.973004788
6-HYDROXYFLUVASTATIN	1,4-BIS-(1,1-DIMETHYLETHYL)-BENZENE	0.895143582
BENZTHIAZIDE	1,4-BIS-(1,1-DIMETHYLETHYL)-BENZENE	0.923918859
CLOMOCYCLINE	1,4-BIS-(1,1-DIMETHYLETHYL)-BENZENE	0.922546608
DG(14:1(9Z)/16:1(9Z)/0:0)	1,4-BIS-(1,1-DIMETHYLETHYL)-BENZENE	0.859562062
DG(14:1(9Z)/16:0/0:0)	1,4-BIS-(1,1-DIMETHYLETHYL)-BENZENE	0.829513121
HEME	1,4-BIS-(1,1-DIMETHYLETHYL)-BENZENE	0.827273987
DG(20:2(11Z,14Z)/18:2(9Z,12Z)/0:0)	1,4-BIS-(1,1-DIMETHYLETHYL)-BENZENE	0.924895339
DG(20:0/18:1(11Z)/0:0)	1,4-BIS-(1,1-DIMETHYLETHYL)-BENZENE	0.965464487
DG(20:4(8Z,11Z,14Z,17Z)/20:2(11Z,14Z)/0:0)	1,4-BIS-(1,1-DIMETHYLETHYL)-BENZENE	0.903696459
PE(P-16:0/20:2(11Z,14Z))	1,4-BIS-(1,1-DIMETHYLETHYL)-BENZENE	0.819904485
PC(18:4(6Z,9Z,12Z,15Z)/16:0)	1,4-BIS-(1,1-DIMETHYLETHYL)-BENZENE	0.803621221
PC(18:1(11Z)/18:2(9Z,12Z))	1,4-BIS-(1,1-DIMETHYLETHYL)-BENZENE	0.922830219
PC(22:1(13Z)/14:0)	1,4-BIS-(1,1-DIMETHYLETHYL)-BENZENE	0.818817584
PI(18:0/22:4(7Z,10Z,13Z,16Z))	1,4-BIS-(1,1-DIMETHYLETHYL)-BENZENE	0.811984483
TG(20:1(11Z)/20:1(11Z)/20:4(5Z,8Z,11Z,14Z))	1,4-BIS-(1,1-DIMETHYLETHYL)-BENZENE	0.815355218
TRIHEXOSYLCERAMIDE (D18:1/16:0)	1,4-BIS-(1,1-DIMETHYLETHYL)-BENZENE	0.806731905
MONOISOBUTYL PHTHALIC ACID	5-METHOXYTRYPTOPHOL	0.982463243
13-CIS RETINOL	5-METHOXYTRYPTOPHOL	0.806119481
VANYLGLYCOL	4-HYDROXYDEBRISOQUINE	0.821855204
S-(2-CARBOXYPROPYL)-CYSTEAMINE	D-THREO-ISOCITRIC ACID	0.950928281
PHENYLEPHRINE	D-THREO-ISOCITRIC ACID	0.910223764
ASCORBIC ACID	D-THREO-ISOCITRIC ACID	0.894637667
MYO-INOSITOL	D-THREO-ISOCITRIC ACID	0.813988562
N-ACETYLGLUTAMINE	D-THREO-ISOCITRIC ACID	0.921870884
GOLD	D-THREO-ISOCITRIC ACID	0.941628539
CLAVULANATE	D-THREO-ISOCITRIC ACID	0.938838481
GAMMA-GLUTAMYLGLYCINE	D-THREO-ISOCITRIC ACID	0.821965908
ETHAMBUTOL	D-THREO-ISOCITRIC ACID	0.903425227
METHYLDOPA	D-THREO-ISOCITRIC ACID	0.81023632
4-NONENOYLGLYCINE	D-THREO-ISOCITRIC ACID	0.942015201
METHYL BISNORBIOTINYL KETONE	D-THREO-ISOCITRIC ACID	0.864803919
2-HYDROXYOCT-1-ENOYLGLYCINE	D-THREO-ISOCITRIC ACID	0.888345299
7-HYDROXYOCT-5-ENOYLGLYCINE	D-THREO-ISOCITRIC ACID	0.830442608
MIGLUSTAT	D-THREO-ISOCITRIC ACID	0.967457017
N-ACETYLGALACTOSAMINE	D-THREO-ISOCITRIC ACID	0.884782692
3-HYDROXYPHENYLPROPIONYLGLYCINE	D-THREO-ISOCITRIC ACID	0.896056569
ERGOTHIONEINE	D-THREO-ISOCITRIC ACID	0.850143188
2,6-DI-TERT-BUTYL-4-HYDROXY-4-METHYL-2,5-CYCLOHEXADIENONE	D-THREO-ISOCITRIC ACID	0.831283664
URACIL MUSTARD	D-THREO-ISOCITRIC ACID	0.811533279
ACETYL-N-FORMYL-5-METHOXYKYNURENAMINE	D-THREO-ISOCITRIC ACID	0.918695568
5C-AGLYCONE	D-THREO-ISOCITRIC ACID	0.865591103
CIS-VACCENIC ACID	D-THREO-ISOCITRIC ACID	0.825889718
4-HYDROXY TOLBUTAMIDE	D-THREO-ISOCITRIC ACID	0.922136122
VERAPAMIL METABOLITE D-617	D-THREO-ISOCITRIC ACID	0.817987342
SUCCINYLCHOLINE	D-THREO-ISOCITRIC ACID	0.824621887
CISPLATIN	D-THREO-ISOCITRIC ACID	0.840114222
9-CIS-RETINOIC ACID	D-THREO-ISOCITRIC ACID	0.848918472
N,O-BIS- (TRIMETHYLSILYL)PHENYLALANINE	D-THREO-ISOCITRIC ACID	0.933258916
DESOGESTREL	D-THREO-ISOCITRIC ACID	0.863453327
6-(3-CARBOXYPHENOXY)-3,4,5-TRIHYDROXYOXANE-2-CARBOXYLIC ACID	D-THREO-ISOCITRIC ACID	0.905943964
OXYCODONE	D-THREO-ISOCITRIC ACID	0.890123789
DOLASETRON	D-THREO-ISOCITRIC ACID	0.951469439
FUROSEMIDE	D-THREO-ISOCITRIC ACID	0.924820192
CIPROFLOXACIN	D-THREO-ISOCITRIC ACID	0.907104452
GLYCEROPHOSPHOINOSITOL	D-THREO-ISOCITRIC ACID	0.954808976
NICOTINAMIDE RIBOTIDE	D-THREO-ISOCITRIC ACID	0.941512425
6-TRANS-12-EPI-LEUKOTRIENE B4	D-THREO-ISOCITRIC ACID	0.938337774
TENOXICAM	D-THREO-ISOCITRIC ACID	0.940404129
R-138727	D-THREO-ISOCITRIC ACID	0.874981739
HALAZEPAM	D-THREO-ISOCITRIC ACID	0.932741035
MG(0:0/18:3(6Z,9Z,12Z)/0:0)	D-THREO-ISOCITRIC ACID	0.879366846
8-ISOPROSTAGLANDIN F2A	D-THREO-ISOCITRIC ACID	0.952303408
6,15-DIKETO,13,14-DIHYDRO-PGF1A	D-THREO-ISOCITRIC ACID	0.875373668
BORTEZOMIB	D-THREO-ISOCITRIC ACID	0.882282292
LYSOPA(P-16:0/0:0)	D-THREO-ISOCITRIC ACID	0.825388239
ALCLOMETASONE	D-THREO-ISOCITRIC ACID	0.872488112
MG(0:0/22:1(13Z)/0:0)	D-THREO-ISOCITRIC ACID	0.800076948
BETA-TOCOPHEROL	D-THREO-ISOCITRIC ACID	0.957126612
ALPHA-TOCOTRIENOL	D-THREO-ISOCITRIC ACID	0.90382574
DICLOXACILLIN	D-THREO-ISOCITRIC ACID	0.974087425
CEFMETAZOLE	D-THREO-ISOCITRIC ACID	0.865143889
DG(16:1(9Z)/14:1(9Z)/0:0)	D-THREO-ISOCITRIC ACID	0.957979973
2',3'-ANHYDROLUTEIN	D-THREO-ISOCITRIC ACID	0.928160016
DG(14:1(9Z)/18:2(9Z,12Z)/0:0)	D-THREO-ISOCITRIC ACID	0.93412986
DG(14:0/18:1(9Z)/0:0)	D-THREO-ISOCITRIC ACID	0.86737561
DG(18:1(11Z)/14:0/0:0)	D-THREO-ISOCITRIC ACID	0.840553627
DG(14:0/18:0/0:0)	D-THREO-ISOCITRIC ACID	0.90446262
DG(18:3(6Z,9Z,12Z)/16:1(9Z)/0:0)	D-THREO-ISOCITRIC ACID	0.975079972
UROBILINOGEN	D-THREO-ISOCITRIC ACID	0.87272299
DG(20:2(11Z,14Z)/14:1(9Z)/0:0)	D-THREO-ISOCITRIC ACID	0.946282005
DG(18:1(11Z)/16:1(9Z)/0:0)	D-THREO-ISOCITRIC ACID	0.890883792
DG(14:1(9Z)/20:0/0:0)	D-THREO-ISOCITRIC ACID	0.958359096
ASTAXANTHIN	D-THREO-ISOCITRIC ACID	0.959185411
LERCANIDIPINE	D-THREO-ISOCITRIC ACID	0.886200862
DG(20:3(8Z,11Z,14Z)/16:0/0:0)	D-THREO-ISOCITRIC ACID	0.965656584
DG(18:4(6Z,9Z,12Z,15Z)/20:2(11Z,14Z)/0:0)	D-THREO-ISOCITRIC ACID	0.942101276
DG(20:1(11Z)/18:0/0:0)	D-THREO-ISOCITRIC ACID	0.903564679
CER(D18:1/25:0)	D-THREO-ISOCITRIC ACID	0.853223793
DG(18:3(9Z,12Z,15Z)/22:4(7Z,10Z,13Z,16Z)/0:0)	D-THREO-ISOCITRIC ACID	0.924270969
PE(P-16:0/18:2(9Z,12Z))	D-THREO-ISOCITRIC ACID	0.91551676
PC(P-18:1(11Z)/14:0)	D-THREO-ISOCITRIC ACID	0.921453718
PC(P-16:0/P-18:1(11Z))	D-THREO-ISOCITRIC ACID	0.922131835
PE(P-18:0/18:1(9Z))	D-THREO-ISOCITRIC ACID	0.937869561
PC(18:1(9Z)/14:0)	D-THREO-ISOCITRIC ACID	0.900435083
PC(P-18:1(9Z)/16:0)	D-THREO-ISOCITRIC ACID	0.914989143
PC(18:2(9Z,12Z)/16:1(9Z))	D-THREO-ISOCITRIC ACID	0.808946074
GLCCER(D18:1/20:0)	D-THREO-ISOCITRIC ACID	0.900993771
PC(16:0/18:1(9Z))	D-THREO-ISOCITRIC ACID	0.840878909
PC(18:1(9Z)/16:0)	D-THREO-ISOCITRIC ACID	0.862753343
PC(P-18:1(9Z)/18:3(9Z,12Z,15Z))	D-THREO-ISOCITRIC ACID	0.804368669
PENTAGASTRIN	D-THREO-ISOCITRIC ACID	0.893026207
PE(14:1(9Z)/24:1(15Z))	D-THREO-ISOCITRIC ACID	0.898288247
PE(20:1(11Z)/18:0)	D-THREO-ISOCITRIC ACID	0.831431729
PG(18:0/18:1(9Z))	D-THREO-ISOCITRIC ACID	0.953826049
PC(18:3(6Z,9Z,12Z)/18:3(9Z,12Z,15Z))	D-THREO-ISOCITRIC ACID	0.911398769
SM(D16:1/24:1(15Z))	D-THREO-ISOCITRIC ACID	0.923757348
PC(22:2(13Z,16Z)/14:0)	D-THREO-ISOCITRIC ACID	0.815862012
PE(22:0/18:4(6Z,9Z,12Z,15Z))	D-THREO-ISOCITRIC ACID	0.90123935
PC(18:2(9Z,12Z)/20:4(5Z,8Z,11Z,14Z))	D-THREO-ISOCITRIC ACID	0.955324641
PC(20:1(11Z)/18:4(6Z,9Z,12Z,15Z))	D-THREO-ISOCITRIC ACID	0.86827448
PC(22:0/16:1(9Z))	D-THREO-ISOCITRIC ACID	0.800532597
PC(P-18:1(9Z)/22:5(4Z,7Z,10Z,13Z,16Z))	D-THREO-ISOCITRIC ACID	0.80917504
PC(22:0/P-18:1(11Z))	D-THREO-ISOCITRIC ACID	0.849602553
TG(16:0/16:1(9Z)/18:2(9Z,12Z))	D-THREO-ISOCITRIC ACID	0.879111104
PC(20:5(5Z,8Z,11Z,14Z,17Z)/20:0)	D-THREO-ISOCITRIC ACID	0.914689967
PC(20:0/20:4(8Z,11Z,14Z,17Z))	D-THREO-ISOCITRIC ACID	0.959774184
PC(18:1(11Z)/22:1(13Z))	D-THREO-ISOCITRIC ACID	0.879122013
PC(22:1(13Z)/18:1(9Z))	D-THREO-ISOCITRIC ACID	0.948384318
PC(24:1(15Z)/16:0)	D-THREO-ISOCITRIC ACID	0.915977306
PC(P-18:1(9Z)/24:0)	D-THREO-ISOCITRIC ACID	0.851744499
TG(16:1(9Z)/16:1(9Z)/20:0)	D-THREO-ISOCITRIC ACID	0.90745034
PC(22:2(13Z,16Z)/20:4(5Z,8Z,11Z,14Z))	D-THREO-ISOCITRIC ACID	0.974265797
PC(20:4(5Z,8Z,11Z,14Z)/22:0)	D-THREO-ISOCITRIC ACID	0.940352683
PC(20:1(11Z)/22:1(13Z))	D-THREO-ISOCITRIC ACID	0.865593717
PI(20:2(11Z,14Z)/18:2(9Z,12Z))	D-THREO-ISOCITRIC ACID	0.917975188
TG(16:1(9Z)/18:0/20:1(11Z))	D-THREO-ISOCITRIC ACID	0.80688393
TG(16:1(9Z)/20:1(11Z)/20:4(5Z,8Z,11Z,14Z))	D-THREO-ISOCITRIC ACID	0.856198677
TG(18:1(9Z)/18:1(9Z)/20:0)	D-THREO-ISOCITRIC ACID	0.912523603
TG(18:2(9Z,12Z)/20:0/20:0)	D-THREO-ISOCITRIC ACID	0.929301641
HEPTAGLUTAMYL FOLIC ACID	D-THREO-ISOCITRIC ACID	0.93397773
1-METHYLADENINE	5-KETO-D-GLUCONATE	0.828875791
4-METHOXYPHENYLACETIC ACID	5-KETO-D-GLUCONATE	0.904716335
GUANIDINOSUCCINIC ACID	5-KETO-D-GLUCONATE	0.823195836
N1-ACETYLSPERMIDINE	5-KETO-D-GLUCONATE	0.876484095
4-AMINOHIPPURIC ACID	5-KETO-D-GLUCONATE	0.907372221
5-NONENOYLGLYCINE	5-KETO-D-GLUCONATE	0.895900817
2-HYDROXYOCT-2-ENOYLGLYCINE	5-KETO-D-GLUCONATE	0.917575596
6-HYDROXYOCT-1-ENOYLGLYCINE	5-KETO-D-GLUCONATE	0.881255841
7-HYDROXYOCT-1-ENOYLGLYCINE	5-KETO-D-GLUCONATE	0.81597714
P-CHLOROBENZENE SULFONYL UREA	5-KETO-D-GLUCONATE	0.825315134
2,6-DI-TERT-BUTYL-4-HYDROXY-4-METHYL-2,5-CYCLOHEXADIENONE	5-KETO-D-GLUCONATE	0.836204922
EQUOL	5-KETO-D-GLUCONATE	0.896973251
2-HYDROXYMYRISTIC ACID	5-KETO-D-GLUCONATE	0.838910126
3,5-DIHYDROXY-4-(SULFOOXY)BENZOIC ACID	5-KETO-D-GLUCONATE	0.82956199
NICOTINIC ACID RIBONUCLEOSIDE	5-KETO-D-GLUCONATE	0.844752138
BIOTIN SULFONE	5-KETO-D-GLUCONATE	0.827399886
ENTECAVIR	5-KETO-D-GLUCONATE	0.810808631
ISOVALERYLGLUCURONIDE	5-KETO-D-GLUCONATE	0.826475998
13-CIS RETINOL	5-KETO-D-GLUCONATE	0.866075588
BRIMONIDINE	5-KETO-D-GLUCONATE	0.805388987
FAMCICLOVIR	5-KETO-D-GLUCONATE	0.829143629
TORASEMIDE	5-KETO-D-GLUCONATE	0.861400393
PROSTAGLANDIN F1A	5-KETO-D-GLUCONATE	0.863815346
6-[3-(2-CARBOXYETHYL)-5-HYDROXYPHENOXY]-3,4,5-TRIHYDROXYOXANE-2-CARBOXYLIC ACID	5-KETO-D-GLUCONATE	0.803455092
ALFUZOSIN	5-KETO-D-GLUCONATE	0.825227826
25-HYDROXYCHOLESTEROL	5-KETO-D-GLUCONATE	0.819323839
RANOLAZINE	5-KETO-D-GLUCONATE	0.907520084
ARACHIDONOYLCARNITINE	5-KETO-D-GLUCONATE	0.886486959
MASLINIC ACID	5-KETO-D-GLUCONATE	0.961426938
DG(15:0/15:0/0:0)	5-KETO-D-GLUCONATE	0.860325889
DG(18:0/18:3(9Z,12Z,15Z)/0:0)	5-KETO-D-GLUCONATE	0.861965119
DG(18:1(9Z)/18:1(9Z)/0:0)	5-KETO-D-GLUCONATE	0.818636144
DG(14:0/22:1(13Z)/0:0)	5-KETO-D-GLUCONATE	0.854837456
DG(20:5(5Z,8Z,11Z,14Z,17Z)/20:1(11Z)/0:0)	5-KETO-D-GLUCONATE	0.826140077
DG(20:2(11Z,14Z)/20:2(11Z,14Z)/0:0)	5-KETO-D-GLUCONATE	0.802516088
LACTO-N-TETRAOSE	5-KETO-D-GLUCONATE	0.807545125
PC(14:0/18:3(6Z,9Z,12Z))	5-KETO-D-GLUCONATE	0.808393901
PC(14:1(9Z)/18:1(11Z))	5-KETO-D-GLUCONATE	0.826757875
PE(20:0/16:1(9Z))	5-KETO-D-GLUCONATE	0.81277404
PC(14:1(9Z)/20:3(8Z,11Z,14Z))	5-KETO-D-GLUCONATE	0.84737662
PE(20:4(5Z,8Z,11Z,14Z)/20:0)	5-KETO-D-GLUCONATE	0.83753026
PC(20:5(5Z,8Z,11Z,14Z,17Z)/18:0)	5-KETO-D-GLUCONATE	0.86057731
PC(20:3(8Z,11Z,14Z)/18:0)	5-KETO-D-GLUCONATE	0.851691734
PC(20:3(8Z,11Z,14Z)/20:2(11Z,14Z))	5-KETO-D-GLUCONATE	0.820529288
PI(20:2(11Z,14Z)/16:0)	5-KETO-D-GLUCONATE	0.804093503
PC(18:0/24:0)	5-KETO-D-GLUCONATE	0.835871646
PI(18:2(9Z,12Z)/20:2(11Z,14Z))	5-KETO-D-GLUCONATE	0.85318027
TG(16:0/18:2(9Z,12Z)/20:0)	5-KETO-D-GLUCONATE	0.87302222
TG(18:0/18:1(9Z)/18:1(9Z))	5-KETO-D-GLUCONATE	0.874453404
PI(20:3(8Z,11Z,14Z)/20:3(5Z,8Z,11Z))	5-KETO-D-GLUCONATE	0.854288603
TG(18:0/18:0/20:1(11Z))	5-KETO-D-GLUCONATE	0.872019077
TG(18:2(9Z,12Z)/20:0/20:1(11Z))	5-KETO-D-GLUCONATE	0.871099902
TRIHEXOSYLCERAMIDE (D18:1/24:1(15Z))	5-KETO-D-GLUCONATE	0.829246234
LACTO-N-FUCOHEPTAOSE	5-KETO-D-GLUCONATE	0.827692779
O-TYROSINE	MONOETHYL PHTHALATE	0.852150287
3-(2,4-DIHYDROXYPHENYL)PROPANOIC ACID	MONOETHYL PHTHALATE	0.907567938
4-AMINOHIPPURIC ACID	MONOETHYL PHTHALATE	0.820894886
TETRAETHYLENE GLYCOL	MONOETHYL PHTHALATE	0.870051717
4-OCTENOYLGLYCINE	MONOETHYL PHTHALATE	0.873335155
SEDOHEPTULOSE	MONOETHYL PHTHALATE	0.932211054
5-NONENOYLGLYCINE	MONOETHYL PHTHALATE	0.823041476
6-NONENOYLGLYCINE	MONOETHYL PHTHALATE	0.875973411
6-HYDROXYOCT-4-ENOYLGLYCINE	MONOETHYL PHTHALATE	0.872896138
PORPHOBILINOGEN	MONOETHYL PHTHALATE	0.815690738
RILUZOLE	MONOETHYL PHTHALATE	0.924216802
3,5-DIHYDROXY-4-(SULFOOXY)BENZOIC ACID	MONOETHYL PHTHALATE	0.812329568
N-ACETYLVANILALANINE	MONOETHYL PHTHALATE	0.848641242
TRIPELENNAMINE	MONOETHYL PHTHALATE	0.897233045
DEOXYGUANOSINE	MONOETHYL PHTHALATE	0.854535364
ENTECAVIR	MONOETHYL PHTHALATE	0.849924481
ZOLMITRIPTAN	MONOETHYL PHTHALATE	0.887108564
BRIMONIDINE	MONOETHYL PHTHALATE	0.817927816
GLUTATHIONE	MONOETHYL PHTHALATE	0.925372634
METIXENE	MONOETHYL PHTHALATE	0.832383263
CYCLIC AMP	MONOETHYL PHTHALATE	0.856722854
6-(3-CARBOXY-5-HYDROXYPHENOXY)-3,4,5-TRIHYDROXYOXANE-2-CARBOXYLIC ACID	MONOETHYL PHTHALATE	0.899696586
HEPTADECANOYL CARNITINE	MONOETHYL PHTHALATE	0.901357345
ARACHIDONOYLCARNITINE	MONOETHYL PHTHALATE	0.840318232
RALOXIFENE	MONOETHYL PHTHALATE	0.879522376
DG(20:2(11Z,14Z)/14:0/0:0)	MONOETHYL PHTHALATE	0.911282651
DG(18:1(9Z)/18:1(9Z)/0:0)	MONOETHYL PHTHALATE	0.892785313
PE(18:0/15:0)	MONOETHYL PHTHALATE	0.807724391
PG(18:0/16:1(9Z))	MONOETHYL PHTHALATE	0.905310086
PG(18:3(9Z,12Z,15Z)/18:1(11Z))	MONOETHYL PHTHALATE	0.812175998
PC(P-18:1(9Z)/20:3(8Z,11Z,14Z))	MONOETHYL PHTHALATE	0.886797219
TG(16:0/16:1(9Z)/16:1(9Z))	MONOETHYL PHTHALATE	0.907758569
PC(18:0/22:0)	MONOETHYL PHTHALATE	0.82743029
1-METHYLADENINE	4-AMINOHIPPURIC ACID	0.85704384
PHENYLGLYOXYLIC ACID	4-AMINOHIPPURIC ACID	0.841630985
4-METHOXYPHENYLACETIC ACID	4-AMINOHIPPURIC ACID	0.867098849
GUANIDINOSUCCINIC ACID	4-AMINOHIPPURIC ACID	0.893074842
SULFORAPHANE	4-AMINOHIPPURIC ACID	0.857463751
(R)-SALSOLINOL	4-AMINOHIPPURIC ACID	0.810625845
MONOMETHYL PHTHALATE	4-AMINOHIPPURIC ACID	0.83792532
CARBIMAZOLE	4-AMINOHIPPURIC ACID	0.844536185
N1-ACETYLSPERMIDINE	4-AMINOHIPPURIC ACID	0.926139981
5-KETO-D-GLUCONATE	4-AMINOHIPPURIC ACID	0.907372221
MONOETHYL PHTHALATE	4-AMINOHIPPURIC ACID	0.820894886
TETRAETHYLENE GLYCOL	4-AMINOHIPPURIC ACID	0.893546551
1,3-DIMETHYLURIC ACID	4-AMINOHIPPURIC ACID	0.820336352
(S)-LIPOIC ACID	4-AMINOHIPPURIC ACID	0.854764189
SEDOHEPTULOSE	4-AMINOHIPPURIC ACID	0.845864866
5-NONENOYLGLYCINE	4-AMINOHIPPURIC ACID	0.995001917
8-NONENOYLGLYCINE	4-AMINOHIPPURIC ACID	0.879771275
1-HYDROXYOCT-3-ENOYLGLYCINE	4-AMINOHIPPURIC ACID	0.859896761
2-HYDROXYOCT-2-ENOYLGLYCINE	4-AMINOHIPPURIC ACID	0.943269923
6-HYDROXYOCT-1-ENOYLGLYCINE	4-AMINOHIPPURIC ACID	0.946935829
7-HYDROXYOCT-1-ENOYLGLYCINE	4-AMINOHIPPURIC ACID	0.867547523
GAMMA-GLUTAMYLALANINE	4-AMINOHIPPURIC ACID	0.841835557
5-HYDROXYPHENYLPROPIONYLGLYCINE	4-AMINOHIPPURIC ACID	0.830305748
TRIMETHYLSILYL NONANOIC ACID	4-AMINOHIPPURIC ACID	0.814147198
NALIDIXIC ACID	4-AMINOHIPPURIC ACID	0.870200619
P-CHLOROBENZENE SULFONYL UREA	4-AMINOHIPPURIC ACID	0.918937618
2,6-DI-TERT-BUTYL-4-HYDROXY-4-METHYL-2,5-CYCLOHEXADIENONE	4-AMINOHIPPURIC ACID	0.829565374
EQUOL	4-AMINOHIPPURIC ACID	0.966602434
2-HYDROXYMYRISTIC ACID	4-AMINOHIPPURIC ACID	0.891034483
3,5-DIHYDROXY-4-(SULFOOXY)BENZOIC ACID	4-AMINOHIPPURIC ACID	0.881679586
N-ACETYLVANILALANINE	4-AMINOHIPPURIC ACID	0.853207483
1,2-BENZENEDIOL BIS(TRIMETHYLSILYL) ETHER	4-AMINOHIPPURIC ACID	0.870588184
TRIPELENNAMINE	4-AMINOHIPPURIC ACID	0.823114997
NICOTINIC ACID RIBONUCLEOSIDE	4-AMINOHIPPURIC ACID	0.922939831
FRUCTOSE 6-PHOSPHATE	4-AMINOHIPPURIC ACID	0.873730252
STEARALDEHYDE	4-AMINOHIPPURIC ACID	0.817502231
BIOTIN SULFONE	4-AMINOHIPPURIC ACID	0.89204972
ENTECAVIR	4-AMINOHIPPURIC ACID	0.891946738
ISOVALERYLGLUCURONIDE	4-AMINOHIPPURIC ACID	0.879152827
MORPHINE	4-AMINOHIPPURIC ACID	0.847624606
13-CIS RETINOL	4-AMINOHIPPURIC ACID	0.899647598
BRIMONIDINE	4-AMINOHIPPURIC ACID	0.899979474
FAMCICLOVIR	4-AMINOHIPPURIC ACID	0.928998953
6-(3-CARBOXY-5-HYDROXYPHENOXY)-3,4,5-TRIHYDROXYOXANE-2-CARBOXYLIC ACID	4-AMINOHIPPURIC ACID	0.855695183
PIROXICAM	4-AMINOHIPPURIC ACID	0.803001463
TORASEMIDE	4-AMINOHIPPURIC ACID	0.901621629
PROSTAGLANDIN F1A	4-AMINOHIPPURIC ACID	0.957308404
6-[3-(2-CARBOXYETHYL)-5-HYDROXYPHENOXY]-3,4,5-TRIHYDROXYOXANE-2-CARBOXYLIC ACID	4-AMINOHIPPURIC ACID	0.83883591
ALFUZOSIN	4-AMINOHIPPURIC ACID	0.901040216
25-HYDROXYCHOLESTEROL	4-AMINOHIPPURIC ACID	0.847082247
HEPTADECANOYL CARNITINE	4-AMINOHIPPURIC ACID	0.806793852
BENDROFLUMETHIAZIDE	4-AMINOHIPPURIC ACID	0.87907225
RANOLAZINE	4-AMINOHIPPURIC ACID	0.944700538
ARACHIDONOYLCARNITINE	4-AMINOHIPPURIC ACID	0.908438083
5-METHYLTETRAHYDROFOLIC ACID	4-AMINOHIPPURIC ACID	0.817545968
MASLINIC ACID	4-AMINOHIPPURIC ACID	0.925686194
DG(14:1(9Z)/16:1(9Z)/0:0)	4-AMINOHIPPURIC ACID	0.868577765
DG(15:0/15:0/0:0)	4-AMINOHIPPURIC ACID	0.915808158
DG(16:0/18:1(11Z)/0:0)	4-AMINOHIPPURIC ACID	0.871876641
DG(18:1(11Z)/16:0/0:0)	4-AMINOHIPPURIC ACID	0.849765799
DG(18:0/18:3(9Z,12Z,15Z)/0:0)	4-AMINOHIPPURIC ACID	0.905961332
DG(18:1(9Z)/18:1(9Z)/0:0)	4-AMINOHIPPURIC ACID	0.910500999
DG(14:0/22:1(13Z)/0:0)	4-AMINOHIPPURIC ACID	0.887036354
DG(20:3(5Z,8Z,11Z)/18:2(9Z,12Z)/0:0)	4-AMINOHIPPURIC ACID	0.867899892
DG(22:5(4Z,7Z,10Z,13Z,16Z)/16:0/0:0)	4-AMINOHIPPURIC ACID	0.827780454
DG(18:2(9Z,12Z)/20:0/0:0)	4-AMINOHIPPURIC ACID	0.813217513
DG(20:4(8Z,11Z,14Z,17Z)/20:2(11Z,14Z)/0:0)	4-AMINOHIPPURIC ACID	0.822045322
DG(20:5(5Z,8Z,11Z,14Z,17Z)/20:1(11Z)/0:0)	4-AMINOHIPPURIC ACID	0.900188086
DG(20:2(11Z,14Z)/20:2(11Z,14Z)/0:0)	4-AMINOHIPPURIC ACID	0.810127114
LACTO-N-TETRAOSE	4-AMINOHIPPURIC ACID	0.907810969
PC(14:0/P-18:1(11Z))	4-AMINOHIPPURIC ACID	0.845203925
PC(P-16:0/16:1(9Z))	4-AMINOHIPPURIC ACID	0.853184047
PC(14:0/18:3(6Z,9Z,12Z))	4-AMINOHIPPURIC ACID	0.845166723
PC(14:1(9Z)/18:1(11Z))	4-AMINOHIPPURIC ACID	0.900852655
PC(P-18:1(11Z)/16:1(9Z))	4-AMINOHIPPURIC ACID	0.890671955
PE(20:0/16:1(9Z))	4-AMINOHIPPURIC ACID	0.899131155
PG(18:0/16:1(9Z))	4-AMINOHIPPURIC ACID	0.809484851
PG(18:1(9Z)/16:0)	4-AMINOHIPPURIC ACID	0.806691383
PC(14:1(9Z)/20:3(8Z,11Z,14Z))	4-AMINOHIPPURIC ACID	0.896670011
PC(20:2(11Z,14Z)/14:0)	4-AMINOHIPPURIC ACID	0.810792407
PE(20:3(5Z,8Z,11Z)/18:0)	4-AMINOHIPPURIC ACID	0.801429708
PE(20:4(5Z,8Z,11Z,14Z)/20:0)	4-AMINOHIPPURIC ACID	0.923302536
PG(18:2(9Z,12Z)/20:3(5Z,8Z,11Z))	4-AMINOHIPPURIC ACID	0.885852889
PC(P-18:1(9Z)/20:0)	4-AMINOHIPPURIC ACID	0.802449576
TG(16:0/16:1(9Z)/16:1(9Z))	4-AMINOHIPPURIC ACID	0.856798515
PC(20:5(5Z,8Z,11Z,14Z,17Z)/18:1(9Z))	4-AMINOHIPPURIC ACID	0.87253525
PC(20:5(5Z,8Z,11Z,14Z,17Z)/18:0)	4-AMINOHIPPURIC ACID	0.918675718
PC(20:3(8Z,11Z,14Z)/18:0)	4-AMINOHIPPURIC ACID	0.873917837
PC(20:3(8Z,11Z,14Z)/20:2(11Z,14Z))	4-AMINOHIPPURIC ACID	0.851833204
TG(16:0/18:2(9Z,12Z)/18:2(9Z,12Z))	4-AMINOHIPPURIC ACID	0.800820967
PC(20:1(11Z)/22:5(4Z,7Z,10Z,13Z,16Z))	4-AMINOHIPPURIC ACID	0.8703097
PC(18:0/24:0)	4-AMINOHIPPURIC ACID	0.887260364
PI(18:2(9Z,12Z)/20:2(11Z,14Z))	4-AMINOHIPPURIC ACID	0.873724821
TG(16:0/18:2(9Z,12Z)/20:0)	4-AMINOHIPPURIC ACID	0.912365569
TG(18:0/18:1(9Z)/18:1(9Z))	4-AMINOHIPPURIC ACID	0.912763991
TG(16:1(9Z)/18:0/20:1(11Z))	4-AMINOHIPPURIC ACID	0.82061212
PI(20:3(8Z,11Z,14Z)/20:3(5Z,8Z,11Z))	4-AMINOHIPPURIC ACID	0.87615249
TG(18:0/18:0/20:1(11Z))	4-AMINOHIPPURIC ACID	0.933385714
TG(18:2(9Z,12Z)/20:0/20:1(11Z))	4-AMINOHIPPURIC ACID	0.931539843
TRIHEXOSYLCERAMIDE (D18:1/24:1(15Z))	4-AMINOHIPPURIC ACID	0.888549052
PHENYLGLYOXYLIC ACID	TETRAETHYLENE GLYCOL	0.827547364
GUANIDINOSUCCINIC ACID	TETRAETHYLENE GLYCOL	0.906327136
SULFORAPHANE	TETRAETHYLENE GLYCOL	0.809272013
D-GLUCOSE	TETRAETHYLENE GLYCOL	0.820058059
O-TYROSINE	TETRAETHYLENE GLYCOL	0.810320131
N1-ACETYLSPERMIDINE	TETRAETHYLENE GLYCOL	0.905760404
MONOETHYL PHTHALATE	TETRAETHYLENE GLYCOL	0.870051717
4-AMINOHIPPURIC ACID	TETRAETHYLENE GLYCOL	0.893546551
1,3-DIMETHYLURIC ACID	TETRAETHYLENE GLYCOL	0.86366027
1,4-OCTADIENOYLGLYCINE	TETRAETHYLENE GLYCOL	0.842200564
1,7-OCTADIENOYLGLYCINE	TETRAETHYLENE GLYCOL	0.836322513
(S)-LIPOIC ACID	TETRAETHYLENE GLYCOL	0.85268836
SEDOHEPTULOSE	TETRAETHYLENE GLYCOL	0.841204461
CARMUSTINE	TETRAETHYLENE GLYCOL	0.812248182
5-NONENOYLGLYCINE	TETRAETHYLENE GLYCOL	0.909991554
6-NONENOYLGLYCINE	TETRAETHYLENE GLYCOL	0.849520802
8-NONENOYLGLYCINE	TETRAETHYLENE GLYCOL	0.89319996
1-HYDROXYOCT-3-ENOYLGLYCINE	TETRAETHYLENE GLYCOL	0.898424313
2-HYDROXYOCT-2-ENOYLGLYCINE	TETRAETHYLENE GLYCOL	0.823207271
6-HYDROXYOCT-1-ENOYLGLYCINE	TETRAETHYLENE GLYCOL	0.892734478
6-HYDROXYOCT-4-ENOYLGLYCINE	TETRAETHYLENE GLYCOL	0.834478547
7-HYDROXYOCT-1-ENOYLGLYCINE	TETRAETHYLENE GLYCOL	0.849892842
GAMMA-GLUTAMYLALANINE	TETRAETHYLENE GLYCOL	0.822406419
2-HYDROXYPHENYLPROPIONYLGLYCINE	TETRAETHYLENE GLYCOL	0.864708691
TRIMETHYLSILYL NONANOIC ACID	TETRAETHYLENE GLYCOL	0.81707243
P-CHLOROBENZENE SULFONYL UREA	TETRAETHYLENE GLYCOL	0.903442696
RILUZOLE	TETRAETHYLENE GLYCOL	0.873568706
EQUOL	TETRAETHYLENE GLYCOL	0.865872326
CYTIDINE	TETRAETHYLENE GLYCOL	0.813964635
2-HYDROXYMYRISTIC ACID	TETRAETHYLENE GLYCOL	0.863767427
NOREPINEPHRINE SULFATE	TETRAETHYLENE GLYCOL	0.877634036
3,5-DIHYDROXY-4-(SULFOOXY)BENZOIC ACID	TETRAETHYLENE GLYCOL	0.811561906
N-ACETYLVANILALANINE	TETRAETHYLENE GLYCOL	0.876151611
1,2-BENZENEDIOL BIS(TRIMETHYLSILYL) ETHER	TETRAETHYLENE GLYCOL	0.831553976
KETOROLAC	TETRAETHYLENE GLYCOL	0.826143149
TRIPELENNAMINE	TETRAETHYLENE GLYCOL	0.849947564
NICOTINIC ACID RIBONUCLEOSIDE	TETRAETHYLENE GLYCOL	0.862993237
FRUCTOSE 6-PHOSPHATE	TETRAETHYLENE GLYCOL	0.81849107
MYO-INOSITOL 1-PHOSPHATE	TETRAETHYLENE GLYCOL	0.820947589
METOPROLOL	TETRAETHYLENE GLYCOL	0.854237817
ENTECAVIR	TETRAETHYLENE GLYCOL	0.810578933
ISOVALERYLGLUCURONIDE	TETRAETHYLENE GLYCOL	0.837265287
LUTEOLIN	TETRAETHYLENE GLYCOL	0.800989755
13-CIS RETINOL	TETRAETHYLENE GLYCOL	0.813682713
ZOLMITRIPTAN	TETRAETHYLENE GLYCOL	0.825056473
CYPROHEPTADINE	TETRAETHYLENE GLYCOL	0.88715264
BRIMONIDINE	TETRAETHYLENE GLYCOL	0.932285765
17A-ETHYNYLESTRADIOL	TETRAETHYLENE GLYCOL	0.810572754
GLUTATHIONE	TETRAETHYLENE GLYCOL	0.841699042
8,9-EPOXYEICOSATRIENOIC ACID	TETRAETHYLENE GLYCOL	0.864085764
FAMCICLOVIR	TETRAETHYLENE GLYCOL	0.864518229
CYCLIC AMP	TETRAETHYLENE GLYCOL	0.809265807
6-(3-CARBOXY-5-HYDROXYPHENOXY)-3,4,5-TRIHYDROXYOXANE-2-CARBOXYLIC ACID	TETRAETHYLENE GLYCOL	0.849016426
TORASEMIDE	TETRAETHYLENE GLYCOL	0.820005262
PROSTAGLANDIN F1A	TETRAETHYLENE GLYCOL	0.897671982
GENTIAN VIOLET	TETRAETHYLENE GLYCOL	0.814512033
HEPTADECANOYL CARNITINE	TETRAETHYLENE GLYCOL	0.860859756
OXICONAZOLE	TETRAETHYLENE GLYCOL	0.831478464
6-HYDROXYFLUVASTATIN	TETRAETHYLENE GLYCOL	0.854126705
RANOLAZINE	TETRAETHYLENE GLYCOL	0.831461392
BENZTHIAZIDE	TETRAETHYLENE GLYCOL	0.893397294
ARACHIDONOYLCARNITINE	TETRAETHYLENE GLYCOL	0.867693548
RALOXIFENE	TETRAETHYLENE GLYCOL	0.802479743
CLOMOCYCLINE	TETRAETHYLENE GLYCOL	0.835352509
DG(14:1(9Z)/16:1(9Z)/0:0)	TETRAETHYLENE GLYCOL	0.920581187
DG(20:2(11Z,14Z)/14:0/0:0)	TETRAETHYLENE GLYCOL	0.863223796
DG(16:0/18:1(11Z)/0:0)	TETRAETHYLENE GLYCOL	0.836546426
HEME	TETRAETHYLENE GLYCOL	0.812100249
DG(18:1(9Z)/18:1(9Z)/0:0)	TETRAETHYLENE GLYCOL	0.956908043
DG(20:3(5Z,8Z,11Z)/18:2(9Z,12Z)/0:0)	TETRAETHYLENE GLYCOL	0.808686004
DG(20:2(11Z,14Z)/18:2(9Z,12Z)/0:0)	TETRAETHYLENE GLYCOL	0.850813757
DG(18:2(9Z,12Z)/20:0/0:0)	TETRAETHYLENE GLYCOL	0.837536394
DG(20:4(5Z,8Z,11Z,14Z)/20:3(8Z,11Z,14Z)/0:0)	TETRAETHYLENE GLYCOL	0.814361223
DG(20:4(8Z,11Z,14Z,17Z)/20:2(11Z,14Z)/0:0)	TETRAETHYLENE GLYCOL	0.900483139
PC(16:1(9Z)/14:1(9Z))	TETRAETHYLENE GLYCOL	0.840724642
LACTO-N-TETRAOSE	TETRAETHYLENE GLYCOL	0.837547844
PC(P-16:0/16:1(9Z))	TETRAETHYLENE GLYCOL	0.817742237
PE(P-16:0/20:2(11Z,14Z))	TETRAETHYLENE GLYCOL	0.836795984
PC(P-18:1(11Z)/16:1(9Z))	TETRAETHYLENE GLYCOL	0.853541136
PE(20:0/16:1(9Z))	TETRAETHYLENE GLYCOL	0.807842305
PG(18:0/16:1(9Z))	TETRAETHYLENE GLYCOL	0.839563243
PE(18:0/20:2(11Z,14Z))	TETRAETHYLENE GLYCOL	0.807444143
PC(18:1(11Z)/18:2(9Z,12Z))	TETRAETHYLENE GLYCOL	0.860583524
PC(20:3(5Z,8Z,11Z)/16:0)	TETRAETHYLENE GLYCOL	0.802470623
PC(22:2(13Z,16Z)/14:1(9Z))	TETRAETHYLENE GLYCOL	0.848787617
PC(P-18:1(9Z)/20:3(8Z,11Z,14Z))	TETRAETHYLENE GLYCOL	0.813078505
PE(20:4(5Z,8Z,11Z,14Z)/20:0)	TETRAETHYLENE GLYCOL	0.804537621
PG(18:2(9Z,12Z)/20:3(5Z,8Z,11Z))	TETRAETHYLENE GLYCOL	0.879408369
PC(P-18:1(9Z)/20:0)	TETRAETHYLENE GLYCOL	0.853408592
TG(16:0/16:1(9Z)/16:1(9Z))	TETRAETHYLENE GLYCOL	0.868038399
PC(20:2(11Z,14Z)/18:4(6Z,9Z,12Z,15Z))	TETRAETHYLENE GLYCOL	0.805453551
PC(20:5(5Z,8Z,11Z,14Z,17Z)/18:0)	TETRAETHYLENE GLYCOL	0.854674472
PC(22:2(13Z,16Z)/18:1(9Z))	TETRAETHYLENE GLYCOL	0.872468413
LACTO-N-FUCOPENTAOSE III	TETRAETHYLENE GLYCOL	0.812733136
TG(16:0/18:2(9Z,12Z)/18:2(9Z,12Z))	TETRAETHYLENE GLYCOL	0.805796339
PC(20:1(11Z)/22:5(4Z,7Z,10Z,13Z,16Z))	TETRAETHYLENE GLYCOL	0.858437781
PI(18:0/22:4(7Z,10Z,13Z,16Z))	TETRAETHYLENE GLYCOL	0.806378088
TG(18:2(9Z,12Z)/20:0/20:1(11Z))	TETRAETHYLENE GLYCOL	0.808675847
TG(20:1(11Z)/20:1(11Z)/20:4(5Z,8Z,11Z,14Z))	TETRAETHYLENE GLYCOL	0.813068872
TRIHEXOSYLCERAMIDE (D18:1/16:0)	TETRAETHYLENE GLYCOL	0.806460891
GUANIDINOSUCCINIC ACID	1,3-DIMETHYLURIC ACID	0.815393227
SULFORAPHANE	1,3-DIMETHYLURIC ACID	0.859746366
D-GLUCOSE	1,3-DIMETHYLURIC ACID	0.83854943
N1-ACETYLSPERMIDINE	1,3-DIMETHYLURIC ACID	0.851928657
1,4-BIS-(1,1-DIMETHYLETHYL)-BENZENE	1,3-DIMETHYLURIC ACID	0.816941606
4-AMINOHIPPURIC ACID	1,3-DIMETHYLURIC ACID	0.820336352
TETRAETHYLENE GLYCOL	1,3-DIMETHYLURIC ACID	0.86366027
1,4-OCTADIENOYLGLYCINE	1,3-DIMETHYLURIC ACID	0.843432333
1,7-OCTADIENOYLGLYCINE	1,3-DIMETHYLURIC ACID	0.869582297
(S)-LIPOIC ACID	1,3-DIMETHYLURIC ACID	0.886987733
CARMUSTINE	1,3-DIMETHYLURIC ACID	0.808262571
5-NONENOYLGLYCINE	1,3-DIMETHYLURIC ACID	0.83338066
1-HYDROXYOCT-3-ENOYLGLYCINE	1,3-DIMETHYLURIC ACID	0.837458025
6-HYDROXYOCT-1-ENOYLGLYCINE	1,3-DIMETHYLURIC ACID	0.807044473
GAMMA-GLUTAMYLALANINE	1,3-DIMETHYLURIC ACID	0.867755389
2-HYDROXYPHENYLPROPIONYLGLYCINE	1,3-DIMETHYLURIC ACID	0.832754582
TRIMETHYLSILYL NONANOIC ACID	1,3-DIMETHYLURIC ACID	0.876018207
P-CHLOROBENZENE SULFONYL UREA	1,3-DIMETHYLURIC ACID	0.890888975
1,11-UNDECANEDICARBOXYLIC ACID	1,3-DIMETHYLURIC ACID	0.893761254
NOREPINEPHRINE SULFATE	1,3-DIMETHYLURIC ACID	0.850621839
KETOROLAC	1,3-DIMETHYLURIC ACID	0.909238157
[truncated: 25,099 more rows]
